# Supplementary material for: Isolate Specific Transcriptome Changes Exerted by Isavuconazole Treatment in Candida auris
Source: Springer Nature journal article supplement (doi:10.1007/s11046-024-00919-1), 2024-12-27
Supplement: MOESM1 [file 11046_2024_919_MOESM1_ESM.xlsx]

## Sheet: Overview
Table S1	Results of the differential gene expression and gene set enrichment analyses
	The Candida Genome Database (http://www.candidagenome.org) and FungiDB (https://fungidb.org/fungidb/app) platforms were used with default settings.
	Bioinformatics & Evolutionary Genomics program (https://bioinformatics.psb.ugent.be/webtools/Venn/) was used to the Venn diagram.
Sheet 1	ISA treated non-WT vs. untreated non-WT
Sheet 2	ISA treated WT vs. untreated WT
Sheet 3	Untreated WT vs. untreated non-WT
Sheet 4	ISA treated WT vs. ISA treated non-WT
Sheet 5	The overlap of differentially expressed genes between the four conditions.
Upregulated and downregulated genes were defined as differentially expressed genes (DEGS; p<0.05) where the FoldChange > 1.5, and FoldChange < -1.5, respectively.

## Sheet: Sheet1
Sheet 1	ISA treated non-WT vs. untreated non-WT
Species	Platform:	Type of genes	Criteria	Number of genes
C. auris	Candida Genome Database	upregulated	DEG; FC>1.5	158
Biological process
GOID	GO_term	Cluster frequency	Background frequency	Corrected P-value	False discovery rate	Gene(s) annotated to the term	Directly Annotated GOID List
16126	sterol biosynthetic process	19 out of 158 genes, 12.0%	29 out of 5417 background genes, 0.5%	1.11e-20	0	B9J08_000261:B9J08_000367:B9J08_000920:B9J08_001266:ERG11:B9J08_001847:B9J08_002349:B9J08_002817:ERG4:B9J08_003026:B9J08_003224:B9J08_003345:B9J08_003730:ERG3:B9J08_004587:B9J08_004742:B9J08_004943:B9J08_004982:B9J08_005340	9410:15914:8299:8654:9058:19287:7005:15936:6696:16126:6879:6694:35690:43942:8610:32443
6694	steroid biosynthetic process	19 out of 158 genes, 12.0%	29 out of 5417 background genes, 0.5%	1.11e-20	0	B9J08_000261:B9J08_000367:B9J08_000920:B9J08_001266:ERG11:B9J08_001847:B9J08_002349:B9J08_002817:ERG4:B9J08_003026:B9J08_003224:B9J08_003345:B9J08_003730:ERG3:B9J08_004587:B9J08_004742:B9J08_004943:B9J08_004982:B9J08_005340	9410:15914:8299:8654:9058:19287:7005:15936:6696:16126:6879:6694:43942:35690:8610:32443
16129	phytosteroid biosynthetic process	17 out of 158 genes, 10.8%	26 out of 5417 background genes, 0.5%	2.61e-18	0	B9J08_000261:B9J08_000367:B9J08_000920:B9J08_001266:ERG11:B9J08_001847:B9J08_002349:B9J08_002817:ERG4:B9J08_003026:B9J08_003224:B9J08_003345:B9J08_003730:ERG3:B9J08_004587:B9J08_004943:B9J08_005340	8299:9058:19287:7005:15936:6696:16126:6879:6694:35690:8610:32443
1902653	secondary alcohol biosynthetic process	17 out of 158 genes, 10.8%	26 out of 5417 background genes, 0.5%	2.61e-18	0	B9J08_000261:B9J08_000367:B9J08_000920:B9J08_001266:ERG11:B9J08_001847:B9J08_002349:B9J08_002817:ERG4:B9J08_003026:B9J08_003224:B9J08_003345:B9J08_003730:ERG3:B9J08_004587:B9J08_004943:B9J08_005340	8299:9058:19287:7005:15936:6696:16126:6879:6694:35690:8610:32443
6696	ergosterol biosynthetic process	17 out of 158 genes, 10.8%	26 out of 5417 background genes, 0.5%	2.61e-18	0	B9J08_000261:B9J08_000367:B9J08_000920:B9J08_001266:ERG11:B9J08_001847:B9J08_002349:B9J08_002817:ERG4:B9J08_003026:B9J08_003224:B9J08_003345:B9J08_003730:ERG3:B9J08_004587:B9J08_004943:B9J08_005340	8299:9058:19287:7005:15936:6696:16126:6879:6694:35690:8610:32443
97384	cellular lipid biosynthetic process	17 out of 158 genes, 10.8%	26 out of 5417 background genes, 0.5%	2.61e-18	0	B9J08_000261:B9J08_000367:B9J08_000920:B9J08_001266:ERG11:B9J08_001847:B9J08_002349:B9J08_002817:ERG4:B9J08_003026:B9J08_003224:B9J08_003345:B9J08_003730:ERG3:B9J08_004587:B9J08_004943:B9J08_005340	8299:9058:19287:7005:15936:6696:16126:6879:6694:35690:8610:32443
16125	sterol metabolic process	19 out of 158 genes, 12.0%	36 out of 5417 background genes, 0.7%	4e-18	0	B9J08_000261:B9J08_000367:B9J08_000920:B9J08_001266:ERG11:B9J08_001847:B9J08_002349:B9J08_002817:ERG4:B9J08_003026:B9J08_003224:B9J08_003345:B9J08_003730:ERG3:B9J08_004587:B9J08_004742:B9J08_004943:B9J08_004982:B9J08_005340	9410:15914:8299:8654:9058:19287:7005:15936:6696:16126:6879:6694:43942:35690:8610:32443
8202	steroid metabolic process	19 out of 158 genes, 12.0%	38 out of 5417 background genes, 0.7%	1.56e-17	0	B9J08_000261:B9J08_000367:B9J08_000920:B9J08_001266:ERG11:B9J08_001847:B9J08_002349:B9J08_002817:ERG4:B9J08_003026:B9J08_003224:B9J08_003345:B9J08_003730:ERG3:B9J08_004587:B9J08_004742:B9J08_004943:B9J08_004982:B9J08_005340	9410:15914:8299:8654:9058:19287:7005:15936:6696:16126:6879:6694:43942:35690:8610:32443
16128	phytosteroid metabolic process	17 out of 158 genes, 10.8%	28 out of 5417 background genes, 0.5%	1.71e-17	0	B9J08_000261:B9J08_000367:B9J08_000920:B9J08_001266:ERG11:B9J08_001847:B9J08_002349:B9J08_002817:ERG4:B9J08_003026:B9J08_003224:B9J08_003345:B9J08_003730:ERG3:B9J08_004587:B9J08_004943:B9J08_005340	8299:9058:19287:7005:15936:6696:16126:6879:6694:35690:8610:32443
8204	ergosterol metabolic process	17 out of 158 genes, 10.8%	28 out of 5417 background genes, 0.5%	1.71e-17	0	B9J08_000261:B9J08_000367:B9J08_000920:B9J08_001266:ERG11:B9J08_001847:B9J08_002349:B9J08_002817:ERG4:B9J08_003026:B9J08_003224:B9J08_003345:B9J08_003730:ERG3:B9J08_004587:B9J08_004943:B9J08_005340	8299:9058:19287:7005:15936:6696:16126:6879:6694:35690:8610:32443
1902652	secondary alcohol metabolic process	17 out of 158 genes, 10.8%	34 out of 5417 background genes, 0.6%	1.6e-15	0	B9J08_000261:B9J08_000367:B9J08_000920:B9J08_001266:ERG11:B9J08_001847:B9J08_002349:B9J08_002817:ERG4:B9J08_003026:B9J08_003224:B9J08_003345:B9J08_003730:ERG3:B9J08_004587:B9J08_004943:B9J08_005340	8299:9058:19287:7005:15936:6696:16126:6879:6694:35690:8610:32443
1901617	organic hydroxy compound biosynthetic process	19 out of 158 genes, 12.0%	57 out of 5417 background genes, 1.1%	1.76e-13	0	B9J08_000261:B9J08_000367:B9J08_000920:B9J08_001266:ERG11:B9J08_001847:B9J08_002349:B9J08_002817:ERG4:B9J08_003026:B9J08_003224:B9J08_003345:B9J08_003730:ERG3:B9J08_004587:B9J08_004742:B9J08_004943:B9J08_004982:B9J08_005340	9410:15914:8299:8654:9058:19287:7005:15936:6696:16126:6879:6694:43942:35690:8610:32443
46165	alcohol biosynthetic process	17 out of 158 genes, 10.8%	47 out of 5417 background genes, 0.9%	1.35e-12	0	B9J08_000261:B9J08_000367:B9J08_000920:B9J08_001266:ERG11:B9J08_001847:B9J08_002349:B9J08_002817:ERG4:B9J08_003026:B9J08_003224:B9J08_003345:B9J08_003730:ERG3:B9J08_004587:B9J08_004943:B9J08_005340	8299:9058:19287:7005:15936:6696:16126:6879:6694:35690:8610:32443
1901615	organic hydroxy compound metabolic process	20 out of 158 genes, 12.7%	108 out of 5417 background genes, 2.0%	6.06e-09	0	B9J08_000261:B9J08_000367:B9J08_000491:B9J08_000920:B9J08_001266:ERG11:B9J08_001847:B9J08_002349:B9J08_002817:ERG4:B9J08_003026:B9J08_003224:B9J08_003345:B9J08_003730:ERG3:B9J08_004587:B9J08_004742:B9J08_004943:B9J08_004982:B9J08_005340	9410:15914:8299:6089:8654:9058:19287:7005:15936:6696:16126:6879:6694:43942:35690:8610:32443
8610	lipid biosynthetic process	22 out of 158 genes, 13.9%	149 out of 5417 background genes, 2.8%	5.86e-08	0	B9J08_000261:B9J08_000367:B9J08_000920:B9J08_001266:ERG11:B9J08_001847:B9J08_002349:B9J08_002361:B9J08_002817:ERG4:B9J08_003026:B9J08_003224:B9J08_003345:B9J08_003730:ERG3:B9J08_004352:B9J08_004587:B9J08_004742:B9J08_004943:B9J08_004982:B9J08_005230:B9J08_005340	9410:15914:6654:8299:6412:19510:8654:9058:6641:19287:7005:6656:15936:6696:16126:19433:6879:6694:43942:35690:8610:32443
6066	alcohol metabolic process	17 out of 158 genes, 10.8%	87 out of 5417 background genes, 1.6%	8.98e-08	0	B9J08_000261:B9J08_000367:B9J08_000920:B9J08_001266:ERG11:B9J08_001847:B9J08_002349:B9J08_002817:ERG4:B9J08_003026:B9J08_003224:B9J08_003345:B9J08_003730:ERG3:B9J08_004587:B9J08_004943:B9J08_005340	8299:9058:19287:7005:15936:6696:16126:6879:6694:35690:8610:32443
6629	lipid metabolic process	28 out of 158 genes, 17.7%	265 out of 5417 background genes, 4.9%	4.92e-07	0	B9J08_000261:B9J08_000367:B9J08_000920:B9J08_001266:ERG11:B9J08_001847:B9J08_002349:B9J08_002361:B9J08_002781:B9J08_002817:ERG4:B9J08_003026:B9J08_003185:B9J08_003224:B9J08_003345:B9J08_003486:B9J08_003730:ERG3:B9J08_004048:B9J08_004096:B9J08_004111:B9J08_004352:B9J08_004587:B9J08_004742:B9J08_004943:B9J08_004982:B9J08_005230:B9J08_005340	9410:1676:19510:9058:6635:2000114:7005:15936:6696:36151:46488:16126:17157:43001:6650:9395:8610:19395:16042:15914:8299:6654:6412:8654:6641:19287:6656:19433:6879:6694:6637:43942:35690:32443
44255	cellular lipid metabolic process	25 out of 158 genes, 15.8%	238 out of 5417 background genes, 4.4%	4.7e-06	0	B9J08_000261:B9J08_000367:B9J08_000920:B9J08_001266:ERG11:B9J08_001847:B9J08_002349:B9J08_002361:B9J08_002781:B9J08_002817:ERG4:B9J08_003026:B9J08_003185:B9J08_003224:B9J08_003345:B9J08_003486:B9J08_003730:ERG3:B9J08_004048:B9J08_004096:B9J08_004352:B9J08_004587:B9J08_004943:B9J08_004982:B9J08_005340	9410:1676:19510:9058:6635:2000114:7005:15936:6696:36151:46488:16126:17157:43001:6650:9395:8610:19395:15914:6654:8299:8654:6641:19287:6656:19433:6879:6637:6694:43942:35690:32443
44283	small molecule biosynthetic process	24 out of 158 genes, 15.2%	225 out of 5417 background genes, 4.2%	7e-06	0	B9J08_000261:B9J08_000367:B9J08_000382:B9J08_000920:B9J08_001224:B9J08_001266:ERG11:B9J08_001847:B9J08_002349:B9J08_002817:ERG4:B9J08_003026:B9J08_003224:B9J08_003345:B9J08_003631:B9J08_003665:B9J08_003722:B9J08_003730:ERG3:B9J08_004095:B9J08_004587:B9J08_004943:B9J08_005340:B9J08_005369	19752:9060:9058:7005:15936:6696:46084:16126:19878:103:8610:19280:6744:9086:6166:8299:8652:6144:19287:97:6879:6694:35690:15940:32443
44281	small molecule metabolic process	33 out of 158 genes, 20.9%	493 out of 5417 background genes, 9.1%	0.0011	0	B9J08_000261:B9J08_000367:B9J08_000382:B9J08_000491:B9J08_000920:B9J08_001224:B9J08_001266:ERG11:B9J08_001467:B9J08_001847:B9J08_002349:B9J08_002457:B9J08_002737:B9J08_002781:B9J08_002817:ERG4:B9J08_003026:B9J08_003185:B9J08_003186:B9J08_003224:B9J08_003345:B9J08_003631:B9J08_003665:B9J08_003722:B9J08_003730:ERG3:B9J08_004095:B9J08_004352:B9J08_004587:B9J08_004943:B9J08_005101:B9J08_005340:B9J08_…	19752:9060:1676:19510:9058:6635:7005:15936:9450:6696:46084:16126:19878:103:8610:43419:34599:19280:19395:6744:6556:9086:6166:8299:8652:6089:6144:6641:19287:6540:6656:6555:97:34354:6879:6637:6694:35690:15940:32443
Molecular function
GOID	GO_term	Cluster frequency	Background frequency	Corrected P-value	False discovery rate	Gene(s) annotated to the term	Directly Annotated GOID List
20037	heme binding	12 out of 158 genes, 7.6%	32 out of 5417 background genes, 0.6%	4.12e-09	0	B9J08_000491:B9J08_001224:ERG11:B9J08_001515:B9J08_001847:B9J08_002349:B9J08_002366:B9J08_002668:B9J08_004048:ERG5:B9J08_004478:B9J08_004742	51536:3824:4460:4601:4497:5506:8526:8047:16705:16491:10181:16712:4130:4783:249:9055:20037:8398
46906	tetrapyrrole binding	12 out of 158 genes, 7.6%	32 out of 5417 background genes, 0.6%	4.12e-09	0	B9J08_000491:B9J08_001224:ERG11:B9J08_001515:B9J08_001847:B9J08_002349:B9J08_002366:B9J08_002668:B9J08_004048:ERG5:B9J08_004478:B9J08_004742	51536:3824:4460:4601:4497:5506:8526:8047:16705:16491:16712:10181:4130:249:4783:9055:8398:20037
5506	iron ion binding	11 out of 158 genes, 7.0%	38 out of 5417 background genes, 0.7%	6.77e-07	0	B9J08_000367:B9J08_000705:ERG11:B9J08_001515:B9J08_002349:B9J08_002668:ERG3:ERG5:B9J08_004478:B9J08_005101:B9J08_005230	3735:4497:5506:16705:16491:16712:334:248:249:5524:254:8398:20037:16887
4497	monooxygenase activity	9 out of 158 genes, 5.7%	25 out of 5417 background genes, 0.5%	2.01e-06	0	B9J08_000261:B9J08_000367:ERG11:B9J08_001515:B9J08_002349:B9J08_002668:B9J08_003709:ERG5:B9J08_004478	50660:4497:5506:50661:4506:16705:16491:16712:249:4499:254:8398:20037
16705	oxidoreductase activity, acting on paired donors, with incorporation or reduction of molecular oxygen	10 out of 158 genes, 6.3%	35 out of 5417 background genes, 0.6%	3.97e-06	0	B9J08_000261:B9J08_000367:ERG11:B9J08_001515:B9J08_002349:B9J08_002668:B9J08_003709:ERG3:ERG5:B9J08_004478	50660:4497:5506:50661:4506:16705:16491:16712:248:249:4499:254:8398:20037
46914	transition metal ion binding	21 out of 158 genes, 13.3%	233 out of 5417 background genes, 4.3%	0.00037	0	UPC2:B9J08_000341:B9J08_000367:B9J08_000382:B9J08_000705:B9J08_000791:B9J08_000967:SOD4:ERG11:B9J08_001515:B9J08_002057:B9J08_002136:B9J08_002349:B9J08_002668:B9J08_002853:ERG3:ERG5:B9J08_004421:B9J08_004478:B9J08_005101:B9J08_005230	981:3735:4497:5506:8270:978:5507:43565:1228:16705:16491:16712:334:248:249:5524:254:3700:8398:20037:3871:16887
16491	oxidoreductase activity	24 out of 158 genes, 15.2%	317 out of 5417 background genes, 5.9%	0.0015	0.0029	B9J08_000261:B9J08_000367:B9J08_000491:B9J08_000844:B9J08_000920:B9J08_001161:B9J08_001224:ERG11:B9J08_001515:B9J08_002349:B9J08_002361:B9J08_002366:B9J08_002668:B9J08_002737:ERG4:B9J08_003026:B9J08_003224:B9J08_003709:ERG3:ERG5:B9J08_004478:B9J08_004656:B9J08_005101:B9J08_005230	50613:51536:3735:4460:50660:4601:16628:4806:9013:47012:5506:16616:50661:4506:16491:246:16712:334:252:50614:4130:3854:16620:249:4499:254:8398:140:3824:4497:16705:16627:10181:4109:4420:248:4783:20037
16712	oxidoreductase activity, acting on paired donors, with incorporation or reduction of molecular oxygen, reduced flavin or flavoprotein as one donor, and incorporation of one atom of oxygen	4 out of 158 genes, 2.5%	8 out of 5417 background genes, 0.1%	0.00538	0.005	B9J08_001515:B9J08_002668:ERG5:B9J08_004478	5506:16712:4497:16705:20037
46872	metal ion binding	22 out of 158 genes, 13.9%	331 out of 5417 background genes, 6.1%	0.02527	0.0111	UPC2:B9J08_000341:B9J08_000367:B9J08_000382:B9J08_000705:B9J08_000791:B9J08_000901:B9J08_000967:SOD4:ERG11:B9J08_001515:B9J08_002057:B9J08_002136:B9J08_002349:B9J08_002668:B9J08_002853:ERG3:ERG5:B9J08_004421:B9J08_004478:B9J08_005101:B9J08_005230	3735:5506:8270:5507:43565:16491:16712:334:249:254:3700:8398:16887:3824:981:4497:30976:287:978:1228:16705:248:16831:5524:20037:3871
5199	structural constituent of cell wall	3 out of 158 genes, 1.9%	5 out of 5417 background genes, 0.1%	0.02822	0.014	B9J08_002560:B9J08_003910:B9J08_004200	16298:5199
43169	cation binding	22 out of 158 genes, 13.9%	346 out of 5417 background genes, 6.4%	0.04734	0.0164	UPC2:B9J08_000341:B9J08_000367:B9J08_000382:B9J08_000705:B9J08_000791:B9J08_000901:B9J08_000967:SOD4:ERG11:B9J08_001515:B9J08_002057:B9J08_002136:B9J08_002349:B9J08_002668:B9J08_002853:ERG3:ERG5:B9J08_004421:B9J08_004478:B9J08_005101:B9J08_005230	3735:5506:8270:5507:43565:16491:16712:334:249:254:3700:8398:16887:3824:981:4497:30976:287:978:1228:16705:248:16831:5524:20037:3871
Cellular component
No significant ontology term can be found for input genes.
Species	Platform:	Type of genes	Criteria	Number of genes
C. auris	FungiDB	upregulated	DEG; FC>1.5	158
Biological process
ID	Name	Bgd count	Result count	Result gene list	Pct of bgd	Fold enrichment	Odds ratio	P-value	Benjamini	Bonferroni
GO:0016126	sterol biosynthetic process	32	19	B9J08_000261,B9J08_000367,B9J08_000920,B9J08_001266,B9J08_001448,B9J08_001847,B9J08_002349,B9J08_002817,B9J08_002852,B9J08_003026,B9J08_003224,B9J08_003345,B9J08_003730,B9J08_003737,B9J08_004587,B9J08_004742,B9J08_004943,B9J08_004982,B9J08_005340,	59.4	22.05	62.03	9.63573e-23	4.07592e-20	8.15183e-20
GO:0006694	steroid biosynthetic process	32	19	B9J08_000261,B9J08_000367,B9J08_000920,B9J08_001266,B9J08_001448,B9J08_001847,B9J08_002349,B9J08_002817,B9J08_002852,B9J08_003026,B9J08_003224,B9J08_003345,B9J08_003730,B9J08_003737,B9J08_004587,B9J08_004742,B9J08_004943,B9J08_004982,B9J08_005340,	59.4	22.05	62.03	9.63573e-23	4.07592e-20	8.15183e-20
GO:0016125	sterol metabolic process	39	19	B9J08_000261,B9J08_000367,B9J08_000920,B9J08_001266,B9J08_001448,B9J08_001847,B9J08_002349,B9J08_002817,B9J08_002852,B9J08_003026,B9J08_003224,B9J08_003345,B9J08_003730,B9J08_003737,B9J08_004587,B9J08_004742,B9J08_004943,B9J08_004982,B9J08_005340,	48.7	18.1	40.26	1.6378e-20	1.88046e-18	1.38558e-17
GO:0006696	ergosterol biosynthetic process	24	16	B9J08_000261,B9J08_000367,B9J08_000920,B9J08_001448,B9J08_001847,B9J08_002349,B9J08_002817,B9J08_002852,B9J08_003026,B9J08_003224,B9J08_003345,B9J08_003730,B9J08_003737,B9J08_004587,B9J08_004943,B9J08_005340,	66.7	24.76	82.65	1.77821e-20	1.88046e-18	1.50437e-17
GO:0044108	cellular alcohol biosynthetic process	24	16	B9J08_000261,B9J08_000367,B9J08_000920,B9J08_001448,B9J08_001847,B9J08_002349,B9J08_002817,B9J08_002852,B9J08_003026,B9J08_003224,B9J08_003345,B9J08_003730,B9J08_003737,B9J08_004587,B9J08_004943,B9J08_005340,	66.7	24.76	82.65	1.77821e-20	1.88046e-18	1.50437e-17
GO:1902653	secondary alcohol biosynthetic process	24	16	B9J08_000261,B9J08_000367,B9J08_000920,B9J08_001448,B9J08_001847,B9J08_002349,B9J08_002817,B9J08_002852,B9J08_003026,B9J08_003224,B9J08_003345,B9J08_003730,B9J08_003737,B9J08_004587,B9J08_004943,B9J08_005340,	66.7	24.76	82.65	1.77821e-20	1.88046e-18	1.50437e-17
GO:0016129	phytosteroid biosynthetic process	24	16	B9J08_000261,B9J08_000367,B9J08_000920,B9J08_001448,B9J08_001847,B9J08_002349,B9J08_002817,B9J08_002852,B9J08_003026,B9J08_003224,B9J08_003345,B9J08_003730,B9J08_003737,B9J08_004587,B9J08_004943,B9J08_005340,	66.7	24.76	82.65	1.77821e-20	1.88046e-18	1.50437e-17
GO:0097384	cellular lipid biosynthetic process	24	16	B9J08_000261,B9J08_000367,B9J08_000920,B9J08_001448,B9J08_001847,B9J08_002349,B9J08_002817,B9J08_002852,B9J08_003026,B9J08_003224,B9J08_003345,B9J08_003730,B9J08_003737,B9J08_004587,B9J08_004943,B9J08_005340,	66.7	24.76	82.65	1.77821e-20	1.88046e-18	1.50437e-17
GO:0008202	steroid metabolic process	40	19	B9J08_000261,B9J08_000367,B9J08_000920,B9J08_001266,B9J08_001448,B9J08_001847,B9J08_002349,B9J08_002817,B9J08_002852,B9J08_003026,B9J08_003224,B9J08_003345,B9J08_003730,B9J08_003737,B9J08_004587,B9J08_004742,B9J08_004943,B9J08_004982,B9J08_005340,	47.5	17.64	38.33	3.05138e-20	2.8683e-18	2.58147e-17
GO:0008204	ergosterol metabolic process	26	16	B9J08_000261,B9J08_000367,B9J08_000920,B9J08_001448,B9J08_001847,B9J08_002349,B9J08_002817,B9J08_002852,B9J08_003026,B9J08_003224,B9J08_003345,B9J08_003730,B9J08_003737,B9J08_004587,B9J08_004943,B9J08_005340,	61.5	22.86	66.09	1.22782e-19	8.65616e-18	1.03874e-16
GO:0016128	phytosteroid metabolic process	26	16	B9J08_000261,B9J08_000367,B9J08_000920,B9J08_001448,B9J08_001847,B9J08_002349,B9J08_002817,B9J08_002852,B9J08_003026,B9J08_003224,B9J08_003345,B9J08_003730,B9J08_003737,B9J08_004587,B9J08_004943,B9J08_005340,	61.5	22.86	66.09	1.22782e-19	8.65616e-18	1.03874e-16
GO:0044107	cellular alcohol metabolic process	26	16	B9J08_000261,B9J08_000367,B9J08_000920,B9J08_001448,B9J08_001847,B9J08_002349,B9J08_002817,B9J08_002852,B9J08_003026,B9J08_003224,B9J08_003345,B9J08_003730,B9J08_003737,B9J08_004587,B9J08_004943,B9J08_005340,	61.5	22.86	66.09	1.22782e-19	8.65616e-18	1.03874e-16
GO:1902652	secondary alcohol metabolic process	30	16	B9J08_000261,B9J08_000367,B9J08_000920,B9J08_001448,B9J08_001847,B9J08_002349,B9J08_002817,B9J08_002852,B9J08_003026,B9J08_003224,B9J08_003345,B9J08_003730,B9J08_003737,B9J08_004587,B9J08_004943,B9J08_005340,	53.3	19.81	47.17	3.07242e-18	1.99944e-16	2.59927e-15
GO:1901617	organic hydroxy compound biosynthetic process	62	19	B9J08_000261,B9J08_000367,B9J08_000920,B9J08_001266,B9J08_001448,B9J08_001847,B9J08_002349,B9J08_002817,B9J08_002852,B9J08_003026,B9J08_003224,B9J08_003345,B9J08_003730,B9J08_003737,B9J08_004587,B9J08_004742,B9J08_004943,B9J08_004982,B9J08_005340,	30.6	11.38	18.63	6.11343e-16	3.69426e-14	5.17196e-13
GO:0046165	alcohol biosynthetic process	45	16	B9J08_000261,B9J08_000367,B9J08_000920,B9J08_001448,B9J08_001847,B9J08_002349,B9J08_002817,B9J08_002852,B9J08_003026,B9J08_003224,B9J08_003345,B9J08_003730,B9J08_003737,B9J08_004587,B9J08_004943,B9J08_005340,	35.6	13.21	22.7	9.74747e-15	5.49757e-13	8.24636e-12
GO:1901615	organic hydroxy compound metabolic process	103	20	B9J08_000261,B9J08_000367,B9J08_000491,B9J08_000920,B9J08_001266,B9J08_001448,B9J08_001847,B9J08_002349,B9J08_002817,B9J08_002852,B9J08_003026,B9J08_003224,B9J08_003345,B9J08_003730,B9J08_003737,B9J08_004587,B9J08_004742,B9J08_004943,B9J08_004982,B9J08_005340,	19.4	7.21	10.16	1.40497e-12	7.42878e-11	1.1886e-09
GO:0006066	alcohol metabolic process	76	16	B9J08_000261,B9J08_000367,B9J08_000920,B9J08_001448,B9J08_001847,B9J08_002349,B9J08_002817,B9J08_002852,B9J08_003026,B9J08_003224,B9J08_003345,B9J08_003730,B9J08_003737,B9J08_004587,B9J08_004943,B9J08_005340,	21.1	7.82	10.89	8.11064e-11	4.03623e-09	6.8616e-08
GO:0008610	lipid biosynthetic process	160	22	B9J08_000261,B9J08_000367,B9J08_000920,B9J08_001266,B9J08_001448,B9J08_001847,B9J08_002349,B9J08_002361,B9J08_002817,B9J08_002852,B9J08_003026,B9J08_003224,B9J08_003345,B9J08_003730,B9J08_003737,B9J08_004352,B9J08_004587,B9J08_004742,B9J08_004943,B9J08_004982,B9J08_005230,B9J08_005340,	13.8	5.11	6.77	1.29655e-10	6.09381e-09	1.09689e-07
GO:0006629	lipid metabolic process	279	28	B9J08_000261,B9J08_000367,B9J08_000920,B9J08_001266,B9J08_001448,B9J08_001847,B9J08_002349,B9J08_002361,B9J08_002781,B9J08_002817,B9J08_002852,B9J08_003026,B9J08_003185,B9J08_003224,B9J08_003345,B9J08_003486,B9J08_003730,B9J08_003737,B9J08_004048,B9J08_004096,B9J08_004111,B9J08_004352,B9J08_004587,B9J08_004742,B9J08_004943,B9J08_004982,B9J08_005230,B9J08_005340,	10	3.73	4.9	5.76609e-10	2.56743e-08	4.87811e-07
GO:0044255	cellular lipid metabolic process	253	26	B9J08_000261,B9J08_000367,B9J08_000920,B9J08_001266,B9J08_001448,B9J08_001847,B9J08_002349,B9J08_002361,B9J08_002781,B9J08_002817,B9J08_002852,B9J08_003026,B9J08_003185,B9J08_003224,B9J08_003345,B9J08_003486,B9J08_003730,B9J08_003737,B9J08_004048,B9J08_004096,B9J08_004352,B9J08_004587,B9J08_004943,B9J08_004982,B9J08_005230,B9J08_005340,	10.3	3.82	4.96	1.59853e-09	6.76178e-08	1.35236e-06
GO:0044283	small molecule biosynthetic process	252	25	B9J08_000261,B9J08_000367,B9J08_000382,B9J08_000920,B9J08_001224,B9J08_001448,B9J08_001847,B9J08_002349,B9J08_002817,B9J08_002852,B9J08_003026,B9J08_003224,B9J08_003345,B9J08_003631,B9J08_003665,B9J08_003722,B9J08_003730,B9J08_003737,B9J08_004095,B9J08_004587,B9J08_004943,B9J08_005101,B9J08_005230,B9J08_005340,B9J08_005369,	9.9	3.68	4.72	7.28494e-09	2.93479e-07	6.16306e-06
GO:0055114	obsolete oxidation-reduction process	245	23	B9J08_000261,B9J08_000367,B9J08_000491,B9J08_000844,B9J08_000920,B9J08_001161,B9J08_001224,B9J08_001448,B9J08_001515,B9J08_002349,B9J08_002366,B9J08_002668,B9J08_002737,B9J08_002852,B9J08_003026,B9J08_003224,B9J08_003709,B9J08_003737,B9J08_004161,B9J08_004478,B9J08_004656,B9J08_005101,B9J08_005230,	9.4	3.49	4.36	9.09893e-08	3.49895e-06	7.69769e-05
GO:0044281	small molecule metabolic process	567	34	B9J08_000261,B9J08_000367,B9J08_000382,B9J08_000491,B9J08_000920,B9J08_001224,B9J08_001266,B9J08_001448,B9J08_001467,B9J08_001847,B9J08_002349,B9J08_002457,B9J08_002737,B9J08_002781,B9J08_002817,B9J08_002852,B9J08_003026,B9J08_003185,B9J08_003186,B9J08_003224,B9J08_003345,B9J08_003631,B9J08_003665,B9J08_003722,B9J08_003730,B9J08_003737,B9J08_004095,B9J08_004352,B9J08_004587,B9J08_004943,B9J08_005…	6	2.23	2.79	3.30163e-06	0.000121443	0.00279318
GO:1901362	organic cyclic compound biosynthetic process	483	25	B9J08_000261,B9J08_000367,B9J08_000382,B9J08_000920,B9J08_001161,B9J08_001266,B9J08_001448,B9J08_001847,B9J08_002349,B9J08_002817,B9J08_002852,B9J08_003026,B9J08_003224,B9J08_003345,B9J08_003665,B9J08_003730,B9J08_003737,B9J08_003738,B9J08_004222,B9J08_004587,B9J08_004742,B9J08_004943,B9J08_004982,B9J08_005101,B9J08_005340,	5.2	1.92	2.21	0.000886465	0.0312479	0.74995
GO:0006637	acyl-CoA metabolic process	22	4	B9J08_001266,B9J08_003185,B9J08_003186,B9J08_003224,	18.2	6.75	8.26	0.00251504	0.0818355	1
GO:0035383	thioester metabolic process	22	4	B9J08_001266,B9J08_003185,B9J08_003186,B9J08_003224,	18.2	6.75	8.26	0.00251504	0.0818355	1
GO:0006790	sulfur compound metabolic process	116	9	B9J08_000382,B9J08_001224,B9J08_001266,B9J08_001467,B9J08_003185,B9J08_003186,B9J08_003224,B9J08_004088,B9J08_004352,	7.8	2.88	3.2	0.00375405	0.117439	1
GO:0019287	isopentenyl diphosphate biosynthetic process, mevalonate pathway	4	2	B9J08_001266,B9J08_003224,	50	18.57	36.71	0.0041645	0.117439	1
GO:0009240	isopentenyl diphosphate biosynthetic process	4	2	B9J08_001266,B9J08_003224,	50	18.57	36.71	0.0041645	0.117439	1
GO:0046490	isopentenyl diphosphate metabolic process	4	2	B9J08_001266,B9J08_003224,	50	18.57	36.71	0.0041645	0.117439	1
GO:0006639	acylglycerol metabolic process	13	3	B9J08_002361,B9J08_004096,B9J08_004352,	23.1	8.57	11.08	0.0044726	0.118244	1
GO:0006641	triglyceride metabolic process	13	3	B9J08_002361,B9J08_004096,B9J08_004352,	23.1	8.57	11.08	0.0044726	0.118244	1
GO:0034032	purine nucleoside bisphosphate metabolic process	27	4	B9J08_001266,B9J08_003185,B9J08_003186,B9J08_003224,	14.8	5.5	6.46	0.00543883	0.131165	1
GO:0033875	ribonucleoside bisphosphate metabolic process	27	4	B9J08_001266,B9J08_003185,B9J08_003186,B9J08_003224,	14.8	5.5	6.46	0.00543883	0.131165	1
GO:0033865	nucleoside bisphosphate metabolic process	27	4	B9J08_001266,B9J08_003185,B9J08_003186,B9J08_003224,	14.8	5.5	6.46	0.00543883	0.131165	1
GO:0006638	neutral lipid metabolic process	14	3	B9J08_002361,B9J08_004096,B9J08_004352,	21.4	7.96	10.07	0.00558147	0.131165	1
GO:0016042	lipid catabolic process	44	5	B9J08_002361,B9J08_003185,B9J08_003486,B9J08_004096,B9J08_004111,	11.4	4.22	4.78	0.00611867	0.139903	1
GO:0015696	ammonium transport	5	2	B9J08_002630,B9J08_002831,	40	14.86	24.47	0.00681869	0.151806	1
GO:0032787	monocarboxylic acid metabolic process	131	9	B9J08_000367,B9J08_000491,B9J08_002737,B9J08_002781,B9J08_003185,B9J08_003737,B9J08_004095,B9J08_005101,B9J08_005230,	6.9	2.55	2.79	0.00830374	0.180127	1
GO:0046464	acylglycerol catabolic process	6	2	B9J08_002361,B9J08_004096,	33.3	12.38	18.35	0.0100484	0.207341	1
GO:0019433	triglyceride catabolic process	6	2	B9J08_002361,B9J08_004096,	33.3	12.38	18.35	0.0100484	0.207341	1
GO:0044242	cellular lipid catabolic process	34	4	B9J08_002361,B9J08_003185,B9J08_003486,B9J08_004096,	11.8	4.37	4.94	0.0124365	0.250506	1
GO:0006782	protoporphyrinogen IX biosynthetic process	7	2	B9J08_001161,B9J08_003738,	28.6	10.61	14.67	0.0138213	0.25984	1
GO:0046501	protoporphyrinogen IX metabolic process	7	2	B9J08_001161,B9J08_003738,	28.6	10.61	14.67	0.0138213	0.25984	1
GO:0046461	neutral lipid catabolic process	7	2	B9J08_002361,B9J08_004096,	28.6	10.61	14.67	0.0138213	0.25984	1
GO:0019740	nitrogen utilization	8	2	B9J08_002630,B9J08_002831,	25	9.29	12.23	0.0181062	0.303692	1
GO:0072521	purine-containing compound metabolic process	102	7	B9J08_000382,B9J08_001266,B9J08_003185,B9J08_003186,B9J08_003224,B9J08_003665,B9J08_004352,	6.9	2.55	2.76	0.0193233	0.303692	1
GO:0015914	phospholipid transport	22	3	B9J08_002485,B9J08_004048,B9J08_004982,	13.6	5.06	5.82	0.0201926	0.303692	1
GO:0042278	purine nucleoside metabolic process	9	2	B9J08_003665,B9J08_004352,	22.2	8.25	10.48	0.0228732	0.303692	1
GO:0006631	fatty acid metabolic process	61	5	B9J08_000367,B9J08_002781,B9J08_003185,B9J08_003737,B9J08_005230,	8.2	3.04	3.32	0.0233531	0.303692	1
GO:0006540	glutamate decarboxylation to succinate	1	1	B9J08_002737,	100	37.14	inf	0.0269231	0.303692	1
GO:1901032	negative regulation of response to reactive oxygen species	1	1	B9J08_004088,	100	37.14	inf	0.0269231	0.303692	1
GO:1903202	negative regulation of oxidative stress-induced cell death	1	1	B9J08_004088,	100	37.14	inf	0.0269231	0.303692	1
GO:1901710	regulation of homoserine biosynthetic process	1	1	B9J08_001031,	100	37.14	inf	0.0269231	0.303692	1
GO:1903206	negative regulation of hydrogen peroxide-induced cell death	1	1	B9J08_004088,	100	37.14	inf	0.0269231	0.303692	1
GO:0098763	mitotic cell cycle phase	1	1	B9J08_002848,	100	37.14	inf	0.0269231	0.303692	1
GO:0018160	peptidyl-pyrromethane cofactor linkage	1	1	B9J08_003738,	100	37.14	inf	0.0269231	0.303692	1
GO:1904406	negative regulation of nitric oxide metabolic process	1	1	B9J08_004088,	100	37.14	inf	0.0269231	0.303692	1
GO:0000087	mitotic M phase	1	1	B9J08_002848,	100	37.14	inf	0.0269231	0.303692	1
GO:0042632	cholesterol homeostasis	1	1	B9J08_003344,	100	37.14	inf	0.0269231	0.303692	1
GO:1902883	negative regulation of response to oxidative stress	1	1	B9J08_004088,	100	37.14	inf	0.0269231	0.303692	1
GO:1901299	negative regulation of hydrogen peroxide-mediated programmed cell death	1	1	B9J08_004088,	100	37.14	inf	0.0269231	0.303692	1
GO:0000279	M phase	1	1	B9J08_002848,	100	37.14	inf	0.0269231	0.303692	1
GO:0045019	negative regulation of nitric oxide biosynthetic process	1	1	B9J08_004088,	100	37.14	inf	0.0269231	0.303692	1
GO:0001919	regulation of receptor recycling	1	1	B9J08_003344,	100	37.14	inf	0.0269231	0.303692	1
GO:0043419	urea catabolic process	1	1	B9J08_002457,	100	37.14	inf	0.0269231	0.303692	1
GO:0019510	S-adenosylhomocysteine catabolic process	1	1	B9J08_004352,	100	37.14	inf	0.0269231	0.303692	1
GO:0007040	lysosome organization	1	1	B9J08_003344,	100	37.14	inf	0.0269231	0.303692	1
GO:0010509	polyamine homeostasis	1	1	B9J08_005403,	100	37.14	inf	0.0269231	0.303692	1
GO:0022403	cell cycle phase	1	1	B9J08_002848,	100	37.14	inf	0.0269231	0.303692	1
GO:0080171	lytic vacuole organization	1	1	B9J08_003344,	100	37.14	inf	0.0269231	0.303692	1
GO:0018198	peptidyl-cysteine modification	1	1	B9J08_003738,	100	37.14	inf	0.0269231	0.303692	1
GO:0015893	drug transport	1	1	B9J08_003981,	100	37.14	inf	0.0269231	0.303692	1
GO:0007166	cell surface receptor signaling pathway	1	1	B9J08_002485,	100	37.14	inf	0.0269231	0.303692	1
GO:0044848	biological phase	1	1	B9J08_002848,	100	37.14	inf	0.0269231	0.303692	1
GO:0046503	glycerolipid catabolic process	10	2	B9J08_002361,B9J08_004096,	20	7.43	9.17	0.0280938	0.312728	1
GO:0046148	pigment biosynthetic process	27	3	B9J08_000382,B9J08_001161,B9J08_003738,	11.1	4.13	4.6	0.0348079	0.382435	1
GO:0006633	fatty acid biosynthetic process	29	3	B9J08_000367,B9J08_003737,B9J08_005230,	10.3	3.84	4.25	0.0418364	0.423831	1
GO:0042440	pigment metabolic process	29	3	B9J08_000382,B9J08_001161,B9J08_003738,	10.3	3.84	4.25	0.0418364	0.423831	1
GO:0032259	methylation	95	6	B9J08_000382,B9J08_001448,B9J08_003322,B9J08_003631,B9J08_005340,B9J08_005369,	6.3	2.35	2.51	0.0419128	0.423831	1
GO:0006744	ubiquinone biosynthetic process	13	2	B9J08_003631,B9J08_005369,	15.4	5.71	6.66	0.0462074	0.423831	1
GO:0009119	ribonucleoside metabolic process	13	2	B9J08_003665,B9J08_004352,	15.4	5.71	6.66	0.0462074	0.423831	1
GO:0046470	phosphatidylcholine metabolic process	13	2	B9J08_003486,B9J08_004352,	15.4	5.71	6.66	0.0462074	0.423831	1
GO:0006743	ubiquinone metabolic process	13	2	B9J08_003631,B9J08_005369,	15.4	5.71	6.66	0.0462074	0.423831	1
GO:0006644	phospholipid metabolic process	124	7	B9J08_001266,B9J08_002361,B9J08_003224,B9J08_003486,B9J08_004048,B9J08_004352,B9J08_004982,	5.6	2.1	2.23	0.0486908	0.423831	1
Molecular function
ID	Name	Bgd count	Result count	Result gene list	Pct of bgd	Fold enrichment	Odds ratio	P-value	Benjamini	Bonferroni
GO:0046906	tetrapyrrole binding	35	11	B9J08_000491,B9J08_001224,B9J08_001448,B9J08_001515,B9J08_001847,B9J08_002349,B9J08_002366,B9J08_002668,B9J08_004161,B9J08_004478,B9J08_004742,	31.4	11.67	18.05	8.38813e-10	1.35888e-07	2.71775e-07
GO:0020037	heme binding	35	11	B9J08_000491,B9J08_001224,B9J08_001448,B9J08_001515,B9J08_001847,B9J08_002349,B9J08_002366,B9J08_002668,B9J08_004161,B9J08_004478,B9J08_004742,	31.4	11.67	18.05	8.38813e-10	1.35888e-07	2.71775e-07
GO:0005506	iron ion binding	47	12	B9J08_000367,B9J08_000705,B9J08_001224,B9J08_001448,B9J08_001515,B9J08_002349,B9J08_002668,B9J08_003737,B9J08_004161,B9J08_004478,B9J08_005101,B9J08_005230,	25.5	9.48	13.59	2.01403e-09	2.17515e-07	6.52546e-07
GO:0004497	monooxygenase activity	27	9	B9J08_000261,B9J08_000367,B9J08_001448,B9J08_001515,B9J08_002349,B9J08_002668,B9J08_003709,B9J08_004161,B9J08_004478,	33.3	12.38	19.38	1.73858e-08	1.40825e-06	5.63299e-06
GO:0016705	oxidoreductase activity, acting on paired donors, with incorporation or reduction of molecular oxygen	43	10	B9J08_000261,B9J08_000367,B9J08_001448,B9J08_001515,B9J08_002349,B9J08_002668,B9J08_003709,B9J08_003737,B9J08_004161,B9J08_004478,	23.3	8.64	11.81	1.26373e-07	8.18895e-06	4.09448e-05
GO:0016491	oxidoreductase activity	360	28	B9J08_000261,B9J08_000367,B9J08_000491,B9J08_000705,B9J08_000844,B9J08_000920,B9J08_001161,B9J08_001224,B9J08_001448,B9J08_001515,B9J08_001733,B9J08_002349,B9J08_002361,B9J08_002366,B9J08_002668,B9J08_002737,B9J08_002852,B9J08_003026,B9J08_003224,B9J08_003709,B9J08_003737,B9J08_004088,B9J08_004161,B9J08_004478,B9J08_004656,B9J08_004742,B9J08_005101,B9J08_005230,	7.8	2.89	3.63	1.73397e-07	9.36343e-06	5.61806e-05
GO:0046872	metal ion binding	617	34	B9J08_000175,B9J08_000270,B9J08_000341,B9J08_000367,B9J08_000382,B9J08_000491,B9J08_000705,B9J08_000791,B9J08_000901,B9J08_000967,B9J08_001224,B9J08_001292,B9J08_001448,B9J08_001467,B9J08_001515,B9J08_002057,B9J08_002136,B9J08_002349,B9J08_002366,B9J08_002457,B9J08_002463,B9J08_002668,B9J08_002853,B9J08_003322,B9J08_003737,B9J08_004088,B9J08_004161,B9J08_004222,B9J08_004421,B9J08_004478,B9J08_004…	5.5	2.05	2.52	2.15126e-05	0.000995728	0.0069701
GO:0043169	cation binding	627	34	B9J08_000175,B9J08_000270,B9J08_000341,B9J08_000367,B9J08_000382,B9J08_000491,B9J08_000705,B9J08_000791,B9J08_000901,B9J08_000967,B9J08_001224,B9J08_001292,B9J08_001448,B9J08_001467,B9J08_001515,B9J08_002057,B9J08_002136,B9J08_002349,B9J08_002366,B9J08_002457,B9J08_002463,B9J08_002668,B9J08_002853,B9J08_003322,B9J08_003737,B9J08_004088,B9J08_004161,B9J08_004222,B9J08_004421,B9J08_004478,B9J08_004…	5.4	2.01	2.47	3.03447e-05	0.00116139	0.00983168
GO:0016712	oxidoreductase activity, acting on paired donors, with incorporation or reduction of molecular oxygen, reduced flavin or flavoprotein as one donor, and incorporation of one atom of oxygen	8	4	B9J08_001515,B9J08_002668,B9J08_004161,B9J08_004478,	50	18.57	37.3	3.22608e-05	0.00116139	0.0104525
GO:0009055	electron transfer activity	63	9	B9J08_000705,B9J08_001448,B9J08_001515,B9J08_002349,B9J08_002668,B9J08_004088,B9J08_004161,B9J08_004478,B9J08_004742,	14.3	5.31	6.41	3.87015e-05	0.00123797	0.0125393
GO:0046914	transition metal ion binding	349	23	B9J08_000270,B9J08_000341,B9J08_000367,B9J08_000382,B9J08_000705,B9J08_000791,B9J08_000967,B9J08_001224,B9J08_001448,B9J08_001515,B9J08_002057,B9J08_002136,B9J08_002349,B9J08_002668,B9J08_002853,B9J08_003322,B9J08_003737,B9J08_004161,B9J08_004222,B9J08_004421,B9J08_004478,B9J08_005101,B9J08_005230,	6.6	2.45	2.9	4.203e-05	0.00123797	0.0136177
GO:0016709	oxidoreductase activity, acting on paired donors, with incorporation or reduction of molecular oxygen, NAD(P)H as one donor, and incorporation of one atom of oxygen	10	4	B9J08_000261,B9J08_000367,B9J08_001448,B9J08_003709,	40	14.86	24.85	9.27973e-05	0.00250553	0.0300663
GO:0005199	structural constituent of cell wall	5	3	B9J08_002560,B9J08_003910,B9J08_004200,	60	22.29	55.51	0.00018321	0.00456616	0.0593601
GO:0008169	C-methyltransferase activity	6	3	B9J08_003631,B9J08_005340,B9J08_005369,	50	18.57	37	0.00035921	0.00831315	0.116384
GO:0030580	quinone cofactor methyltransferase activity	2	2	B9J08_003631,B9J08_005369,	100	37.14	inf	0.000719253	0.0137081	0.233038
GO:0070704	sterol desaturase activity	2	2	B9J08_002349,B9J08_003737,	100	37.14	inf	0.000719253	0.0137081	0.233038
GO:0008425	2-polyprenyl-6-methoxy-1,4-benzoquinone methyltransferase activity	2	2	B9J08_003631,B9J08_005369,	100	37.14	inf	0.000719253	0.0137081	0.233038
GO:0047617	acyl-CoA hydrolase activity	3	2	B9J08_003185,B9J08_003186,	66.7	24.76	73.44	0.00211963	0.0361452	0.68676
GO:0019206	nucleoside kinase activity	3	2	B9J08_003665,B9J08_005086,	66.7	24.76	73.44	0.00211963	0.0361452	0.68676
GO:0005548	phospholipid transporter activity	11	3	B9J08_002485,B9J08_004048,B9J08_004982,	27.3	10.13	13.86	0.00268413	0.0434829	0.869658
GO:0016298	lipase activity	38	5	B9J08_002361,B9J08_002560,B9J08_003486,B9J08_004096,B9J08_004111,	13.2	4.89	5.66	0.00321559	0.049612	1
GO:0008526	phosphatidylinositol transfer activity	4	2	B9J08_004048,B9J08_004982,	50	18.57	36.71	0.0041645	0.0613317	1
GO:0008519	ammonium transmembrane transporter activity	5	2	B9J08_002630,B9J08_002831,	40	14.86	24.47	0.00681869	0.0883703	1
GO:0120014	phospholipid transfer activity	5	2	B9J08_004048,B9J08_004982,	40	14.86	24.47	0.00681869	0.0883703	1
GO:0016289	CoA hydrolase activity	5	2	B9J08_003185,B9J08_003186,	40	14.86	24.47	0.00681869	0.0883703	1
GO:0016627	oxidoreductase activity, acting on the CH-CH group of donors	30	4	B9J08_001161,B9J08_002852,B9J08_003026,B9J08_004656,	13.3	4.95	5.71	0.00798155	0.0994623	1
GO:0003824	catalytic activity	2100	70	B9J08_000244,B9J08_000261,B9J08_000367,B9J08_000382,B9J08_000389,B9J08_000491,B9J08_000509,B9J08_000705,B9J08_000844,B9J08_000901,B9J08_000920,B9J08_001031,B9J08_001161,B9J08_001224,B9J08_001266,B9J08_001448,B9J08_001467,B9J08_001515,B9J08_001532,B9J08_001733,B9J08_001958,B9J08_002349,B9J08_002361,B9J08_002366,B9J08_002457,B9J08_002463,B9J08_002560,B9J08_002638,B9J08_002668,B9J08_002737,B9J08_002…	3.3	1.24	1.55	0.00946368	0.107692	1
GO:0016717	oxidoreductase activity, acting on paired donors, with oxidation of a pair of donors resulting in the reduction of molecular oxygen to two molecules of water	6	2	B9J08_002349,B9J08_003737,	33.3	12.38	18.35	0.0100484	0.107692	1
GO:0016765	transferase activity, transferring alkyl or aryl (other than methyl) groups	35	4	B9J08_001467,B9J08_002638,B9J08_003738,B9J08_004587,	11.4	4.24	4.78	0.013755	0.107692	1
GO:0004806	triglyceride lipase activity	20	3	B9J08_002361,B9J08_004096,B9J08_004111,	15	5.57	6.51	0.0155419	0.107692	1
GO:0050661	NADP binding	21	3	B9J08_001224,B9J08_003224,B9J08_003709,	14.3	5.31	6.15	0.017782	0.107692	1
GO:0043167	ion binding	1241	44	B9J08_000175,B9J08_000261,B9J08_000270,B9J08_000341,B9J08_000367,B9J08_000382,B9J08_000491,B9J08_000705,B9J08_000791,B9J08_000901,B9J08_000967,B9J08_001224,B9J08_001266,B9J08_001292,B9J08_001448,B9J08_001467,B9J08_001515,B9J08_002057,B9J08_002136,B9J08_002349,B9J08_002366,B9J08_002401,B9J08_002457,B9J08_002463,B9J08_002668,B9J08_002853,B9J08_003262,B9J08_003322,B9J08_003361,B9J08_003709,B9J08_003…	3.5	1.32	1.5	0.0215709	0.107692	1
GO:0005319	lipid transporter activity	24	3	B9J08_002485,B9J08_004048,B9J08_004982,	12.5	4.64	5.26	0.025527	0.107692	1
GO:0015244	fluconazole transmembrane transporter activity	1	1	B9J08_003981,	100	37.14	inf	0.0269231	0.107692	1
GO:0016802	trialkylsulfonium hydrolase activity	1	1	B9J08_004352,	100	37.14	inf	0.0269231	0.107692	1
GO:0034038	deoxyhypusine synthase activity	1	1	B9J08_002638,	100	37.14	inf	0.0269231	0.107692	1
GO:0043333	2-octaprenyl-6-methoxy-1,4-benzoquinone methylase activity	1	1	B9J08_003631,	100	37.14	inf	0.0269231	0.107692	1
GO:0043334	2-hexaprenyl-6-methoxy-1,4-benzoquinone methyltransferase activity	1	1	B9J08_003631,	100	37.14	inf	0.0269231	0.107692	1
GO:0000247	C-8 sterol isomerase activity	1	1	B9J08_004943,	100	37.14	inf	0.0269231	0.107692	1
GO:0061542	3-demethylubiquinol-n 3-O-methyltransferase activity	1	1	B9J08_005369,	100	37.14	inf	0.0269231	0.107692	1
GO:0000254	C-4 methylsterol oxidase activity	1	1	B9J08_000367,	100	37.14	inf	0.0269231	0.107692	1
GO:0003985	acetyl-CoA C-acetyltransferase activity	1	1	B9J08_003730,	100	37.14	inf	0.0269231	0.107692	1
GO:0046557	glucan endo-1,6-beta-glucosidase activity	1	1	B9J08_003251,	100	37.14	inf	0.0269231	0.107692	1
GO:0004395	hexaprenyldihydroxybenzoate methyltransferase activity	1	1	B9J08_005369,	100	37.14	inf	0.0269231	0.107692	1
GO:0004418	hydroxymethylbilane synthase activity	1	1	B9J08_003738,	100	37.14	inf	0.0269231	0.107692	1
GO:0050613	delta14-sterol reductase activity	1	1	B9J08_003026,	100	37.14	inf	0.0269231	0.107692	1
GO:0004460	L-lactate dehydrogenase (cytochrome) activity	1	1	B9J08_000491,	100	37.14	inf	0.0269231	0.107692	1
GO:0042085	5-methyltetrahydropteroyltri-L-glutamate-dependent methyltransferase activity	1	1	B9J08_000382,	100	37.14	inf	0.0269231	0.107692	1
GO:0000248	C-5 sterol desaturase activity	1	1	B9J08_003737,	100	37.14	inf	0.0269231	0.107692	1
GO:0000334	3-hydroxyanthranilate 3,4-dioxygenase activity	1	1	B9J08_005101,	100	37.14	inf	0.0269231	0.107692	1
GO:0004506	squalene monooxygenase activity	1	1	B9J08_000261,	100	37.14	inf	0.0269231	0.107692	1
GO:0015292	uniporter activity	1	1	B9J08_004633,	100	37.14	inf	0.0269231	0.107692	1
GO:0003838	sterol 24-C-methyltransferase activity	1	1	B9J08_005340,	100	37.14	inf	0.0269231	0.107692	1
GO:0003871	5-methyltetrahydropteroyltriglutamate-homocysteine S-methyltransferase activity	1	1	B9J08_000382,	100	37.14	inf	0.0269231	0.107692	1
GO:0004130	cytochrome-c peroxidase activity	1	1	B9J08_002366,	100	37.14	inf	0.0269231	0.107692	1
GO:0004310	farnesyl-diphosphate farnesyltransferase activity	1	1	B9J08_004587,	100	37.14	inf	0.0269231	0.107692	1
GO:0008398	sterol 14-demethylase activity	1	1	B9J08_001448,	100	37.14	inf	0.0269231	0.107692	1
GO:0033204	ribonuclease P RNA binding	1	1	B9J08_004991,	100	37.14	inf	0.0269231	0.107692	1
GO:0042084	5-methyltetrahydrofolate-dependent methyltransferase activity	1	1	B9J08_000382,	100	37.14	inf	0.0269231	0.107692	1
GO:0000140	acylglycerone-phosphate reductase activity	1	1	B9J08_002361,	100	37.14	inf	0.0269231	0.107692	1
GO:0000246	delta24(24-1) sterol reductase activity	1	1	B9J08_002852,	100	37.14	inf	0.0269231	0.107692	1
GO:0000249	C-22 sterol desaturase activity	1	1	B9J08_002349,	100	37.14	inf	0.0269231	0.107692	1
GO:0000252	C-3 sterol dehydrogenase (C-4 sterol decarboxylase) activity	1	1	B9J08_000920,	100	37.14	inf	0.0269231	0.107692	1
GO:0004013	adenosylhomocysteinase activity	1	1	B9J08_004352,	100	37.14	inf	0.0269231	0.107692	1
GO:0004109	coproporphyrinogen oxidase activity	1	1	B9J08_001161,	100	37.14	inf	0.0269231	0.107692	1
GO:0004163	diphosphomevalonate decarboxylase activity	1	1	B9J08_001266,	100	37.14	inf	0.0269231	0.107692	1
GO:0004478	methionine adenosyltransferase activity	1	1	B9J08_001467,	100	37.14	inf	0.0269231	0.107692	1
GO:0061543	3-demethylubiquinol-6 3-O-methyltransferase activity	1	1	B9J08_005369,	100	37.14	inf	0.0269231	0.107692	1
GO:0004847	urea carboxylase activity	1	1	B9J08_002457,	100	37.14	inf	0.0269231	0.107692	1
GO:0008705	methionine synthase activity	1	1	B9J08_000382,	100	37.14	inf	0.0269231	0.107692	1
GO:0010420	3,4-dihydroxy-5-polyprenylbenzoic acid O-methyltransferase activity	1	1	B9J08_005369,	100	37.14	inf	0.0269231	0.107692	1
GO:0016453	C-acetyltransferase activity	1	1	B9J08_003730,	100	37.14	inf	0.0269231	0.107692	1
GO:0031956	medium-chain fatty acid-CoA ligase activity	1	1	B9J08_002781,	100	37.14	inf	0.0269231	0.107692	1
GO:0033764	steroid dehydrogenase activity, acting on the CH-OH group of donors, NAD or NADP as acceptor	1	1	B9J08_000920,	100	37.14	inf	0.0269231	0.107692	1
GO:0008689	3-demethylubiquinone-9 3-O-methyltransferase activity	1	1	B9J08_005369,	100	37.14	inf	0.0269231	0.107692	1
GO:0004592	pantoate-beta-alanine ligase activity	1	1	B9J08_004095,	100	37.14	inf	0.0269231	0.107692	1
GO:0003854	3-beta-hydroxy-delta5-steroid dehydrogenase activity	1	1	B9J08_000920,	100	37.14	inf	0.0269231	0.107692	1
GO:0051996	squalene synthase activity	1	1	B9J08_004587,	100	37.14	inf	0.0269231	0.107692	1
GO:0004001	adenosine kinase activity	1	1	B9J08_003665,	100	37.14	inf	0.0269231	0.107692	1
GO:0004039	allophanate hydrolase activity	1	1	B9J08_002457,	100	37.14	inf	0.0269231	0.107692	1
GO:0004420	hydroxymethylglutaryl-CoA reductase (NADPH) activity	1	1	B9J08_003224,	100	37.14	inf	0.0269231	0.107692	1
GO:0016790	thiolester hydrolase activity	10	2	B9J08_003185,B9J08_003186,	20	7.43	9.17	0.0280938	0.111005	1
GO:0016628	oxidoreductase activity, acting on the CH-CH group of donors, NAD or NADP as acceptor	11	2	B9J08_002852,B9J08_003026,	18.2	6.75	8.15	0.0337403	0.131709	1
GO:0120013	lipid transfer activity	13	2	B9J08_004048,B9J08_004982,	15.4	5.71	6.66	0.0462074	0.177455	1
GO:0052689	carboxylic ester hydrolase activity	51	4	B9J08_002361,B9J08_003486,B9J08_004096,B9J08_004111,	7.8	2.91	3.14	0.0473423	0.177455	1
Cellular component
ID	Name	Bgd count	Result count	Result gene list	Pct of bgd	Fold enrichment	Odds ratio	P-value	Benjamini	Bonferroni
GO:0016020	membrane	1545	55	B9J08_000175,B9J08_000211,B9J08_000261,B9J08_000270,B9J08_000367,B9J08_000512,B9J08_000582,B9J08_000597,B9J08_000919,B9J08_000920,B9J08_000987,B9J08_001080,B9J08_001448,B9J08_001515,B9J08_001958,B9J08_002258,B9J08_002297,B9J08_002366,B9J08_002401,B9J08_002463,B9J08_002485,B9J08_002486,B9J08_002630,B9J08_002643,B9J08_002659,B9J08_002817,B9J08_002831,B9J08_002852,B9J08_003026,B9J08_003224,B9J08_003…	3.6	1.32	1.59	0.00743211	0.277708	1
GO:0031224	intrinsic component of membrane	1070	41	B9J08_000175,B9J08_000211,B9J08_000261,B9J08_000512,B9J08_000582,B9J08_000597,B9J08_000919,B9J08_001080,B9J08_001448,B9J08_001515,B9J08_001958,B9J08_002258,B9J08_002297,B9J08_002366,B9J08_002401,B9J08_002463,B9J08_002485,B9J08_002486,B9J08_002630,B9J08_002659,B9J08_002817,B9J08_002831,B9J08_002852,B9J08_003026,B9J08_003224,B9J08_003710,B9J08_003737,B9J08_003981,B9J08_004050,B9J08_004478,B9J08_004…	3.8	1.42	1.65	0.0074639	0.277708	1
GO:0005783	endoplasmic reticulum	309	16	B9J08_000261,B9J08_000367,B9J08_000920,B9J08_001448,B9J08_002361,B9J08_002485,B9J08_002817,B9J08_002852,B9J08_003224,B9J08_003486,B9J08_003737,B9J08_004048,B9J08_004587,B9J08_004742,B9J08_004943,B9J08_005340,	5.2	1.92	2.12	0.00815748	0.277708	1
GO:0016021	integral component of membrane	1053	40	B9J08_000175,B9J08_000211,B9J08_000261,B9J08_000512,B9J08_000582,B9J08_000597,B9J08_000919,B9J08_001080,B9J08_001448,B9J08_001515,B9J08_002258,B9J08_002297,B9J08_002366,B9J08_002401,B9J08_002463,B9J08_002485,B9J08_002486,B9J08_002630,B9J08_002659,B9J08_002817,B9J08_002831,B9J08_002852,B9J08_003026,B9J08_003224,B9J08_003710,B9J08_003737,B9J08_003981,B9J08_004050,B9J08_004478,B9J08_004537,B9J08_004…	3.8	1.41	1.63	0.00972089	0.277708	1
GO:0005811	lipid droplet	39	4	B9J08_000261,B9J08_002361,B9J08_004982,B9J08_005340,	10.3	3.81	4.23	0.0199025	0.277708	1
GO:0018995	host cellular component	103	7	B9J08_000270,B9J08_000791,B9J08_002057,B9J08_002136,B9J08_002853,B9J08_004222,B9J08_004421,	6.8	2.52	2.73	0.0202821	0.277708	1
GO:0042025	host cell nucleus	103	7	B9J08_000270,B9J08_000791,B9J08_002057,B9J08_002136,B9J08_002853,B9J08_004222,B9J08_004421,	6.8	2.52	2.73	0.0202821	0.277708	1
GO:0033643	host cell part	103	7	B9J08_000270,B9J08_000791,B9J08_002057,B9J08_002136,B9J08_002853,B9J08_004222,B9J08_004421,	6.8	2.52	2.73	0.0202821	0.277708	1
GO:0033648	host intracellular membrane-bounded organelle	103	7	B9J08_000270,B9J08_000791,B9J08_002057,B9J08_002136,B9J08_002853,B9J08_004222,B9J08_004421,	6.8	2.52	2.73	0.0202821	0.277708	1
GO:0033646	host intracellular part	103	7	B9J08_000270,B9J08_000791,B9J08_002057,B9J08_002136,B9J08_002853,B9J08_004222,B9J08_004421,	6.8	2.52	2.73	0.0202821	0.277708	1
GO:0043657	host cell	103	7	B9J08_000270,B9J08_000791,B9J08_002057,B9J08_002136,B9J08_002853,B9J08_004222,B9J08_004421,	6.8	2.52	2.73	0.0202821	0.277708	1
GO:0033647	host intracellular organelle	103	7	B9J08_000270,B9J08_000791,B9J08_002057,B9J08_002136,B9J08_002853,B9J08_004222,B9J08_004421,	6.8	2.52	2.73	0.0202821	0.277708	1
GO:0043656	host intracellular region	103	7	B9J08_000270,B9J08_000791,B9J08_002057,B9J08_002136,B9J08_002853,B9J08_004222,B9J08_004421,	6.8	2.52	2.73	0.0202821	0.277708	1
GO:0071597	cellular birth scar	1	1	B9J08_004200,	100	37.14	inf	0.0269231	0.2819	1
GO:0071986	Ragulator complex	1	1	B9J08_003344,	100	37.14	inf	0.0269231	0.2819	1
GO:0070057	prospore membrane spindle pole body attachment site	1	1	B9J08_002401,	100	37.14	inf	0.0269231	0.2819	1
GO:0070056	prospore membrane leading edge	1	1	B9J08_002401,	100	37.14	inf	0.0269231	0.2819	1
GO:0005618	cell wall	45	4	B9J08_002560,B9J08_003251,B9J08_003910,B9J08_004200,	8.9	3.3	3.61	0.0318893	0.315349	1
GO:0030312	external encapsulating structure	46	4	B9J08_002560,B9J08_003251,B9J08_003910,B9J08_004200,	8.7	3.23	3.52	0.0342216	0.320602	1
GO:0005886	plasma membrane	224	11	B9J08_000367,B9J08_000987,B9J08_001080,B9J08_001958,B9J08_002401,B9J08_002485,B9J08_002831,B9J08_003486,B9J08_003981,B9J08_004048,B9J08_005403,	4.9	1.82	1.95	0.037702	0.335547	1
KEGG
ID	Name	Bgd count	Result count	Result gene list	Pct of bgd	Fold enrichment	Odds ratio	P-value	Benjamini	Bonferroni
ec00100__PK__KEGG	Steroid biosynthesis	24	10	B9J08_000261,B9J08_000367,B9J08_000920,B9J08_001448,B9J08_002349,B9J08_002852,B9J08_003026,B9J08_003737,B9J08_004587,B9J08_005340,	41.7	10.51	20.32	5.97535e-09	7.8277e-07	7.8277e-07
ec00232__PK__KEGG	Caffeine metabolism	12	6	B9J08_001448,B9J08_001515,B9J08_002349,B9J08_002668,B9J08_004161,B9J08_004478,	50	12.61	26.62	2.35901e-06	0.000154515	0.000309031
ec00363__PK__KEGG	Bisphenol degradation	65	12	B9J08_000389,B9J08_001292,B9J08_001448,B9J08_001733,B9J08_002349,B9J08_002560,B9J08_003015,B9J08_003464,B9J08_003709,B9J08_003737,B9J08_004096,B9J08_004656,	18.5	4.66	6.52	4.145e-06	0.000180998	0.000542995
ec00140__PK__KEGG	Steroid hormone biosynthesis	42	9	B9J08_000920,B9J08_001448,B9J08_001515,B9J08_001733,B9J08_002349,B9J08_002361,B9J08_002668,B9J08_004161,B9J08_004478,	21.4	5.4	7.52	2.17245e-05	0.000711478	0.00284591
ec00071__PK__KEGG	Fatty acid degradation	55	10	B9J08_001448,B9J08_001515,B9J08_002349,B9J08_002668,B9J08_002737,B9J08_002781,B9J08_003730,B9J08_004161,B9J08_004478,B9J08_004656,	18.2	4.59	6.19	3.37253e-05	0.000883604	0.00441802
ec00901__PK__KEGG	Indole alkaloid biosynthesis	12	5	B9J08_002349,B9J08_002668,B9J08_003737,B9J08_004478,B9J08_004656,	41.7	10.51	18.68	5.3587e-05	0.00116998	0.0070199
ec00830__PK__KEGG	Retinol metabolism	71	11	B9J08_001448,B9J08_001515,B9J08_001733,B9J08_002349,B9J08_002560,B9J08_002668,B9J08_003015,B9J08_003464,B9J08_004096,B9J08_004161,B9J08_004478,	15.5	3.91	5.15	6.29092e-05	0.0011773	0.00824111
ec00905__PK__KEGG	Brassinosteroid biosynthesis	10	4	B9J08_001292,B9J08_001448,B9J08_002349,B9J08_003737,	40	10.09	17.16	0.000395139	0.00613895	0.0517632
ec00591__PK__KEGG	Linoleic acid metabolism	37	7	B9J08_001448,B9J08_001515,B9J08_001733,B9J08_002349,B9J08_002668,B9J08_004161,B9J08_004478,	18.9	4.77	6.22	0.000444475	0.00613895	0.0582262
ec00130__PK__KEGG	Ubiquinone and other terpenoid-quinone biosynthesis	50	8	B9J08_001292,B9J08_001448,B9J08_002349,B9J08_002781,B9J08_003631,B9J08_003737,B9J08_004742,B9J08_005369,	16	4.04	5.13	0.000562345	0.00613895	0.0736672
ec00900__PK__KEGG	Terpenoid backbone biosynthesis	50	8	B9J08_001266,B9J08_002560,B9J08_003015,B9J08_003224,B9J08_003464,B9J08_003730,B9J08_004096,B9J08_004587,	16	4.04	5.13	0.000562345	0.00613895	0.0736672
ec00909__PK__KEGG	Sesquiterpenoid and triterpenoid biosynthesis	5	3	B9J08_000261,B9J08_001448,B9J08_004587,	60	15.13	38.07	0.000562347	0.00613895	0.0736674
ec00380__PK__KEGG	Tryptophan metabolism	150	14	B9J08_000901,B9J08_001292,B9J08_001448,B9J08_001515,B9J08_002349,B9J08_002366,B9J08_002668,B9J08_002737,B9J08_002892,B9J08_003730,B9J08_003737,B9J08_004161,B9J08_004478,B9J08_005101,	9.3	2.35	2.91	0.001539	0.0155084	0.201609
ec00361__PK__KEGG	Chlorocyclohexane and chlorobenzene degradation	34	6	B9J08_001292,B9J08_001448,B9J08_002349,B9J08_002668,B9J08_003737,B9J08_004478,	17.6	4.45	5.62	0.0017241	0.0161327	0.225857
ec00623__PK__KEGG	Toluene degradation	37	6	B9J08_002349,B9J08_002560,B9J08_003015,B9J08_003464,B9J08_003737,B9J08_004096,	16.2	4.09	5.07	0.00271383	0.0237008	0.355511
ec00590__PK__KEGG	Arachidonic acid metabolism	54	7	B9J08_001448,B9J08_001515,B9J08_001733,B9J08_002349,B9J08_002668,B9J08_004161,B9J08_004478,	13	3.27	3.93	0.00447686	0.0366543	0.586469
ec00980__PK__KEGG	Metabolism of xenobiotics by cytochrome P450	50	6	B9J08_001448,B9J08_001515,B9J08_002349,B9J08_002668,B9J08_004161,B9J08_004478,	12	3.03	3.54	0.0123756	0.095365	1
ec00365__PK__KEGG	Furfural degradation	38	5	B9J08_001733,B9J08_002560,B9J08_003015,B9J08_003464,B9J08_004096,	13.2	3.32	3.9	0.0152665	0.111106	1
ec00982__PK__KEGG	Drug metabolism - cytochrome P450	54	6	B9J08_001448,B9J08_001515,B9J08_002349,B9J08_002668,B9J08_004161,B9J08_004478,	11.1	2.8	3.24	0.0177661	0.122492	1
ec00053__PK__KEGG	Ascorbate and aldarate metabolism	104	9	B9J08_001292,B9J08_001448,B9J08_001733,B9J08_002366,B9J08_002560,B9J08_002737,B9J08_003015,B9J08_003464,B9J08_004096,	8.7	2.18	2.51	0.0188081	0.123193	1
ec00943__PK__KEGG	Isoflavonoid biosynthesis	6	2	B9J08_002349,B9J08_003737,	33.3	8.41	12.47	0.0209481	0.130676	1
ec00627__PK__KEGG	Aminobenzoate degradation	131	10	B9J08_000491,B9J08_001292,B9J08_001448,B9J08_001515,B9J08_002349,B9J08_002668,B9J08_002892,B9J08_003737,B9J08_004161,B9J08_004478,	7.6	1.93	2.19	0.0299643	0.178424	1
ec00981__PK__KEGG	Insect hormone biosynthesis	46	5	B9J08_000367,B9J08_001292,B9J08_001448,B9J08_001733,B9J08_002737,	10.9	2.74	3.12	0.0326813	0.186142	1
ec00983__PK__KEGG	Drug metabolism - other enzymes	63	6	B9J08_002349,B9J08_002366,B9J08_002668,B9J08_003026,B9J08_004478,B9J08_005086,	9.5	2.4	2.71	0.0353782	0.193106	1
ec00650__PK__KEGG	Butanoate metabolism	64	6	B9J08_001733,B9J08_002361,B9J08_002737,B9J08_003709,B9J08_003730,B9J08_004656,	9.4	2.36	2.66	0.0378515	0.198342	1
ec00999__PK__KEGG	Biosynthesis of various plant secondary metabolites	65	6	B9J08_001467,B9J08_002349,B9J08_002668,B9J08_002892,B9J08_003737,B9J08_004478,	9.2	2.33	2.61	0.040434	0.203725	1
ec00062__PK__KEGG	Fatty acid elongation	21	3	B9J08_003185,B9J08_003186,B9J08_003730,	14.3	3.6	4.19	0.0474955	0.230441	1
Species	Platform:	Type of genes	Criteria	Number of genes
C. auris	Candida Genome Database	downregulated	DEG; FC<-1.5	119
Biological process
GOID	GO_term	Cluster frequency	Background frequency	Corrected P-value	False discovery rate	Gene(s) annotated to the term	Directly Annotated GOID List
6412	translation	27 out of 119 genes, 22.7%	255 out of 5417 background genes, 4.7%	1.19e-09	0	B9J08_000091:B9J08_000102:B9J08_000200:B9J08_000328:B9J08_000425:B9J08_000461:B9J08_000604:B9J08_000698:B9J08_000771:B9J08_000955:B9J08_000965:B9J08_001278:B9J08_001460:B9J08_001822:B9J08_001885:B9J08_003216:B9J08_003238:B9J08_003432:B9J08_003433:B9J08_003582:B9J08_003634:B9J08_004067:B9J08_004147:B9J08_004999:B9J08_005005:B9J08_005099:B9J08_005150	70126:51083:6452:470:6364:70124:7131:288:2181:42149:6412:6413:6414:70125:32436:27:6415:32543:18188:42274:30490:6407:6418:6429:2000639:6450:2182:462:2183:372:54
9059	macromolecule biosynthetic process	47 out of 119 genes, 39.5%	1187 out of 5417 background genes, 21.9%	0.00324	0	B9J08_000091:B9J08_000102:B9J08_000200:B9J08_000207:B9J08_000328:B9J08_000425:B9J08_000461:B9J08_000476:B9J08_000604:B9J08_000698:B9J08_000771:B9J08_000955:B9J08_000965:B9J08_001134:B9J08_001278:B9J08_001365:B9J08_001420:B9J08_001460:B9J08_001474:B9J08_001822:B9J08_001885:B9J08_002000:B9J08_002225:B9J08_002819:B9J08_003021:B9J08_003154:B9J08_003216:B9J08_003238:B9J08_003432:B9J08_003433:B9J08_003…	398:61818:45943:51083:6269:6363:7131:51131:288:60258:6279:6413:723:6270:70125:8298:32436:55:27:30433:6281:463:1682:42274:34412:6429:42797:2000639:447:2182:6458:462:1902981:70880:492:70370:70124:42149:480:6260:34605:50821:742:70972:45048:51321:731:36498:31321:6450:7088:43335:43248:56:17148:54:70414:6396:6360:470:6457:1902626:2:34975:6383:35269:6414:466:32543:42780:31204:30490:6351:31048:51085:4202…
6458	'de novo' protein folding	4 out of 119 genes, 3.4%	8 out of 5417 background genes, 0.1%	0.00527	0	B9J08_000102:B9J08_000476:HSP60:B9J08_004701	51083:51131:6458:70370:42149:50821:6450:43335:54:70414:6457:2:34975:42026:51085:35617:6515:6452:51604:6364:2181:71218:9408:45041
10467	gene expression	41 out of 119 genes, 34.5%	1015 out of 5417 background genes, 18.7%	0.01053	0	B9J08_000091:B9J08_000102:B9J08_000200:B9J08_000207:B9J08_000328:B9J08_000425:B9J08_000461:B9J08_000476:B9J08_000604:B9J08_000698:B9J08_000771:B9J08_000955:B9J08_000965:B9J08_001134:B9J08_001278:B9J08_001365:B9J08_001460:B9J08_001822:B9J08_001885:B9J08_002000:B9J08_003021:B9J08_003154:B9J08_003216:B9J08_003238:B9J08_003432:B9J08_003433:B9J08_003547:B9J08_003582:B9J08_003634:HSP60:B9J08_004067:B9J…	398:61818:45943:51083:6363:7131:51131:288:60258:6413:723:70125:8298:32436:55:27:463:1682:42274:6429:42797:2000639:447:2182:6458:462:492:70370:70124:480:42149:34605:50821:6450:43335:43248:56:17148:54:6396:70414:6360:470:6457:1902626:2:34975:6383:6414:466:42780:32543:30490:6351:31048:42026:51085:8033:2183:35617:34599:70126:6515:6452:51604:6364:122:2181:6412:71218:9408:6415:18188:42273:6418:6407:427…
43170	macromolecule metabolic process	61 out of 119 genes, 51.3%	1809 out of 5417 background genes, 33.4%	0.01317	0	B9J08_000091:B9J08_000102:B9J08_000200:B9J08_000207:B9J08_000328:B9J08_000425:B9J08_000461:B9J08_000476:B9J08_000604:B9J08_000698:B9J08_000771:B9J08_000955:B9J08_000965:B9J08_001062:B9J08_001105:RAD51:B9J08_001130:B9J08_001134:B9J08_001220:B9J08_001248:B9J08_001278:B9J08_001365:B9J08_001420:B9J08_001460:B9J08_001474:B9J08_001710:B9J08_001822:B9J08_001885:B9J08_002000:B9J08_002103:B9J08_002224:B9J…	398:61818:60261:6261:6974:6363:43504:2000001:60258:120290:71163:6279:6270:730:921:55:27:30491:32508:1902775:463:6281:42274:31569:31333:6429:42797:36298:6458:722:6325:42254:140719:6468:492:43111:70124:45899:34605:742:45048:34087:16233:6450:43248:724:17148:6360:1902626:6334:2:34975:6383:6312:727:35269:16567:708:42780:42148:32543:31204:7076:30490:6351:31048:1990918:42026:51085:2183:44879:71970:35617…
1901566	organonitrogen compound biosynthetic process	30 out of 119 genes, 25.2%	656 out of 5417 background genes, 12.1%	0.01951	0	B9J08_000091:B9J08_000102:B9J08_000200:B9J08_000328:B9J08_000425:B9J08_000461:B9J08_000604:B9J08_000698:B9J08_000771:B9J08_000955:B9J08_000965:B9J08_001278:B9J08_001420:B9J08_001460:B9J08_001822:B9J08_001885:B9J08_002078:B9J08_002429:B9J08_003216:B9J08_003238:B9J08_003432:B9J08_003433:B9J08_003582:B9J08_003634:B9J08_004067:B9J08_004147:B9J08_004999:B9J08_005005:B9J08_005099:B9J08_005150	27:42274:6429:6520:70124:45984:6807:45048:6541:6450:6529:35269:32543:30490:2183:70126:2181:6412:6407:372:51083:7131:288:6413:70125:8298:32436:2000639:2182:462:6207:42149:51321:7088:54:470:6414:6452:6364:6415:18188:6418
1902969	mitotic DNA replication	6 out of 119 genes, 5.0%	33 out of 5417 background genes, 0.6%	0.02458	0	B9J08_001105:RAD51:B9J08_001474:B9J08_002225:B9J08_003155:B9J08_005515	43504:120290:6279:6270:730:30491:32508:6281:36298:722:16233:724:6312:727:708:42148:1990918:6267:6302:6278:6271:7534:6269:7131:723:1990426:1902981:6310:6260:731:6289:1902969:709:6268:1902975:7533
1902975	mitotic DNA replication initiation	4 out of 119 genes, 3.4%	12 out of 5417 background genes, 0.2%	0.03481	0	B9J08_001474:B9J08_002225:B9J08_003155:B9J08_005515	6279:6270:6281:16233:6302:6278:7534:6269:1902981:6260:731:1902975
6270	DNA replication initiation	6 out of 119 genes, 5.0%	37 out of 5417 background genes, 0.7%	0.04802	0	B9J08_001105:B9J08_001474:B9J08_002225:B9J08_002979:B9J08_003155:B9J08_005515	71163:6279:6270:32508:6281:31333:16233:724:727:6267:6302:6278:6271:7534:33314:6269:1902981:6260:731:1902969:6268:1902975
Molecular function
GOID	GO_term	Cluster frequency	Background frequency	Corrected P-value	False discovery rate	Gene(s) annotated to the term	Directly Annotated GOID List
3735	structural constituent of ribosome	23 out of 119 genes, 19.3%	149 out of 5417 background genes, 2.8%	5.67e-12	0	B9J08_000091:B9J08_000461:B9J08_000604:B9J08_000649:B9J08_000698:B9J08_000771:B9J08_000955:B9J08_001278:B9J08_001460:B9J08_001744:B9J08_001822:B9J08_001885:B9J08_002317:B9J08_003582:B9J08_003634:B9J08_004067:B9J08_004999:B9J08_005005:B9J08_005012:B9J08_005046:B9J08_005099:B9J08_005150:B9J08_005362	3735:19843:3723:8097:4784:46872
5198	structural molecule activity	26 out of 119 genes, 21.8%	223 out of 5417 background genes, 4.1%	9.65e-11	0	B9J08_000091:B9J08_000461:B9J08_000604:B9J08_000649:B9J08_000698:B9J08_000771:B9J08_000955:B9J08_001130:B9J08_001278:B9J08_001460:B9J08_001744:B9J08_001822:B9J08_001885:B9J08_002317:B9J08_002323:B9J08_003245:B9J08_003582:B9J08_003634:B9J08_004067:B9J08_004999:B9J08_005005:B9J08_005012:B9J08_005046:B9J08_005099:B9J08_005150:B9J08_005362	60090:140670:3735:5525:70273:5198:19843:46872:5200:3677:3924:10314:3723:8097:4784
3676	nucleic acid binding	36 out of 119 genes, 30.3%	786 out of 5417 background genes, 14.5%	0.00071	0	B9J08_000200:B9J08_000207:B9J08_000328:B9J08_000698:B9J08_000825:B9J08_000955:B9J08_000965:B9J08_001062:B9J08_001105:RAD51:B9J08_001130:B9J08_001134:B9J08_001278:B9J08_001420:B9J08_001474:B9J08_002000:B9J08_002225:B9J08_002979:B9J08_003021:B9J08_003154:B9J08_003155:B9J08_003216:B9J08_003238:B9J08_003432:B9J08_003433:B9J08_003582:HSP60:B9J08_004067:B9J08_004147:B9J08_004169:B9J08_004493:B9J08_0045…	17116:140670:3735:3747:31369:31418:5506:8270:8198:166:9378:140311:3887:3724:3697:3729:8094:3727:3896:19826:3690:3677:140662:49:3743:3899:31543:16887:150:61629:8143:4823:19843:33679:51087:3676:1056:3746:3678:1990518:43138:2161:46983:1990400:16705:34511:3682:5525:5198:51082:140691:8312:97157:5524:1905334:5371:16706:1054:3688:3924:4812:3723:8097
97159	organic cyclic compound binding	49 out of 119 genes, 41.2%	1302 out of 5417 background genes, 24.0%	0.00227	0	B9J08_000102:B9J08_000144:B9J08_000200:B9J08_000207:B9J08_000328:B9J08_000476:B9J08_000698:B9J08_000811:B9J08_000825:B9J08_000955:B9J08_000965:B9J08_001062:B9J08_001105:RAD51:B9J08_001130:B9J08_001134:B9J08_001278:B9J08_001365:B9J08_001420:B9J08_001463:B9J08_001474:B9J08_002000:B9J08_002078:B9J08_002225:B9J08_002323:B9J08_002819:B9J08_002979:B9J08_003021:B9J08_003154:B9J08_003155:B9J08_003216:B9J…	140670:3735:3747:31369:16743:31418:5506:51287:71949:8270:8198:43531:9378:140311:3727:3896:16972:60090:51787:70273:4674:19826:3690:32033:4070:140662:3743:16597:3899:31543:61629:19843:4823:51087:1056:3746:43138:4017:2161:46983:1990400:4088:3682:3774:5525:5198:8312:1905334:5524:3688:4812:51015:17116:51010:5200:16616:166:10314:3777:3887:3724:3729:3697:8094:3677:49:3922:16887:150:8143:33679:3676:3678:…
3723	RNA binding	20 out of 119 genes, 16.8%	356 out of 5417 background genes, 6.6%	0.00816	0	B9J08_000200:B9J08_000207:B9J08_000698:B9J08_000955:B9J08_001062:B9J08_001105:B9J08_001278:B9J08_001420:B9J08_002000:B9J08_003021:B9J08_003154:B9J08_003216:B9J08_003432:B9J08_003433:B9J08_003582:B9J08_004067:B9J08_004493:B9J08_005015:B9J08_005099:B9J08_005362	3735:31369:31418:5506:8198:9378:140311:3727:19826:3743:31543:19843:4823:43138:2161:1990400:8312:5524:3688:4812:17116:3724:3697:3729:3677:49:16887:8143:33679:3676:1990518:3678:16705:34511:140691:97157:16706:3723:8097
8135	translation factor activity, RNA binding	6 out of 119 genes, 5.0%	43 out of 5417 background genes, 0.8%	0.03231	0.0067	B9J08_000328:B9J08_000965:B9J08_003238:B9J08_003432:B9J08_003433:B9J08_004147	3747:31369:3743:3746:5525:3676:3924:3723
90079	translation regulator activity, nucleic acid binding	6 out of 119 genes, 5.0%	45 out of 5417 background genes, 0.8%	0.04166	0.0086	B9J08_000328:B9J08_000965:B9J08_003238:B9J08_003432:B9J08_003433:B9J08_004147	3747:31369:3743:3746:5525:3676:3924:3723
3697	single-stranded DNA binding	7 out of 119 genes, 5.9%	63 out of 5417 background genes, 1.2%	0.04298	0.0075	B9J08_001105:RAD51:B9J08_001474:B9J08_002225:B9J08_002979:HSP60:B9J08_005515	9378:3727:3896:3690:140662:51087:43138:3682:1905334:5524:3688:17116:166:3887:3724:3697:8094:3677:16887:150:33679:3676:1990518:3678:51082
Cellular component
GOID	GO_term	Cluster frequency	Background frequency	Corrected P-value	False discovery rate	Gene(s) annotated to the term	Directly Annotated GOID List
43228	non-membrane-bounded organelle	60 out of 119 genes, 50.4%	1042 out of 5417 background genes, 19.2%	1.37e-12	0	B9J08_000091:B9J08_000102:B9J08_000207:B9J08_000461:B9J08_000476:B9J08_000604:B9J08_000649:B9J08_000698:B9J08_000771:B9J08_000811:B9J08_000955:B9J08_000965:B9J08_001105:RAD51:B9J08_001130:B9J08_001134:B9J08_001220:B9J08_001248:B9J08_001278:B9J08_001460:B9J08_001463:B9J08_001474:B9J08_001744:B9J08_001822:B9J08_001885:B9J08_002000:B9J08_002022:B9J08_002224:B9J08_002225:B9J08_002317:B9J08_002323:B9J…	5666:5763:33186:32160:5654:110085:5658:5721:42645:140445:35361:5815:35808:785:5762:16459:5881:5621:16460:5759:15934:775:31261:16282:120106:32153:22625:30686:5874:22627:5737:31298:5940:142:31097:8278:5840:5777:36391:5736:99115:5635:123:71014:30688:30863:31934:42729:1990904:5937:22626:71162:43596:140453:33290:33553:32040:794:140602:42555:71541:101031:144:35101:71540:30687:120105:45298:72380:228:120…
43232	intracellular non-membrane-bounded organelle	60 out of 119 genes, 50.4%	1042 out of 5417 background genes, 19.2%	1.37e-12	0	B9J08_000091:B9J08_000102:B9J08_000207:B9J08_000461:B9J08_000476:B9J08_000604:B9J08_000649:B9J08_000698:B9J08_000771:B9J08_000811:B9J08_000955:B9J08_000965:B9J08_001105:RAD51:B9J08_001130:B9J08_001134:B9J08_001220:B9J08_001248:B9J08_001278:B9J08_001460:B9J08_001463:B9J08_001474:B9J08_001744:B9J08_001822:B9J08_001885:B9J08_002000:B9J08_002022:B9J08_002224:B9J08_002225:B9J08_002317:B9J08_002323:B9J…	5666:5763:33186:32160:5654:110085:5658:5721:42645:140445:35361:5815:35808:785:5762:16459:5881:5621:16460:5759:15934:775:31261:16282:120106:32153:22625:30686:5874:22627:5737:31298:5940:142:31097:8278:5840:5777:36391:5736:99115:5635:123:71014:30688:30863:31934:42729:1990904:5937:22626:71162:43596:140453:33290:33553:32040:794:140602:42555:71541:101031:144:35101:71540:30687:120105:45298:228:72380:120…
5840	ribosome	24 out of 119 genes, 20.2%	182 out of 5417 background genes, 3.4%	7.08e-11	0	B9J08_000091:B9J08_000461:B9J08_000604:B9J08_000649:B9J08_000698:B9J08_000771:B9J08_000955:B9J08_000965:B9J08_001278:B9J08_001460:B9J08_001744:B9J08_001822:B9J08_001885:B9J08_002317:B9J08_003582:B9J08_003634:B9J08_004067:B9J08_004999:B9J08_005005:B9J08_005012:B9J08_005046:B9J08_005099:B9J08_005150:B9J08_005362	5763:5762:15934:22625:22627:5840:5736:22626:32040:15935:5739:5730
44391	ribosomal subunit	20 out of 119 genes, 16.8%	144 out of 5417 background genes, 2.7%	2.95e-09	0	B9J08_000091:B9J08_000649:B9J08_000698:B9J08_000771:B9J08_000955:B9J08_000965:B9J08_001278:B9J08_001460:B9J08_001744:B9J08_001822:B9J08_001885:B9J08_002317:B9J08_003634:B9J08_004067:B9J08_004999:B9J08_005005:B9J08_005012:B9J08_005046:B9J08_005099:B9J08_005362	5763:5762:15934:22625:22627:5840:5736:22626:32040:15935:5739:5730
31974	membrane-enclosed lumen	42 out of 119 genes, 35.3%	726 out of 5417 background genes, 13.4%	9.95e-08	0	B9J08_000207:B9J08_000425:B9J08_000476:B9J08_000649:B9J08_000698:B9J08_001062:B9J08_001105:RAD51:B9J08_001130:B9J08_001134:B9J08_001220:B9J08_001248:B9J08_001278:B9J08_001460:B9J08_001474:B9J08_001710:B9J08_001744:B9J08_001822:B9J08_002000:B9J08_002224:B9J08_002225:B9J08_002317:B9J08_002819:B9J08_002979:B9J08_003021:B9J08_003154:B9J08_003155:B9J08_003855:HSP60:B9J08_004169:B9J08_004412:B9J08_0045…	5666:5763:5744:5654:31965:5658:5721:42645:140445:35361:35808:785:5762:5759:15934:775:31261:22625:30686:5737:31298:8278:5840:5736:99115:5635:71014:30688:31934:1990904:71162:43596:140453:33553:99020:32040:99021:794:140602:42555:101031:35101:30687:228:72380:34099:35861:34455:15935:30892:1405:5829:5758:5783:5739:5656:5788:5680:5657:5730:5634:34399:97373
43233	organelle lumen	42 out of 119 genes, 35.3%	726 out of 5417 background genes, 13.4%	9.95e-08	0	B9J08_000207:B9J08_000425:B9J08_000476:B9J08_000649:B9J08_000698:B9J08_001062:B9J08_001105:RAD51:B9J08_001130:B9J08_001134:B9J08_001220:B9J08_001248:B9J08_001278:B9J08_001460:B9J08_001474:B9J08_001710:B9J08_001744:B9J08_001822:B9J08_002000:B9J08_002224:B9J08_002225:B9J08_002317:B9J08_002819:B9J08_002979:B9J08_003021:B9J08_003154:B9J08_003155:B9J08_003855:HSP60:B9J08_004169:B9J08_004412:B9J08_0045…	5666:5763:5744:5654:31965:5658:5721:42645:140445:35361:35808:785:5762:5759:15934:775:31261:22625:30686:5737:31298:8278:5840:5736:99115:5635:71014:30688:31934:1990904:71162:43596:140453:33553:99020:32040:99021:794:140602:42555:101031:35101:30687:228:72380:34099:35861:34455:15935:30892:1405:5829:5758:5783:5739:5656:5788:5680:5657:5730:5634:34399:97373
70013	intracellular organelle lumen	42 out of 119 genes, 35.3%	726 out of 5417 background genes, 13.4%	9.95e-08	0	B9J08_000207:B9J08_000425:B9J08_000476:B9J08_000649:B9J08_000698:B9J08_001062:B9J08_001105:RAD51:B9J08_001130:B9J08_001134:B9J08_001220:B9J08_001248:B9J08_001278:B9J08_001460:B9J08_001474:B9J08_001710:B9J08_001744:B9J08_001822:B9J08_002000:B9J08_002224:B9J08_002225:B9J08_002317:B9J08_002819:B9J08_002979:B9J08_003021:B9J08_003154:B9J08_003155:B9J08_003855:HSP60:B9J08_004169:B9J08_004412:B9J08_0045…	5666:5763:5744:5654:31965:5658:5721:42645:140445:35361:35808:785:5762:5759:15934:775:31261:22625:30686:5737:31298:8278:5840:5736:99115:5635:71014:30688:31934:1990904:71162:43596:140453:33553:99020:32040:99021:794:140602:42555:101031:35101:30687:228:72380:34099:35861:34455:15935:30892:1405:5829:5758:5783:5739:5656:5788:5680:5657:5730:5634:34399:97373
1990904	ribonucleoprotein complex	28 out of 119 genes, 23.5%	387 out of 5417 background genes, 7.1%	1.34e-06	0	B9J08_000091:B9J08_000207:B9J08_000649:B9J08_000698:B9J08_000771:B9J08_000955:B9J08_000965:B9J08_001278:B9J08_001420:B9J08_001460:B9J08_001744:B9J08_001822:B9J08_001885:B9J08_002000:B9J08_002317:B9J08_003021:B9J08_003154:B9J08_003432:B9J08_003547:B9J08_003634:HSP60:B9J08_004067:B9J08_004999:B9J08_005005:B9J08_005012:B9J08_005046:B9J08_005099:B9J08_005362	5763:5684:5654:42645:5762:5759:15934:16282:22625:30686:22627:5737:5681:5840:5736:71014:30688:1990904:22626:42175:33290:33553:32040:71541:101031:71540:30687:34455:15935:5686:5758:5783:5739:974:43614:5852:5730:5634:10494
5759	mitochondrial matrix	18 out of 119 genes, 15.1%	165 out of 5417 background genes, 3.0%	1.76e-06	0	B9J08_000425:B9J08_000649:B9J08_000698:B9J08_001062:RAD51:B9J08_001460:B9J08_001744:B9J08_001822:B9J08_002317:HSP60:B9J08_004412:B9J08_004591:B9J08_004701:B9J08_005005:B9J08_005012:B9J08_005023:B9J08_005046:B9J08_005362	5763:5744:42645:5762:5759:15934:775:5840:71014:794:228:35861:15935:1405:5758:5739
5658	alpha DNA polymerase:primase complex	4 out of 119 genes, 3.4%	4 out of 5417 background genes, 0.1%	2.99e-05	0	B9J08_001474:B9J08_002225:B9J08_003155:B9J08_005515	5658:140445:785:5737:5635:43596:35861:5657:5634
15935	small ribosomal subunit	9 out of 119 genes, 7.6%	55 out of 5417 background genes, 1.0%	0.00032	0	B9J08_000091:B9J08_000649:B9J08_000771:B9J08_000965:B9J08_001744:B9J08_001822:B9J08_004067:B9J08_005012:B9J08_005362	5763:22627:5840:22626:32040:15935:5739
15934	large ribosomal subunit	11 out of 119 genes, 9.2%	89 out of 5417 background genes, 1.6%	0.00041	0	B9J08_000698:B9J08_000955:B9J08_001278:B9J08_001460:B9J08_001885:B9J08_002317:B9J08_003634:B9J08_004999:B9J08_005005:B9J08_005046:B9J08_005099	5762:15934:22625:5840:5736:5730
313	organellar ribosome	10 out of 119 genes, 8.4%	78 out of 5417 background genes, 1.4%	0.00086	0	B9J08_000649:B9J08_000698:B9J08_001460:B9J08_001744:B9J08_001822:B9J08_002317:B9J08_005005:B9J08_005012:B9J08_005046:B9J08_005362	5763:5762:15934:5840:15935:5739
5761	mitochondrial ribosome	10 out of 119 genes, 8.4%	78 out of 5417 background genes, 1.4%	0.00086	0	B9J08_000649:B9J08_000698:B9J08_001460:B9J08_001744:B9J08_001822:B9J08_002317:B9J08_005005:B9J08_005012:B9J08_005046:B9J08_005362	5763:5762:15934:5840:15935:5739
43229	intracellular organelle	81 out of 119 genes, 68.1%	2620 out of 5417 background genes, 48.4%	0.0012	0	B9J08_000034:B9J08_000091:B9J08_000102:B9J08_000200:B9J08_000207:B9J08_000328:B9J08_000425:B9J08_000461:B9J08_000476:B9J08_000604:B9J08_000649:B9J08_000698:B9J08_000771:B9J08_000811:B9J08_000951:B9J08_000955:B9J08_000965:B9J08_001062:B9J08_001105:RAD51:B9J08_001130:B9J08_001134:B9J08_001220:B9J08_001248:B9J08_001278:B9J08_001365:B9J08_001420:B9J08_001460:B9J08_001463:B9J08_001474:B9J08_001710:B9J…	5666:5763:5684:33186:5744:32160:5654:110085:31965:5658:5721:42645:140445:35361:5815:35808:785:5762:16459:5881:5621:5886:16460:5759:15934:775:31261:16282:120106:32153:22625:30686:5874:22627:5737:31298:5940:5681:142:31097:8278:31410:5840:5777:36391:5736:99115:5635:123:5743:71014:30688:30863:31934:42729:5937:1990904:22626:71162:43596:42175:140453:33290:33553:99020:97002:99021:5789:32040:794:140602:4…
22626	cytosolic ribosome	10 out of 119 genes, 8.4%	81 out of 5417 background genes, 1.5%	0.00122	0	B9J08_000091:B9J08_000771:B9J08_000955:B9J08_000965:B9J08_001278:B9J08_001885:B9J08_003634:B9J08_004067:B9J08_004999:B9J08_005099	15934:22625:22627:5840:5736:22626:32040:15935:5730
43226	organelle	81 out of 119 genes, 68.1%	2631 out of 5417 background genes, 48.6%	0.00147	0	B9J08_000034:B9J08_000091:B9J08_000102:B9J08_000200:B9J08_000207:B9J08_000328:B9J08_000425:B9J08_000461:B9J08_000476:B9J08_000604:B9J08_000649:B9J08_000698:B9J08_000771:B9J08_000811:B9J08_000951:B9J08_000955:B9J08_000965:B9J08_001062:B9J08_001105:RAD51:B9J08_001130:B9J08_001134:B9J08_001220:B9J08_001248:B9J08_001278:B9J08_001365:B9J08_001420:B9J08_001460:B9J08_001463:B9J08_001474:B9J08_001710:B9J…	5666:5763:5684:33186:5744:32160:5654:110085:31965:5658:5721:42645:140445:35361:5815:35808:785:5762:16459:5881:5621:5886:16460:5759:15934:775:31261:16282:120106:32153:22625:30686:5874:22627:5737:31298:5940:5681:142:31097:8278:31410:5840:5777:36391:5736:99115:5635:123:5743:71014:30688:30863:31934:42729:5937:1990904:22626:71162:43596:42175:140453:33290:33553:99020:97002:99021:5789:32040:794:140602:4…
43596	nuclear replication fork	7 out of 119 genes, 5.9%	43 out of 5417 background genes, 0.8%	0.00467	0	B9J08_001105:B9J08_001220:B9J08_001474:B9J08_002224:B9J08_002225:B9J08_003155:B9J08_005515	5658:140445:785:31261:5737:31298:5635:71162:43596:42555:35101:35861:5656:5657:5634:97373
43601	nuclear replisome	4 out of 119 genes, 3.4%	10 out of 5417 background genes, 0.2%	0.00566	0	B9J08_001474:B9J08_002225:B9J08_003155:B9J08_005515	5658:140445:785:5737:5635:43596:35861:5657:5634
32991	protein-containing complex	56 out of 119 genes, 47.1%	1631 out of 5417 background genes, 30.1%	0.00838	0	B9J08_000091:B9J08_000207:B9J08_000476:B9J08_000649:B9J08_000698:B9J08_000771:B9J08_000955:B9J08_000965:B9J08_001105:B9J08_001130:B9J08_001134:B9J08_001220:B9J08_001248:B9J08_001278:B9J08_001420:B9J08_001460:B9J08_001463:B9J08_001474:B9J08_001710:B9J08_001744:B9J08_001822:B9J08_001885:B9J08_002000:B9J08_002022:B9J08_002224:B9J08_002225:B9J08_002317:B9J08_002323:B9J08_002720:B9J08_002819:B9J08_002…	5666:5763:5684:33186:5744:32160:5654:110085:31965:5658:5721:42645:140445:35361:35808:785:5762:5881:16459:5759:5621:16460:15934:775:31261:16282:120106:32153:22625:30686:5874:22627:5737:31298:5940:5681:142:31097:8278:5840:36391:5736:99115:5635:123:71014:30688:30863:31934:42729:5937:1990904:22626:71162:43596:42175:140453:33290:110115:33553:99020:99021:32040:794:140602:42555:71541:101031:144:35101:71…
5622	intracellular anatomical structure	85 out of 119 genes, 71.4%	2927 out of 5417 background genes, 54.0%	0.00879	0	B9J08_000034:B9J08_000091:B9J08_000102:B9J08_000200:B9J08_000207:B9J08_000328:B9J08_000425:B9J08_000461:B9J08_000476:B9J08_000555:B9J08_000604:B9J08_000649:B9J08_000698:B9J08_000771:B9J08_000811:B9J08_000951:B9J08_000955:B9J08_000965:B9J08_001062:B9J08_001105:RAD51:B9J08_001130:B9J08_001134:B9J08_001220:B9J08_001248:B9J08_001278:B9J08_001365:B9J08_001420:B9J08_001460:B9J08_001463:B9J08_001474:B9J…	5666:5763:5684:33186:5744:32160:5654:110085:31965:5658:5721:42645:140445:35361:5815:35808:785:5762:16459:5881:30427:5621:5886:16460:5759:15934:775:31261:16282:120106:32153:22625:30686:5874:22627:5737:31298:5940:5681:142:31097:8278:31410:5840:5777:36391:5736:99115:5635:123:5743:71014:30688:30863:31934:42729:5937:1990904:22626:71162:43332:43596:42175:140453:33290:110115:33553:99020:97002:99021:5789…
31981	nuclear lumen	24 out of 119 genes, 20.2%	478 out of 5417 background genes, 8.8%	0.01138	0	B9J08_000207:B9J08_000476:B9J08_001105:RAD51:B9J08_001130:B9J08_001134:B9J08_001220:B9J08_001248:B9J08_001278:B9J08_001474:B9J08_001710:B9J08_002000:B9J08_002224:B9J08_002225:B9J08_002979:B9J08_003021:B9J08_003154:B9J08_003155:B9J08_003855:B9J08_004169:B9J08_004999:B9J08_005015:B9J08_005511:B9J08_005515	5666:5654:5658:5721:140445:35361:35808:785:5759:15934:775:31261:22625:30686:5737:31298:8278:5840:5736:99115:5635:30688:31934:1990904:71162:43596:140453:33553:32040:794:140602:42555:101031:35101:30687:228:72380:35861:34455:30892:5829:5739:5656:5680:5657:5730:5634:34399:97373
30894	replisome	4 out of 119 genes, 3.4%	13 out of 5417 background genes, 0.2%	0.01833	0	B9J08_001474:B9J08_002225:B9J08_003155:B9J08_005515	5658:140445:785:5737:5635:43596:35861:5657:5634
42575	DNA polymerase complex	4 out of 119 genes, 3.4%	13 out of 5417 background genes, 0.2%	0.01833	0	B9J08_001474:B9J08_002225:B9J08_003155:B9J08_005515	5658:140445:785:5737:5635:43596:35861:5657:5634
5739	mitochondrion	26 out of 119 genes, 21.8%	562 out of 5417 background genes, 10.4%	0.02145	0	B9J08_000034:B9J08_000200:B9J08_000328:B9J08_000425:B9J08_000649:B9J08_000698:B9J08_000951:B9J08_001062:RAD51:B9J08_001248:B9J08_001460:B9J08_001744:B9J08_001822:B9J08_002317:B9J08_003238:HSP60:B9J08_004147:B9J08_004412:B9J08_004591:B9J08_004701:B9J08_004728:B9J08_005005:B9J08_005012:B9J08_005023:B9J08_005046:B9J08_005362	5763:5744:42645:5762:5759:15934:775:8278:5840:5743:71014:97002:794:228:35861:15935:30892:30061:1405:5758:5739:16020:5634
98798	mitochondrial protein-containing complex	12 out of 119 genes, 10.1%	158 out of 5417 background genes, 2.9%	0.0215	0	B9J08_000649:B9J08_000698:B9J08_001460:B9J08_001744:B9J08_001822:B9J08_002317:B9J08_004412:B9J08_005005:B9J08_005012:B9J08_005023:B9J08_005046:B9J08_005362	5763:5744:5762:15934:5840:15935:1405:5739
5657	replication fork	7 out of 119 genes, 5.9%	55 out of 5417 background genes, 1.0%	0.02366	0	B9J08_001105:B9J08_001220:B9J08_001474:B9J08_002224:B9J08_002225:B9J08_003155:B9J08_005515	5658:140445:785:31261:5737:31298:5635:71162:43596:42555:35101:35861:5656:5657:5634:97373
22625	cytosolic large ribosomal subunit	6 out of 119 genes, 5.0%	43 out of 5417 background genes, 0.8%	0.04195	0	B9J08_000955:B9J08_001278:B9J08_001885:B9J08_003634:B9J08_004999:B9J08_005099	15934:22625:5840:5736:5730
Species	Platform:	Type of genes	Criteria	Number of genes
C. auris	FungiDB	downregulated	DEG; FC<-1.5	119
Biological process
ID	Name	Bgd count	Result count	Result gene list	Pct of bgd	Fold enrichment	Odds ratio	P-value	Benjamini	Bonferroni
GO:0006412	translation	251	27	B9J08_000091,B9J08_000102,B9J08_000200,B9J08_000328,B9J08_000461,B9J08_000604,B9J08_000698,B9J08_000771,B9J08_000955,B9J08_000965,B9J08_001278,B9J08_001460,B9J08_001822,B9J08_001885,B9J08_003216,B9J08_003238,B9J08_003432,B9J08_003433,B9J08_003582,B9J08_003634,B9J08_004067,B9J08_004147,B9J08_004999,B9J08_005005,B9J08_005099,B9J08_005150,B9J08_005362,	10.8	4.89	6.9	1.597e-12	1.20307e-09	1.63852e-09
GO:0043043	peptide biosynthetic process	255	27	B9J08_000091,B9J08_000102,B9J08_000200,B9J08_000328,B9J08_000461,B9J08_000604,B9J08_000698,B9J08_000771,B9J08_000955,B9J08_000965,B9J08_001278,B9J08_001460,B9J08_001822,B9J08_001885,B9J08_003216,B9J08_003238,B9J08_003432,B9J08_003433,B9J08_003582,B9J08_003634,B9J08_004067,B9J08_004147,B9J08_004999,B9J08_005005,B9J08_005099,B9J08_005150,B9J08_005362,	10.6	4.81	6.78	2.34516e-12	1.20307e-09	2.40613e-09
GO:0006518	peptide metabolic process	276	27	B9J08_000091,B9J08_000102,B9J08_000200,B9J08_000328,B9J08_000461,B9J08_000604,B9J08_000698,B9J08_000771,B9J08_000955,B9J08_000965,B9J08_001278,B9J08_001460,B9J08_001822,B9J08_001885,B9J08_003216,B9J08_003238,B9J08_003432,B9J08_003433,B9J08_003582,B9J08_003634,B9J08_004067,B9J08_004147,B9J08_004999,B9J08_005005,B9J08_005099,B9J08_005150,B9J08_005362,	9.8	4.44	6.18	1.56844e-11	5.36406e-09	1.60922e-08
GO:0043604	amide biosynthetic process	291	27	B9J08_000091,B9J08_000102,B9J08_000200,B9J08_000328,B9J08_000461,B9J08_000604,B9J08_000698,B9J08_000771,B9J08_000955,B9J08_000965,B9J08_001278,B9J08_001460,B9J08_001822,B9J08_001885,B9J08_003216,B9J08_003238,B9J08_003432,B9J08_003433,B9J08_003582,B9J08_003634,B9J08_004067,B9J08_004147,B9J08_004999,B9J08_005005,B9J08_005099,B9J08_005150,B9J08_005362,	9.3	4.22	5.8	5.46872e-11	1.40273e-08	5.6109e-08
GO:0034645	cellular macromolecule biosynthetic process	722	41	B9J08_000091,B9J08_000102,B9J08_000200,B9J08_000328,B9J08_000461,B9J08_000604,B9J08_000698,B9J08_000771,B9J08_000955,B9J08_000965,B9J08_001105,B9J08_001108,B9J08_001134,B9J08_001220,B9J08_001278,B9J08_001420,B9J08_001460,B9J08_001474,B9J08_001822,B9J08_001885,B9J08_002224,B9J08_002225,B9J08_002819,B9J08_002979,B9J08_003155,B9J08_003216,B9J08_003238,B9J08_003432,B9J08_003433,B9J08_003582,B9J08_003…	5.7	2.58	3.78	1.22729e-09	2.51839e-07	1.2592e-06
GO:0043603	cellular amide metabolic process	338	27	B9J08_000091,B9J08_000102,B9J08_000200,B9J08_000328,B9J08_000461,B9J08_000604,B9J08_000698,B9J08_000771,B9J08_000955,B9J08_000965,B9J08_001278,B9J08_001460,B9J08_001822,B9J08_001885,B9J08_003216,B9J08_003238,B9J08_003432,B9J08_003433,B9J08_003582,B9J08_003634,B9J08_004067,B9J08_004147,B9J08_004999,B9J08_005005,B9J08_005099,B9J08_005150,B9J08_005362,	8	3.63	4.87	1.69331e-09	2.89556e-07	1.73734e-06
GO:0009059	macromolecule biosynthetic process	739	41	B9J08_000091,B9J08_000102,B9J08_000200,B9J08_000328,B9J08_000461,B9J08_000604,B9J08_000698,B9J08_000771,B9J08_000955,B9J08_000965,B9J08_001105,B9J08_001108,B9J08_001134,B9J08_001220,B9J08_001278,B9J08_001420,B9J08_001460,B9J08_001474,B9J08_001822,B9J08_001885,B9J08_002224,B9J08_002225,B9J08_002819,B9J08_002979,B9J08_003155,B9J08_003216,B9J08_003238,B9J08_003432,B9J08_003433,B9J08_003582,B9J08_003…	5.5	2.52	3.67	2.52717e-09	3.70411e-07	2.59287e-06
GO:0034641	cellular nitrogen compound metabolic process	1428	54	B9J08_000091,B9J08_000102,B9J08_000200,B9J08_000207,B9J08_000328,B9J08_000425,B9J08_000461,B9J08_000604,B9J08_000698,B9J08_000771,B9J08_000955,B9J08_000965,B9J08_001062,B9J08_001105,B9J08_001108,B9J08_001130,B9J08_001134,B9J08_001220,B9J08_001248,B9J08_001278,B9J08_001460,B9J08_001474,B9J08_001822,B9J08_001885,B9J08_002000,B9J08_002078,B9J08_002103,B9J08_002224,B9J08_002225,B9J08_002979,B9J08_003…	3.8	1.72	2.57	2.28757e-06	0.000293381	0.00234705
GO:0044271	cellular nitrogen compound biosynthetic process	694	33	B9J08_000091,B9J08_000102,B9J08_000200,B9J08_000328,B9J08_000461,B9J08_000604,B9J08_000698,B9J08_000771,B9J08_000955,B9J08_000965,B9J08_001134,B9J08_001278,B9J08_001460,B9J08_001474,B9J08_001822,B9J08_001885,B9J08_002078,B9J08_002225,B9J08_003216,B9J08_003238,B9J08_003432,B9J08_003433,B9J08_003582,B9J08_003634,B9J08_004067,B9J08_004147,B9J08_004169,B9J08_004999,B9J08_005005,B9J08_005099,B9J08_005…	4.8	2.16	2.79	6.56075e-06	0.000747926	0.00673133
GO:0006458	'de novo' protein folding	8	4	B9J08_000102,B9J08_000476,B9J08_003991,B9J08_004701,	50	22.72	46.19	1.44804e-05	0.00148568	0.0148568
GO:0044260	cellular macromolecule metabolic process	1478	53	B9J08_000091,B9J08_000102,B9J08_000200,B9J08_000328,B9J08_000425,B9J08_000461,B9J08_000604,B9J08_000698,B9J08_000771,B9J08_000955,B9J08_000965,B9J08_001062,B9J08_001105,B9J08_001108,B9J08_001130,B9J08_001134,B9J08_001220,B9J08_001248,B9J08_001278,B9J08_001420,B9J08_001460,B9J08_001474,B9J08_001710,B9J08_001822,B9J08_001885,B9J08_002103,B9J08_002224,B9J08_002225,B9J08_002819,B9J08_002979,B9J08_003…	3.6	1.63	2.34	1.78713e-05	0.00166691	0.018336
GO:0043170	macromolecule metabolic process	1872	62	B9J08_000091,B9J08_000102,B9J08_000200,B9J08_000207,B9J08_000328,B9J08_000425,B9J08_000461,B9J08_000476,B9J08_000604,B9J08_000698,B9J08_000771,B9J08_000955,B9J08_000965,B9J08_001062,B9J08_001105,B9J08_001108,B9J08_001130,B9J08_001134,B9J08_001220,B9J08_001248,B9J08_001278,B9J08_001420,B9J08_001460,B9J08_001474,B9J08_001710,B9J08_001822,B9J08_001885,B9J08_002000,B9J08_002103,B9J08_002224,B9J08_002…	3.3	1.5	2.31	2.27813e-05	0.0019478	0.0233736
GO:0006269	DNA replication, synthesis of RNA primer	4	3	B9J08_001474,B9J08_002225,B9J08_005515,	75	34.08	137.28	4.07698e-05	0.00321768	0.0418298
GO:1901566	organonitrogen compound biosynthetic process	672	30	B9J08_000091,B9J08_000102,B9J08_000200,B9J08_000328,B9J08_000461,B9J08_000604,B9J08_000698,B9J08_000771,B9J08_000955,B9J08_000965,B9J08_001278,B9J08_001420,B9J08_001460,B9J08_001822,B9J08_001885,B9J08_002078,B9J08_002429,B9J08_003216,B9J08_003238,B9J08_003432,B9J08_003433,B9J08_003582,B9J08_003634,B9J08_004067,B9J08_004147,B9J08_004999,B9J08_005005,B9J08_005099,B9J08_005150,B9J08_005362,	4.5	2.03	2.52	6.98323e-05	0.00488467	0.0716479
GO:0044249	cellular biosynthetic process	1145	43	B9J08_000091,B9J08_000102,B9J08_000200,B9J08_000328,B9J08_000461,B9J08_000604,B9J08_000698,B9J08_000771,B9J08_000955,B9J08_000965,B9J08_001105,B9J08_001108,B9J08_001134,B9J08_001220,B9J08_001278,B9J08_001420,B9J08_001460,B9J08_001474,B9J08_001822,B9J08_001885,B9J08_002078,B9J08_002224,B9J08_002225,B9J08_002429,B9J08_002819,B9J08_002979,B9J08_003155,B9J08_003216,B9J08_003238,B9J08_003432,B9J08_003…	3.8	1.71	2.26	7.14134e-05	0.00488467	0.0732701
GO:1901576	organic substance biosynthetic process	1172	43	B9J08_000091,B9J08_000102,B9J08_000200,B9J08_000328,B9J08_000461,B9J08_000604,B9J08_000698,B9J08_000771,B9J08_000955,B9J08_000965,B9J08_001105,B9J08_001108,B9J08_001134,B9J08_001220,B9J08_001278,B9J08_001420,B9J08_001460,B9J08_001474,B9J08_001822,B9J08_001885,B9J08_002078,B9J08_002224,B9J08_002225,B9J08_002429,B9J08_002819,B9J08_002979,B9J08_003155,B9J08_003216,B9J08_003238,B9J08_003432,B9J08_003…	3.7	1.67	2.19	0.000127514	0.00817684	0.130829
GO:0010467	gene expression	958	37	B9J08_000091,B9J08_000102,B9J08_000200,B9J08_000207,B9J08_000328,B9J08_000461,B9J08_000604,B9J08_000698,B9J08_000771,B9J08_000955,B9J08_000965,B9J08_001134,B9J08_001278,B9J08_001460,B9J08_001822,B9J08_001885,B9J08_002000,B9J08_003021,B9J08_003154,B9J08_003216,B9J08_003238,B9J08_003432,B9J08_003433,B9J08_003547,B9J08_003582,B9J08_003634,B9J08_003991,B9J08_004067,B9J08_004147,B9J08_004153,B9J08_004…	3.9	1.75	2.23	0.00017432	0.0105207	0.178853
GO:0009058	biosynthetic process	1196	43	B9J08_000091,B9J08_000102,B9J08_000200,B9J08_000328,B9J08_000461,B9J08_000604,B9J08_000698,B9J08_000771,B9J08_000955,B9J08_000965,B9J08_001105,B9J08_001108,B9J08_001134,B9J08_001220,B9J08_001278,B9J08_001420,B9J08_001460,B9J08_001474,B9J08_001822,B9J08_001885,B9J08_002078,B9J08_002224,B9J08_002225,B9J08_002429,B9J08_002819,B9J08_002979,B9J08_003155,B9J08_003216,B9J08_003238,B9J08_003432,B9J08_003…	3.6	1.63	2.13	0.000208779	0.0119004	0.214208
GO:0006261	DNA-dependent DNA replication	100	9	B9J08_001105,B9J08_001108,B9J08_001220,B9J08_001474,B9J08_002224,B9J08_002225,B9J08_002979,B9J08_003155,B9J08_005515,	9	4.09	4.72	0.000307502	0.0166051	0.315497
GO:0070125	mitochondrial translational elongation	2	2	B9J08_003238,B9J08_004147,	100	45.44	inf	0.000479776	0.0246125	0.49225
GO:0006260	DNA replication	112	9	B9J08_001105,B9J08_001108,B9J08_001220,B9J08_001474,B9J08_002224,B9J08_002225,B9J08_002979,B9J08_003155,B9J08_005515,	8	3.65	4.16	0.000713695	0.0348691	0.732251
GO:0006302	double-strand break repair	98	8	B9J08_001105,B9J08_001108,B9J08_001130,B9J08_001248,B9J08_002225,B9J08_002979,B9J08_003855,B9J08_005515,	8.2	3.71	4.2	0.00128338	0.0592891	1
GO:0006414	translational elongation	23	4	B9J08_000102,B9J08_003238,B9J08_004147,B9J08_004999,	17.4	7.9	9.69	0.00141996	0.0592891	1
GO:0006407	rRNA export from nucleus	11	3	B9J08_000091,B9J08_003107,B9J08_004067,	27.3	12.39	17.13	0.00150245	0.0592891	1
GO:0042026	protein refolding	11	3	B9J08_000476,B9J08_003991,B9J08_004701,	27.3	12.39	17.13	0.00150245	0.0592891	1
GO:0051029	rRNA transport	11	3	B9J08_000091,B9J08_003107,B9J08_004067,	27.3	12.39	17.13	0.00150245	0.0592891	1
GO:0071840	cellular component organization or biogenesis	1471	47	B9J08_000091,B9J08_000102,B9J08_000207,B9J08_000328,B9J08_000425,B9J08_000476,B9J08_000771,B9J08_000951,B9J08_001062,B9J08_001105,B9J08_001108,B9J08_001130,B9J08_001220,B9J08_001248,B9J08_001420,B9J08_001463,B9J08_002000,B9J08_002022,B9J08_002103,B9J08_002224,B9J08_002317,B9J08_002323,B9J08_002819,B9J08_002979,B9J08_003021,B9J08_003057,B9J08_003107,B9J08_003155,B9J08_003216,B9J08_003245,B9J08_003…	3.2	1.45	1.86	0.0015739	0.0598084	1
GO:0044267	cellular protein metabolic process	954	34	B9J08_000091,B9J08_000102,B9J08_000200,B9J08_000328,B9J08_000461,B9J08_000604,B9J08_000698,B9J08_000771,B9J08_000955,B9J08_000965,B9J08_001278,B9J08_001420,B9J08_001460,B9J08_001710,B9J08_001822,B9J08_001885,B9J08_002819,B9J08_003216,B9J08_003238,B9J08_003432,B9J08_003433,B9J08_003582,B9J08_003634,B9J08_003991,B9J08_004067,B9J08_004147,B9J08_004701,B9J08_004999,B9J08_005005,B9J08_005099,B9J08_005…	3.6	1.62	1.96	0.00164927	0.060434	1
GO:0002181	cytoplasmic translation	60	6	B9J08_000102,B9J08_000955,B9J08_001885,B9J08_003432,B9J08_003634,B9J08_004999,	10	4.54	5.18	0.00187761	0.0664284	1
GO:0032543	mitochondrial translation	44	5	B9J08_000200,B9J08_000328,B9J08_001460,B9J08_003238,B9J08_004147,	11.4	5.16	5.94	0.0025731	0.0880001	1
GO:0006807	nitrogen compound metabolic process	2217	63	B9J08_000091,B9J08_000102,B9J08_000200,B9J08_000207,B9J08_000328,B9J08_000425,B9J08_000461,B9J08_000476,B9J08_000604,B9J08_000698,B9J08_000771,B9J08_000955,B9J08_000965,B9J08_001062,B9J08_001105,B9J08_001108,B9J08_001130,B9J08_001134,B9J08_001220,B9J08_001248,B9J08_001278,B9J08_001420,B9J08_001460,B9J08_001474,B9J08_001710,B9J08_001822,B9J08_001885,B9J08_002000,B9J08_002078,B9J08_002103,B9J08_002…	2.8	1.29	1.77	0.00308938	0.101282	1
GO:0034087	establishment of mitotic sister chromatid cohesion	14	3	B9J08_001130,B9J08_001220,B9J08_001248,	21.4	9.74	12.45	0.00315889	0.101282	1
GO:0019538	protein metabolic process	1033	35	B9J08_000091,B9J08_000102,B9J08_000200,B9J08_000328,B9J08_000461,B9J08_000476,B9J08_000604,B9J08_000698,B9J08_000771,B9J08_000955,B9J08_000965,B9J08_001278,B9J08_001420,B9J08_001460,B9J08_001710,B9J08_001822,B9J08_001885,B9J08_002819,B9J08_003216,B9J08_003238,B9J08_003432,B9J08_003433,B9J08_003582,B9J08_003634,B9J08_003991,B9J08_004067,B9J08_004147,B9J08_004701,B9J08_004999,B9J08_005005,B9J08_005…	3.4	1.54	1.85	0.00337553	0.104948	1
GO:0034085	establishment of sister chromatid cohesion	15	3	B9J08_001130,B9J08_001220,B9J08_001248,	20	9.09	11.41	0.00388595	0.117264	1
GO:0042254	ribosome biogenesis	292	14	B9J08_000091,B9J08_000102,B9J08_000207,B9J08_000771,B9J08_001062,B9J08_002000,B9J08_002317,B9J08_003021,B9J08_003107,B9J08_004067,B9J08_004153,B9J08_005015,B9J08_005099,B9J08_005511,	4.8	2.18	2.43	0.00438804	0.127387	1
GO:0022613	ribonucleoprotein complex biogenesis	357	16	B9J08_000091,B9J08_000102,B9J08_000207,B9J08_000771,B9J08_001062,B9J08_002000,B9J08_002317,B9J08_003021,B9J08_003107,B9J08_003432,B9J08_004067,B9J08_004153,B9J08_004918,B9J08_005015,B9J08_005099,B9J08_005511,	4.5	2.04	2.28	0.0045183	0.127387	1
GO:0061077	chaperone-mediated protein folding	5	2	B9J08_000476,B9J08_004918,	40	18.17	30.19	0.00459389	0.127387	1
GO:0006259	DNA metabolic process	329	15	B9J08_000425,B9J08_001105,B9J08_001108,B9J08_001130,B9J08_001220,B9J08_001248,B9J08_001474,B9J08_002103,B9J08_002224,B9J08_002225,B9J08_002979,B9J08_003155,B9J08_003855,B9J08_004918,B9J08_005515,	4.6	2.07	2.31	0.00511236	0.136101	1
GO:0140694	non-membrane-bounded organelle assembly	97	7	B9J08_001062,B9J08_002103,B9J08_002323,B9J08_003245,B9J08_005015,B9J08_005099,B9J08_005249,	7.2	3.28	3.64	0.00517344	0.136101	1
GO:0044085	cellular component biogenesis	868	30	B9J08_000091,B9J08_000102,B9J08_000207,B9J08_000771,B9J08_000951,B9J08_001062,B9J08_001105,B9J08_001463,B9J08_002000,B9J08_002022,B9J08_002103,B9J08_002224,B9J08_002317,B9J08_002323,B9J08_002819,B9J08_002979,B9J08_003021,B9J08_003107,B9J08_003245,B9J08_003432,B9J08_003991,B9J08_004067,B9J08_004153,B9J08_004728,B9J08_004918,B9J08_005015,B9J08_005099,B9J08_005245,B9J08_005249,B9J08_005511,	3.5	1.57	1.83	0.00551852	0.138275	1
GO:0007064	mitotic sister chromatid cohesion	33	4	B9J08_001130,B9J08_001220,B9J08_001248,B9J08_003057,	12.1	5.51	6.34	0.00554436	0.138275	1
GO:0006996	organelle organization	908	31	B9J08_000425,B9J08_000476,B9J08_000951,B9J08_001062,B9J08_001105,B9J08_001108,B9J08_001130,B9J08_001220,B9J08_001248,B9J08_001420,B9J08_001463,B9J08_002022,B9J08_002103,B9J08_002224,B9J08_002323,B9J08_002819,B9J08_003057,B9J08_003155,B9J08_003245,B9J08_003991,B9J08_004412,B9J08_004591,B9J08_004701,B9J08_004728,B9J08_004918,B9J08_005015,B9J08_005023,B9J08_005099,B9J08_005249,B9J08_005442,B9J08_005…	3.4	1.55	1.82	0.0056604	0.138275	1
GO:0007049	cell cycle	440	18	B9J08_000425,B9J08_001105,B9J08_001108,B9J08_001130,B9J08_001220,B9J08_001248,B9J08_001420,B9J08_001463,B9J08_001710,B9J08_002323,B9J08_002720,B9J08_002979,B9J08_003057,B9J08_003245,B9J08_003855,B9J08_005245,B9J08_005249,B9J08_005515,	4.1	1.86	2.09	0.00676244	0.156413	1
GO:0034975	protein folding in endoplasmic reticulum	6	2	B9J08_000476,B9J08_001365,	33.3	15.15	22.64	0.00679215	0.156413	1
GO:0006270	DNA replication initiation	35	4	B9J08_001105,B9J08_002979,B9J08_003155,B9J08_005515,	11.4	5.19	5.93	0.00686021	0.156413	1
GO:0044238	primary metabolic process	2377	65	B9J08_000091,B9J08_000102,B9J08_000200,B9J08_000207,B9J08_000328,B9J08_000425,B9J08_000461,B9J08_000476,B9J08_000604,B9J08_000698,B9J08_000771,B9J08_000955,B9J08_000965,B9J08_001062,B9J08_001105,B9J08_001108,B9J08_001130,B9J08_001134,B9J08_001220,B9J08_001248,B9J08_001278,B9J08_001420,B9J08_001460,B9J08_001474,B9J08_001710,B9J08_001822,B9J08_001885,B9J08_002000,B9J08_002078,B9J08_002103,B9J08_002…	2.7	1.24	1.68	0.00733381	0.163576	1
GO:0006450	regulation of translational fidelity	19	3	B9J08_000102,B9J08_003216,B9J08_003634,	15.8	7.17	8.55	0.00776405	0.169488	1
GO:0000002	mitochondrial genome maintenance	37	4	B9J08_001108,B9J08_004591,B9J08_004701,B9J08_005501,	10.8	4.91	5.56	0.00836794	0.171728	1
GO:0006457	protein folding	81	6	B9J08_000102,B9J08_000476,B9J08_001365,B9J08_003991,B9J08_004701,B9J08_004918,	7.4	3.37	3.71	0.00839936	0.171728	1
GO:0140053	mitochondrial gene expression	59	5	B9J08_000200,B9J08_000328,B9J08_001460,B9J08_003238,B9J08_004147,	8.5	3.85	4.27	0.00914873	0.171728	1
GO:0070880	fungal-type cell wall beta-glucan biosynthetic process	7	2	B9J08_002819,B9J08_005245,	28.6	12.98	18.11	0.00937306	0.171728	1
GO:0030011	maintenance of cell polarity	7	2	B9J08_000555,B9J08_002323,	28.6	12.98	18.11	0.00937306	0.171728	1
GO:0070592	cell wall polysaccharide biosynthetic process	7	2	B9J08_002819,B9J08_005245,	28.6	12.98	18.11	0.00937306	0.171728	1
GO:0007063	regulation of sister chromatid cohesion	7	2	B9J08_001130,B9J08_002224,	28.6	12.98	18.11	0.00937306	0.171728	1
GO:0051278	fungal-type cell wall polysaccharide biosynthetic process	7	2	B9J08_002819,B9J08_005245,	28.6	12.98	18.11	0.00937306	0.171728	1
GO:0034410	cell wall beta-glucan biosynthetic process	7	2	B9J08_002819,B9J08_005245,	28.6	12.98	18.11	0.00937306	0.171728	1
GO:1903047	mitotic cell cycle process	255	12	B9J08_001105,B9J08_001108,B9J08_001130,B9J08_001220,B9J08_001248,B9J08_001463,B9J08_002323,B9J08_002979,B9J08_003057,B9J08_003245,B9J08_005249,B9J08_005515,	4.7	2.14	2.35	0.00959045	0.172628	1
GO:0000278	mitotic cell cycle	260	12	B9J08_001105,B9J08_001108,B9J08_001130,B9J08_001220,B9J08_001248,B9J08_001463,B9J08_002323,B9J08_002979,B9J08_003057,B9J08_003245,B9J08_005249,B9J08_005515,	4.6	2.1	2.3	0.0111036	0.183583	1
GO:0006974	cellular response to DNA damage stimulus	261	12	B9J08_001105,B9J08_001108,B9J08_001130,B9J08_001220,B9J08_001248,B9J08_002103,B9J08_002224,B9J08_002225,B9J08_002979,B9J08_003855,B9J08_005255,B9J08_005515,	4.6	2.09	2.29	0.0114273	0.183583	1
GO:0007005	mitochondrion organization	199	10	B9J08_000951,B9J08_001108,B9J08_003245,B9J08_003991,B9J08_004412,B9J08_004591,B9J08_004701,B9J08_004728,B9J08_005023,B9J08_005501,	5	2.28	2.5	0.0115575	0.183583	1
GO:0034622	cellular protein-containing complex assembly	361	15	B9J08_000951,B9J08_001062,B9J08_001105,B9J08_002103,B9J08_002224,B9J08_002323,B9J08_002979,B9J08_003245,B9J08_003432,B9J08_003991,B9J08_004728,B9J08_004918,B9J08_005015,B9J08_005099,B9J08_005249,	4.2	1.89	2.08	0.0117577	0.183583	1
GO:0006281	DNA repair	231	11	B9J08_001105,B9J08_001108,B9J08_001130,B9J08_001220,B9J08_001248,B9J08_002103,B9J08_002224,B9J08_002225,B9J08_002979,B9J08_003855,B9J08_005515,	4.8	2.16	2.37	0.0119918	0.183583	1
GO:0034406	cell wall beta-glucan metabolic process	8	2	B9J08_002819,B9J08_005245,	25	11.36	15.09	0.012319	0.183583	1
GO:0033615	mitochondrial proton-transporting ATP synthase complex assembly	8	2	B9J08_000951,B9J08_004728,	25	11.36	15.09	0.012319	0.183583	1
GO:0043461	proton-transporting ATP synthase complex assembly	8	2	B9J08_000951,B9J08_004728,	25	11.36	15.09	0.012319	0.183583	1
GO:0070879	fungal-type cell wall beta-glucan metabolic process	8	2	B9J08_002819,B9J08_005245,	25	11.36	15.09	0.012319	0.183583	1
GO:1990542	mitochondrial transmembrane transport	42	4	B9J08_003991,B9J08_004412,B9J08_004591,B9J08_005023,	9.5	4.33	4.83	0.0130441	0.183583	1
GO:0043933	protein-containing complex subunit organization	470	18	B9J08_000328,B9J08_000476,B9J08_000951,B9J08_001062,B9J08_001105,B9J08_002103,B9J08_002224,B9J08_002323,B9J08_002979,B9J08_003216,B9J08_003245,B9J08_003432,B9J08_003991,B9J08_004728,B9J08_004918,B9J08_005015,B9J08_005099,B9J08_005249,	3.8	1.74	1.93	0.0130624	0.183583	1
GO:0022402	cell cycle process	404	16	B9J08_000425,B9J08_001105,B9J08_001108,B9J08_001130,B9J08_001220,B9J08_001248,B9J08_001463,B9J08_002323,B9J08_002720,B9J08_002979,B9J08_003057,B9J08_003245,B9J08_003855,B9J08_005245,B9J08_005249,B9J08_005515,	4	1.8	1.99	0.0143338	0.183583	1
GO:0000280	nuclear division	118	7	B9J08_000425,B9J08_001108,B9J08_001130,B9J08_001220,B9J08_001248,B9J08_003057,B9J08_003245,	5.9	2.7	2.93	0.0145995	0.183583	1
GO:0065003	protein-containing complex assembly	372	15	B9J08_000951,B9J08_001062,B9J08_001105,B9J08_002103,B9J08_002224,B9J08_002323,B9J08_002979,B9J08_003245,B9J08_003432,B9J08_003991,B9J08_004728,B9J08_004918,B9J08_005015,B9J08_005099,B9J08_005249,	4	1.83	2.01	0.0151979	0.183583	1
GO:0070925	organelle assembly	119	7	B9J08_001062,B9J08_002103,B9J08_002323,B9J08_003245,B9J08_005015,B9J08_005099,B9J08_005249,	5.9	2.67	2.91	0.0152385	0.183583	1
GO:0007062	sister chromatid cohesion	44	4	B9J08_001130,B9J08_001220,B9J08_001248,B9J08_003057,	9.1	4.13	4.58	0.015301	0.183583	1
GO:0010383	cell wall polysaccharide metabolic process	9	2	B9J08_002819,B9J08_005245,	22.2	10.1	12.93	0.0156131	0.183583	1
GO:0071966	fungal-type cell wall polysaccharide metabolic process	9	2	B9J08_002819,B9J08_005245,	22.2	10.1	12.93	0.0156131	0.183583	1
GO:0000070	mitotic sister chromatid segregation	68	5	B9J08_001130,B9J08_001220,B9J08_001248,B9J08_003057,B9J08_003245,	7.4	3.34	3.66	0.0163147	0.183583	1
GO:0006626	protein targeting to mitochondrion	45	4	B9J08_003991,B9J08_004412,B9J08_004728,B9J08_005023,	8.9	4.04	4.47	0.0165162	0.183583	1
GO:0033554	cellular response to stress	524	19	B9J08_000102,B9J08_000476,B9J08_001105,B9J08_001108,B9J08_001130,B9J08_001220,B9J08_001248,B9J08_002103,B9J08_002224,B9J08_002225,B9J08_002819,B9J08_002979,B9J08_003216,B9J08_003855,B9J08_004153,B9J08_004493,B9J08_004918,B9J08_005255,B9J08_005515,	3.6	1.65	1.82	0.0185283	0.183583	1
GO:0097064	ncRNA export from nucleus	26	3	B9J08_000091,B9J08_003107,B9J08_004067,	11.5	5.24	5.94	0.0186422	0.183583	1
GO:0044786	cell cycle DNA replication	47	4	B9J08_001105,B9J08_001108,B9J08_002979,B9J08_005515,	8.5	3.87	4.26	0.0191244	0.183583	1
GO:0033260	nuclear DNA replication	47	4	B9J08_001105,B9J08_001108,B9J08_002979,B9J08_005515,	8.5	3.87	4.26	0.0191244	0.183583	1
GO:0044237	cellular metabolic process	2514	66	B9J08_000091,B9J08_000102,B9J08_000200,B9J08_000207,B9J08_000328,B9J08_000425,B9J08_000461,B9J08_000476,B9J08_000604,B9J08_000656,B9J08_000698,B9J08_000771,B9J08_000955,B9J08_000965,B9J08_001062,B9J08_001105,B9J08_001108,B9J08_001130,B9J08_001134,B9J08_001220,B9J08_001248,B9J08_001278,B9J08_001420,B9J08_001460,B9J08_001474,B9J08_001710,B9J08_001744,B9J08_001822,B9J08_001885,B9J08_002000,B9J08_002…	2.6	1.19	1.55	0.0204282	0.183583	1
GO:1902969	mitotic DNA replication	27	3	B9J08_001105,B9J08_001108,B9J08_005515,	11.1	5.05	5.69	0.0206436	0.183583	1
GO:0048285	organelle fission	127	7	B9J08_000425,B9J08_001108,B9J08_001130,B9J08_001220,B9J08_001248,B9J08_003057,B9J08_003245,	5.5	2.5	2.71	0.0210876	0.183583	1
GO:1905411	positive regulation of mitotic cohesin unloading	1	1	B9J08_001130,	100	45.44	inf	0.0220085	0.183583	1
GO:1902318	synthesis of RNA primer involved in nuclear cell cycle DNA replication	1	1	B9J08_005515,	100	45.44	inf	0.0220085	0.183583	1
GO:0061668	mitochondrial ribosome assembly	1	1	B9J08_001062,	100	45.44	inf	0.0220085	0.183583	1
GO:0045984	negative regulation of pyrimidine nucleobase metabolic process	1	1	B9J08_002078,	100	45.44	inf	0.0220085	0.183583	1
GO:0051456	attachment of spindle microtubules to kinetochore involved in meiotic sister chromatid segregation	1	1	B9J08_001130,	100	45.44	inf	0.0220085	0.183583	1
GO:0051084	'de novo' posttranslational protein folding	1	1	B9J08_000476,	100	45.44	inf	0.0220085	0.183583	1
GO:0070126	mitochondrial translational termination	1	1	B9J08_000328,	100	45.44	inf	0.0220085	0.183583	1
GO:0070370	cellular heat acclimation	1	1	B9J08_000476,	100	45.44	inf	0.0220085	0.183583	1
GO:0120047	positive regulation of protein localization to medial cortical node	1	1	B9J08_005249,	100	45.44	inf	0.0220085	0.183583	1
GO:0070414	trehalose metabolism in response to heat stress	1	1	B9J08_000476,	100	45.44	inf	0.0220085	0.183583	1
GO:0044718	siderophore transmembrane transport	1	1	B9J08_002110,	100	45.44	inf	0.0220085	0.183583	1
GO:1905410	regulation of mitotic cohesin unloading	1	1	B9J08_001130,	100	45.44	inf	0.0220085	0.183583	1
GO:1900038	negative regulation of cellular response to hypoxia	1	1	B9J08_003216,	100	45.44	inf	0.0220085	0.183583	1
GO:1904776	regulation of protein localization to cell cortex	1	1	B9J08_005249,	100	45.44	inf	0.0220085	0.183583	1
GO:0034659	isopropylmalate transport	1	1	B9J08_000034,	100	45.44	inf	0.0220085	0.183583	1
GO:0061818	tRNA folding	1	1	B9J08_003154,	100	45.44	inf	0.0220085	0.183583	1
GO:0051085	chaperone cofactor-dependent protein refolding	1	1	B9J08_000476,	100	45.44	inf	0.0220085	0.183583	1
GO:0001408	guanine nucleotide transport	1	1	B9J08_005501,	100	45.44	inf	0.0220085	0.183583	1
GO:1902981	synthesis of RNA primer involved in mitotic DNA replication	1	1	B9J08_005515,	100	45.44	inf	0.0220085	0.183583	1
GO:1902295	synthesis of RNA primer involved in cell cycle DNA replication	1	1	B9J08_005515,	100	45.44	inf	0.0220085	0.183583	1
GO:1904778	positive regulation of protein localization to cell cortex	1	1	B9J08_005249,	100	45.44	inf	0.0220085	0.183583	1
GO:1903087	mitotic spindle pole body duplication	1	1	B9J08_003245,	100	45.44	inf	0.0220085	0.183583	1
GO:0010286	heat acclimation	1	1	B9J08_000476,	100	45.44	inf	0.0220085	0.183583	1
GO:0000708	meiotic strand invasion	1	1	B9J08_001108,	100	45.44	inf	0.0220085	0.183583	1
GO:0006142	regulation of pyrimidine nucleobase metabolic process	1	1	B9J08_002078,	100	45.44	inf	0.0220085	0.183583	1
GO:1902775	mitochondrial large ribosomal subunit assembly	1	1	B9J08_001062,	100	45.44	inf	0.0220085	0.183583	1
GO:1902682	protein localization to pericentric heterochromatin	1	1	B9J08_001130,	100	45.44	inf	0.0220085	0.183583	1
GO:0106012	positive regulation of protein localization to medial cortex	1	1	B9J08_005249,	100	45.44	inf	0.0220085	0.183583	1
GO:0015891	siderophore transport	1	1	B9J08_002110,	100	45.44	inf	0.0220085	0.183583	1
GO:0034412	ascospore wall beta-glucan biosynthetic process	1	1	B9J08_005245,	100	45.44	inf	0.0220085	0.183583	1
GO:0034408	ascospore wall beta-glucan metabolic process	1	1	B9J08_005245,	100	45.44	inf	0.0220085	0.183583	1
GO:0015729	oxaloacetate transport	1	1	B9J08_000034,	100	45.44	inf	0.0220085	0.183583	1
GO:0018188	peptidyl-proline di-hydroxylation	1	1	B9J08_003216,	100	45.44	inf	0.0220085	0.183583	1
GO:0120046	regulation of protein localization to medial cortical node	1	1	B9J08_005249,	100	45.44	inf	0.0220085	0.183583	1
GO:0106011	regulation of protein localization to medial cortex	1	1	B9J08_005249,	100	45.44	inf	0.0220085	0.183583	1
GO:0015742	alpha-ketoglutarate transport	1	1	B9J08_004591,	100	45.44	inf	0.0220085	0.183583	1
GO:0048312	intracellular distribution of mitochondria	1	1	B9J08_003245,	100	45.44	inf	0.0220085	0.183583	1
GO:0018126	protein hydroxylation	1	1	B9J08_003216,	100	45.44	inf	0.0220085	0.183583	1
GO:0019511	peptidyl-proline hydroxylation	1	1	B9J08_003216,	100	45.44	inf	0.0220085	0.183583	1
GO:0006950	response to stress	572	20	B9J08_000102,B9J08_000476,B9J08_001105,B9J08_001108,B9J08_001130,B9J08_001220,B9J08_001248,B9J08_002103,B9J08_002224,B9J08_002225,B9J08_002819,B9J08_002979,B9J08_003216,B9J08_003855,B9J08_004153,B9J08_004493,B9J08_004701,B9J08_004918,B9J08_005255,B9J08_005515,	3.5	1.59	1.76	0.0225466	0.186555	1
GO:0051168	nuclear export	101	6	B9J08_000091,B9J08_000102,B9J08_000207,B9J08_002000,B9J08_003107,B9J08_004067,	5.9	2.7	2.92	0.0230934	0.188753	1
GO:0050821	protein stabilization	11	2	B9J08_000207,B9J08_003991,	18.2	8.26	10.05	0.0231802	0.188753	1
GO:0009987	cellular process	3768	91	B9J08_000091,B9J08_000102,B9J08_000200,B9J08_000207,B9J08_000328,B9J08_000425,B9J08_000461,B9J08_000476,B9J08_000555,B9J08_000604,B9J08_000656,B9J08_000698,B9J08_000771,B9J08_000811,B9J08_000951,B9J08_000955,B9J08_000965,B9J08_001062,B9J08_001105,B9J08_001108,B9J08_001130,B9J08_001134,B9J08_001220,B9J08_001248,B9J08_001278,B9J08_001365,B9J08_001420,B9J08_001460,B9J08_001463,B9J08_001474,B9J08_001…	2.4	1.1	1.86	0.0235352	0.190135	1
GO:0065002	intracellular protein transmembrane transport	51	4	B9J08_002819,B9J08_003991,B9J08_004412,B9J08_005023,	7.8	3.56	3.89	0.0250719	0.199409	1
GO:0071806	protein transmembrane transport	51	4	B9J08_002819,B9J08_003991,B9J08_004412,B9J08_005023,	7.8	3.56	3.89	0.0250719	0.199409	1
GO:0098813	nuclear chromosome segregation	104	6	B9J08_001130,B9J08_001220,B9J08_001248,B9J08_002720,B9J08_003057,B9J08_003245,	5.8	2.62	2.83	0.0262379	0.207078	1
GO:0070585	protein localization to mitochondrion	52	4	B9J08_003991,B9J08_004412,B9J08_004728,B9J08_005023,	7.7	3.5	3.81	0.0267145	0.207645	1
GO:0072655	establishment of protein localization to mitochondrion	52	4	B9J08_003991,B9J08_004412,B9J08_004728,B9J08_005023,	7.7	3.5	3.81	0.0267145	0.207645	1
GO:0006835	dicarboxylic acid transport	12	2	B9J08_000034,B9J08_004591,	16.7	7.57	9.04	0.0274219	0.209962	1
GO:0000921	septin ring assembly	12	2	B9J08_002323,B9J08_005249,	16.7	7.57	9.04	0.0274219	0.209962	1
GO:0140014	mitotic nuclear division	78	5	B9J08_001130,B9J08_001220,B9J08_001248,B9J08_003057,B9J08_003245,	6.4	2.91	3.15	0.0278373	0.211564	1
GO:0000027	ribosomal large subunit assembly	31	3	B9J08_001062,B9J08_005015,B9J08_005099,	9.7	4.4	4.87	0.0297859	0.224708	1
GO:0090304	nucleic acid metabolic process	985	30	B9J08_000102,B9J08_000200,B9J08_000207,B9J08_000425,B9J08_000771,B9J08_001062,B9J08_001105,B9J08_001108,B9J08_001130,B9J08_001134,B9J08_001220,B9J08_001248,B9J08_001474,B9J08_002000,B9J08_002103,B9J08_002224,B9J08_002225,B9J08_002979,B9J08_003021,B9J08_003154,B9J08_003155,B9J08_003216,B9J08_003547,B9J08_003855,B9J08_004153,B9J08_004169,B9J08_004918,B9J08_005015,B9J08_005511,B9J08_005515,	3	1.38	1.56	0.0313039	0.234437	1
GO:0007076	mitotic chromosome condensation	13	2	B9J08_001130,B9J08_001248,	15.4	6.99	8.22	0.0319492	0.235826	1
GO:0070071	proton-transporting two-sector ATPase complex assembly	13	2	B9J08_000951,B9J08_004728,	15.4	6.99	8.22	0.0319492	0.235826	1
GO:0016043	cellular component organization	1237	36	B9J08_000328,B9J08_000425,B9J08_000476,B9J08_000951,B9J08_001062,B9J08_001105,B9J08_001108,B9J08_001130,B9J08_001220,B9J08_001248,B9J08_001420,B9J08_001463,B9J08_002022,B9J08_002103,B9J08_002224,B9J08_002323,B9J08_002819,B9J08_002979,B9J08_003057,B9J08_003155,B9J08_003216,B9J08_003245,B9J08_003432,B9J08_003991,B9J08_004412,B9J08_004591,B9J08_004701,B9J08_004728,B9J08_004918,B9J08_005015,B9J08_005…	2.9	1.32	1.51	0.0333074	0.244095	1
GO:0000724	double-strand break repair via homologous recombination	56	4	B9J08_001105,B9J08_001108,B9J08_001248,B9J08_002979,	7.1	3.25	3.52	0.0339215	0.246833	1
GO:0006839	mitochondrial transport	57	4	B9J08_003991,B9J08_004412,B9J08_004728,B9J08_005023,	7	3.19	3.45	0.0358838	0.249343	1
GO:0051276	chromosome organization	343	13	B9J08_001105,B9J08_001108,B9J08_001130,B9J08_001220,B9J08_001248,B9J08_002022,B9J08_002103,B9J08_002224,B9J08_003057,B9J08_003155,B9J08_003245,B9J08_004918,B9J08_005442,	3.8	1.72	1.86	0.0365413	0.249343	1
GO:0006541	glutamine metabolic process	14	2	B9J08_002078,B9J08_002429,	14.3	6.49	7.53	0.0367476	0.249343	1
GO:0032984	protein-containing complex disassembly	58	4	B9J08_000328,B9J08_000476,B9J08_003216,B9J08_003245,	6.9	3.13	3.38	0.0379108	0.249343	1
GO:0000819	sister chromatid segregation	85	5	B9J08_001130,B9J08_001220,B9J08_001248,B9J08_003057,B9J08_003245,	5.9	2.67	2.87	0.0383837	0.249343	1
GO:0042274	ribosomal small subunit biogenesis	115	6	B9J08_000091,B9J08_000207,B9J08_000771,B9J08_002000,B9J08_003021,B9J08_004153,	5.2	2.37	2.54	0.0401691	0.249343	1
GO:0051274	beta-glucan biosynthetic process	15	2	B9J08_002819,B9J08_005245,	13.3	6.06	6.95	0.0418032	0.249343	1
GO:0051101	regulation of DNA binding	15	2	B9J08_001130,B9J08_003216,	13.3	6.06	6.95	0.0418032	0.249343	1
GO:0006415	translational termination	15	2	B9J08_000328,B9J08_003216,	13.3	6.06	6.95	0.0418032	0.249343	1
GO:0070408	carbamoyl phosphate metabolic process	2	1	B9J08_002078,	50	22.72	44.86	0.0435373	0.249343	1
GO:1903775	regulation of DNA double-strand break processing	2	1	B9J08_003855,	50	22.72	44.86	0.0435373	0.249343	1
GO:0071455	cellular response to hyperoxia	2	1	B9J08_003216,	50	22.72	44.86	0.0435373	0.249343	1
GO:1904377	positive regulation of protein localization to cell periphery	2	1	B9J08_005249,	50	22.72	44.86	0.0435373	0.249343	1
GO:1990546	mitochondrial tricarboxylic acid transmembrane transport	2	1	B9J08_004591,	50	22.72	44.86	0.0435373	0.249343	1
GO:1903478	actin filament bundle convergence involved in mitotic contractile ring assembly	2	1	B9J08_001463,	50	22.72	44.86	0.0435373	0.249343	1
GO:0035617	stress granule disassembly	2	1	B9J08_000476,	50	22.72	44.86	0.0435373	0.249343	1
GO:0034088	maintenance of mitotic sister chromatid cohesion	2	1	B9J08_001130,	50	22.72	44.86	0.0435373	0.249343	1
GO:0006529	asparagine biosynthetic process	2	1	B9J08_002429,	50	22.72	44.86	0.0435373	0.249343	1
GO:0006842	tricarboxylic acid transport	2	1	B9J08_004591,	50	22.72	44.86	0.0435373	0.249343	1
GO:0006543	glutamine catabolic process	2	1	B9J08_002078,	50	22.72	44.86	0.0435373	0.249343	1
GO:0000709	meiotic joint molecule formation	2	1	B9J08_001108,	50	22.72	44.86	0.0435373	0.249343	1
GO:0006429	leucyl-tRNA aminoacylation	2	1	B9J08_000200,	50	22.72	44.86	0.0435373	0.249343	1
GO:0006843	mitochondrial citrate transmembrane transport	2	1	B9J08_004591,	50	22.72	44.86	0.0435373	0.249343	1
GO:0015746	citrate transport	2	1	B9J08_004591,	50	22.72	44.86	0.0435373	0.249343	1
GO:0042148	strand invasion	2	1	B9J08_001108,	50	22.72	44.86	0.0435373	0.249343	1
GO:0055093	response to hyperoxia	2	1	B9J08_003216,	50	22.72	44.86	0.0435373	0.249343	1
GO:0036296	response to increased oxygen levels	2	1	B9J08_003216,	50	22.72	44.86	0.0435373	0.249343	1
GO:1905412	negative regulation of mitotic cohesin loading	2	1	B9J08_001130,	50	22.72	44.86	0.0435373	0.249343	1
GO:2000639	negative regulation of SREBP signaling pathway	2	1	B9J08_003216,	50	22.72	44.86	0.0435373	0.249343	1
GO:0034414	tRNA 3'-trailer cleavage, endonucleolytic	2	1	B9J08_003154,	50	22.72	44.86	0.0435373	0.249343	1
GO:0035674	tricarboxylic acid transmembrane transport	2	1	B9J08_004591,	50	22.72	44.86	0.0435373	0.249343	1
GO:0036295	cellular response to increased oxygen levels	2	1	B9J08_003216,	50	22.72	44.86	0.0435373	0.249343	1
GO:0070409	carbamoyl phosphate biosynthetic process	2	1	B9J08_002078,	50	22.72	44.86	0.0435373	0.249343	1
GO:0097355	protein localization to heterochromatin	2	1	B9J08_001130,	50	22.72	44.86	0.0435373	0.249343	1
GO:0071520	actomyosin contractile ring assembly actin filament bundle convergence	2	1	B9J08_001463,	50	22.72	44.86	0.0435373	0.249343	1
GO:0090426	actin filament bundle convergence	2	1	B9J08_001463,	50	22.72	44.86	0.0435373	0.249343	1
GO:0071923	negative regulation of cohesin loading	2	1	B9J08_001130,	50	22.72	44.86	0.0435373	0.249343	1
GO:0034337	RNA folding	2	1	B9J08_003154,	50	22.72	44.86	0.0435373	0.249343	1
GO:0043624	cellular protein complex disassembly	36	3	B9J08_000328,B9J08_003216,B9J08_003245,	8.3	3.79	4.13	0.0437444	0.249343	1
GO:0006310	DNA recombination	118	6	B9J08_000425,B9J08_001105,B9J08_001108,B9J08_001248,B9J08_002979,B9J08_005515,	5.1	2.31	2.47	0.0446532	0.253117	1
GO:0071704	organic substance metabolic process	2549	65	B9J08_000091,B9J08_000102,B9J08_000200,B9J08_000207,B9J08_000328,B9J08_000425,B9J08_000461,B9J08_000476,B9J08_000604,B9J08_000698,B9J08_000771,B9J08_000955,B9J08_000965,B9J08_001062,B9J08_001105,B9J08_001108,B9J08_001130,B9J08_001134,B9J08_001220,B9J08_001248,B9J08_001278,B9J08_001420,B9J08_001460,B9J08_001474,B9J08_001710,B9J08_001822,B9J08_001885,B9J08_002000,B9J08_002078,B9J08_002103,B9J08_002…	2.6	1.16	1.44	0.0456694	0.25706	1
GO:0000725	recombinational repair	62	4	B9J08_001105,B9J08_001108,B9J08_001248,B9J08_002979,	6.5	2.93	3.15	0.046667	0.25706	1
GO:0140013	meiotic nuclear division	62	4	B9J08_000425,B9J08_001108,B9J08_001130,B9J08_001220,	6.5	2.93	3.15	0.046667	0.25706	1
GO:0007533	mating type switching	16	2	B9J08_001108,B9J08_005515,	12.5	5.68	6.45	0.0471027	0.25706	1
GO:0031647	regulation of protein stability	16	2	B9J08_000207,B9J08_003991,	12.5	5.68	6.45	0.0471027	0.25706	1
GO:0072384	organelle transport along microtubule	16	2	B9J08_000811,B9J08_003245,	12.5	5.68	6.45	0.0471027	0.25706	1
GO:0030473	nuclear migration along microtubule	16	2	B9J08_000811,B9J08_003245,	12.5	5.68	6.45	0.0471027	0.25706	1
GO:0000462	maturation of SSU-rRNA from tricistronic rRNA transcript (SSU-rRNA, 5.8S rRNA, LSU-rRNA)	91	5	B9J08_000207,B9J08_000771,B9J08_002000,B9J08_003021,B9J08_004153,	5.5	2.5	2.66	0.0491418	0.26677	1
Molecular function
ID	Name	Bgd count	Result count	Result gene list	Pct of bgd	Fold enrichment	Odds ratio	P-value	Benjamini	Bonferroni
GO:0003735	structural constituent of ribosome	152	23	B9J08_000091,B9J08_000461,B9J08_000604,B9J08_000649,B9J08_000698,B9J08_000771,B9J08_000955,B9J08_001278,B9J08_001460,B9J08_001744,B9J08_001822,B9J08_001885,B9J08_002317,B9J08_003582,B9J08_003634,B9J08_004067,B9J08_004999,B9J08_005005,B9J08_005012,B9J08_005046,B9J08_005099,B9J08_005150,B9J08_005362,	15.1	6.88	9.91	6.55754e-14	1.75086e-11	1.75086e-11
GO:0005198	structural molecule activity	215	26	B9J08_000091,B9J08_000461,B9J08_000604,B9J08_000649,B9J08_000698,B9J08_000771,B9J08_000955,B9J08_001130,B9J08_001278,B9J08_001460,B9J08_001744,B9J08_001822,B9J08_001885,B9J08_002317,B9J08_002323,B9J08_003245,B9J08_003582,B9J08_003634,B9J08_004067,B9J08_004999,B9J08_005005,B9J08_005012,B9J08_005046,B9J08_005099,B9J08_005150,B9J08_005362,	12.1	5.49	7.84	2.8167e-13	3.76029e-11	7.52058e-11
GO:0003723	RNA binding	411	24	B9J08_000200,B9J08_000207,B9J08_000328,B9J08_000698,B9J08_000955,B9J08_000965,B9J08_001062,B9J08_001105,B9J08_001278,B9J08_001420,B9J08_002000,B9J08_003021,B9J08_003154,B9J08_003216,B9J08_003238,B9J08_003432,B9J08_003433,B9J08_003582,B9J08_004067,B9J08_004147,B9J08_004493,B9J08_005015,B9J08_005099,B9J08_005362,	5.8	2.65	3.29	5.86984e-06	0.000522415	0.00156725
GO:0003676	nucleic acid binding	882	36	B9J08_000200,B9J08_000207,B9J08_000328,B9J08_000698,B9J08_000825,B9J08_000955,B9J08_000965,B9J08_001062,B9J08_001105,B9J08_001108,B9J08_001134,B9J08_001278,B9J08_001420,B9J08_001474,B9J08_002000,B9J08_002103,B9J08_002225,B9J08_002979,B9J08_003021,B9J08_003154,B9J08_003155,B9J08_003216,B9J08_003238,B9J08_003432,B9J08_003433,B9J08_003582,B9J08_003991,B9J08_004067,B9J08_004147,B9J08_004169,B9J08_004…	4.1	1.85	2.37	6.90165e-05	0.00460685	0.0184274
GO:1901363	heterocyclic compound binding	1488	51	B9J08_000102,B9J08_000144,B9J08_000200,B9J08_000207,B9J08_000328,B9J08_000476,B9J08_000698,B9J08_000811,B9J08_000825,B9J08_000955,B9J08_000965,B9J08_001062,B9J08_001105,B9J08_001108,B9J08_001134,B9J08_001278,B9J08_001365,B9J08_001420,B9J08_001463,B9J08_001474,B9J08_002000,B9J08_002078,B9J08_002103,B9J08_002225,B9J08_002323,B9J08_002429,B9J08_002819,B9J08_002979,B9J08_003021,B9J08_003154,B9J08_003…	3.4	1.56	2.14	0.000116311	0.00603045	0.031055
GO:0097159	organic cyclic compound binding	1496	51	B9J08_000102,B9J08_000144,B9J08_000200,B9J08_000207,B9J08_000328,B9J08_000476,B9J08_000698,B9J08_000811,B9J08_000825,B9J08_000955,B9J08_000965,B9J08_001062,B9J08_001105,B9J08_001108,B9J08_001134,B9J08_001278,B9J08_001365,B9J08_001420,B9J08_001463,B9J08_001474,B9J08_002000,B9J08_002078,B9J08_002103,B9J08_002225,B9J08_002323,B9J08_002429,B9J08_002819,B9J08_002979,B9J08_003021,B9J08_003154,B9J08_003…	3.4	1.55	2.13	0.000135516	0.00603045	0.0361827
GO:0003697	single-stranded DNA binding	62	7	B9J08_001105,B9J08_001108,B9J08_001474,B9J08_002225,B9J08_002979,B9J08_003991,B9J08_005515,	11.3	5.13	6	0.000371169	0.0141574	0.0991021
GO:0019843	rRNA binding	48	6	B9J08_000698,B9J08_001062,B9J08_003582,B9J08_005015,B9J08_005099,B9J08_005362,	12.5	5.68	6.68	0.000569491	0.0190068	0.152054
GO:0003896	DNA primase activity	3	2	B9J08_001474,B9J08_002225,	66.7	30.29	90.61	0.00141861	0.0335478	0.378769
GO:0008135	translation factor activity, RNA binding	57	6	B9J08_000328,B9J08_000965,B9J08_003238,B9J08_003432,B9J08_003433,B9J08_004147,	10.5	4.78	5.49	0.0014353	0.0335478	0.383226
GO:0016462	pyrophosphatase activity	231	13	B9J08_000102,B9J08_000476,B9J08_001105,B9J08_001108,B9J08_002323,B9J08_002819,B9J08_003238,B9J08_003245,B9J08_003991,B9J08_004147,B9J08_004153,B9J08_004739,B9J08_004918,	5.6	2.56	2.89	0.00149436	0.0335478	0.398994
GO:0017111	nucleoside-triphosphatase activity	206	12	B9J08_000102,B9J08_000476,B9J08_001105,B9J08_001108,B9J08_002323,B9J08_002819,B9J08_003238,B9J08_003245,B9J08_003991,B9J08_004147,B9J08_004153,B9J08_004918,	5.8	2.65	2.98	0.00170757	0.0335478	0.455922
GO:0016818	hydrolase activity, acting on acid anhydrides, in phosphorus-containing anhydrides	235	13	B9J08_000102,B9J08_000476,B9J08_001105,B9J08_001108,B9J08_002323,B9J08_002819,B9J08_003238,B9J08_003245,B9J08_003991,B9J08_004147,B9J08_004153,B9J08_004739,B9J08_004918,	5.5	2.51	2.83	0.00174615	0.0335478	0.466222
GO:0090079	translation regulator activity, nucleic acid binding	60	6	B9J08_000328,B9J08_000965,B9J08_003238,B9J08_003432,B9J08_003433,B9J08_004147,	10	4.54	5.18	0.00187761	0.0335478	0.501321
GO:0016817	hydrolase activity, acting on acid anhydrides	237	13	B9J08_000102,B9J08_000476,B9J08_001105,B9J08_001108,B9J08_002323,B9J08_002819,B9J08_003238,B9J08_003245,B9J08_003991,B9J08_004147,B9J08_004153,B9J08_004739,B9J08_004918,	5.5	2.49	2.81	0.00188471	0.0335478	0.503217
GO:0008097	5S rRNA binding	4	2	B9J08_005015,B9J08_005099,	50	22.72	45.3	0.00279645	0.0466658	0.746653
GO:0045182	translation regulator activity	67	6	B9J08_000328,B9J08_000965,B9J08_003238,B9J08_003432,B9J08_003433,B9J08_004147,	9	4.07	4.58	0.00330655	0.0500692	0.882848
GO:0003688	DNA replication origin binding	29	4	B9J08_001105,B9J08_002979,B9J08_003991,B9J08_005515,	13.8	6.27	7.36	0.003442	0.0500692	0.919015
GO:0051082	unfolded protein binding	68	6	B9J08_000102,B9J08_000476,B9J08_002819,B9J08_003991,B9J08_004701,B9J08_004918,	8.8	4.01	4.5	0.00356298	0.0500692	0.951315
GO:0051087	chaperone binding	16	3	B9J08_000476,B9J08_003991,B9J08_005023,	18.8	8.52	10.53	0.00470688	0.0616811	1
GO:0016779	nucleotidyltransferase activity	74	6	B9J08_001134,B9J08_001474,B9J08_002225,B9J08_003155,B9J08_004169,B9J08_005515,	8.1	3.68	4.1	0.00542401	0.0616811	1
GO:0034062	5'-3' RNA polymerase activity	33	4	B9J08_001134,B9J08_001474,B9J08_002225,B9J08_004169,	12.1	5.51	6.34	0.00554436	0.0616811	1
GO:0097747	RNA polymerase activity	33	4	B9J08_001134,B9J08_001474,B9J08_002225,B9J08_004169,	12.1	5.51	6.34	0.00554436	0.0616811	1
GO:0003899	DNA-directed 5'-3' RNA polymerase activity	33	4	B9J08_001134,B9J08_001474,B9J08_002225,B9J08_004169,	12.1	5.51	6.34	0.00554436	0.0616811	1
GO:0005488	binding	2459	67	B9J08_000102,B9J08_000144,B9J08_000200,B9J08_000207,B9J08_000328,B9J08_000425,B9J08_000461,B9J08_000476,B9J08_000555,B9J08_000698,B9J08_000811,B9J08_000825,B9J08_000951,B9J08_000955,B9J08_000965,B9J08_001062,B9J08_001105,B9J08_001108,B9J08_001134,B9J08_001247,B9J08_001248,B9J08_001278,B9J08_001365,B9J08_001420,B9J08_001463,B9J08_001474,B9J08_001710,B9J08_001744,B9J08_002000,B9J08_002022,B9J08_002…	2.7	1.24	1.7	0.00640622	0.0684184	1
GO:0016887	ATP hydrolysis activity	131	8	B9J08_000102,B9J08_000476,B9J08_001105,B9J08_001108,B9J08_002819,B9J08_003991,B9J08_004153,B9J08_004918,	6.1	2.77	3.05	0.00777234	0.079816	1
GO:0005515	protein binding	780	27	B9J08_000102,B9J08_000207,B9J08_000425,B9J08_000476,B9J08_000811,B9J08_000951,B9J08_000965,B9J08_001134,B9J08_001247,B9J08_001248,B9J08_001463,B9J08_001710,B9J08_002022,B9J08_002224,B9J08_002489,B9J08_002819,B9J08_003021,B9J08_003432,B9J08_003433,B9J08_003991,B9J08_004169,B9J08_004493,B9J08_004701,B9J08_004918,B9J08_005023,B9J08_005255,B9J08_005442,	3.5	1.57	1.8	0.00870469	0.0860797	1
GO:0003674	molecular function	3881	94	B9J08_000034,B9J08_000091,B9J08_000102,B9J08_000144,B9J08_000200,B9J08_000207,B9J08_000328,B9J08_000425,B9J08_000461,B9J08_000476,B9J08_000555,B9J08_000604,B9J08_000649,B9J08_000656,B9J08_000698,B9J08_000771,B9J08_000811,B9J08_000825,B9J08_000951,B9J08_000955,B9J08_000965,B9J08_001062,B9J08_001105,B9J08_001108,B9J08_001130,B9J08_001134,B9J08_001247,B9J08_001248,B9J08_001278,B9J08_001365,B9J08_001…	2.4	1.1	2.18	0.0115284	0.109931	1
GO:0043177	organic acid binding	8	2	B9J08_002078,B9J08_003216,	25	11.36	15.09	0.012319	0.11342	1
GO:0000166	nucleotide binding	746	25	B9J08_000102,B9J08_000144,B9J08_000200,B9J08_000476,B9J08_000811,B9J08_001062,B9J08_001105,B9J08_001108,B9J08_001365,B9J08_001463,B9J08_002078,B9J08_002323,B9J08_002429,B9J08_002819,B9J08_003154,B9J08_003238,B9J08_003245,B9J08_003433,B9J08_003991,B9J08_004147,B9J08_004153,B9J08_004701,B9J08_004918,B9J08_005249,B9J08_005515,	3.4	1.52	1.71	0.0174824	0.127745	1
GO:1901265	nucleoside phosphate binding	746	25	B9J08_000102,B9J08_000144,B9J08_000200,B9J08_000476,B9J08_000811,B9J08_001062,B9J08_001105,B9J08_001108,B9J08_001365,B9J08_001463,B9J08_002078,B9J08_002323,B9J08_002429,B9J08_002819,B9J08_003154,B9J08_003238,B9J08_003245,B9J08_003433,B9J08_003991,B9J08_004147,B9J08_004153,B9J08_004701,B9J08_004918,B9J08_005249,B9J08_005515,	3.4	1.52	1.71	0.0174824	0.127745	1
GO:0097367	carbohydrate derivative binding	608	21	B9J08_000102,B9J08_000200,B9J08_000476,B9J08_000811,B9J08_001062,B9J08_001105,B9J08_001108,B9J08_001463,B9J08_002078,B9J08_002323,B9J08_002429,B9J08_002819,B9J08_003238,B9J08_003245,B9J08_003991,B9J08_004147,B9J08_004153,B9J08_004701,B9J08_004918,B9J08_005249,B9J08_005515,	3.5	1.57	1.74	0.0219928	0.127745	1
GO:0015319	sodium:inorganic phosphate symporter activity	1	1	B9J08_002202,	100	45.44	inf	0.0220085	0.127745	1
GO:0015131	oxaloacetate transmembrane transporter activity	1	1	B9J08_000034,	100	45.44	inf	0.0220085	0.127745	1
GO:0001409	guanine nucleotide transmembrane transporter activity	1	1	B9J08_005501,	100	45.44	inf	0.0220085	0.127745	1
GO:0030899	calcium-dependent ATPase activity	1	1	B9J08_001463,	100	45.44	inf	0.0220085	0.127745	1
GO:1901239	malonate(1-) transmembrane transporter activity	1	1	B9J08_000034,	100	45.44	inf	0.0220085	0.127745	1
GO:0061629	RNA polymerase II-specific DNA-binding transcription factor binding	1	1	B9J08_001134,	100	45.44	inf	0.0220085	0.127745	1
GO:1905334	Swi5-Sfr1 complex binding	1	1	B9J08_001108,	100	45.44	inf	0.0220085	0.127745	1
GO:0004070	aspartate carbamoyltransferase activity	1	1	B9J08_002078,	100	45.44	inf	0.0220085	0.127745	1
GO:0005436	sodium:phosphate symporter activity	1	1	B9J08_002202,	100	45.44	inf	0.0220085	0.127745	1
GO:0034658	isopropylmalate transmembrane transporter activity	1	1	B9J08_000034,	100	45.44	inf	0.0220085	0.127745	1
GO:0031543	peptidyl-proline dioxygenase activity	1	1	B9J08_003216,	100	45.44	inf	0.0220085	0.127745	1
GO:0015343	siderophore transmembrane transporter activity	1	1	B9J08_002110,	100	45.44	inf	0.0220085	0.127745	1
GO:1990400	mitochondrial ribosomal large subunit rRNA binding	1	1	B9J08_001062,	100	45.44	inf	0.0220085	0.127745	1
GO:0140297	DNA-binding transcription factor binding	1	1	B9J08_001134,	100	45.44	inf	0.0220085	0.127745	1
GO:0035639	purine ribonucleoside triphosphate binding	575	20	B9J08_000102,B9J08_000200,B9J08_000476,B9J08_000811,B9J08_001062,B9J08_001105,B9J08_001108,B9J08_001463,B9J08_002078,B9J08_002323,B9J08_002429,B9J08_002819,B9J08_003238,B9J08_003245,B9J08_003991,B9J08_004147,B9J08_004153,B9J08_004701,B9J08_004918,B9J08_005249,	3.5	1.58	1.75	0.023729	0.133825	1
GO:0036094	small molecule binding	808	26	B9J08_000102,B9J08_000144,B9J08_000200,B9J08_000476,B9J08_000811,B9J08_001062,B9J08_001105,B9J08_001108,B9J08_001365,B9J08_001463,B9J08_002078,B9J08_002323,B9J08_002429,B9J08_002819,B9J08_003154,B9J08_003216,B9J08_003238,B9J08_003245,B9J08_003433,B9J08_003991,B9J08_004147,B9J08_004153,B9J08_004701,B9J08_004918,B9J08_005249,B9J08_005515,	3.2	1.46	1.64	0.0247618	0.133825	1
GO:0032555	purine ribonucleotide binding	580	20	B9J08_000102,B9J08_000200,B9J08_000476,B9J08_000811,B9J08_001062,B9J08_001105,B9J08_001108,B9J08_001463,B9J08_002078,B9J08_002323,B9J08_002429,B9J08_002819,B9J08_003238,B9J08_003245,B9J08_003991,B9J08_004147,B9J08_004153,B9J08_004701,B9J08_004918,B9J08_005249,	3.4	1.57	1.73	0.0258061	0.133825	1
GO:0003727	single-stranded RNA binding	30	3	B9J08_001105,B9J08_003154,B9J08_003216,	10	4.54	5.06	0.0273301	0.133825	1
GO:0001054	RNA polymerase I activity	12	2	B9J08_001134,B9J08_004169,	16.7	7.57	9.04	0.0274219	0.133825	1
GO:0003774	cytoskeletal motor activity	12	2	B9J08_000811,B9J08_001463,	16.7	7.57	9.04	0.0274219	0.133825	1
GO:0003887	DNA-directed DNA polymerase activity	12	2	B9J08_003155,B9J08_005515,	16.7	7.57	9.04	0.0274219	0.133825	1
GO:0005200	structural constituent of cytoskeleton	12	2	B9J08_002323,B9J08_003245,	16.7	7.57	9.04	0.0274219	0.133825	1
GO:0017076	purine nucleotide binding	584	20	B9J08_000102,B9J08_000200,B9J08_000476,B9J08_000811,B9J08_001062,B9J08_001105,B9J08_001108,B9J08_001463,B9J08_002078,B9J08_002323,B9J08_002429,B9J08_002819,B9J08_003238,B9J08_003245,B9J08_003991,B9J08_004147,B9J08_004153,B9J08_004701,B9J08_004918,B9J08_005249,	3.4	1.56	1.71	0.0275669	0.133825	1
GO:0032553	ribonucleotide binding	599	20	B9J08_000102,B9J08_000200,B9J08_000476,B9J08_000811,B9J08_001062,B9J08_001105,B9J08_001108,B9J08_001463,B9J08_002078,B9J08_002323,B9J08_002429,B9J08_002819,B9J08_003238,B9J08_003245,B9J08_003991,B9J08_004147,B9J08_004153,B9J08_004701,B9J08_004918,B9J08_005249,	3.3	1.52	1.66	0.0350029	0.164504	1
GO:0003746	translation elongation factor activity	14	2	B9J08_003238,B9J08_004147,	14.3	6.49	7.53	0.0367476	0.164504	1
GO:0140657	ATP-dependent activity	276	11	B9J08_000102,B9J08_000476,B9J08_000811,B9J08_001062,B9J08_001105,B9J08_001108,B9J08_001463,B9J08_002819,B9J08_003991,B9J08_004153,B9J08_004918,	4	1.81	1.95	0.0389035	0.164504	1
GO:0034061	DNA polymerase activity	15	2	B9J08_003155,B9J08_005515,	13.3	6.06	6.95	0.0418032	0.164504	1
GO:0003922	GMP synthase (glutamine-hydrolyzing) activity	2	1	B9J08_002078,	50	22.72	44.86	0.0435373	0.164504	1
GO:0005094	Rho GDP-dissociation inhibitor activity	2	1	B9J08_000555,	50	22.72	44.86	0.0435373	0.164504	1
GO:0004066	asparagine synthase (glutamine-hydrolyzing) activity	2	1	B9J08_002429,	50	22.72	44.86	0.0435373	0.164504	1
GO:0140597	protein carrier chaperone	2	1	B9J08_004728,	50	22.72	44.86	0.0435373	0.164504	1
GO:0005371	tricarboxylate secondary active transmembrane transporter activity	2	1	B9J08_004591,	50	22.72	44.86	0.0435373	0.164504	1
GO:0016743	carboxyl- or carbamoyltransferase activity	2	1	B9J08_002078,	50	22.72	44.86	0.0435373	0.164504	1
GO:0032033	myosin II light chain binding	2	1	B9J08_001463,	50	22.72	44.86	0.0435373	0.164504	1
GO:0032977	membrane insertase activity	2	1	B9J08_004728,	50	22.72	44.86	0.0435373	0.164504	1
GO:0032027	myosin light chain binding	2	1	B9J08_001463,	50	22.72	44.86	0.0435373	0.164504	1
GO:0004823	leucine-tRNA ligase activity	2	1	B9J08_000200,	50	22.72	44.86	0.0435373	0.164504	1
GO:0043531	ADP binding	2	1	B9J08_000476,	50	22.72	44.86	0.0435373	0.164504	1
GO:0003743	translation initiation factor activity	36	3	B9J08_000965,B9J08_003432,B9J08_003433,	8.3	3.79	4.13	0.0437444	0.164504	1
Cellular component
ID	Name	Bgd count	Result count	Result gene list	Pct of bgd	Fold enrichment	Odds ratio	P-value	Benjamini	Bonferroni
GO:0043232	intracellular non-membrane-bounded organelle	986	60	B9J08_000091,B9J08_000102,B9J08_000207,B9J08_000461,B9J08_000604,B9J08_000649,B9J08_000698,B9J08_000771,B9J08_000811,B9J08_000955,B9J08_000965,B9J08_001105,B9J08_001108,B9J08_001130,B9J08_001134,B9J08_001220,B9J08_001248,B9J08_001278,B9J08_001460,B9J08_001463,B9J08_001474,B9J08_001744,B9J08_001822,B9J08_001885,B9J08_002000,B9J08_002022,B9J08_002224,B9J08_002225,B9J08_002317,B9J08_002323,B9J08_002…	6.1	2.76	5.5	9.27932e-17	1.09032e-14	2.18064e-14
GO:0043228	non-membrane-bounded organelle	986	60	B9J08_000091,B9J08_000102,B9J08_000207,B9J08_000461,B9J08_000604,B9J08_000649,B9J08_000698,B9J08_000771,B9J08_000811,B9J08_000955,B9J08_000965,B9J08_001105,B9J08_001108,B9J08_001130,B9J08_001134,B9J08_001220,B9J08_001248,B9J08_001278,B9J08_001460,B9J08_001463,B9J08_001474,B9J08_001744,B9J08_001822,B9J08_001885,B9J08_002000,B9J08_002022,B9J08_002224,B9J08_002225,B9J08_002317,B9J08_002323,B9J08_002…	6.1	2.76	5.5	9.27932e-17	1.09032e-14	2.18064e-14
GO:0005840	ribosome	183	25	B9J08_000091,B9J08_000461,B9J08_000604,B9J08_000649,B9J08_000698,B9J08_000771,B9J08_000955,B9J08_000965,B9J08_001278,B9J08_001460,B9J08_001744,B9J08_001822,B9J08_001885,B9J08_002317,B9J08_003107,B9J08_003582,B9J08_003634,B9J08_004067,B9J08_004999,B9J08_005005,B9J08_005012,B9J08_005046,B9J08_005099,B9J08_005150,B9J08_005362,	13.7	6.21	8.96	5.09682e-14	3.99251e-12	1.19775e-11
GO:0044391	ribosomal subunit	146	20	B9J08_000091,B9J08_000649,B9J08_000698,B9J08_000771,B9J08_000955,B9J08_000965,B9J08_001278,B9J08_001460,B9J08_001744,B9J08_001822,B9J08_001885,B9J08_002317,B9J08_003634,B9J08_004067,B9J08_004999,B9J08_005005,B9J08_005012,B9J08_005046,B9J08_005099,B9J08_005362,	13.7	6.22	8.51	2.37281e-11	1.39402e-09	5.5761e-09
GO:0043233	organelle lumen	767	42	B9J08_000207,B9J08_000425,B9J08_000476,B9J08_000649,B9J08_000698,B9J08_001062,B9J08_001105,B9J08_001108,B9J08_001130,B9J08_001134,B9J08_001220,B9J08_001248,B9J08_001460,B9J08_001474,B9J08_001710,B9J08_001744,B9J08_001822,B9J08_002000,B9J08_002224,B9J08_002225,B9J08_002317,B9J08_002819,B9J08_002979,B9J08_003021,B9J08_003057,B9J08_003154,B9J08_003155,B9J08_003855,B9J08_003991,B9J08_004169,B9J08_004…	5.5	2.49	3.66	2.16155e-09	7.25664e-08	5.07965e-07
GO:0031974	membrane-enclosed lumen	767	42	B9J08_000207,B9J08_000425,B9J08_000476,B9J08_000649,B9J08_000698,B9J08_001062,B9J08_001105,B9J08_001108,B9J08_001130,B9J08_001134,B9J08_001220,B9J08_001248,B9J08_001460,B9J08_001474,B9J08_001710,B9J08_001744,B9J08_001822,B9J08_002000,B9J08_002224,B9J08_002225,B9J08_002317,B9J08_002819,B9J08_002979,B9J08_003021,B9J08_003057,B9J08_003154,B9J08_003155,B9J08_003855,B9J08_003991,B9J08_004169,B9J08_004…	5.5	2.49	3.66	2.16155e-09	7.25664e-08	5.07965e-07
GO:0070013	intracellular organelle lumen	767	42	B9J08_000207,B9J08_000425,B9J08_000476,B9J08_000649,B9J08_000698,B9J08_001062,B9J08_001105,B9J08_001108,B9J08_001130,B9J08_001134,B9J08_001220,B9J08_001248,B9J08_001460,B9J08_001474,B9J08_001710,B9J08_001744,B9J08_001822,B9J08_002000,B9J08_002224,B9J08_002225,B9J08_002317,B9J08_002819,B9J08_002979,B9J08_003021,B9J08_003057,B9J08_003154,B9J08_003155,B9J08_003855,B9J08_003991,B9J08_004169,B9J08_004…	5.5	2.49	3.66	2.16155e-09	7.25664e-08	5.07965e-07
GO:1990904	ribonucleoprotein complex	406	29	B9J08_000091,B9J08_000102,B9J08_000207,B9J08_000649,B9J08_000698,B9J08_000771,B9J08_000955,B9J08_000965,B9J08_001278,B9J08_001420,B9J08_001460,B9J08_001744,B9J08_001822,B9J08_001885,B9J08_002000,B9J08_002317,B9J08_003021,B9J08_003154,B9J08_003432,B9J08_003547,B9J08_003634,B9J08_003991,B9J08_004067,B9J08_004999,B9J08_005005,B9J08_005012,B9J08_005046,B9J08_005099,B9J08_005362,	7.1	3.25	4.37	5.01894e-09	1.47431e-07	1.17945e-06
GO:0005759	mitochondrial matrix	175	18	B9J08_000425,B9J08_000649,B9J08_000698,B9J08_001062,B9J08_001108,B9J08_001460,B9J08_001744,B9J08_001822,B9J08_002317,B9J08_003991,B9J08_004412,B9J08_004591,B9J08_004701,B9J08_005005,B9J08_005012,B9J08_005023,B9J08_005046,B9J08_005362,	10.3	4.67	5.96	2.94366e-08	7.68622e-07	6.9176e-06
GO:0005658	alpha DNA polymerase:primase complex	4	4	B9J08_001474,B9J08_002225,B9J08_003155,B9J08_005515,	100	45.44	inf	2.21479e-07	5.20475e-06	5.20475e-05
GO:0015935	small ribosomal subunit	55	9	B9J08_000091,B9J08_000649,B9J08_000771,B9J08_000965,B9J08_001744,B9J08_001822,B9J08_004067,B9J08_005012,B9J08_005362,	16.4	7.44	9.43	2.33741e-06	4.99355e-05	0.000549291
GO:0022626	cytosolic ribosome	73	10	B9J08_000091,B9J08_000771,B9J08_000955,B9J08_000965,B9J08_001278,B9J08_001885,B9J08_003634,B9J08_004067,B9J08_004999,B9J08_005099,	13.7	6.22	7.7	3.36654e-06	6.5928e-05	0.000791136
GO:0015934	large ribosomal subunit	91	11	B9J08_000698,B9J08_000955,B9J08_001278,B9J08_001460,B9J08_001885,B9J08_002317,B9J08_003634,B9J08_004999,B9J08_005005,B9J08_005046,B9J08_005099,	12.1	5.49	6.72	3.74745e-06	6.77423e-05	0.00088065
GO:0005761	mitochondrial ribosome	78	10	B9J08_000649,B9J08_000698,B9J08_001460,B9J08_001744,B9J08_001822,B9J08_002317,B9J08_005005,B9J08_005012,B9J08_005046,B9J08_005362,	12.8	5.83	7.13	6.2218e-06	9.74748e-05	0.00146212
GO:0000313	organellar ribosome	78	10	B9J08_000649,B9J08_000698,B9J08_001460,B9J08_001744,B9J08_001822,B9J08_002317,B9J08_005005,B9J08_005012,B9J08_005046,B9J08_005362,	12.8	5.83	7.13	6.2218e-06	9.74748e-05	0.00146212
GO:0043229	intracellular organelle	2830	83	B9J08_000034,B9J08_000091,B9J08_000102,B9J08_000200,B9J08_000207,B9J08_000328,B9J08_000425,B9J08_000461,B9J08_000476,B9J08_000604,B9J08_000649,B9J08_000698,B9J08_000771,B9J08_000811,B9J08_000951,B9J08_000955,B9J08_000965,B9J08_001062,B9J08_001105,B9J08_001108,B9J08_001130,B9J08_001134,B9J08_001220,B9J08_001248,B9J08_001278,B9J08_001365,B9J08_001420,B9J08_001460,B9J08_001463,B9J08_001474,B9J08_001…	2.9	1.33	2.76	8.38196e-06	0.000122072	0.00196976
GO:0032991	protein-containing complex	1653	58	B9J08_000091,B9J08_000102,B9J08_000207,B9J08_000476,B9J08_000555,B9J08_000649,B9J08_000698,B9J08_000771,B9J08_000811,B9J08_000955,B9J08_000965,B9J08_001105,B9J08_001130,B9J08_001134,B9J08_001220,B9J08_001248,B9J08_001278,B9J08_001420,B9J08_001460,B9J08_001463,B9J08_001474,B9J08_001710,B9J08_001744,B9J08_001822,B9J08_001885,B9J08_002000,B9J08_002022,B9J08_002224,B9J08_002225,B9J08_002317,B9J08_002…	3.5	1.59	2.41	8.83077e-06	0.000122072	0.00207523
GO:0043226	organelle	2837	83	B9J08_000034,B9J08_000091,B9J08_000102,B9J08_000200,B9J08_000207,B9J08_000328,B9J08_000425,B9J08_000461,B9J08_000476,B9J08_000604,B9J08_000649,B9J08_000698,B9J08_000771,B9J08_000811,B9J08_000951,B9J08_000955,B9J08_000965,B9J08_001062,B9J08_001105,B9J08_001108,B9J08_001130,B9J08_001134,B9J08_001220,B9J08_001248,B9J08_001278,B9J08_001365,B9J08_001420,B9J08_001460,B9J08_001463,B9J08_001474,B9J08_001…	2.9	1.33	2.75	9.59443e-06	0.000125261	0.00225469
GO:0005622	intracellular anatomical structure	3186	89	B9J08_000034,B9J08_000091,B9J08_000102,B9J08_000200,B9J08_000207,B9J08_000328,B9J08_000425,B9J08_000461,B9J08_000476,B9J08_000555,B9J08_000604,B9J08_000649,B9J08_000698,B9J08_000771,B9J08_000811,B9J08_000951,B9J08_000955,B9J08_000965,B9J08_001062,B9J08_001105,B9J08_001108,B9J08_001130,B9J08_001134,B9J08_001220,B9J08_001248,B9J08_001278,B9J08_001365,B9J08_001420,B9J08_001460,B9J08_001463,B9J08_001…	2.8	1.27	3.04	1.32229e-05	0.000163546	0.00310738
GO:0043596	nuclear replication fork	40	7	B9J08_001105,B9J08_001220,B9J08_001474,B9J08_002224,B9J08_002225,B9J08_003155,B9J08_005515,	17.5	7.95	10.04	2.09247e-05	0.000245865	0.0049173
GO:0043601	nuclear replisome	10	4	B9J08_001474,B9J08_002225,B9J08_003155,B9J08_005515,	40	18.17	30.78	4.19855e-05	0.000469838	0.00986659
GO:0000228	nuclear chromosome	127	11	B9J08_001105,B9J08_001108,B9J08_001130,B9J08_001220,B9J08_001248,B9J08_001474,B9J08_002224,B9J08_002225,B9J08_003057,B9J08_003155,B9J08_005515,	8.7	3.94	4.6	9.11003e-05	0.000973117	0.0214086
GO:0042575	DNA polymerase complex	13	4	B9J08_001474,B9J08_002225,B9J08_003155,B9J08_005515,	30.8	13.98	20.51	0.000135836	0.00128609	0.0319215
GO:0030894	replisome	13	4	B9J08_001474,B9J08_002225,B9J08_003155,B9J08_005515,	30.8	13.98	20.51	0.000135836	0.00128609	0.0319215
GO:0005657	replication fork	53	7	B9J08_001105,B9J08_001220,B9J08_001474,B9J08_002224,B9J08_002225,B9J08_003155,B9J08_005515,	13.2	6	7.18	0.000136818	0.00128609	0.0321522
GO:0031981	nuclear lumen	504	24	B9J08_000207,B9J08_000476,B9J08_001105,B9J08_001108,B9J08_001130,B9J08_001134,B9J08_001220,B9J08_001248,B9J08_001474,B9J08_001710,B9J08_002000,B9J08_002224,B9J08_002225,B9J08_002979,B9J08_003021,B9J08_003057,B9J08_003154,B9J08_003155,B9J08_003855,B9J08_004169,B9J08_005015,B9J08_005442,B9J08_005511,B9J08_005515,	4.8	2.16	2.59	0.000171906	0.00155377	0.0403979
GO:0098798	mitochondrial protein-containing complex	166	12	B9J08_000649,B9J08_000698,B9J08_001460,B9J08_001744,B9J08_001822,B9J08_002317,B9J08_004412,B9J08_005005,B9J08_005012,B9J08_005023,B9J08_005046,B9J08_005362,	7.2	3.28	3.79	0.000245963	0.00214079	0.0578013
GO:0022625	cytosolic large ribosomal subunit	44	6	B9J08_000955,B9J08_001278,B9J08_001885,B9J08_003634,B9J08_004999,B9J08_005099,	13.6	6.2	7.39	0.000351754	0.00295222	0.0826621
GO:0005739	mitochondrion	601	26	B9J08_000034,B9J08_000200,B9J08_000328,B9J08_000425,B9J08_000649,B9J08_000698,B9J08_000951,B9J08_001062,B9J08_001108,B9J08_001248,B9J08_001460,B9J08_001744,B9J08_001822,B9J08_002317,B9J08_003238,B9J08_003991,B9J08_004147,B9J08_004412,B9J08_004591,B9J08_004701,B9J08_004728,B9J08_005005,B9J08_005012,B9J08_005023,B9J08_005046,B9J08_005362,	4.3	1.97	2.35	0.000412507	0.00326652	0.0969391
GO:0000314	organellar small ribosomal subunit	30	5	B9J08_000649,B9J08_001744,B9J08_001822,B9J08_005012,B9J08_005362,	16.7	7.57	9.29	0.000430902	0.00326652	0.101262
GO:0005763	mitochondrial small ribosomal subunit	30	5	B9J08_000649,B9J08_001744,B9J08_001822,B9J08_005012,B9J08_005362,	16.7	7.57	9.29	0.000430902	0.00326652	0.101262
GO:0000794	condensed nuclear chromosome	18	4	B9J08_001108,B9J08_001130,B9J08_001248,B9J08_003057,	22.2	10.1	13.17	0.00053403	0.00392179	0.125497
GO:0032993	protein-DNA complex	54	6	B9J08_001105,B9J08_001474,B9J08_002225,B9J08_002979,B9J08_003155,B9J08_005515,	11.1	5.05	5.84	0.00107739	0.00767232	0.253187
GO:0005694	chromosome	293	15	B9J08_001105,B9J08_001108,B9J08_001130,B9J08_001220,B9J08_001248,B9J08_001474,B9J08_002022,B9J08_002224,B9J08_002225,B9J08_002720,B9J08_003021,B9J08_003057,B9J08_003155,B9J08_003855,B9J08_005515,	5.1	2.33	2.64	0.00167221	0.0112492	0.39297
GO:0022627	cytosolic small ribosomal subunit	24	4	B9J08_000091,B9J08_000771,B9J08_000965,B9J08_004067,	16.7	7.57	9.21	0.00167541	0.0112492	0.393721
GO:0110165	cellular anatomical entity	3819	95	B9J08_000034,B9J08_000091,B9J08_000102,B9J08_000200,B9J08_000207,B9J08_000328,B9J08_000425,B9J08_000461,B9J08_000476,B9J08_000555,B9J08_000604,B9J08_000649,B9J08_000698,B9J08_000771,B9J08_000811,B9J08_000951,B9J08_000955,B9J08_000965,B9J08_001062,B9J08_001105,B9J08_001108,B9J08_001130,B9J08_001134,B9J08_001220,B9J08_001248,B9J08_001278,B9J08_001365,B9J08_001420,B9J08_001460,B9J08_001463,B9J08_001…	2.5	1.13	2.72	0.00178506	0.0116525	0.41949
GO:0000315	organellar large ribosomal subunit	44	5	B9J08_000698,B9J08_001460,B9J08_002317,B9J08_005005,B9J08_005046,	11.4	5.16	5.94	0.0025731	0.0159126	0.604679
GO:0005762	mitochondrial large ribosomal subunit	44	5	B9J08_000698,B9J08_001460,B9J08_002317,B9J08_005005,B9J08_005046,	11.4	5.16	5.94	0.0025731	0.0159126	0.604679
GO:0030892	mitotic cohesin complex	4	2	B9J08_001248,B9J08_003057,	50	22.72	45.3	0.00279645	0.0160284	0.657166
GO:0000798	nuclear cohesin complex	4	2	B9J08_001248,B9J08_003057,	50	22.72	45.3	0.00279645	0.0160284	0.657166
GO:0034990	nuclear mitotic cohesin complex	4	2	B9J08_001248,B9J08_003057,	50	22.72	45.3	0.00279645	0.0160284	0.657166
GO:0005575	cellular component	3870	95	B9J08_000034,B9J08_000091,B9J08_000102,B9J08_000200,B9J08_000207,B9J08_000328,B9J08_000425,B9J08_000461,B9J08_000476,B9J08_000555,B9J08_000604,B9J08_000649,B9J08_000698,B9J08_000771,B9J08_000811,B9J08_000951,B9J08_000955,B9J08_000965,B9J08_001062,B9J08_001105,B9J08_001108,B9J08_001130,B9J08_001134,B9J08_001220,B9J08_001248,B9J08_001278,B9J08_001365,B9J08_001420,B9J08_001460,B9J08_001463,B9J08_001…	2.5	1.12	2.52	0.00406365	0.0225158	0.954958
GO:0055029	nuclear DNA-directed RNA polymerase complex	70	6	B9J08_001134,B9J08_001474,B9J08_002225,B9J08_003155,B9J08_004169,B9J08_005515,	8.6	3.89	4.36	0.00411992	0.0225158	0.968181
GO:0001405	PAM complex, Tim23 associated import motor	5	2	B9J08_004412,B9J08_005023,	40	18.17	30.19	0.00459389	0.0232011	1
GO:0036391	medial cortex septin ring	5	2	B9J08_001463,B9J08_002323,	40	18.17	30.19	0.00459389	0.0232011	1
GO:0008278	cohesin complex	5	2	B9J08_001248,B9J08_003057,	40	18.17	30.19	0.00459389	0.0232011	1
GO:0030880	RNA polymerase complex	72	6	B9J08_001134,B9J08_001474,B9J08_002225,B9J08_003155,B9J08_004169,B9J08_005515,	8.3	3.79	4.23	0.00473894	0.0232011	1
GO:0000428	DNA-directed RNA polymerase complex	72	6	B9J08_001134,B9J08_001474,B9J08_002225,B9J08_003155,B9J08_004169,B9J08_005515,	8.3	3.79	4.23	0.00473894	0.0232011	1
GO:0071341	medial cortical node	6	2	B9J08_001463,B9J08_005249,	33.3	15.15	22.64	0.00679215	0.0325746	1
GO:0000793	condensed chromosome	58	5	B9J08_001108,B9J08_001130,B9J08_001248,B9J08_002720,B9J08_003057,	8.6	3.92	4.36	0.00851918	0.0400401	1
GO:0031298	replication fork protection complex	21	3	B9J08_001105,B9J08_001220,B9J08_002224,	14.3	6.49	7.6	0.0103228	0.0475659	1
GO:0031097	medial cortex	22	3	B9J08_001463,B9J08_002323,B9J08_005249,	13.6	6.2	7.2	0.0117643	0.0531658	1
GO:0005737	cytoplasm	2241	61	B9J08_000034,B9J08_000091,B9J08_000102,B9J08_000200,B9J08_000328,B9J08_000425,B9J08_000476,B9J08_000555,B9J08_000649,B9J08_000698,B9J08_000771,B9J08_000811,B9J08_000951,B9J08_000955,B9J08_000965,B9J08_001062,B9J08_001105,B9J08_001108,B9J08_001130,B9J08_001248,B9J08_001278,B9J08_001365,B9J08_001420,B9J08_001460,B9J08_001463,B9J08_001474,B9J08_001744,B9J08_001822,B9J08_001885,B9J08_002078,B9J08_002…	2.7	1.24	1.6	0.0128361	0.0569146	1
GO:0005829	cytosol	372	15	B9J08_000091,B9J08_000102,B9J08_000476,B9J08_000771,B9J08_000955,B9J08_000965,B9J08_001130,B9J08_001278,B9J08_001463,B9J08_001885,B9J08_003057,B9J08_003634,B9J08_004067,B9J08_004999,B9J08_005099,	4	1.83	2.01	0.0151979	0.0643698	1
GO:0061695	transferase complex, transferring phosphorus-containing groups	119	7	B9J08_001134,B9J08_001474,B9J08_002225,B9J08_003155,B9J08_004169,B9J08_005249,B9J08_005515,	5.9	2.67	2.91	0.0152385	0.0643698	1
GO:0005852	eukaryotic translation initiation factor 3 complex	9	2	B9J08_003432,B9J08_003433,	22.2	10.1	12.93	0.0156131	0.0643698	1
GO:0120104	mitotic actomyosin contractile ring, proximal layer	9	2	B9J08_001463,B9J08_002323,	22.2	10.1	12.93	0.0156131	0.0643698	1
GO:0005744	TIM23 mitochondrial import inner membrane translocase complex	10	2	B9J08_004412,B9J08_005023,	20	9.09	11.31	0.0192388	0.0779502	1
GO:0110115	Cdr2 medial cortical node complex	1	1	B9J08_005249,	100	45.44	inf	0.0220085	0.0820954	1
GO:0140453	protein aggregate center	1	1	B9J08_004918,	100	45.44	inf	0.0220085	0.0820954	1
GO:0099020	perinuclear endoplasmic reticulum lumen	1	1	B9J08_002819,	100	45.44	inf	0.0220085	0.0820954	1
GO:0099021	cortical endoplasmic reticulum lumen	1	1	B9J08_002819,	100	45.44	inf	0.0220085	0.0820954	1
GO:0035808	meiotic recombination initiation complex	1	1	B9J08_001130,	100	45.44	inf	0.0220085	0.0820954	1
GO:0090734	site of DNA damage	28	3	B9J08_001108,B9J08_003855,B9J08_005515,	10.7	4.87	5.46	0.0227587	0.0822816	1
GO:0035861	site of double-strand break	28	3	B9J08_001108,B9J08_003855,B9J08_005515,	10.7	4.87	5.46	0.0227587	0.0822816	1
GO:0005736	RNA polymerase I complex	12	2	B9J08_001134,B9J08_004169,	16.7	7.57	9.04	0.0274219	0.0976387	1
GO:0031225	anchored component of membrane	14	2	B9J08_004112,B9J08_005245,	14.3	6.49	7.53	0.0367476	0.128891	1
GO:0000775	chromosome, centromeric region	59	4	B9J08_001108,B9J08_002022,B9J08_002720,B9J08_003855,	6.8	3.08	3.32	0.0400026	0.138244	1
GO:0140513	nuclear protein-containing complex	572	19	B9J08_001105,B9J08_001130,B9J08_001134,B9J08_001220,B9J08_001248,B9J08_001474,B9J08_001710,B9J08_002224,B9J08_002225,B9J08_002720,B9J08_002979,B9J08_003021,B9J08_003057,B9J08_003155,B9J08_003547,B9J08_003991,B9J08_004169,B9J08_005442,B9J08_005515,	3.3	1.51	1.65	0.0415658	0.140339	1
GO:0005881	cytoplasmic microtubule	15	2	B9J08_000811,B9J08_003245,	13.3	6.06	6.95	0.0418032	0.140339	1
GO:0045298	tubulin complex	2	1	B9J08_003245,	50	22.72	44.86	0.0435373	0.142101	1
GO:0035101	FACT complex	2	1	B9J08_002224,	50	22.72	44.86	0.0435373	0.142101	1
KEGG
ID	Name	Bgd count	Result count	Result gene list	Pct of bgd	Fold enrichment	Odds ratio	P-value	Benjamini	Bonferroni
ec00230__PK__KEGG	Purine metabolism	229	9	B9J08_000102,B9J08_000200,B9J08_001062,B9J08_002819,B9J08_003238,B9J08_004147,B9J08_004153,B9J08_004739,B9J08_004918,	3.9	2.27	2.94	0.0118033	0.802625	0.802625

## Sheet: Sheet2
Sheet 2	ISA treated WT vs. untreated WT
Species	Platform:	Type of genes	Criteria	Number of genes
C. auris	Candida Genome Database	upregulated	DEG; FC>1.5	134
Biological process
GOID	GO_term	Cluster frequency	Background frequency	Corrected P-value	False discovery rate	Gene(s) annotated to the term	Directly Annotated GOID List
16126	sterol biosynthetic process	15 out of 134 genes, 11.2%	29 out of 5417 background genes, 0.5%	5.63e-15	0	B9J08_000261:B9J08_000367:B9J08_000920:B9J08_002349:B9J08_002817:ERG4:B9J08_003026:B9J08_003224:B9J08_003345:B9J08_003730:ERG3:B9J08_004587:B9J08_004943:B9J08_004982:B9J08_005340	15936:6696:9410:15914:8299:16126:8654:6879:9058:6694:43942:35690:8610:19287:7005
6694	steroid biosynthetic process	15 out of 134 genes, 11.2%	29 out of 5417 background genes, 0.5%	5.63e-15	0	B9J08_000261:B9J08_000367:B9J08_000920:B9J08_002349:B9J08_002817:ERG4:B9J08_003026:B9J08_003224:B9J08_003345:B9J08_003730:ERG3:B9J08_004587:B9J08_004943:B9J08_004982:B9J08_005340	15936:6696:9410:15914:8299:16126:8654:6879:9058:6694:43942:35690:19287:8610:7005
16129	phytosteroid biosynthetic process	14 out of 134 genes, 10.4%	26 out of 5417 background genes, 0.5%	3.29e-14	0	B9J08_000261:B9J08_000367:B9J08_000920:B9J08_002349:B9J08_002817:ERG4:B9J08_003026:B9J08_003224:B9J08_003345:B9J08_003730:ERG3:B9J08_004587:B9J08_004943:B9J08_005340	15936:6696:8299:16126:6879:9058:6694:35690:19287:8610:7005
1902653	secondary alcohol biosynthetic process	14 out of 134 genes, 10.4%	26 out of 5417 background genes, 0.5%	3.29e-14	0	B9J08_000261:B9J08_000367:B9J08_000920:B9J08_002349:B9J08_002817:ERG4:B9J08_003026:B9J08_003224:B9J08_003345:B9J08_003730:ERG3:B9J08_004587:B9J08_004943:B9J08_005340	15936:6696:8299:16126:6879:9058:6694:35690:19287:8610:7005
6696	ergosterol biosynthetic process	14 out of 134 genes, 10.4%	26 out of 5417 background genes, 0.5%	3.29e-14	0	B9J08_000261:B9J08_000367:B9J08_000920:B9J08_002349:B9J08_002817:ERG4:B9J08_003026:B9J08_003224:B9J08_003345:B9J08_003730:ERG3:B9J08_004587:B9J08_004943:B9J08_005340	15936:6696:8299:16126:6879:9058:6694:35690:19287:8610:7005
97384	cellular lipid biosynthetic process	14 out of 134 genes, 10.4%	26 out of 5417 background genes, 0.5%	3.29e-14	0	B9J08_000261:B9J08_000367:B9J08_000920:B9J08_002349:B9J08_002817:ERG4:B9J08_003026:B9J08_003224:B9J08_003345:B9J08_003730:ERG3:B9J08_004587:B9J08_004943:B9J08_005340	15936:6696:8299:16126:6879:9058:6694:35690:19287:8610:7005
16128	phytosteroid metabolic process	14 out of 134 genes, 10.4%	28 out of 5417 background genes, 0.5%	1.31e-13	0	B9J08_000261:B9J08_000367:B9J08_000920:B9J08_002349:B9J08_002817:ERG4:B9J08_003026:B9J08_003224:B9J08_003345:B9J08_003730:ERG3:B9J08_004587:B9J08_004943:B9J08_005340	15936:6696:8299:16126:6879:9058:6694:35690:19287:8610:7005
8204	ergosterol metabolic process	14 out of 134 genes, 10.4%	28 out of 5417 background genes, 0.5%	1.31e-13	0	B9J08_000261:B9J08_000367:B9J08_000920:B9J08_002349:B9J08_002817:ERG4:B9J08_003026:B9J08_003224:B9J08_003345:B9J08_003730:ERG3:B9J08_004587:B9J08_004943:B9J08_005340	15936:6696:8299:16126:6879:9058:6694:35690:19287:8610:7005
16125	sterol metabolic process	15 out of 134 genes, 11.2%	36 out of 5417 background genes, 0.7%	3.49e-13	0	B9J08_000261:B9J08_000367:B9J08_000920:B9J08_002349:B9J08_002817:ERG4:B9J08_003026:B9J08_003224:B9J08_003345:B9J08_003730:ERG3:B9J08_004587:B9J08_004943:B9J08_004982:B9J08_005340	15936:6696:9410:15914:8299:16126:8654:6879:9058:6694:43942:35690:19287:8610:7005
8202	steroid metabolic process	15 out of 134 genes, 11.2%	38 out of 5417 background genes, 0.7%	9.31e-13	0	B9J08_000261:B9J08_000367:B9J08_000920:B9J08_002349:B9J08_002817:ERG4:B9J08_003026:B9J08_003224:B9J08_003345:B9J08_003730:ERG3:B9J08_004587:B9J08_004943:B9J08_004982:B9J08_005340	15936:6696:9410:15914:8299:16126:8654:6879:9058:6694:43942:35690:19287:8610:7005
1902652	secondary alcohol metabolic process	14 out of 134 genes, 10.4%	34 out of 5417 background genes, 0.6%	4.01e-12	0	B9J08_000261:B9J08_000367:B9J08_000920:B9J08_002349:B9J08_002817:ERG4:B9J08_003026:B9J08_003224:B9J08_003345:B9J08_003730:ERG3:B9J08_004587:B9J08_004943:B9J08_005340	15936:6696:8299:16126:6879:9058:6694:35690:19287:8610:7005
8610	lipid biosynthetic process	23 out of 134 genes, 17.2%	149 out of 5417 background genes, 2.8%	2.1e-10	0	B9J08_000261:B9J08_000367:B9J08_000511:B9J08_000654:B9J08_000749:B9J08_000920:B9J08_001759:B9J08_002349:B9J08_002817:ERG4:B9J08_003026:B9J08_003224:B9J08_003345:B9J08_003730:ERG3:B9J08_003885:B9J08_004259:B9J08_004587:B9J08_004943:B9J08_004982:B9J08_005230:B9J08_005313:B9J08_005340	9410:30148:90266:9058:71763:7005:15936:6696:30497:16126:6688:8610:34599:6506:6629:15914:8299:42761:6412:8654:6979:19287:32511:6892:6675:6673:51999:30149:38:6879:6694:43942:35690:6633:46513
46165	alcohol biosynthetic process	14 out of 134 genes, 10.4%	47 out of 5417 background genes, 0.9%	7.49e-10	0	B9J08_000261:B9J08_000367:B9J08_000920:B9J08_002349:B9J08_002817:ERG4:B9J08_003026:B9J08_003224:B9J08_003345:B9J08_003730:ERG3:B9J08_004587:B9J08_004943:B9J08_005340	9058:7005:15936:6696:16126:8610:8299:19287:6879:6694:35690
1901617	organic hydroxy compound biosynthetic process	15 out of 134 genes, 11.2%	57 out of 5417 background genes, 1.1%	8.92e-10	0	B9J08_000261:B9J08_000367:B9J08_000920:B9J08_002349:B9J08_002817:ERG4:B9J08_003026:B9J08_003224:B9J08_003345:B9J08_003730:ERG3:B9J08_004587:B9J08_004943:B9J08_004982:B9J08_005340	9410:9058:7005:15936:6696:16126:8610:15914:8299:8654:19287:6879:6694:43942:35690
44255	cellular lipid metabolic process	23 out of 134 genes, 17.2%	238 out of 5417 background genes, 4.4%	3.26e-06	0	B9J08_000261:B9J08_000367:B9J08_000511:B9J08_000654:B9J08_000749:B9J08_000920:B9J08_001759:B9J08_002349:B9J08_002817:ERG4:B9J08_003026:B9J08_003224:B9J08_003345:B9J08_003730:ERG3:B9J08_003885:B9J08_004048:B9J08_004259:B9J08_004587:B9J08_004943:B9J08_004982:B9J08_005313:B9J08_005340	9410:30148:90266:9058:2000114:71763:7005:15936:30497:6696:46488:16126:17157:43001:6688:8610:6506:34599:6629:15914:8299:42761:8654:6979:19287:32511:6892:6675:51999:6673:30149:38:6879:6694:43942:35690:6633:46513
6066	alcohol metabolic process	14 out of 134 genes, 10.4%	87 out of 5417 background genes, 1.6%	5.11e-06	0	B9J08_000261:B9J08_000367:B9J08_000920:B9J08_002349:B9J08_002817:ERG4:B9J08_003026:B9J08_003224:B9J08_003345:B9J08_003730:ERG3:B9J08_004587:B9J08_004943:B9J08_005340	9058:7005:15936:6696:16126:8610:8299:19287:6879:6694:35690
6629	lipid metabolic process	24 out of 134 genes, 17.9%	265 out of 5417 background genes, 4.9%	5.45e-06	0	B9J08_000261:B9J08_000367:B9J08_000511:B9J08_000654:B9J08_000749:B9J08_000920:B9J08_001759:B9J08_002349:B9J08_002817:ERG4:B9J08_003026:B9J08_003224:B9J08_003345:B9J08_003730:ERG3:B9J08_003885:B9J08_004048:B9J08_004259:B9J08_004587:B9J08_004943:B9J08_004982:B9J08_005230:B9J08_005313:B9J08_005340	9410:30148:90266:9058:2000114:71763:7005:15936:30497:6696:46488:16126:17157:43001:6688:8610:6506:34599:6629:15914:8299:42761:6412:8654:6979:19287:32511:6892:6675:51999:6673:30149:38:6879:6694:43942:35690:6633:46513
1901615	organic hydroxy compound metabolic process	15 out of 134 genes, 11.2%	108 out of 5417 background genes, 2.0%	1.21e-05	0	B9J08_000261:B9J08_000367:B9J08_000920:B9J08_002349:B9J08_002817:ERG4:B9J08_003026:B9J08_003224:B9J08_003345:B9J08_003730:ERG3:B9J08_004587:B9J08_004943:B9J08_004982:B9J08_005340	9410:9058:7005:15936:6696:16126:8610:15914:8299:8654:19287:6879:6694:43942:35690
44283	small molecule biosynthetic process	17 out of 134 genes, 12.7%	225 out of 5417 background genes, 4.2%	0.00892	0.0011	B9J08_000261:B9J08_000367:B9J08_000511:B9J08_000920:B9J08_002349:B9J08_002817:ERG4:B9J08_003026:B9J08_003224:B9J08_003345:B9J08_003722:B9J08_003730:ERG3:B9J08_004587:B9J08_004943:B9J08_005340:B9J08_005369	19752:30148:9058:71763:7005:15936:30497:6696:16126:19878:8610:6744:8299:42761:19287:32511:6892:6879:6694:35690:6633
6665	sphingolipid metabolic process	6 out of 134 genes, 4.5%	34 out of 5417 background genes, 0.6%	0.04222	0.004	B9J08_000511:B9J08_000654:B9J08_001759:B9J08_003885:B9J08_004259:B9J08_005313	30148:90266:71763:30497:6688:8610:34599:6629:42761:6979:32511:6892:6675:51999:6673:30149:38:6633:46513
30148	sphingolipid biosynthetic process	5 out of 134 genes, 3.7%	22 out of 5417 background genes, 0.4%	0.04371	0.0038	B9J08_000511:B9J08_000654:B9J08_003885:B9J08_004259:B9J08_005313	30148:90266:71763:30497:6688:34599:42761:6979:32511:6892:6675:6673:51999:30149:6633:46513
Molecular function
GOID	GO_term	Cluster frequency	Background frequency	Corrected P-value	False discovery rate	Gene(s) annotated to the term	Directly Annotated GOID List
5506	iron ion binding	6 out of 134 genes, 4.5%	38 out of 5417 background genes, 0.7%	0.03331	0.14	B9J08_000367:B9J08_001759:B9J08_002349:B9J08_003702:ERG3:B9J08_005230	170:3735:4497:80132:248:249:5506:16702:254:20037:16705:16491
Cellular component
No significant ontology term can be found for input genes.
Species	Platform:	Type of genes	Criteria	Number of genes
C. auris	FungiDB	upregulated	DEG; FC>1.5	134
Biological process
ID	Name	Bgd count	Result count	Result gene list	Pct of bgd	Fold enrichment	Odds ratio	P-value	Benjamini	Bonferroni
GO:1902653	secondary alcohol biosynthetic process	24	14	B9J08_000261,B9J08_000367,B9J08_000920,B9J08_002349,B9J08_002817,B9J08_002852,B9J08_003026,B9J08_003224,B9J08_003345,B9J08_003730,B9J08_003737,B9J08_004587,B9J08_004943,B9J08_005340,	58.3	25.05	67.21	9.54126e-18	1.5037e-15	7.51851e-15
GO:0006696	ergosterol biosynthetic process	24	14	B9J08_000261,B9J08_000367,B9J08_000920,B9J08_002349,B9J08_002817,B9J08_002852,B9J08_003026,B9J08_003224,B9J08_003345,B9J08_003730,B9J08_003737,B9J08_004587,B9J08_004943,B9J08_005340,	58.3	25.05	67.21	9.54126e-18	1.5037e-15	7.51851e-15
GO:0044108	cellular alcohol biosynthetic process	24	14	B9J08_000261,B9J08_000367,B9J08_000920,B9J08_002349,B9J08_002817,B9J08_002852,B9J08_003026,B9J08_003224,B9J08_003345,B9J08_003730,B9J08_003737,B9J08_004587,B9J08_004943,B9J08_005340,	58.3	25.05	67.21	9.54126e-18	1.5037e-15	7.51851e-15
GO:0016129	phytosteroid biosynthetic process	24	14	B9J08_000261,B9J08_000367,B9J08_000920,B9J08_002349,B9J08_002817,B9J08_002852,B9J08_003026,B9J08_003224,B9J08_003345,B9J08_003730,B9J08_003737,B9J08_004587,B9J08_004943,B9J08_005340,	58.3	25.05	67.21	9.54126e-18	1.5037e-15	7.51851e-15
GO:0097384	cellular lipid biosynthetic process	24	14	B9J08_000261,B9J08_000367,B9J08_000920,B9J08_002349,B9J08_002817,B9J08_002852,B9J08_003026,B9J08_003224,B9J08_003345,B9J08_003730,B9J08_003737,B9J08_004587,B9J08_004943,B9J08_005340,	58.3	25.05	67.21	9.54126e-18	1.5037e-15	7.51851e-15
GO:0016128	phytosteroid metabolic process	26	14	B9J08_000261,B9J08_000367,B9J08_000920,B9J08_002349,B9J08_002817,B9J08_002852,B9J08_003026,B9J08_003224,B9J08_003345,B9J08_003730,B9J08_003737,B9J08_004587,B9J08_004943,B9J08_005340,	53.8	23.12	55.99	4.52127e-17	3.86722e-15	3.56276e-14
GO:0008204	ergosterol metabolic process	26	14	B9J08_000261,B9J08_000367,B9J08_000920,B9J08_002349,B9J08_002817,B9J08_002852,B9J08_003026,B9J08_003224,B9J08_003345,B9J08_003730,B9J08_003737,B9J08_004587,B9J08_004943,B9J08_005340,	53.8	23.12	55.99	4.52127e-17	3.86722e-15	3.56276e-14
GO:0044107	cellular alcohol metabolic process	26	14	B9J08_000261,B9J08_000367,B9J08_000920,B9J08_002349,B9J08_002817,B9J08_002852,B9J08_003026,B9J08_003224,B9J08_003345,B9J08_003730,B9J08_003737,B9J08_004587,B9J08_004943,B9J08_005340,	53.8	23.12	55.99	4.52127e-17	3.86722e-15	3.56276e-14
GO:0016126	sterol biosynthetic process	32	15	B9J08_000261,B9J08_000367,B9J08_000920,B9J08_002349,B9J08_002817,B9J08_002852,B9J08_003026,B9J08_003224,B9J08_003345,B9J08_003730,B9J08_003737,B9J08_004587,B9J08_004943,B9J08_004982,B9J08_005340,	46.9	20.13	42.75	4.90764e-17	3.86722e-15	3.86722e-14
GO:0006694	steroid biosynthetic process	32	15	B9J08_000261,B9J08_000367,B9J08_000920,B9J08_002349,B9J08_002817,B9J08_002852,B9J08_003026,B9J08_003224,B9J08_003345,B9J08_003730,B9J08_003737,B9J08_004587,B9J08_004943,B9J08_004982,B9J08_005340,	46.9	20.13	42.75	4.90764e-17	3.86722e-15	3.86722e-14
GO:1902652	secondary alcohol metabolic process	30	14	B9J08_000261,B9J08_000367,B9J08_000920,B9J08_002349,B9J08_002817,B9J08_002852,B9J08_003026,B9J08_003224,B9J08_003345,B9J08_003730,B9J08_003737,B9J08_004587,B9J08_004943,B9J08_005340,	46.7	20.04	41.95	6.30433e-16	4.51619e-14	4.96781e-13
GO:0016125	sterol metabolic process	39	15	B9J08_000261,B9J08_000367,B9J08_000920,B9J08_002349,B9J08_002817,B9J08_002852,B9J08_003026,B9J08_003224,B9J08_003345,B9J08_003730,B9J08_003737,B9J08_004587,B9J08_004943,B9J08_004982,B9J08_005340,	38.5	16.51	30.23	1.90776e-15	1.25276e-13	1.50332e-12
GO:0008202	steroid metabolic process	40	15	B9J08_000261,B9J08_000367,B9J08_000920,B9J08_002349,B9J08_002817,B9J08_002852,B9J08_003026,B9J08_003224,B9J08_003345,B9J08_003730,B9J08_003737,B9J08_004587,B9J08_004943,B9J08_004982,B9J08_005340,	37.5	16.1	29.02	2.99459e-15	1.81518e-13	2.35973e-12
GO:0046165	alcohol biosynthetic process	45	14	B9J08_000261,B9J08_000367,B9J08_000920,B9J08_002349,B9J08_002817,B9J08_002852,B9J08_003026,B9J08_003224,B9J08_003345,B9J08_003730,B9J08_003737,B9J08_004587,B9J08_004943,B9J08_005340,	31.1	13.36	21.58	5.42102e-13	3.05126e-11	4.27177e-10
GO:1901617	organic hydroxy compound biosynthetic process	62	15	B9J08_000261,B9J08_000367,B9J08_000920,B9J08_002349,B9J08_002817,B9J08_002852,B9J08_003026,B9J08_003224,B9J08_003345,B9J08_003730,B9J08_003737,B9J08_004587,B9J08_004943,B9J08_004982,B9J08_005340,	24.2	10.39	15.36	4.54512e-12	2.3877e-10	3.58156e-09
GO:0008610	lipid biosynthetic process	160	22	B9J08_000261,B9J08_000367,B9J08_000511,B9J08_000749,B9J08_000920,B9J08_001759,B9J08_002349,B9J08_002817,B9J08_002852,B9J08_003026,B9J08_003224,B9J08_003345,B9J08_003730,B9J08_003737,B9J08_003885,B9J08_004259,B9J08_004587,B9J08_004943,B9J08_004982,B9J08_005230,B9J08_005313,B9J08_005340,	13.8	5.9	8.12	6.32905e-12	3.11706e-10	4.98729e-09
GO:0006066	alcohol metabolic process	76	15	B9J08_000261,B9J08_000367,B9J08_000920,B9J08_002349,B9J08_002817,B9J08_002852,B9J08_003026,B9J08_003065,B9J08_003224,B9J08_003345,B9J08_003730,B9J08_003737,B9J08_004587,B9J08_004943,B9J08_005340,	19.7	8.47	11.8	1.06052e-10	4.91583e-09	8.35692e-08
GO:1901615	organic hydroxy compound metabolic process	103	16	B9J08_000261,B9J08_000367,B9J08_000920,B9J08_002349,B9J08_002817,B9J08_002852,B9J08_003026,B9J08_003065,B9J08_003224,B9J08_003345,B9J08_003730,B9J08_003737,B9J08_004587,B9J08_004943,B9J08_004982,B9J08_005340,	15.5	6.67	8.87	1.03487e-09	4.53042e-08	8.15476e-07
GO:0044255	cellular lipid metabolic process	253	23	B9J08_000261,B9J08_000367,B9J08_000511,B9J08_000749,B9J08_000920,B9J08_001759,B9J08_002349,B9J08_002817,B9J08_002852,B9J08_003026,B9J08_003224,B9J08_003345,B9J08_003730,B9J08_003737,B9J08_003885,B9J08_004048,B9J08_004259,B9J08_004587,B9J08_004943,B9J08_004982,B9J08_005230,B9J08_005313,B9J08_005340,	9.1	3.9	5.05	9.44257e-09	3.91618e-07	7.44075e-06
GO:0006629	lipid metabolic process	279	23	B9J08_000261,B9J08_000367,B9J08_000511,B9J08_000749,B9J08_000920,B9J08_001759,B9J08_002349,B9J08_002817,B9J08_002852,B9J08_003026,B9J08_003224,B9J08_003345,B9J08_003730,B9J08_003737,B9J08_003885,B9J08_004048,B9J08_004259,B9J08_004587,B9J08_004943,B9J08_004982,B9J08_005230,B9J08_005313,B9J08_005340,	8.2	3.54	4.51	6.09473e-08	2.40132e-06	4.80265e-05
GO:0044283	small molecule biosynthetic process	252	20	B9J08_000261,B9J08_000367,B9J08_000511,B9J08_000920,B9J08_001759,B9J08_002349,B9J08_002817,B9J08_002852,B9J08_003026,B9J08_003224,B9J08_003345,B9J08_003702,B9J08_003722,B9J08_003730,B9J08_003737,B9J08_004587,B9J08_004943,B9J08_005230,B9J08_005340,B9J08_005369,	7.9	3.41	4.2	9.47204e-07	3.55427e-05	0.000746396
GO:0006673	inositol phosphoceramide metabolic process	7	3	B9J08_001759,B9J08_003885,B9J08_005313,	42.9	18.4	32.31	0.000401888	0.0143949	0.316688
GO:0006633	fatty acid biosynthetic process	29	5	B9J08_000367,B9J08_000511,B9J08_001759,B9J08_003737,B9J08_005230,	17.2	7.4	9.11	0.000475216	0.0162813	0.37447
GO:0006665	sphingolipid metabolic process	33	5	B9J08_000511,B9J08_001759,B9J08_003885,B9J08_004259,B9J08_005313,	15.2	6.51	7.8	0.000881903	0.0289558	0.69494
GO:0030148	sphingolipid biosynthetic process	20	4	B9J08_000511,B9J08_003885,B9J08_004259,B9J08_005313,	20	8.59	10.85	0.00101162	0.0318864	0.797159
GO:0055114	obsolete oxidation-reduction process	245	14	B9J08_000261,B9J08_000367,B9J08_000844,B9J08_000920,B9J08_001759,B9J08_002349,B9J08_002499,B9J08_002737,B9J08_002852,B9J08_003026,B9J08_003224,B9J08_003702,B9J08_003737,B9J08_005230,	5.7	2.45	2.77	0.00147335	0.0446537	1
GO:0042908	xenobiotic transport	11	3	B9J08_000479,B9J08_002187,B9J08_003981,	27.3	11.71	16.14	0.00176971	0.0516494	1
GO:0046618	xenobiotic export	4	2	B9J08_000479,B9J08_003981,	50	21.47	42.7	0.00312801	0.0821623	1
GO:0006675	mannosyl-inositol phosphorylceramide metabolic process	4	2	B9J08_001759,B9J08_003885,	50	21.47	42.7	0.00312801	0.0821623	1
GO:1990961	xenobiotic detoxification by transmembrane export across the plasma membrane	4	2	B9J08_000479,B9J08_003981,	50	21.47	42.7	0.00312801	0.0821623	1
GO:0006643	membrane lipid metabolic process	64	6	B9J08_000511,B9J08_000749,B9J08_001759,B9J08_003885,B9J08_004259,B9J08_005313,	9.4	4.03	4.53	0.00348096	0.0884837	1
GO:0006687	glycosphingolipid metabolic process	5	2	B9J08_001759,B9J08_003885,	40	17.17	28.46	0.00513413	0.126428	1
GO:0046467	membrane lipid biosynthetic process	50	5	B9J08_000511,B9J08_000749,B9J08_003885,B9J08_004259,B9J08_005313,	10	4.29	4.84	0.00575455	0.137412	1
GO:0072330	monocarboxylic acid biosynthetic process	53	5	B9J08_000367,B9J08_000511,B9J08_001759,B9J08_003737,B9J08_005230,	9.4	4.05	4.53	0.00737657	0.170757	1
GO:0071432	peptide mating pheromone maturation involved in positive regulation of conjugation with cellular fusion	6	2	B9J08_001658,B9J08_001958,	33.3	14.31	21.34	0.00758439	0.170757	1
GO:0044281	small molecule metabolic process	567	22	B9J08_000261,B9J08_000367,B9J08_000511,B9J08_000920,B9J08_001759,B9J08_002349,B9J08_002737,B9J08_002817,B9J08_002852,B9J08_003026,B9J08_003065,B9J08_003224,B9J08_003345,B9J08_003702,B9J08_003722,B9J08_003730,B9J08_003737,B9J08_004587,B9J08_004943,B9J08_005230,B9J08_005340,B9J08_005369,	3.9	1.67	1.87	0.0100801	0.220643	1
GO:0006631	fatty acid metabolic process	61	5	B9J08_000367,B9J08_000511,B9J08_001759,B9J08_003737,B9J08_005230,	8.2	3.52	3.88	0.0132098	0.281332	1
GO:0140115	export across plasma membrane	8	2	B9J08_000479,B9J08_003981,	25	10.73	14.22	0.0137325	0.284768	1
GO:0007323	peptide pheromone maturation	9	2	B9J08_001658,B9J08_001958,	22.2	9.54	12.19	0.0173897	0.333691	1
GO:0080171	lytic vacuole organization	1	1	B9J08_003344,	100	42.94	inf	0.0232906	0.333691	1
GO:0046439	L-cysteine metabolic process	1	1	B9J08_003702,	100	42.94	inf	0.0232906	0.333691	1
GO:0051999	mannosyl-inositol phosphorylceramide biosynthetic process	1	1	B9J08_003885,	100	42.94	inf	0.0232906	0.333691	1
GO:0061909	autophagosome-lysosome fusion	1	1	B9J08_002165,	100	42.94	inf	0.0232906	0.333691	1
GO:0046305	alkanesulfonate biosynthetic process	1	1	B9J08_003702,	100	42.94	inf	0.0232906	0.333691	1
GO:0001919	regulation of receptor recycling	1	1	B9J08_003344,	100	42.94	inf	0.0232906	0.333691	1
GO:0042044	fluid transport	1	1	B9J08_000928,	100	42.94	inf	0.0232906	0.333691	1
GO:0042412	taurine biosynthetic process	1	1	B9J08_003702,	100	42.94	inf	0.0232906	0.333691	1
GO:0010527	positive regulation of transposition, RNA-mediated	1	1	B9J08_003950,	100	42.94	inf	0.0232906	0.333691	1
GO:0019694	alkanesulfonate metabolic process	1	1	B9J08_003702,	100	42.94	inf	0.0232906	0.333691	1
GO:0015893	drug transport	1	1	B9J08_003981,	100	42.94	inf	0.0232906	0.333691	1
GO:0007040	lysosome organization	1	1	B9J08_003344,	100	42.94	inf	0.0232906	0.333691	1
GO:0006540	glutamate decarboxylation to succinate	1	1	B9J08_002737,	100	42.94	inf	0.0232906	0.333691	1
GO:0006833	water transport	1	1	B9J08_000928,	100	42.94	inf	0.0232906	0.333691	1
GO:0042632	cholesterol homeostasis	1	1	B9J08_003344,	100	42.94	inf	0.0232906	0.333691	1
GO:0019530	taurine metabolic process	1	1	B9J08_003702,	100	42.94	inf	0.0232906	0.333691	1
GO:0006644	phospholipid metabolic process	124	7	B9J08_000749,B9J08_001759,B9J08_003224,B9J08_003885,B9J08_004048,B9J08_004982,B9J08_005313,	5.6	2.42	2.61	0.0247553	0.348342	1
GO:1901362	organic cyclic compound biosynthetic process	483	18	B9J08_000261,B9J08_000367,B9J08_000920,B9J08_001865,B9J08_002349,B9J08_002817,B9J08_002852,B9J08_003026,B9J08_003224,B9J08_003345,B9J08_003730,B9J08_003737,B9J08_004222,B9J08_004587,B9J08_004943,B9J08_004982,B9J08_005340,B9J08_005384,	3.7	1.6	1.75	0.0288403	0.398705	1
GO:0000755	cytogamy	12	2	B9J08_001658,B9J08_005405,	16.7	7.16	8.53	0.0304652	0.413907	1
GO:0006998	nuclear envelope organization	13	2	B9J08_000511,B9J08_000768,	15.4	6.61	7.75	0.0354653	0.473672	1
GO:0000316	sulfite transport	2	1	B9J08_003703,	50	21.47	42.31	0.0460436	0.533564	1
GO:2000767	positive regulation of cytoplasmic translation	2	1	B9J08_001329,	50	21.47	42.31	0.0460436	0.533564	1
GO:0010867	positive regulation of triglyceride biosynthetic process	2	1	B9J08_000768,	50	21.47	42.31	0.0460436	0.533564	1
GO:1903730	regulation of phosphatidate phosphatase activity	2	1	B9J08_000768,	50	21.47	42.31	0.0460436	0.533564	1
GO:0006688	glycosphingolipid biosynthetic process	2	1	B9J08_003885,	50	21.47	42.31	0.0460436	0.533564	1
GO:0010866	regulation of triglyceride biosynthetic process	2	1	B9J08_000768,	50	21.47	42.31	0.0460436	0.533564	1
GO:0055092	sterol homeostasis	2	1	B9J08_003344,	50	21.47	42.31	0.0460436	0.533564	1
GO:0010530	positive regulation of transposition	2	1	B9J08_003950,	50	21.47	42.31	0.0460436	0.533564	1
GO:1903740	positive regulation of phosphatidate phosphatase activity	2	1	B9J08_000768,	50	21.47	42.31	0.0460436	0.533564	1
Molecular function
ID	Name	Bgd count	Result count	Result gene list	Pct of bgd	Fold enrichment	Odds ratio	P-value	Benjamini	Bonferroni
GO:0070704	sterol desaturase activity	2	2	B9J08_002349,B9J08_003737,	100	42.94	inf	0.00053759	0.0930269	0.145687
GO:0005506	iron ion binding	47	6	B9J08_000367,B9J08_001759,B9J08_002349,B9J08_003702,B9J08_003737,B9J08_005230,	12.8	5.48	6.44	0.000686546	0.0930269	0.186054
GO:0008526	phosphatidylinositol transfer activity	4	2	B9J08_004048,B9J08_004982,	50	21.47	42.7	0.00312801	0.134293	0.84769
GO:0005199	structural constituent of cell wall	5	2	B9J08_002560,B9J08_003910,	40	17.17	28.46	0.00513413	0.134293	1
GO:0120014	phospholipid transfer activity	5	2	B9J08_004048,B9J08_004982,	40	17.17	28.46	0.00513413	0.134293	1
GO:0070001	aspartic-type peptidase activity	16	3	B9J08_001518,B9J08_001958,B9J08_003911,	18.8	8.05	9.92	0.00551768	0.134293	1
GO:0004190	aspartic-type endopeptidase activity	16	3	B9J08_001518,B9J08_001958,B9J08_003911,	18.8	8.05	9.92	0.00551768	0.134293	1
GO:0016717	oxidoreductase activity, acting on paired donors, with oxidation of a pair of donors resulting in the reduction of molecular oxygen to two molecules of water	6	2	B9J08_002349,B9J08_003737,	33.3	14.31	21.34	0.00758439	0.134293	1
GO:0008169	C-methyltransferase activity	6	2	B9J08_005340,B9J08_005369,	33.3	14.31	21.34	0.00758439	0.134293	1
GO:0016705	oxidoreductase activity, acting on paired donors, with incorporation or reduction of molecular oxygen	43	4	B9J08_000261,B9J08_000367,B9J08_002349,B9J08_003737,	9.3	3.99	4.43	0.0171058	0.134293	1
GO:0042910	xenobiotic transmembrane transporter activity	9	2	B9J08_002187,B9J08_003981,	22.2	9.54	12.19	0.0173897	0.134293	1
GO:0016491	oxidoreductase activity	360	15	B9J08_000261,B9J08_000367,B9J08_000370,B9J08_000844,B9J08_000920,B9J08_001759,B9J08_002349,B9J08_002499,B9J08_002737,B9J08_002852,B9J08_003026,B9J08_003224,B9J08_003702,B9J08_003737,B9J08_005230,	4.2	1.79	1.95	0.0187399	0.134293	1
GO:0016709	oxidoreductase activity, acting on paired donors, with incorporation or reduction of molecular oxygen, NAD(P)H as one donor, and incorporation of one atom of oxygen	10	2	B9J08_000261,B9J08_000367,	20	8.59	10.66	0.0214099	0.134293	1
GO:0004506	squalene monooxygenase activity	1	1	B9J08_000261,	100	42.94	inf	0.0232906	0.134293	1
GO:0008689	3-demethylubiquinone-9 3-O-methyltransferase activity	1	1	B9J08_005369,	100	42.94	inf	0.0232906	0.134293	1
GO:0004420	hydroxymethylglutaryl-CoA reductase (NADPH) activity	1	1	B9J08_003224,	100	42.94	inf	0.0232906	0.134293	1
GO:0017153	sodium:dicarboxylate symporter activity	1	1	B9J08_002588,	100	42.94	inf	0.0232906	0.134293	1
GO:0005372	water transmembrane transporter activity	1	1	B9J08_000928,	100	42.94	inf	0.0232906	0.134293	1
GO:0000246	delta24(24-1) sterol reductase activity	1	1	B9J08_002852,	100	42.94	inf	0.0232906	0.134293	1
GO:0003854	3-beta-hydroxy-delta5-steroid dehydrogenase activity	1	1	B9J08_000920,	100	42.94	inf	0.0232906	0.134293	1
GO:0061542	3-demethylubiquinol-n 3-O-methyltransferase activity	1	1	B9J08_005369,	100	42.94	inf	0.0232906	0.134293	1
GO:0003838	sterol 24-C-methyltransferase activity	1	1	B9J08_005340,	100	42.94	inf	0.0232906	0.134293	1
GO:0004310	farnesyl-diphosphate farnesyltransferase activity	1	1	B9J08_004587,	100	42.94	inf	0.0232906	0.134293	1
GO:0015250	water channel activity	1	1	B9J08_000928,	100	42.94	inf	0.0232906	0.134293	1
GO:0033204	ribonuclease P RNA binding	1	1	B9J08_004991,	100	42.94	inf	0.0232906	0.134293	1
GO:0080132	fatty acid alpha-hydroxylase activity	1	1	B9J08_001759,	100	42.94	inf	0.0232906	0.134293	1
GO:0045140	inositol phosphoceramide synthase activity	1	1	B9J08_005313,	100	42.94	inf	0.0232906	0.134293	1
GO:0046557	glucan endo-1,6-beta-glucosidase activity	1	1	B9J08_003251,	100	42.94	inf	0.0232906	0.134293	1
GO:0051996	squalene synthase activity	1	1	B9J08_004587,	100	42.94	inf	0.0232906	0.134293	1
GO:0050613	delta14-sterol reductase activity	1	1	B9J08_003026,	100	42.94	inf	0.0232906	0.134293	1
GO:0052714	mannosyl-inositol phosphorylceramide phospholipase activity	1	1	B9J08_004259,	100	42.94	inf	0.0232906	0.134293	1
GO:0000319	sulfite transmembrane transporter activity	1	1	B9J08_003703,	100	42.94	inf	0.0232906	0.134293	1
GO:0061543	3-demethylubiquinol-6 3-O-methyltransferase activity	1	1	B9J08_005369,	100	42.94	inf	0.0232906	0.134293	1
GO:0000249	C-22 sterol desaturase activity	1	1	B9J08_002349,	100	42.94	inf	0.0232906	0.134293	1
GO:0000252	C-3 sterol dehydrogenase (C-4 sterol decarboxylase) activity	1	1	B9J08_000920,	100	42.94	inf	0.0232906	0.134293	1
GO:0015244	fluconazole transmembrane transporter activity	1	1	B9J08_003981,	100	42.94	inf	0.0232906	0.134293	1
GO:0010420	3,4-dihydroxy-5-polyprenylbenzoic acid O-methyltransferase activity	1	1	B9J08_005369,	100	42.94	inf	0.0232906	0.134293	1
GO:0016453	C-acetyltransferase activity	1	1	B9J08_003730,	100	42.94	inf	0.0232906	0.134293	1
GO:0017172	cysteine dioxygenase activity	1	1	B9J08_003702,	100	42.94	inf	0.0232906	0.134293	1
GO:0033764	steroid dehydrogenase activity, acting on the CH-OH group of donors, NAD or NADP as acceptor	1	1	B9J08_000920,	100	42.94	inf	0.0232906	0.134293	1
GO:0052713	inositol phosphorylceramide phospholipase activity	1	1	B9J08_004259,	100	42.94	inf	0.0232906	0.134293	1
GO:0004395	hexaprenyldihydroxybenzoate methyltransferase activity	1	1	B9J08_005369,	100	42.94	inf	0.0232906	0.134293	1
GO:0003985	acetyl-CoA C-acetyltransferase activity	1	1	B9J08_003730,	100	42.94	inf	0.0232906	0.134293	1
GO:0000254	C-4 methylsterol oxidase activity	1	1	B9J08_000367,	100	42.94	inf	0.0232906	0.134293	1
GO:0000248	C-5 sterol desaturase activity	1	1	B9J08_003737,	100	42.94	inf	0.0232906	0.134293	1
GO:0000247	C-8 sterol isomerase activity	1	1	B9J08_004943,	100	42.94	inf	0.0232906	0.134293	1
GO:0052712	inositol phosphosphingolipid phospholipase activity	1	1	B9J08_004259,	100	42.94	inf	0.0232906	0.134293	1
GO:0004497	monooxygenase activity	27	3	B9J08_000261,B9J08_000367,B9J08_002349,	11.1	4.77	5.36	0.023951	0.135223	1
GO:0016628	oxidoreductase activity, acting on the CH-CH group of donors, NAD or NADP as acceptor	11	2	B9J08_002852,B9J08_003026,	18.2	7.81	9.47	0.0257743	0.139697	1
GO:0005548	phospholipid transporter activity	11	2	B9J08_004048,B9J08_004982,	18.2	7.81	9.47	0.0257743	0.139697	1
GO:0005215	transporter activity	381	15	B9J08_000170,B9J08_000175,B9J08_000479,B9J08_000928,B9J08_001899,B9J08_001984,B9J08_002187,B9J08_002588,B9J08_002659,B9J08_003703,B9J08_003908,B9J08_003981,B9J08_004048,B9J08_004898,B9J08_004982,	3.9	1.69	1.83	0.0295599	0.157073	1
GO:0120013	lipid transfer activity	13	2	B9J08_004048,B9J08_004982,	15.4	6.61	7.75	0.0354653	0.184829	1
GO:0009013	succinate-semialdehyde dehydrogenase [NAD(P)+] activity	2	1	B9J08_002737,	50	21.47	42.31	0.0460436	0.198061	1
GO:0030580	quinone cofactor methyltransferase activity	2	1	B9J08_005369,	50	21.47	42.31	0.0460436	0.198061	1
GO:0008144	obsolete drug binding	2	1	B9J08_000261,	50	21.47	42.31	0.0460436	0.198061	1
GO:0005343	organic acid:sodium symporter activity	2	1	B9J08_002588,	50	21.47	42.31	0.0460436	0.198061	1
GO:0004849	uridine kinase activity	2	1	B9J08_005086,	50	21.47	42.31	0.0460436	0.198061	1
GO:0008425	2-polyprenyl-6-methoxy-1,4-benzoquinone methyltransferase activity	2	1	B9J08_005369,	50	21.47	42.31	0.0460436	0.198061	1
GO:0004777	succinate-semialdehyde dehydrogenase (NAD+) activity	2	1	B9J08_002737,	50	21.47	42.31	0.0460436	0.198061	1
GO:0004410	homocitrate synthase activity	2	1	B9J08_003722,	50	21.47	42.31	0.0460436	0.198061	1
GO:0016229	steroid dehydrogenase activity	2	1	B9J08_000920,	50	21.47	42.31	0.0460436	0.198061	1
GO:0003988	acetyl-CoA C-acyltransferase activity	2	1	B9J08_003730,	50	21.47	42.31	0.0460436	0.198061	1
GO:0009922	fatty acid elongase activity	2	1	B9J08_000511,	50	21.47	42.31	0.0460436	0.198061	1
Cellular component
ID	Name	Bgd count	Result count	Result gene list	Pct of bgd	Fold enrichment	Odds ratio	P-value	Benjamini	Bonferroni
GO:0016020	membrane	1545	56	B9J08_000170,B9J08_000175,B9J08_000211,B9J08_000261,B9J08_000270,B9J08_000287,B9J08_000367,B9J08_000479,B9J08_000501,B9J08_000511,B9J08_000749,B9J08_000768,B9J08_000920,B9J08_000928,B9J08_001080,B9J08_001390,B9J08_001548,B9J08_001759,B9J08_001899,B9J08_001958,B9J08_001984,B9J08_002165,B9J08_002187,B9J08_002246,B9J08_002401,B9J08_002463,B9J08_002486,B9J08_002588,B9J08_002643,B9J08_002659,B9J08_002…	3.6	1.56	2.19	4.68195e-05	0.00698926	0.0103003
GO:0031224	intrinsic component of membrane	1070	43	B9J08_000170,B9J08_000175,B9J08_000211,B9J08_000261,B9J08_000479,B9J08_000501,B9J08_000511,B9J08_000749,B9J08_000768,B9J08_000928,B9J08_001080,B9J08_001390,B9J08_001548,B9J08_001759,B9J08_001899,B9J08_001958,B9J08_001984,B9J08_002187,B9J08_002246,B9J08_002401,B9J08_002463,B9J08_002486,B9J08_002588,B9J08_002659,B9J08_002817,B9J08_002852,B9J08_002968,B9J08_003026,B9J08_003224,B9J08_003703,B9J08_003…	4	1.73	2.25	6.35387e-05	0.00698926	0.0139785
GO:0016021	integral component of membrane	1053	42	B9J08_000170,B9J08_000175,B9J08_000211,B9J08_000261,B9J08_000479,B9J08_000501,B9J08_000511,B9J08_000749,B9J08_000768,B9J08_000928,B9J08_001080,B9J08_001390,B9J08_001548,B9J08_001759,B9J08_001899,B9J08_001984,B9J08_002187,B9J08_002246,B9J08_002401,B9J08_002463,B9J08_002486,B9J08_002588,B9J08_002659,B9J08_002817,B9J08_002852,B9J08_002968,B9J08_003026,B9J08_003224,B9J08_003703,B9J08_003737,B9J08_003…	4	1.71	2.21	9.85011e-05	0.00722342	0.0216703
GO:0071944	cell periphery	390	19	B9J08_000170,B9J08_000287,B9J08_000367,B9J08_000928,B9J08_001080,B9J08_001958,B9J08_002401,B9J08_002560,B9J08_002588,B9J08_003251,B9J08_003703,B9J08_003910,B9J08_003981,B9J08_004048,B9J08_004259,B9J08_004410,B9J08_004982,B9J08_005075,B9J08_005405,	4.9	2.09	2.39	0.00143213	0.0787669	0.315068
GO:0005618	cell wall	45	5	B9J08_002560,B9J08_003251,B9J08_003910,B9J08_004410,B9J08_005405,	11.1	4.77	5.45	0.00363781	0.146924	0.800319
GO:0030312	external encapsulating structure	46	5	B9J08_002560,B9J08_003251,B9J08_003910,B9J08_004410,B9J08_005405,	10.9	4.67	5.31	0.00400702	0.146924	0.881545
GO:0005783	endoplasmic reticulum	309	15	B9J08_000261,B9J08_000367,B9J08_000511,B9J08_000920,B9J08_000928,B9J08_001759,B9J08_002817,B9J08_002852,B9J08_003224,B9J08_003737,B9J08_004048,B9J08_004259,B9J08_004587,B9J08_004943,B9J08_005340,	4.9	2.08	2.32	0.00489445	0.150717	1
GO:0005886	plasma membrane	224	12	B9J08_000170,B9J08_000287,B9J08_000367,B9J08_000928,B9J08_001080,B9J08_001958,B9J08_002401,B9J08_002588,B9J08_003703,B9J08_003981,B9J08_004048,B9J08_004259,	5.4	2.3	2.54	0.00548062	0.150717	1
GO:0009277	fungal-type cell wall	38	4	B9J08_002560,B9J08_003251,B9J08_004410,B9J08_005405,	10.5	4.52	5.08	0.0111782	0.26921	1
GO:0005811	lipid droplet	39	4	B9J08_000261,B9J08_000768,B9J08_004982,B9J08_005340,	10.3	4.4	4.94	0.0122368	0.26921	1
GO:0042175	nuclear outer membrane-endoplasmic reticulum membrane network	204	10	B9J08_000367,B9J08_000768,B9J08_000920,B9J08_000928,B9J08_001759,B9J08_002817,B9J08_003224,B9J08_004048,B9J08_004587,B9J08_004943,	4.9	2.1	2.28	0.0196236	0.365995	1
GO:0070057	prospore membrane spindle pole body attachment site	1	1	B9J08_002401,	100	42.94	inf	0.0232906	0.365995	1
GO:0070056	prospore membrane leading edge	1	1	B9J08_002401,	100	42.94	inf	0.0232906	0.365995	1
GO:0071986	Ragulator complex	1	1	B9J08_003344,	100	42.94	inf	0.0232906	0.365995	1
GO:0005789	endoplasmic reticulum membrane	193	9	B9J08_000367,B9J08_000920,B9J08_000928,B9J08_001759,B9J08_002817,B9J08_003224,B9J08_004048,B9J08_004587,B9J08_004943,	4.7	2	2.15	0.034857	0.435497	1
GO:0032588	trans-Golgi network membrane	2	1	B9J08_003885,	50	21.47	42.31	0.0460436	0.435497	1
GO:0030691	Noc2p-Noc3p complex	2	1	B9J08_002348,	50	21.47	42.31	0.0460436	0.435497	1
GO:0033106	cis-Golgi network membrane	2	1	B9J08_003885,	50	21.47	42.31	0.0460436	0.435497	1
GO:0071595	Nem1-Spo7 phosphatase complex	2	1	B9J08_000768,	50	21.47	42.31	0.0460436	0.435497	1
GO:0070916	inositol phosphoceramide synthase complex	2	1	B9J08_005313,	50	21.47	42.31	0.0460436	0.435497	1
GO:0097078	FAL1-SGD1 complex	2	1	B9J08_005085,	50	21.47	42.31	0.0460436	0.435497	1
GO:0044422	obsolete organelle part	2	1	B9J08_000261,	50	21.47	42.31	0.0460436	0.435497	1
GO:1990527	Tec1p-Ste12p-Dig1p complex	2	1	B9J08_003950,	50	21.47	42.31	0.0460436	0.435497	1
GO:0012505	endomembrane system	624	21	B9J08_000261,B9J08_000367,B9J08_000511,B9J08_000768,B9J08_000920,B9J08_000928,B9J08_001759,B9J08_002401,B9J08_002817,B9J08_002852,B9J08_003224,B9J08_003344,B9J08_003737,B9J08_003885,B9J08_004048,B9J08_004050,B9J08_004259,B9J08_004587,B9J08_004943,B9J08_005313,B9J08_005340,	3.4	1.44	1.57	0.0494713	0.435497	1
GO:0098827	endoplasmic reticulum subcompartment	206	9	B9J08_000367,B9J08_000920,B9J08_000928,B9J08_001759,B9J08_002817,B9J08_003224,B9J08_004048,B9J08_004587,B9J08_004943,	4.4	1.88	2	0.0494883	0.435497	1
KEGG
ID	Name	Bgd count	Result count	Result gene list	Pct of bgd	Fold enrichment	Odds ratio	P-value	Benjamini	Bonferroni
ec00100__PK__KEGG	Steroid biosynthesis	24	9	B9J08_000261,B9J08_000367,B9J08_000920,B9J08_002349,B9J08_002852,B9J08_003026,B9J08_003737,B9J08_004587,B9J08_005340,	37.5	15.52	31.2	1.0718e-09	1.22185e-07	1.22185e-07
ec00909__PK__KEGG	Sesquiterpenoid and triterpenoid biosynthesis	5	2	B9J08_000261,B9J08_004587,	40	16.55	28.32	0.00543563	0.282686	0.619661
ec00943__PK__KEGG	Isoflavonoid biosynthesis	6	2	B9J08_002349,B9J08_003737,	33.3	13.79	21.23	0.00802924	0.282686	0.915333
ec00780__PK__KEGG	Biotin metabolism	38	4	B9J08_000370,B9J08_001759,B9J08_002463,B9J08_004899,	10.5	4.36	5.18	0.0119014	0.282686	1
ec00522__PK__KEGG	Biosynthesis of 12-, 14- and 16-membered macrolides	44	4	B9J08_002349,B9J08_003737,B9J08_003885,B9J08_004447,	9.1	3.76	4.39	0.0197237	0.282686	1
ec00905__PK__KEGG	Brassinosteroid biosynthesis	10	2	B9J08_002349,B9J08_003737,	20	8.28	10.59	0.0226585	0.282686	1
ec00981__PK__KEGG	Insect hormone biosynthesis	46	4	B9J08_000367,B9J08_000768,B9J08_001759,B9J08_002737,	8.7	3.6	4.17	0.0229023	0.282686	1
ec00998__PK__KEGG	Biosynthesis of various antibiotics	70	5	B9J08_000768,B9J08_001759,B9J08_002349,B9J08_003065,B9J08_003737,	7.1	2.96	3.42	0.0242478	0.282686	1
ec00903__PK__KEGG	Limonene and pinene degradation	72	5	B9J08_002349,B9J08_002499,B9J08_002737,B9J08_003065,B9J08_003737,	6.9	2.87	3.31	0.027058	0.282686	1
ec00906__PK__KEGG	Carotenoid biosynthesis	74	5	B9J08_002349,B9J08_003065,B9J08_003737,B9J08_003885,B9J08_004447,	6.8	2.8	3.21	0.0300711	0.282686	1
ec00900__PK__KEGG	Terpenoid backbone biosynthesis	50	4	B9J08_002560,B9J08_003224,B9J08_003730,B9J08_004587,	8	3.31	3.8	0.0301607	0.282686	1
ec00941__PK__KEGG	Flavonoid biosynthesis	51	4	B9J08_002349,B9J08_003737,B9J08_003885,B9J08_004447,	7.8	3.25	3.72	0.0321669	0.282686	1
ec00901__PK__KEGG	Indole alkaloid biosynthesis	12	2	B9J08_002349,B9J08_003737,	16.7	6.9	8.46	0.0322361	0.282686	1
ec00600__PK__KEGG	Sphingolipid metabolism	77	5	B9J08_000509,B9J08_003885,B9J08_004259,B9J08_004447,B9J08_004898,	6.5	2.69	3.07	0.0349804	0.28484	1
Species	Platform:	Type of genes	Criteria	Number of genes
C. auris	Candida Genome Database	downregulated	DEG; FC<-1.5	96
Biological process
GOID	GO_term	Cluster frequency	Background frequency	Corrected P-value	False discovery rate	Gene(s) annotated to the term	Directly Annotated GOID List
6412	translation	17 out of 96 genes, 17.7%	255 out of 5417 background genes, 4.7%	0.00051	0	B9J08_000217:B9J08_000425:B9J08_000553:B9J08_000638:B9J08_000698:B9J08_001095:B9J08_001128:B9J08_001822:B9J08_002786:B9J08_002947:B9J08_003274:B9J08_003560:B9J08_003596:B9J08_004006:B9J08_004147:B9J08_005005:B9J08_005586	6415:6436:70183:32543:70124:7131:6418:6412:33617:6414
1901566	organonitrogen compound biosynthetic process	26 out of 96 genes, 27.1%	656 out of 5417 background genes, 12.1%	0.01329	0.01	B9J08_000058:B9J08_000217:B9J08_000425:B9J08_000553:B9J08_000638:B9J08_000698:B9J08_001095:B9J08_001128:B9J08_001205:B9J08_001822:B9J08_001884:B9J08_002519:B9J08_002531:B9J08_002786:B9J08_002947:B9J08_003099:B9J08_003274:B9J08_003440:B9J08_003560:B9J08_003596:B9J08_004006:B9J08_004147:B9J08_004450:B9J08_004601:B9J08_005005:B9J08_005586	46704:6436:70183:8615:52837:70124:7131:6235:2:19265:6240:6412:6260:42819:6535:6414:9263:6415:9228:42823:32543:9102:6418:19354:103:9082:33617
34309	primary alcohol biosynthetic process	3 out of 96 genes, 3.1%	5 out of 5417 background genes, 0.1%	0.01535	0.0133	B9J08_001205:B9J08_003099:B9J08_004450	52837:2:9228
9228	thiamine biosynthetic process	3 out of 96 genes, 3.1%	5 out of 5417 background genes, 0.1%	0.01535	0.01	B9J08_001205:B9J08_003099:B9J08_004450	52837:2:9228
42723	thiamine-containing compound metabolic process	3 out of 96 genes, 3.1%	6 out of 5417 background genes, 0.1%	0.03031	0.008	B9J08_001205:B9J08_003099:B9J08_004450	52837:2:9228
42724	thiamine-containing compound biosynthetic process	3 out of 96 genes, 3.1%	6 out of 5417 background genes, 0.1%	0.03031	0.0067	B9J08_001205:B9J08_003099:B9J08_004450	52837:2:9228
6772	thiamine metabolic process	3 out of 96 genes, 3.1%	6 out of 5417 background genes, 0.1%	0.03031	0.0057	B9J08_001205:B9J08_003099:B9J08_004450	52837:2:9228
32543	mitochondrial translation	6 out of 96 genes, 6.2%	47 out of 5417 background genes, 0.9%	0.04618	0.01	B9J08_000425:B9J08_000638:B9J08_001095:B9J08_002947:B9J08_004006:B9J08_004147	6436:70183:70124:7131:6412:6414:32543:6418
Molecular function
GOID	GO_term	Cluster frequency	Background frequency	Corrected P-value	False discovery rate	Gene(s) annotated to the term	Directly Annotated GOID List
3735	structural constituent of ribosome	21 out of 96 genes, 21.9%	149 out of 5417 background genes, 2.8%	5.74e-12	0	B9J08_000217:B9J08_000553:B9J08_000638:B9J08_000698:B9J08_001128:B9J08_001607:B9J08_001744:B9J08_001822:B9J08_002317:B9J08_002786:B9J08_002947:B9J08_003274:B9J08_003560:B9J08_003596:B9J08_003930:B9J08_004006:B9J08_004269:B9J08_004396:B9J08_005005:B9J08_005012:B9J08_005362	3725:3735:19843:46872:3723:4525:16740:4784
5198	structural molecule activity	21 out of 96 genes, 21.9%	223 out of 5417 background genes, 4.1%	1.64e-08	0	B9J08_000217:B9J08_000553:B9J08_000638:B9J08_000698:B9J08_001128:B9J08_001607:B9J08_001744:B9J08_001822:B9J08_002317:B9J08_002786:B9J08_002947:B9J08_003274:B9J08_003560:B9J08_003596:B9J08_003930:B9J08_004006:B9J08_004269:B9J08_004396:B9J08_005005:B9J08_005012:B9J08_005362	3725:3735:19843:46872:3723:16740:4525:4784
16209	antioxidant activity	4 out of 96 genes, 4.2%	21 out of 5417 background genes, 0.4%	0.04531	0.0467	B9J08_000645:B9J08_001744:B9J08_003819:B9J08_004396	50660:3735:43022:4601:16209:46872:50661:4784:16491:140824:51082:8379:16668:19207:4362:51920
Cellular component
GOID	GO_term	Cluster frequency	Background frequency	Corrected P-value	False discovery rate	Gene(s) annotated to the term	Directly Annotated GOID List
313	organellar ribosome	21 out of 96 genes, 21.9%	78 out of 5417 background genes, 1.4%	3.05e-18	0	B9J08_000217:B9J08_000553:B9J08_000638:B9J08_000698:B9J08_001128:B9J08_001607:B9J08_001744:B9J08_001822:B9J08_002317:B9J08_002786:B9J08_002947:B9J08_003274:B9J08_003560:B9J08_003596:B9J08_003930:B9J08_004006:B9J08_004269:B9J08_004396:B9J08_005005:B9J08_005012:B9J08_005362	15934:5763:15935:5840:5762:5739:42645
5761	mitochondrial ribosome	21 out of 96 genes, 21.9%	78 out of 5417 background genes, 1.4%	3.05e-18	0	B9J08_000217:B9J08_000553:B9J08_000638:B9J08_000698:B9J08_001128:B9J08_001607:B9J08_001744:B9J08_001822:B9J08_002317:B9J08_002786:B9J08_002947:B9J08_003274:B9J08_003560:B9J08_003596:B9J08_003930:B9J08_004006:B9J08_004269:B9J08_004396:B9J08_005005:B9J08_005012:B9J08_005362	15934:5763:15935:5840:5762:5739:42645
5759	mitochondrial matrix	27 out of 96 genes, 28.1%	165 out of 5417 background genes, 3.0%	8.98e-18	0	B9J08_000217:B9J08_000425:B9J08_000553:B9J08_000638:B9J08_000698:RAD51:B9J08_001128:B9J08_001607:B9J08_001744:B9J08_001822:B9J08_002317:B9J08_002786:B9J08_002947:B9J08_003274:B9J08_003440:B9J08_003560:B9J08_003596:B9J08_003930:HSP60:B9J08_004006:B9J08_004269:B9J08_004396:B9J08_004591:B9J08_005005:B9J08_005012:B9J08_005023:B9J08_005362	1405:15934:5763:71014:5758:775:228:5840:5739:42645:794:35861:15935:5762:5759
98798	mitochondrial protein-containing complex	23 out of 96 genes, 24.0%	158 out of 5417 background genes, 2.9%	1.02e-13	0	B9J08_000217:B9J08_000553:B9J08_000638:B9J08_000698:B9J08_001128:B9J08_001607:B9J08_001744:B9J08_001822:B9J08_002097:B9J08_002317:B9J08_002786:B9J08_002947:B9J08_003274:B9J08_003560:B9J08_003596:B9J08_003930:B9J08_004006:B9J08_004269:B9J08_004396:B9J08_005005:B9J08_005012:B9J08_005023:B9J08_005362	1405:15934:5763:5840:5739:42645:19867:1401:15935:5762:5741
5739	mitochondrion	39 out of 96 genes, 40.6%	562 out of 5417 background genes, 10.4%	3.72e-13	0	B9J08_000034:B9J08_000217:B9J08_000344:B9J08_000419:B9J08_000425:B9J08_000553:B9J08_000638:B9J08_000698:B9J08_001095:RAD51:B9J08_001128:B9J08_001281:B9J08_001607:B9J08_001744:B9J08_001822:B9J08_002097:B9J08_002317:B9J08_002786:B9J08_002947:B9J08_003274:B9J08_003440:B9J08_003560:B9J08_003596:B9J08_003819:B9J08_003905:B9J08_003930:HSP60:B9J08_004006:B9J08_004147:B9J08_004269:B9J08_004380:B9J08_0043…	1405:30061:5763:5829:5758:97002:5840:5777:5739:42645:794:19867:5762:5759:15934:5743:71014:228:775:16020:5634:35861:15935:1401:5741
44391	ribosomal subunit	21 out of 96 genes, 21.9%	144 out of 5417 background genes, 2.7%	2.04e-12	0	B9J08_000217:B9J08_000553:B9J08_000638:B9J08_000698:B9J08_001128:B9J08_001607:B9J08_001744:B9J08_001822:B9J08_002317:B9J08_002786:B9J08_002947:B9J08_003274:B9J08_003560:B9J08_003596:B9J08_003930:B9J08_004006:B9J08_004269:B9J08_004396:B9J08_005005:B9J08_005012:B9J08_005362	5763:5840:5739:42645:5762:15934:15935
5840	ribosome	21 out of 96 genes, 21.9%	182 out of 5417 background genes, 3.4%	2.32e-10	0	B9J08_000217:B9J08_000553:B9J08_000638:B9J08_000698:B9J08_001128:B9J08_001607:B9J08_001744:B9J08_001822:B9J08_002317:B9J08_002786:B9J08_002947:B9J08_003274:B9J08_003560:B9J08_003596:B9J08_003930:B9J08_004006:B9J08_004269:B9J08_004396:B9J08_005005:B9J08_005012:B9J08_005362	5763:5840:5739:42645:5762:15934:15935
315	organellar large ribosomal subunit	12 out of 96 genes, 12.5%	44 out of 5417 background genes, 0.8%	4.66e-10	0	B9J08_000217:B9J08_000698:B9J08_001128:B9J08_001607:B9J08_002317:B9J08_002786:B9J08_003274:B9J08_003596:B9J08_003930:B9J08_004006:B9J08_004269:B9J08_005005	5840:5739:42645:5762:15934
5762	mitochondrial large ribosomal subunit	12 out of 96 genes, 12.5%	44 out of 5417 background genes, 0.8%	4.66e-10	0	B9J08_000217:B9J08_000698:B9J08_001128:B9J08_001607:B9J08_002317:B9J08_002786:B9J08_003274:B9J08_003596:B9J08_003930:B9J08_004006:B9J08_004269:B9J08_005005	5840:5739:42645:5762:15934
314	organellar small ribosomal subunit	9 out of 96 genes, 9.4%	30 out of 5417 background genes, 0.6%	9.19e-08	0	B9J08_000553:B9J08_000638:B9J08_001744:B9J08_001822:B9J08_002947:B9J08_003560:B9J08_004396:B9J08_005012:B9J08_005362	5763:5840:15935
5763	mitochondrial small ribosomal subunit	9 out of 96 genes, 9.4%	30 out of 5417 background genes, 0.6%	9.19e-08	0	B9J08_000553:B9J08_000638:B9J08_001744:B9J08_001822:B9J08_002947:B9J08_003560:B9J08_004396:B9J08_005012:B9J08_005362	5763:5840:15935
15934	large ribosomal subunit	12 out of 96 genes, 12.5%	89 out of 5417 background genes, 1.6%	2.72e-06	0	B9J08_000217:B9J08_000698:B9J08_001128:B9J08_001607:B9J08_002317:B9J08_002786:B9J08_003274:B9J08_003596:B9J08_003930:B9J08_004006:B9J08_004269:B9J08_005005	5840:5739:42645:5762:15934
31974	membrane-enclosed lumen	32 out of 96 genes, 33.3%	726 out of 5417 background genes, 13.4%	2.73e-05	0	B9J08_000217:B9J08_000344:B9J08_000425:B9J08_000553:B9J08_000638:B9J08_000698:RAD51:B9J08_001128:MRC1:B9J08_001607:B9J08_001744:B9J08_001822:B9J08_002317:B9J08_002379:B9J08_002786:B9J08_002819:B9J08_002947:B9J08_003274:B9J08_003440:B9J08_003560:B9J08_003596:B9J08_003930:HSP60:B9J08_004006:B9J08_004269:B9J08_004396:B9J08_004591:B9J08_005005:B9J08_005012:B9J08_005023:B9J08_005362:B9J08_005515	140453:1405:31298:5763:99020:5758:99021:5840:5658:31965:5783:5739:42645:794:140445:785:5762:5759:5788:15934:71014:5657:775:228:5634:34099:35861:15935:34399:43596
43233	organelle lumen	32 out of 96 genes, 33.3%	726 out of 5417 background genes, 13.4%	2.73e-05	0	B9J08_000217:B9J08_000344:B9J08_000425:B9J08_000553:B9J08_000638:B9J08_000698:RAD51:B9J08_001128:MRC1:B9J08_001607:B9J08_001744:B9J08_001822:B9J08_002317:B9J08_002379:B9J08_002786:B9J08_002819:B9J08_002947:B9J08_003274:B9J08_003440:B9J08_003560:B9J08_003596:B9J08_003930:HSP60:B9J08_004006:B9J08_004269:B9J08_004396:B9J08_004591:B9J08_005005:B9J08_005012:B9J08_005023:B9J08_005362:B9J08_005515	140453:1405:31298:5763:99020:5758:99021:5840:5658:31965:5783:5739:42645:794:140445:785:5762:5759:5788:15934:71014:5657:775:228:5634:34099:35861:15935:34399:43596
70013	intracellular organelle lumen	32 out of 96 genes, 33.3%	726 out of 5417 background genes, 13.4%	2.73e-05	0	B9J08_000217:B9J08_000344:B9J08_000425:B9J08_000553:B9J08_000638:B9J08_000698:RAD51:B9J08_001128:MRC1:B9J08_001607:B9J08_001744:B9J08_001822:B9J08_002317:B9J08_002379:B9J08_002786:B9J08_002819:B9J08_002947:B9J08_003274:B9J08_003440:B9J08_003560:B9J08_003596:B9J08_003930:HSP60:B9J08_004006:B9J08_004269:B9J08_004396:B9J08_004591:B9J08_005005:B9J08_005012:B9J08_005023:B9J08_005362:B9J08_005515	140453:1405:31298:5763:99020:5758:99021:5840:5658:31965:5783:5739:42645:794:140445:785:5762:5759:5788:15934:71014:5657:775:228:5634:34099:35861:15935:34399:43596
15935	small ribosomal subunit	9 out of 96 genes, 9.4%	55 out of 5417 background genes, 1.0%	2.83e-05	0	B9J08_000553:B9J08_000638:B9J08_001744:B9J08_001822:B9J08_002947:B9J08_003560:B9J08_004396:B9J08_005012:B9J08_005362	5763:5840:15935
1990904	ribonucleoprotein complex	22 out of 96 genes, 22.9%	387 out of 5417 background genes, 7.1%	4.83e-05	0	B9J08_000217:B9J08_000553:B9J08_000638:B9J08_000698:B9J08_001128:B9J08_001607:B9J08_001744:B9J08_001822:B9J08_002317:B9J08_002786:B9J08_002947:B9J08_003274:B9J08_003560:B9J08_003596:B9J08_003930:HSP60:B9J08_004006:B9J08_004269:B9J08_004396:B9J08_005005:B9J08_005012:B9J08_005362	5763:5758:5840:5739:42645:5762:5759:15934:71014:15935
42645	mitochondrial nucleoid	4 out of 96 genes, 4.2%	22 out of 5417 background genes, 0.4%	0.03925	0.0089	B9J08_002786:B9J08_003440:HSP60:B9J08_004591	5758:5840:5739:42645:5762:5759:71014
9295	nucleoid	4 out of 96 genes, 4.2%	22 out of 5417 background genes, 0.4%	0.03925	0.0084	B9J08_002786:B9J08_003440:HSP60:B9J08_004591	5758:5840:5739:42645:5762:5759:71014
Species	Platform:	Type of genes	Criteria	Number of genes
C. auris	FungiDB	downregulated	DEG; FC<-1.5	96
Biological process
ID	Name	Bgd count	Result count	Result gene list	Pct of bgd	Fold enrichment	Odds ratio	P-value	Benjamini	Bonferroni
GO:0006518	peptide metabolic process	276	18	B9J08_000217,B9J08_000553,B9J08_000638,B9J08_000698,B9J08_001095,B9J08_001128,B9J08_001822,B9J08_002786,B9J08_002947,B9J08_003274,B9J08_003560,B9J08_003596,B9J08_003819,B9J08_004006,B9J08_004147,B9J08_005005,B9J08_005362,B9J08_005586,	6.5	3.72	4.73	8.11287e-07	0.000250873	0.00063686
GO:0043603	cellular amide metabolic process	338	20	B9J08_000217,B9J08_000553,B9J08_000638,B9J08_000698,B9J08_001095,B9J08_001128,B9J08_001822,B9J08_001884,B9J08_002786,B9J08_002947,B9J08_003274,B9J08_003452,B9J08_003560,B9J08_003596,B9J08_003819,B9J08_004006,B9J08_004147,B9J08_005005,B9J08_005362,B9J08_005586,	5.9	3.38	4.34	8.40226e-07	0.000250873	0.000659577
GO:0006412	translation	251	17	B9J08_000217,B9J08_000553,B9J08_000638,B9J08_000698,B9J08_001095,B9J08_001128,B9J08_001822,B9J08_002786,B9J08_002947,B9J08_003274,B9J08_003560,B9J08_003596,B9J08_004006,B9J08_004147,B9J08_005005,B9J08_005362,B9J08_005586,	6.8	3.87	4.88	1.02314e-06	0.000250873	0.000803166
GO:0043043	peptide biosynthetic process	255	17	B9J08_000217,B9J08_000553,B9J08_000638,B9J08_000698,B9J08_001095,B9J08_001128,B9J08_001822,B9J08_002786,B9J08_002947,B9J08_003274,B9J08_003560,B9J08_003596,B9J08_004006,B9J08_004147,B9J08_005005,B9J08_005362,B9J08_005586,	6.7	3.8	4.79	1.27833e-06	0.000250873	0.00100349
GO:0043604	amide biosynthetic process	291	18	B9J08_000217,B9J08_000553,B9J08_000638,B9J08_000698,B9J08_001095,B9J08_001128,B9J08_001822,B9J08_001884,B9J08_002786,B9J08_002947,B9J08_003274,B9J08_003560,B9J08_003596,B9J08_004006,B9J08_004147,B9J08_005005,B9J08_005362,B9J08_005586,	6.2	3.53	4.46	1.76529e-06	0.00027715	0.00138575
GO:1901566	organonitrogen compound biosynthetic process	672	26	B9J08_000058,B9J08_000217,B9J08_000553,B9J08_000638,B9J08_000698,B9J08_001095,B9J08_001128,B9J08_001205,B9J08_001822,B9J08_001884,B9J08_002519,B9J08_002531,B9J08_002786,B9J08_002947,B9J08_003099,B9J08_003274,B9J08_003440,B9J08_003560,B9J08_003596,B9J08_004006,B9J08_004147,B9J08_004450,B9J08_004601,B9J08_005005,B9J08_005362,B9J08_005586,	3.9	2.21	2.84	4.3521e-05	0.00567063	0.034164
GO:0009228	thiamine biosynthetic process	5	3	B9J08_001205,B9J08_003099,B9J08_004450,	60	34.24	87.27	5.05661e-05	0.00567063	0.0396944
GO:0055114	obsolete oxidation-reduction process	245	14	B9J08_000144,B9J08_000344,B9J08_000419,B9J08_000645,B9J08_001281,B9J08_001364,B9J08_001365,B9J08_001744,B9J08_002531,B9J08_003440,B9J08_003819,B9J08_004396,B9J08_004583,B9J08_004601,	5.7	3.26	3.89	7.1843e-05	0.00653204	0.0563968
GO:0034309	primary alcohol biosynthetic process	6	3	B9J08_001205,B9J08_003099,B9J08_004450,	50	28.54	58.16	9.98528e-05	0.00653204	0.0783845
GO:0042723	thiamine-containing compound metabolic process	6	3	B9J08_001205,B9J08_003099,B9J08_004450,	50	28.54	58.16	9.98528e-05	0.00653204	0.0783845
GO:0042724	thiamine-containing compound biosynthetic process	6	3	B9J08_001205,B9J08_003099,B9J08_004450,	50	28.54	58.16	9.98528e-05	0.00653204	0.0783845
GO:0006772	thiamine metabolic process	6	3	B9J08_001205,B9J08_003099,B9J08_004450,	50	28.54	58.16	9.98528e-05	0.00653204	0.0783845
GO:0044271	cellular nitrogen compound biosynthetic process	694	25	B9J08_000058,B9J08_000217,B9J08_000553,B9J08_000638,B9J08_000698,B9J08_001095,B9J08_001128,B9J08_001205,B9J08_001822,B9J08_001884,B9J08_002531,B9J08_002786,B9J08_002947,B9J08_003099,B9J08_003274,B9J08_003560,B9J08_003596,B9J08_004006,B9J08_004147,B9J08_004450,B9J08_004601,B9J08_005005,B9J08_005362,B9J08_005515,B9J08_005586,	3.6	2.06	2.58	0.000210738	0.0127253	0.165429
GO:0009110	vitamin biosynthetic process	36	5	B9J08_000058,B9J08_001205,B9J08_001884,B9J08_003099,B9J08_004450,	13.9	7.93	9.57	0.000359515	0.0188146	0.282219
GO:0042364	water-soluble vitamin biosynthetic process	36	5	B9J08_000058,B9J08_001205,B9J08_001884,B9J08_003099,B9J08_004450,	13.9	7.93	9.57	0.000359515	0.0188146	0.282219
GO:0006766	vitamin metabolic process	37	5	B9J08_000058,B9J08_001205,B9J08_001884,B9J08_003099,B9J08_004450,	13.5	7.71	9.27	0.000410025	0.0189335	0.32187
GO:0006767	water-soluble vitamin metabolic process	37	5	B9J08_000058,B9J08_001205,B9J08_001884,B9J08_003099,B9J08_004450,	13.5	7.71	9.27	0.000410025	0.0189335	0.32187
GO:0072528	pyrimidine-containing compound biosynthetic process	22	4	B9J08_001205,B9J08_003099,B9J08_004450,B9J08_004601,	18.2	10.38	13.05	0.000503661	0.0219652	0.395374
GO:0034308	primary alcohol metabolic process	11	3	B9J08_001205,B9J08_003099,B9J08_004450,	27.3	15.57	21.79	0.000773083	0.0319405	0.60687
GO:0009229	thiamine diphosphate biosynthetic process	3	2	B9J08_001205,B9J08_004450,	66.7	38.05	114.92	0.000899583	0.0331167	0.706173
GO:0042357	thiamine diphosphate metabolic process	3	2	B9J08_001205,B9J08_004450,	66.7	38.05	114.92	0.000899583	0.0331167	0.706173
GO:0032543	mitochondrial translation	44	5	B9J08_000638,B9J08_001095,B9J08_002947,B9J08_004006,B9J08_004147,	11.4	6.49	7.59	0.00092811	0.0331167	0.728567
GO:0072527	pyrimidine-containing compound metabolic process	26	4	B9J08_001205,B9J08_003099,B9J08_004450,B9J08_004601,	15.4	8.78	10.67	0.000975917	0.0333085	0.766095
GO:0006626	protein targeting to mitochondrion	45	5	B9J08_000344,B9J08_002097,B9J08_003991,B9J08_004728,B9J08_005023,	11.1	6.34	7.4	0.00102993	0.0336873	0.808494
GO:1901576	organic substance biosynthetic process	1172	33	B9J08_000058,B9J08_000217,B9J08_000553,B9J08_000638,B9J08_000698,B9J08_000997,B9J08_001095,B9J08_001108,B9J08_001128,B9J08_001205,B9J08_001281,B9J08_001364,B9J08_001469,B9J08_001822,B9J08_001884,B9J08_002519,B9J08_002531,B9J08_002786,B9J08_002819,B9J08_002947,B9J08_003099,B9J08_003274,B9J08_003440,B9J08_003560,B9J08_003596,B9J08_004006,B9J08_004147,B9J08_004450,B9J08_004601,B9J08_005005,B9J08_005…	2.8	1.61	2.05	0.00161323	0.0506555	1
GO:0072655	establishment of protein localization to mitochondrion	52	5	B9J08_000344,B9J08_002097,B9J08_003991,B9J08_004728,B9J08_005023,	9.6	5.49	6.29	0.00199092	0.0578841	1
GO:0070585	protein localization to mitochondrion	52	5	B9J08_000344,B9J08_002097,B9J08_003991,B9J08_004728,B9J08_005023,	9.6	5.49	6.29	0.00199092	0.0578841	1
GO:0044249	cellular biosynthetic process	1145	32	B9J08_000058,B9J08_000217,B9J08_000553,B9J08_000638,B9J08_000698,B9J08_000997,B9J08_001095,B9J08_001108,B9J08_001128,B9J08_001205,B9J08_001281,B9J08_001469,B9J08_001822,B9J08_001884,B9J08_002519,B9J08_002531,B9J08_002786,B9J08_002819,B9J08_002947,B9J08_003099,B9J08_003274,B9J08_003440,B9J08_003560,B9J08_003596,B9J08_004006,B9J08_004147,B9J08_004450,B9J08_004601,B9J08_005005,B9J08_005362,B9J08_005…	2.8	1.6	2	0.00226621	0.0608733	1
GO:0009058	biosynthetic process	1196	33	B9J08_000058,B9J08_000217,B9J08_000553,B9J08_000638,B9J08_000698,B9J08_000997,B9J08_001095,B9J08_001108,B9J08_001128,B9J08_001205,B9J08_001281,B9J08_001364,B9J08_001469,B9J08_001822,B9J08_001884,B9J08_002519,B9J08_002531,B9J08_002786,B9J08_002819,B9J08_002947,B9J08_003099,B9J08_003274,B9J08_003440,B9J08_003560,B9J08_003596,B9J08_004006,B9J08_004147,B9J08_004450,B9J08_004601,B9J08_005005,B9J08_005…	2.8	1.57	1.99	0.00231669	0.0608733	1
GO:0034645	cellular macromolecule biosynthetic process	722	23	B9J08_000217,B9J08_000553,B9J08_000638,B9J08_000698,B9J08_000997,B9J08_001095,B9J08_001108,B9J08_001128,B9J08_001469,B9J08_001822,B9J08_002786,B9J08_002819,B9J08_002947,B9J08_003274,B9J08_003560,B9J08_003596,B9J08_004006,B9J08_004147,B9J08_004601,B9J08_005005,B9J08_005362,B9J08_005515,B9J08_005586,	3.2	1.82	2.17	0.00232637	0.0608733	1
GO:0072593	reactive oxygen species metabolic process	16	3	B9J08_000645,B9J08_001744,B9J08_004396,	18.8	10.7	13.39	0.00246286	0.062366	1
GO:0006457	protein folding	81	6	B9J08_000645,B9J08_000960,B9J08_001365,B9J08_002379,B9J08_003991,B9J08_004206,	7.4	4.23	4.76	0.00274095	0.0672389	1
GO:0006839	mitochondrial transport	57	5	B9J08_000344,B9J08_002097,B9J08_003991,B9J08_004728,B9J08_005023,	8.8	5.01	5.68	0.0029959	0.0712662	1
GO:0009059	macromolecule biosynthetic process	739	23	B9J08_000217,B9J08_000553,B9J08_000638,B9J08_000698,B9J08_000997,B9J08_001095,B9J08_001108,B9J08_001128,B9J08_001469,B9J08_001822,B9J08_002786,B9J08_002819,B9J08_002947,B9J08_003274,B9J08_003560,B9J08_003596,B9J08_004006,B9J08_004147,B9J08_004601,B9J08_005005,B9J08_005362,B9J08_005515,B9J08_005586,	3.1	1.78	2.11	0.0031648	0.0730697	1
GO:0140053	mitochondrial gene expression	59	5	B9J08_000638,B9J08_001095,B9J08_002947,B9J08_004006,B9J08_004147,	8.5	4.84	5.46	0.00348574	0.0781801	1
GO:0000002	mitochondrial genome maintenance	37	4	B9J08_001108,B9J08_003099,B9J08_003440,B9J08_004591,	10.8	6.17	7.09	0.00372523	0.0812308	1
GO:0006790	sulfur compound metabolic process	116	7	B9J08_000058,B9J08_001205,B9J08_001884,B9J08_002531,B9J08_003099,B9J08_003819,B9J08_004450,	6	3.44	3.84	0.00392757	0.0832673	1
GO:0044272	sulfur compound biosynthetic process	61	5	B9J08_000058,B9J08_001205,B9J08_001884,B9J08_003099,B9J08_004450,	8.2	4.68	5.27	0.00403078	0.0832673	1
GO:1901617	organic hydroxy compound biosynthetic process	62	5	B9J08_000058,B9J08_001205,B9J08_001364,B9J08_003099,B9J08_004450,	8.1	4.6	5.17	0.00432504	0.0852944	1
GO:0034975	protein folding in endoplasmic reticulum	6	2	B9J08_001365,B9J08_002379,	33.3	19.02	28.71	0.00434621	0.0852944	1
GO:0015698	inorganic anion transport	21	3	B9J08_000034,B9J08_001464,B9J08_002202,	14.3	8.15	9.66	0.0054918	0.105148	1
GO:1990542	mitochondrial transmembrane transport	42	4	B9J08_000344,B9J08_003991,B9J08_004591,B9J08_005023,	9.5	5.44	6.15	0.0059091	0.109821	1
GO:0045041	protein import into mitochondrial intermembrane space	7	2	B9J08_000344,B9J08_003991,	28.6	16.31	22.96	0.00601568	0.109821	1
GO:0007005	mitochondrion organization	199	9	B9J08_000344,B9J08_001108,B9J08_002097,B9J08_003099,B9J08_003440,B9J08_003991,B9J08_004591,B9J08_004728,B9J08_005023,	4.5	2.58	2.86	0.00753013	0.134344	1
GO:0006817	phosphate ion transport	8	2	B9J08_001464,B9J08_002202,	25	14.27	19.13	0.00793005	0.138335	1
GO:1901615	organic hydroxy compound metabolic process	103	6	B9J08_000058,B9J08_001205,B9J08_001364,B9J08_003099,B9J08_004380,B9J08_004450,	5.8	3.32	3.66	0.00890434	0.151955	1
GO:0006801	superoxide metabolic process	9	2	B9J08_001744,B9J08_004396,	22.2	12.68	16.4	0.0100804	0.165714	1
GO:0071806	protein transmembrane transport	51	4	B9J08_000344,B9J08_002819,B9J08_003991,B9J08_005023,	7.8	4.48	4.97	0.0117162	0.165714	1
GO:0065002	intracellular protein transmembrane transport	51	4	B9J08_000344,B9J08_002819,B9J08_003991,B9J08_005023,	7.8	4.48	4.97	0.0117162	0.165714	1
GO:1901655	cellular response to ketone	1	1	B9J08_003819,	100	57.07	inf	0.0175214	0.165714	1
GO:1902318	synthesis of RNA primer involved in nuclear cell cycle DNA replication	1	1	B9J08_005515,	100	57.07	inf	0.0175214	0.165714	1
GO:0019265	glycine biosynthetic process, by transamination of glyoxylate	1	1	B9J08_002519,	100	57.07	inf	0.0175214	0.165714	1
GO:0120047	positive regulation of protein localization to medial cortical node	1	1	B9J08_005249,	100	57.07	inf	0.0175214	0.165714	1
GO:0106012	positive regulation of protein localization to medial cortex	1	1	B9J08_005249,	100	57.07	inf	0.0175214	0.165714	1
GO:0071307	cellular response to vitamin K	1	1	B9J08_003819,	100	57.07	inf	0.0175214	0.165714	1
GO:0071295	cellular response to vitamin	1	1	B9J08_003819,	100	57.07	inf	0.0175214	0.165714	1
GO:2001196	positive regulation of lysine biosynthetic process via alpha-aminoadipate and saccharopine	1	1	B9J08_001371,	100	57.07	inf	0.0175214	0.165714	1
GO:1904778	positive regulation of protein localization to cell cortex	1	1	B9J08_005249,	100	57.07	inf	0.0175214	0.165714	1
GO:1904776	regulation of protein localization to cell cortex	1	1	B9J08_005249,	100	57.07	inf	0.0175214	0.165714	1
GO:1900062	obsolete regulation of replicative cell aging	1	1	B9J08_001464,	100	57.07	inf	0.0175214	0.165714	1
GO:1902986	regulation of lysine biosynthetic process via aminoadipic acid	1	1	B9J08_001371,	100	57.07	inf	0.0175214	0.165714	1
GO:0018013	N-terminal peptidyl-glycine methylation	1	1	B9J08_005471,	100	57.07	inf	0.0175214	0.165714	1
GO:1902981	synthesis of RNA primer involved in mitotic DNA replication	1	1	B9J08_005515,	100	57.07	inf	0.0175214	0.165714	1
GO:1902295	synthesis of RNA primer involved in cell cycle DNA replication	1	1	B9J08_005515,	100	57.07	inf	0.0175214	0.165714	1
GO:1901654	response to ketone	1	1	B9J08_003819,	100	57.07	inf	0.0175214	0.165714	1
GO:0000708	meiotic strand invasion	1	1	B9J08_001108,	100	57.07	inf	0.0175214	0.165714	1
GO:0106011	regulation of protein localization to medial cortex	1	1	B9J08_005249,	100	57.07	inf	0.0175214	0.165714	1
GO:2001194	regulation of lysine biosynthetic process via alpha-aminoadipate and saccharopine	1	1	B9J08_001371,	100	57.07	inf	0.0175214	0.165714	1
GO:0034659	isopropylmalate transport	1	1	B9J08_000034,	100	57.07	inf	0.0175214	0.165714	1
GO:0033273	response to vitamin	1	1	B9J08_003819,	100	57.07	inf	0.0175214	0.165714	1
GO:0033194	response to hydroperoxide	1	1	B9J08_000645,	100	57.07	inf	0.0175214	0.165714	1
GO:0046484	oxazole or thiazole metabolic process	1	1	B9J08_003099,	100	57.07	inf	0.0175214	0.165714	1
GO:0052837	thiazole biosynthetic process	1	1	B9J08_003099,	100	57.07	inf	0.0175214	0.165714	1
GO:0052838	thiazole metabolic process	1	1	B9J08_003099,	100	57.07	inf	0.0175214	0.165714	1
GO:0032571	response to vitamin K	1	1	B9J08_003819,	100	57.07	inf	0.0175214	0.165714	1
GO:0070183	mitochondrial tryptophanyl-tRNA aminoacylation	1	1	B9J08_001095,	100	57.07	inf	0.0175214	0.165714	1
GO:0015729	oxaloacetate transport	1	1	B9J08_000034,	100	57.07	inf	0.0175214	0.165714	1
GO:0018201	peptidyl-glycine modification	1	1	B9J08_005471,	100	57.07	inf	0.0175214	0.165714	1
GO:0018131	oxazole or thiazole biosynthetic process	1	1	B9J08_003099,	100	57.07	inf	0.0175214	0.165714	1
GO:0015742	alpha-ketoglutarate transport	1	1	B9J08_004591,	100	57.07	inf	0.0175214	0.165714	1
GO:0120046	regulation of protein localization to medial cortical node	1	1	B9J08_005249,	100	57.07	inf	0.0175214	0.165714	1
GO:0010731	protein glutathionylation	1	1	B9J08_003819,	100	57.07	inf	0.0175214	0.165714	1
GO:0036245	cellular response to menadione	1	1	B9J08_003819,	100	57.07	inf	0.0175214	0.165714	1
GO:0006835	dicarboxylic acid transport	12	2	B9J08_000034,B9J08_004591,	16.7	9.51	11.47	0.0178623	0.166928	1
GO:1901564	organonitrogen compound metabolic process	1452	34	B9J08_000058,B9J08_000217,B9J08_000553,B9J08_000638,B9J08_000698,B9J08_001095,B9J08_001128,B9J08_001205,B9J08_001822,B9J08_001884,B9J08_002379,B9J08_002519,B9J08_002531,B9J08_002786,B9J08_002819,B9J08_002947,B9J08_003099,B9J08_003274,B9J08_003440,B9J08_003452,B9J08_003560,B9J08_003596,B9J08_003819,B9J08_003991,B9J08_004006,B9J08_004147,B9J08_004206,B9J08_004450,B9J08_004601,B9J08_005005,B9J08_005…	2.3	1.34	1.59	0.0281989	0.239547	1
GO:0030433	ubiquitin-dependent ERAD pathway	39	3	B9J08_002379,B9J08_002819,B9J08_004206,	7.7	4.39	4.81	0.0301319	0.239547	1
GO:0007533	mating type switching	16	2	B9J08_001108,B9J08_005515,	12.5	7.13	8.19	0.0310425	0.239547	1
GO:0044743	protein transmembrane import into intracellular organelle	40	3	B9J08_000344,B9J08_003991,B9J08_005023,	7.5	4.28	4.68	0.0321734	0.239547	1
GO:0044267	cellular protein metabolic process	954	24	B9J08_000217,B9J08_000553,B9J08_000638,B9J08_000698,B9J08_001095,B9J08_001128,B9J08_001822,B9J08_002379,B9J08_002786,B9J08_002819,B9J08_002947,B9J08_003274,B9J08_003560,B9J08_003596,B9J08_003819,B9J08_003991,B9J08_004006,B9J08_004147,B9J08_004206,B9J08_005005,B9J08_005249,B9J08_005362,B9J08_005471,B9J08_005586,	2.5	1.44	1.63	0.0342086	0.239547	1
GO:0035825	homologous recombination	41	3	B9J08_000425,B9J08_001108,B9J08_005515,	7.3	4.18	4.56	0.0342857	0.239547	1
GO:0036503	ERAD pathway	41	3	B9J08_002379,B9J08_002819,B9J08_004206,	7.3	4.18	4.56	0.0342857	0.239547	1
GO:0098656	anion transmembrane transport	41	3	B9J08_001464,B9J08_002202,B9J08_004591,	7.3	4.18	4.56	0.0342857	0.239547	1
GO:0019354	siroheme biosynthetic process	2	1	B9J08_002531,	50	28.54	56.75	0.0347394	0.239547	1
GO:0015746	citrate transport	2	1	B9J08_004591,	50	28.54	56.75	0.0347394	0.239547	1
GO:0006240	dCDP biosynthetic process	2	1	B9J08_004601,	50	28.54	56.75	0.0347394	0.239547	1
GO:0070125	mitochondrial translational elongation	2	1	B9J08_004147,	50	28.54	56.75	0.0347394	0.239547	1
GO:2000284	positive regulation of cellular amino acid biosynthetic process	2	1	B9J08_001371,	50	28.54	56.75	0.0347394	0.239547	1
GO:0006436	tryptophanyl-tRNA aminoacylation	2	1	B9J08_001095,	50	28.54	56.75	0.0347394	0.239547	1
GO:0046156	siroheme metabolic process	2	1	B9J08_002531,	50	28.54	56.75	0.0347394	0.239547	1
GO:0006842	tricarboxylic acid transport	2	1	B9J08_004591,	50	28.54	56.75	0.0347394	0.239547	1
GO:0046704	CDP metabolic process	2	1	B9J08_004601,	50	28.54	56.75	0.0347394	0.239547	1
GO:0035674	tricarboxylic acid transmembrane transport	2	1	B9J08_004591,	50	28.54	56.75	0.0347394	0.239547	1
GO:0000709	meiotic joint molecule formation	2	1	B9J08_001108,	50	28.54	56.75	0.0347394	0.239547	1
GO:0097080	plasma membrane selenite transport	2	1	B9J08_001464,	50	28.54	56.75	0.0347394	0.239547	1
GO:0006480	N-terminal protein amino acid methylation	2	1	B9J08_005471,	50	28.54	56.75	0.0347394	0.239547	1
GO:0006843	mitochondrial citrate transmembrane transport	2	1	B9J08_004591,	50	28.54	56.75	0.0347394	0.239547	1
GO:0042262	DNA protection	2	1	B9J08_000645,	50	28.54	56.75	0.0347394	0.239547	1
GO:0046062	dCDP metabolic process	2	1	B9J08_004601,	50	28.54	56.75	0.0347394	0.239547	1
GO:0042148	strand invasion	2	1	B9J08_001108,	50	28.54	56.75	0.0347394	0.239547	1
GO:1990546	mitochondrial tricarboxylic acid transmembrane transport	2	1	B9J08_004591,	50	28.54	56.75	0.0347394	0.239547	1
GO:1904377	positive regulation of protein localization to cell periphery	2	1	B9J08_005249,	50	28.54	56.75	0.0347394	0.239547	1
GO:0009193	pyrimidine ribonucleoside diphosphate metabolic process	2	1	B9J08_004601,	50	28.54	56.75	0.0347394	0.239547	1
GO:0090344	negative regulation of cell aging	2	1	B9J08_000645,	50	28.54	56.75	0.0347394	0.239547	1
GO:0000183	rDNA heterochromatin assembly	17	2	B9J08_001096,B9J08_005471,	11.8	6.71	7.64	0.0347877	0.239547	1
GO:1901701	cellular response to oxygen-containing compound	42	3	B9J08_000645,B9J08_002250,B9J08_003819,	7.1	4.08	4.44	0.0364685	0.248937	1
GO:0034641	cellular nitrogen compound metabolic process	1428	33	B9J08_000058,B9J08_000217,B9J08_000425,B9J08_000553,B9J08_000638,B9J08_000645,B9J08_000698,B9J08_001095,B9J08_001108,B9J08_001128,B9J08_001205,B9J08_001469,B9J08_001607,B9J08_001822,B9J08_001884,B9J08_002531,B9J08_002786,B9J08_002947,B9J08_003099,B9J08_003274,B9J08_003452,B9J08_003560,B9J08_003596,B9J08_003819,B9J08_003905,B9J08_004006,B9J08_004147,B9J08_004450,B9J08_004601,B9J08_005005,B9J08_005…	2.3	1.32	1.55	0.0374235	0.253155	1
GO:0007531	mating type determination	18	2	B9J08_001108,B9J08_005515,	11.1	6.34	7.16	0.0386988	0.253155	1
GO:0007530	sex determination	18	2	B9J08_001108,B9J08_005515,	11.1	6.34	7.16	0.0386988	0.253155	1
GO:0051204	protein insertion into mitochondrial membrane	18	2	B9J08_002097,B9J08_004728,	11.1	6.34	7.16	0.0386988	0.253155	1
GO:0045165	cell fate commitment	18	2	B9J08_001108,B9J08_005515,	11.1	6.34	7.16	0.0386988	0.253155	1
GO:0006066	alcohol metabolic process	76	4	B9J08_001205,B9J08_003099,B9J08_004380,B9J08_004450,	5.3	3	3.22	0.0433785	0.266793	1
GO:0046165	alcohol biosynthetic process	45	3	B9J08_001205,B9J08_003099,B9J08_004450,	6.7	3.8	4.12	0.0434357	0.266793	1
GO:0009250	glucan biosynthetic process	20	2	B9J08_000997,B9J08_002819,	10	5.71	6.36	0.0469913	0.266793	1
GO:0033692	cellular polysaccharide biosynthetic process	20	2	B9J08_000997,B9J08_002819,	10	5.71	6.36	0.0469913	0.266793	1
Molecular function
ID	Name	Bgd count	Result count	Result gene list	Pct of bgd	Fold enrichment	Odds ratio	P-value	Benjamini	Bonferroni
GO:0003735	structural constituent of ribosome	152	21	B9J08_000217,B9J08_000553,B9J08_000638,B9J08_000698,B9J08_001128,B9J08_001607,B9J08_001744,B9J08_001822,B9J08_002317,B9J08_002786,B9J08_002947,B9J08_003274,B9J08_003560,B9J08_003596,B9J08_003930,B9J08_004006,B9J08_004269,B9J08_004396,B9J08_005005,B9J08_005012,B9J08_005362,	13.8	7.89	11.74	4.71346e-14	1.23493e-11	1.23493e-11
GO:0005198	structural molecule activity	215	21	B9J08_000217,B9J08_000553,B9J08_000638,B9J08_000698,B9J08_001128,B9J08_001607,B9J08_001744,B9J08_001822,B9J08_002317,B9J08_002786,B9J08_002947,B9J08_003274,B9J08_003560,B9J08_003596,B9J08_003930,B9J08_004006,B9J08_004269,B9J08_004396,B9J08_005005,B9J08_005012,B9J08_005362,	9.8	5.57	7.82	4.70105e-11	6.15837e-09	1.23167e-08
GO:0016209	antioxidant activity	21	4	B9J08_000645,B9J08_001744,B9J08_003819,B9J08_004396,	19	10.87	13.82	0.000417621	0.0364723	0.109417
GO:0016491	oxidoreductase activity	360	15	B9J08_000144,B9J08_000344,B9J08_000419,B9J08_000645,B9J08_001281,B9J08_001364,B9J08_001365,B9J08_001744,B9J08_002531,B9J08_003440,B9J08_003819,B9J08_004114,B9J08_004396,B9J08_004583,B9J08_004601,	4.2	2.38	2.76	0.00123378	0.0582518	0.323249
GO:0016721	oxidoreductase activity, acting on superoxide radicals as acceptor	4	2	B9J08_001744,B9J08_004396,	50	28.54	57.45	0.00177868	0.0582518	0.466014
GO:0016972	thiol oxidase activity	4	2	B9J08_000344,B9J08_001365,	50	28.54	57.45	0.00177868	0.0582518	0.466014
GO:0004784	superoxide dismutase activity	4	2	B9J08_001744,B9J08_004396,	50	28.54	57.45	0.00177868	0.0582518	0.466014
GO:0016670	oxidoreductase activity, acting on a sulfur group of donors, oxygen as acceptor	4	2	B9J08_000344,B9J08_001365,	50	28.54	57.45	0.00177868	0.0582518	0.466014
GO:0051087	chaperone binding	16	3	B9J08_002379,B9J08_003991,B9J08_005023,	18.8	10.7	13.39	0.00246286	0.0716966	0.64527
GO:0015035	protein-disulfide reductase activity	19	3	B9J08_000344,B9J08_001365,B9J08_003819,	15.8	9.01	10.88	0.00410327	0.0948923	1
GO:0015036	disulfide oxidoreductase activity	19	3	B9J08_000344,B9J08_001365,B9J08_003819,	15.8	9.01	10.88	0.00410327	0.0948923	1
GO:0005315	inorganic phosphate transmembrane transporter activity	6	2	B9J08_001464,B9J08_002202,	33.3	19.02	28.71	0.00434621	0.0948923	1
GO:0051082	unfolded protein binding	68	5	B9J08_000645,B9J08_002379,B9J08_002819,B9J08_003991,B9J08_004206,	7.4	4.2	4.67	0.00642102	0.123156	1
GO:0051539	4 iron, 4 sulfur cluster binding	26	3	B9J08_000419,B9J08_001884,B9J08_005515,	11.5	6.59	7.55	0.0100821	0.123156	1
GO:0016667	oxidoreductase activity, acting on a sulfur group of donors	27	3	B9J08_000344,B9J08_001365,B9J08_003819,	11.1	6.34	7.24	0.011201	0.123156	1
GO:0008466	glycogenin glucosyltransferase activity	1	1	B9J08_000997,	100	57.07	inf	0.0175214	0.123156	1
GO:0019150	D-ribulokinase activity	1	1	B9J08_000994,	100	57.07	inf	0.0175214	0.123156	1
GO:0016843	amine-lyase activity	1	1	B9J08_000058,	100	57.07	inf	0.0175214	0.123156	1
GO:0004455	ketol-acid reductoisomerase activity	1	1	B9J08_003440,	100	57.07	inf	0.0175214	0.123156	1
GO:0004370	glycerol kinase activity	1	1	B9J08_004380,	100	57.07	inf	0.0175214	0.123156	1
GO:0004076	biotin synthase activity	1	1	B9J08_001884,	100	57.07	inf	0.0175214	0.123156	1
GO:1901239	malonate(1-) transmembrane transporter activity	1	1	B9J08_000034,	100	57.07	inf	0.0175214	0.123156	1
GO:0016649	oxidoreductase activity, acting on the CH-NH group of donors, quinone or similar compound as acceptor	1	1	B9J08_000419,	100	57.07	inf	0.0175214	0.123156	1
GO:0004174	electron-transferring-flavoprotein dehydrogenase activity	1	1	B9J08_000419,	100	57.07	inf	0.0175214	0.123156	1
GO:0034658	isopropylmalate transmembrane transporter activity	1	1	B9J08_000034,	100	57.07	inf	0.0175214	0.123156	1
GO:1905334	Swi5-Sfr1 complex binding	1	1	B9J08_001108,	100	57.07	inf	0.0175214	0.123156	1
GO:0036381	pyridoxal 5'-phosphate synthase (glutamine hydrolysing) activity	1	1	B9J08_000058,	100	57.07	inf	0.0175214	0.123156	1
GO:0004851	uroporphyrin-III C-methyltransferase activity	1	1	B9J08_002531,	100	57.07	inf	0.0175214	0.123156	1
GO:0015319	sodium:inorganic phosphate symporter activity	1	1	B9J08_002202,	100	57.07	inf	0.0175214	0.123156	1
GO:0004417	hydroxyethylthiazole kinase activity	1	1	B9J08_001205,	100	57.07	inf	0.0175214	0.123156	1
GO:0004789	thiamine-phosphate diphosphorylase activity	1	1	B9J08_001205,	100	57.07	inf	0.0175214	0.123156	1
GO:0097079	selenite:proton symporter activity	1	1	B9J08_001464,	100	57.07	inf	0.0175214	0.123156	1
GO:0005436	sodium:phosphate symporter activity	1	1	B9J08_002202,	100	57.07	inf	0.0175214	0.123156	1
GO:0008453	alanine-glyoxylate transaminase activity	1	1	B9J08_002519,	100	57.07	inf	0.0175214	0.123156	1
GO:0004760	serine-pyruvate transaminase activity	1	1	B9J08_002519,	100	57.07	inf	0.0175214	0.123156	1
GO:0015131	oxaloacetate transmembrane transporter activity	1	1	B9J08_000034,	100	57.07	inf	0.0175214	0.123156	1
GO:0015293	symporter activity	12	2	B9J08_001464,B9J08_002202,	16.7	9.51	11.47	0.0178623	0.123156	1
GO:0015294	solute:cation symporter activity	12	2	B9J08_001464,B9J08_002202,	16.7	9.51	11.47	0.0178623	0.123156	1
GO:0050660	flavin adenine dinucleotide binding	38	3	B9J08_001281,B9J08_001365,B9J08_003819,	7.9	4.51	4.95	0.0281616	0.175033	1
GO:0004830	tryptophan-tRNA ligase activity	2	1	B9J08_001095,	50	28.54	56.75	0.0347394	0.175033	1
GO:0051063	CDP reductase activity	2	1	B9J08_004601,	50	28.54	56.75	0.0347394	0.175033	1
GO:0140597	protein carrier chaperone	2	1	B9J08_004728,	50	28.54	56.75	0.0347394	0.175033	1
GO:0016971	flavin-linked sulfhydryl oxidase activity	2	1	B9J08_000344,	50	28.54	56.75	0.0347394	0.175033	1
GO:0032977	membrane insertase activity	2	1	B9J08_004728,	50	28.54	56.75	0.0347394	0.175033	1
GO:0003867	4-aminobutyrate transaminase activity	2	1	B9J08_003452,	50	28.54	56.75	0.0347394	0.175033	1
GO:0034386	4-aminobutyrate:2-oxoglutarate transaminase activity	2	1	B9J08_003452,	50	28.54	56.75	0.0347394	0.175033	1
GO:0004362	glutathione-disulfide reductase (NADPH) activity	2	1	B9J08_003819,	50	28.54	56.75	0.0347394	0.175033	1
GO:0071885	N-terminal protein N-methyltransferase activity	2	1	B9J08_005471,	50	28.54	56.75	0.0347394	0.175033	1
GO:0005094	Rho GDP-dissociation inhibitor activity	2	1	B9J08_000555,	50	28.54	56.75	0.0347394	0.175033	1
GO:0008650	rRNA (uridine-2'-O-)-methyltransferase activity	2	1	B9J08_003905,	50	28.54	56.75	0.0347394	0.175033	1
GO:0005371	tricarboxylate secondary active transmembrane transporter activity	2	1	B9J08_004591,	50	28.54	56.75	0.0347394	0.175033	1
GO:0043115	precorrin-2 dehydrogenase activity	2	1	B9J08_002531,	50	28.54	56.75	0.0347394	0.175033	1
GO:0003690	double-stranded DNA binding	141	6	B9J08_001108,B9J08_001371,B9J08_002326,B9J08_003440,B9J08_003991,B9J08_005515,	4.3	2.43	2.61	0.036185	0.17694	1
GO:0015291	secondary active transmembrane transporter activity	42	3	B9J08_001464,B9J08_002202,B9J08_004591,	7.1	4.08	4.44	0.0364685	0.17694	1
GO:0051540	metal cluster binding	47	3	B9J08_000419,B9J08_001884,B9J08_005515,	6.4	3.64	3.93	0.0484242	0.205072	1
GO:0051536	iron-sulfur cluster binding	47	3	B9J08_000419,B9J08_001884,B9J08_005515,	6.4	3.64	3.93	0.0484242	0.205072	1
Cellular component
ID	Name	Bgd count	Result count	Result gene list	Pct of bgd	Fold enrichment	Odds ratio	P-value	Benjamini	Bonferroni
GO:0005761	mitochondrial ribosome	78	21	B9J08_000217,B9J08_000553,B9J08_000638,B9J08_000698,B9J08_001128,B9J08_001607,B9J08_001744,B9J08_001822,B9J08_002317,B9J08_002786,B9J08_002947,B9J08_003274,B9J08_003560,B9J08_003596,B9J08_003930,B9J08_004006,B9J08_004269,B9J08_004396,B9J08_005005,B9J08_005012,B9J08_005362,	26.9	15.37	27.43	2.19227e-20	1.96208e-18	3.92416e-18
GO:0000313	organellar ribosome	78	21	B9J08_000217,B9J08_000553,B9J08_000638,B9J08_000698,B9J08_001128,B9J08_001607,B9J08_001744,B9J08_001822,B9J08_002317,B9J08_002786,B9J08_002947,B9J08_003274,B9J08_003560,B9J08_003596,B9J08_003930,B9J08_004006,B9J08_004269,B9J08_004396,B9J08_005005,B9J08_005012,B9J08_005362,	26.9	15.37	27.43	2.19227e-20	1.96208e-18	3.92416e-18
GO:0005759	mitochondrial matrix	175	27	B9J08_000217,B9J08_000425,B9J08_000553,B9J08_000638,B9J08_000698,B9J08_001108,B9J08_001128,B9J08_001607,B9J08_001744,B9J08_001822,B9J08_002317,B9J08_002786,B9J08_002947,B9J08_003274,B9J08_003440,B9J08_003560,B9J08_003596,B9J08_003930,B9J08_003991,B9J08_004006,B9J08_004269,B9J08_004396,B9J08_004591,B9J08_005005,B9J08_005012,B9J08_005023,B9J08_005362,	15.4	8.81	14.76	2.33454e-19	1.39294e-17	4.17882e-17
GO:0098798	mitochondrial protein-containing complex	166	23	B9J08_000217,B9J08_000553,B9J08_000638,B9J08_000698,B9J08_001128,B9J08_001607,B9J08_001744,B9J08_001822,B9J08_002097,B9J08_002317,B9J08_002786,B9J08_002947,B9J08_003274,B9J08_003560,B9J08_003596,B9J08_003930,B9J08_004006,B9J08_004269,B9J08_004396,B9J08_005005,B9J08_005012,B9J08_005023,B9J08_005362,	13.9	7.91	12.14	2.13843e-15	9.56945e-14	3.82778e-13
GO:0005739	mitochondrion	601	39	B9J08_000034,B9J08_000217,B9J08_000344,B9J08_000419,B9J08_000425,B9J08_000553,B9J08_000638,B9J08_000698,B9J08_001095,B9J08_001108,B9J08_001128,B9J08_001281,B9J08_001607,B9J08_001744,B9J08_001822,B9J08_002097,B9J08_002317,B9J08_002786,B9J08_002947,B9J08_003274,B9J08_003440,B9J08_003560,B9J08_003596,B9J08_003819,B9J08_003905,B9J08_003930,B9J08_003991,B9J08_004006,B9J08_004147,B9J08_004269,B9J08_004…	6.5	3.7	6.51	9.81847e-15	3.51501e-13	1.75751e-12
GO:0044391	ribosomal subunit	146	21	B9J08_000217,B9J08_000553,B9J08_000638,B9J08_000698,B9J08_001128,B9J08_001607,B9J08_001744,B9J08_001822,B9J08_002317,B9J08_002786,B9J08_002947,B9J08_003274,B9J08_003560,B9J08_003596,B9J08_003930,B9J08_004006,B9J08_004269,B9J08_004396,B9J08_005005,B9J08_005012,B9J08_005362,	14.4	8.21	12.32	2.05297e-14	6.12469e-13	3.67481e-12
GO:0005840	ribosome	183	21	B9J08_000217,B9J08_000553,B9J08_000638,B9J08_000698,B9J08_001128,B9J08_001607,B9J08_001744,B9J08_001822,B9J08_002317,B9J08_002786,B9J08_002947,B9J08_003274,B9J08_003560,B9J08_003596,B9J08_003930,B9J08_004006,B9J08_004269,B9J08_004396,B9J08_005005,B9J08_005012,B9J08_005362,	11.5	6.55	9.43	2.00979e-12	5.13933e-11	3.59753e-10
GO:0005762	mitochondrial large ribosomal subunit	44	12	B9J08_000217,B9J08_000698,B9J08_001128,B9J08_001607,B9J08_002317,B9J08_002786,B9J08_003274,B9J08_003596,B9J08_003930,B9J08_004006,B9J08_004269,B9J08_005005,	27.3	15.57	24.46	4.91851e-12	9.78237e-11	8.80413e-10
GO:0000315	organellar large ribosomal subunit	44	12	B9J08_000217,B9J08_000698,B9J08_001128,B9J08_001607,B9J08_002317,B9J08_002786,B9J08_003274,B9J08_003596,B9J08_003930,B9J08_004006,B9J08_004269,B9J08_005005,	27.3	15.57	24.46	4.91851e-12	9.78237e-11	8.80413e-10
GO:0000314	organellar small ribosomal subunit	30	9	B9J08_000553,B9J08_000638,B9J08_001744,B9J08_001822,B9J08_002947,B9J08_003560,B9J08_004396,B9J08_005012,B9J08_005362,	30	17.12	26.87	1.05715e-09	1.72028e-08	1.89231e-07
GO:0005763	mitochondrial small ribosomal subunit	30	9	B9J08_000553,B9J08_000638,B9J08_001744,B9J08_001822,B9J08_002947,B9J08_003560,B9J08_004396,B9J08_005012,B9J08_005362,	30	17.12	26.87	1.05715e-09	1.72028e-08	1.89231e-07
GO:0015934	large ribosomal subunit	91	12	B9J08_000217,B9J08_000698,B9J08_001128,B9J08_001607,B9J08_002317,B9J08_002786,B9J08_003274,B9J08_003596,B9J08_003930,B9J08_004006,B9J08_004269,B9J08_005005,	13.2	7.53	9.81	3.80618e-08	5.67755e-07	6.81306e-06
GO:1990904	ribonucleoprotein complex	406	23	B9J08_000217,B9J08_000553,B9J08_000638,B9J08_000645,B9J08_000698,B9J08_001128,B9J08_001607,B9J08_001744,B9J08_001822,B9J08_002317,B9J08_002786,B9J08_002947,B9J08_003274,B9J08_003560,B9J08_003596,B9J08_003930,B9J08_003991,B9J08_004006,B9J08_004269,B9J08_004396,B9J08_005005,B9J08_005012,B9J08_005362,	5.7	3.23	4.29	2.21314e-07	3.04733e-06	3.96152e-05
GO:0015935	small ribosomal subunit	55	9	B9J08_000553,B9J08_000638,B9J08_001744,B9J08_001822,B9J08_002947,B9J08_003560,B9J08_004396,B9J08_005012,B9J08_005362,	16.4	9.34	12.2	3.29543e-07	4.21344e-06	5.89882e-05
GO:0070013	intracellular organelle lumen	767	32	B9J08_000217,B9J08_000344,B9J08_000425,B9J08_000553,B9J08_000638,B9J08_000698,B9J08_001108,B9J08_001128,B9J08_001469,B9J08_001607,B9J08_001744,B9J08_001822,B9J08_002317,B9J08_002379,B9J08_002786,B9J08_002819,B9J08_002947,B9J08_003274,B9J08_003440,B9J08_003560,B9J08_003596,B9J08_003930,B9J08_003991,B9J08_004006,B9J08_004269,B9J08_004396,B9J08_004591,B9J08_005005,B9J08_005012,B9J08_005023,B9J08_005…	4.2	2.38	3.36	6.1033e-07	6.42642e-06	0.000109249
GO:0043233	organelle lumen	767	32	B9J08_000217,B9J08_000344,B9J08_000425,B9J08_000553,B9J08_000638,B9J08_000698,B9J08_001108,B9J08_001128,B9J08_001469,B9J08_001607,B9J08_001744,B9J08_001822,B9J08_002317,B9J08_002379,B9J08_002786,B9J08_002819,B9J08_002947,B9J08_003274,B9J08_003440,B9J08_003560,B9J08_003596,B9J08_003930,B9J08_003991,B9J08_004006,B9J08_004269,B9J08_004396,B9J08_004591,B9J08_005005,B9J08_005012,B9J08_005023,B9J08_005…	4.2	2.38	3.36	6.1033e-07	6.42642e-06	0.000109249
GO:0031974	membrane-enclosed lumen	767	32	B9J08_000217,B9J08_000344,B9J08_000425,B9J08_000553,B9J08_000638,B9J08_000698,B9J08_001108,B9J08_001128,B9J08_001469,B9J08_001607,B9J08_001744,B9J08_001822,B9J08_002317,B9J08_002379,B9J08_002786,B9J08_002819,B9J08_002947,B9J08_003274,B9J08_003440,B9J08_003560,B9J08_003596,B9J08_003930,B9J08_003991,B9J08_004006,B9J08_004269,B9J08_004396,B9J08_004591,B9J08_005005,B9J08_005012,B9J08_005023,B9J08_005…	4.2	2.38	3.36	6.1033e-07	6.42642e-06	0.000109249
GO:0042645	mitochondrial nucleoid	21	4	B9J08_002786,B9J08_003440,B9J08_003991,B9J08_004591,	19	10.87	13.82	0.000417621	0.00393443	0.0747542
GO:0009295	nucleoid	21	4	B9J08_002786,B9J08_003440,B9J08_003991,B9J08_004591,	19	10.87	13.82	0.000417621	0.00393443	0.0747542
GO:0005737	cytoplasm	2241	53	B9J08_000034,B9J08_000217,B9J08_000344,B9J08_000419,B9J08_000425,B9J08_000553,B9J08_000555,B9J08_000638,B9J08_000645,B9J08_000698,B9J08_001095,B9J08_001108,B9J08_001128,B9J08_001205,B9J08_001281,B9J08_001365,B9J08_001607,B9J08_001744,B9J08_001822,B9J08_002097,B9J08_002317,B9J08_002379,B9J08_002720,B9J08_002786,B9J08_002819,B9J08_002947,B9J08_003099,B9J08_003274,B9J08_003440,B9J08_003560,B9J08_003…	2.4	1.35	2.01	0.00152541	0.0136524	0.273048
GO:0043232	intracellular non-membrane-bounded organelle	986	29	B9J08_000217,B9J08_000553,B9J08_000638,B9J08_000698,B9J08_001108,B9J08_001128,B9J08_001469,B9J08_001607,B9J08_001744,B9J08_001822,B9J08_002317,B9J08_002612,B9J08_002720,B9J08_002786,B9J08_002947,B9J08_003274,B9J08_003440,B9J08_003560,B9J08_003596,B9J08_003930,B9J08_003991,B9J08_004006,B9J08_004269,B9J08_004396,B9J08_004591,B9J08_005005,B9J08_005012,B9J08_005362,B9J08_005515,	2.9	1.68	2.08	0.00183165	0.014903	0.327866
GO:0043228	non-membrane-bounded organelle	986	29	B9J08_000217,B9J08_000553,B9J08_000638,B9J08_000698,B9J08_001108,B9J08_001128,B9J08_001469,B9J08_001607,B9J08_001744,B9J08_001822,B9J08_002317,B9J08_002612,B9J08_002720,B9J08_002786,B9J08_002947,B9J08_003274,B9J08_003440,B9J08_003560,B9J08_003596,B9J08_003930,B9J08_003991,B9J08_004006,B9J08_004269,B9J08_004396,B9J08_004591,B9J08_005005,B9J08_005012,B9J08_005362,B9J08_005515,	2.9	1.68	2.08	0.00183165	0.014903	0.327866
GO:0110115	Cdr2 medial cortical node complex	1	1	B9J08_005249,	100	57.07	inf	0.0175214	0.119276	1
GO:0099020	perinuclear endoplasmic reticulum lumen	1	1	B9J08_002819,	100	57.07	inf	0.0175214	0.119276	1
GO:0099021	cortical endoplasmic reticulum lumen	1	1	B9J08_002819,	100	57.07	inf	0.0175214	0.119276	1
GO:0005788	endoplasmic reticulum lumen	12	2	B9J08_002379,B9J08_002819,	16.7	9.51	11.47	0.0178623	0.119276	1
GO:0044444	obsolete cytoplasmic part	756	21	B9J08_000217,B9J08_000419,B9J08_000425,B9J08_000638,B9J08_000645,B9J08_001095,B9J08_001205,B9J08_001281,B9J08_001365,B9J08_002819,B9J08_003099,B9J08_003440,B9J08_003819,B9J08_003905,B9J08_003930,B9J08_003991,B9J08_004147,B9J08_004206,B9J08_004380,B9J08_004494,B9J08_004591,	2.8	1.59	1.81	0.0179914	0.119276	1
GO:0005971	ribonucleoside-diphosphate reductase complex	2	1	B9J08_004601,	50	28.54	56.75	0.0347394	0.207279	1
GO:0036437	Isw1b complex	2	1	B9J08_002612,	50	28.54	56.75	0.0347394	0.207279	1
GO:1903600	glutaminase complex	2	1	B9J08_000058,	50	28.54	56.75	0.0347394	0.207279	1
KEGG
ID	Name	Bgd count	Result count	Result gene list	Pct of bgd	Fold enrichment	Odds ratio	P-value	Benjamini	Bonferroni
ec00260__PK__KEGG	Glycine, serine and threonine metabolism	82	5	B9J08_000144,B9J08_002519,B9J08_002690,B9J08_003819,B9J08_004583,	6.1	3.08	3.62	0.0204152	0.750458	1

## Sheet: Sheet3
Sheet 3	Untreated WT vs. untreated non-WT
Species	Platform:	Type of genes	Criteria	Number of genes
C. auris	Candida Genome Database	upregulated	DEG; FC>1.5	760
Biological process
GOID	GO_term	Cluster frequency	Background frequency	Corrected P-value	False discovery rate	Gene(s) annotated to the term	Directly Annotated GOID List
6412	translation	112 out of 760 genes, 14.7%	255 out of 5417 background genes, 4.7%	6.86e-30	0	B9J08_000064:B9J08_000090:B9J08_000091:B9J08_000102:B9J08_000107:B9J08_000136:B9J08_000142:B9J08_000185:B9J08_000203:B9J08_000209:B9J08_000217:B9J08_000254:B9J08_000346:B9J08_000425:B9J08_000461:B9J08_000554:B9J08_000604:B9J08_000605:B9J08_000632:B9J08_000711:B9J08_000727:B9J08_000771:B9J08_000878:B9J08_000955:B9J08_000975:B9J08_000998:B9J08_001081:B9J08_001128:B9J08_001278:B9J08_001561:B9J08_001…	51083:6397:1902660:97010:7131:288:31139:6413:2000640:10629:45944:70125:32436:55:1904689:6449:27:72344:1901195:42274:463:140469:2000639:447:2182:2000765:462:6421:42254:45905:70124:42149:1903272:1903138:1990145:1731:70156:6450:56:17148:54:470:7186:45948:42255:6414:2109:61157:32543:28:30490:6351:6521:6432:6366:8033:1903753:70651:2183:34599:10508:43039:6452:2001125:6364:2181:34063:6412:31571:45903:46…
1901566	organonitrogen compound biosynthetic process	171 out of 760 genes, 22.5%	656 out of 5417 background genes, 12.1%	1.69e-15	0	B9J08_000013:B9J08_000058:B9J08_000064:B9J08_000075:B9J08_000090:B9J08_000091:B9J08_000102:B9J08_000107:B9J08_000136:B9J08_000142:B9J08_000174:B9J08_000185:B9J08_000203:B9J08_000209:B9J08_000217:B9J08_000229:B9J08_000254:B9J08_000346:B9J08_000425:B9J08_000461:B9J08_000465:B9J08_000554:B9J08_000604:B9J08_000605:B9J08_000632:B9J08_000668:B9J08_000686:B9J08_000711:B9J08_000727:B9J08_000740:B9J08_000…	6397:32:1902660:97010:6974:31139:10629:6535:45944:55:6784:27:463:42274:71704:6567:9272:6168:43103:2000765:6458:19343:9097:19346:6486:42254:6520:8615:70124:1903272:30950:6241:42819:1903138:45984:10133:6807:45048:1990145:6541:1731:30010:6450:6529:9082:46686:17148:917:34975:2:19265:6240:35269:19676:6779:6561:2109:61157:32543:42823:30490:6351:43101:17157:6432:6366:1903753:8610:2183:6228:34599:46704:4…
9185	ribonucleoside diphosphate metabolic process	15 out of 760 genes, 2.0%	19 out of 5417 background genes, 0.4%	3.84e-07	0	B9J08_000274:B9J08_000808:B9J08_001860:B9J08_001875:B9J08_002566:B9J08_003371:B9J08_003632:B9J08_003836:B9J08_004309:B9J08_004375:B9J08_004601:B9J08_004928:B9J08_004965:B9J08_005226:B9J08_005239	6096:6006:32889:6002:70072:7035:51453:6090:1990539:6240:42866:46704:9263:1678:1901135:6235:5975:61621:6013:2001234:6094:6260:46323:6000:30388:46015
46032	ADP catabolic process	13 out of 760 genes, 1.7%	15 out of 5417 background genes, 0.3%	7.2e-07	0	B9J08_000274:B9J08_000808:B9J08_001860:B9J08_001875:B9J08_002566:B9J08_003371:B9J08_003632:B9J08_003836:B9J08_004309:B9J08_004375:B9J08_004928:B9J08_005226:B9J08_005239	6096:6006:32889:6002:70072:7035:51453:6090:1990539:42866:1678:1901135:5975:61621:6013:2001234:6094:46323:6000:30388:46015
6096	glycolytic process	13 out of 760 genes, 1.7%	15 out of 5417 background genes, 0.3%	7.2e-07	0	B9J08_000274:B9J08_000808:B9J08_001860:B9J08_001875:B9J08_002566:B9J08_003371:B9J08_003632:B9J08_003836:B9J08_004309:B9J08_004375:B9J08_004928:B9J08_005226:B9J08_005239	6096:6006:32889:6002:70072:7035:51453:6090:1990539:42866:1678:1901135:5975:61621:6013:2001234:6094:46323:6000:30388:46015
9134	nucleoside diphosphate catabolic process	13 out of 760 genes, 1.7%	15 out of 5417 background genes, 0.3%	7.2e-07	0	B9J08_000274:B9J08_000808:B9J08_001860:B9J08_001875:B9J08_002566:B9J08_003371:B9J08_003632:B9J08_003836:B9J08_004309:B9J08_004375:B9J08_004928:B9J08_005226:B9J08_005239	6096:6006:32889:6002:70072:7035:51453:6090:1990539:42866:1678:1901135:5975:61621:6013:2001234:6094:46323:6000:30388:46015
9137	purine nucleoside diphosphate catabolic process	13 out of 760 genes, 1.7%	15 out of 5417 background genes, 0.3%	7.2e-07	0	B9J08_000274:B9J08_000808:B9J08_001860:B9J08_001875:B9J08_002566:B9J08_003371:B9J08_003632:B9J08_003836:B9J08_004309:B9J08_004375:B9J08_004928:B9J08_005226:B9J08_005239	6096:6006:32889:6002:70072:7035:51453:6090:1990539:42866:1678:1901135:5975:61621:6013:2001234:6094:46323:6000:30388:46015
9181	purine ribonucleoside diphosphate catabolic process	13 out of 760 genes, 1.7%	15 out of 5417 background genes, 0.3%	7.2e-07	0	B9J08_000274:B9J08_000808:B9J08_001860:B9J08_001875:B9J08_002566:B9J08_003371:B9J08_003632:B9J08_003836:B9J08_004309:B9J08_004375:B9J08_004928:B9J08_005226:B9J08_005239	6096:6006:32889:6002:70072:7035:51453:6090:1990539:42866:1678:1901135:5975:61621:6013:2001234:6094:46323:6000:30388:46015
9191	ribonucleoside diphosphate catabolic process	13 out of 760 genes, 1.7%	15 out of 5417 background genes, 0.3%	7.2e-07	0	B9J08_000274:B9J08_000808:B9J08_001860:B9J08_001875:B9J08_002566:B9J08_003371:B9J08_003632:B9J08_003836:B9J08_004309:B9J08_004375:B9J08_004928:B9J08_005226:B9J08_005239	6096:6006:32889:6002:70072:7035:51453:6090:1990539:42866:1678:1901135:5975:61621:6013:2001234:6094:46323:6000:30388:46015
9132	nucleoside diphosphate metabolic process	15 out of 760 genes, 2.0%	20 out of 5417 background genes, 0.4%	1.33e-06	0	B9J08_000274:B9J08_000808:B9J08_001860:B9J08_001875:B9J08_002566:B9J08_003371:B9J08_003632:B9J08_003836:B9J08_004309:B9J08_004375:B9J08_004601:B9J08_004928:B9J08_004965:B9J08_005226:B9J08_005239	6096:6006:32889:6002:70072:7035:51453:6090:1990539:6240:42866:46704:9263:1678:1901135:6235:5975:61621:6013:2001234:6094:6260:46323:6000:30388:46015
19364	pyridine nucleotide catabolic process	13 out of 760 genes, 1.7%	16 out of 5417 background genes, 0.3%	3.35e-06	0	B9J08_000274:B9J08_000808:B9J08_001860:B9J08_001875:B9J08_002566:B9J08_003371:B9J08_003632:B9J08_003836:B9J08_004309:B9J08_004375:B9J08_004928:B9J08_005226:B9J08_005239	6096:6006:32889:6002:70072:7035:51453:6090:1990539:42866:1678:1901135:5975:61621:6013:2001234:6094:46323:6000:30388:46015
46031	ADP metabolic process	13 out of 760 genes, 1.7%	16 out of 5417 background genes, 0.3%	3.35e-06	0	B9J08_000274:B9J08_000808:B9J08_001860:B9J08_001875:B9J08_002566:B9J08_003371:B9J08_003632:B9J08_003836:B9J08_004309:B9J08_004375:B9J08_004928:B9J08_005226:B9J08_005239	6096:6006:32889:6002:70072:7035:51453:6090:1990539:42866:1678:1901135:5975:61621:6013:2001234:6094:46323:6000:30388:46015
72526	pyridine-containing compound catabolic process	13 out of 760 genes, 1.7%	16 out of 5417 background genes, 0.3%	3.35e-06	0	B9J08_000274:B9J08_000808:B9J08_001860:B9J08_001875:B9J08_002566:B9J08_003371:B9J08_003632:B9J08_003836:B9J08_004309:B9J08_004375:B9J08_004928:B9J08_005226:B9J08_005239	6096:6006:32889:6002:70072:7035:51453:6090:1990539:42866:1678:1901135:5975:61621:6013:2001234:6094:46323:6000:30388:46015
9135	purine nucleoside diphosphate metabolic process	13 out of 760 genes, 1.7%	17 out of 5417 background genes, 0.3%	1.24e-05	0	B9J08_000274:B9J08_000808:B9J08_001860:B9J08_001875:B9J08_002566:B9J08_003371:B9J08_003632:B9J08_003836:B9J08_004309:B9J08_004375:B9J08_004928:B9J08_005226:B9J08_005239	6096:6006:32889:6002:70072:7035:51453:6090:1990539:42866:1678:1901135:5975:61621:6013:2001234:6094:46323:6000:30388:46015
9179	purine ribonucleoside diphosphate metabolic process	13 out of 760 genes, 1.7%	17 out of 5417 background genes, 0.3%	1.24e-05	0	B9J08_000274:B9J08_000808:B9J08_001860:B9J08_001875:B9J08_002566:B9J08_003371:B9J08_003632:B9J08_003836:B9J08_004309:B9J08_004375:B9J08_004928:B9J08_005226:B9J08_005239	6096:6006:32889:6002:70072:7035:51453:6090:1990539:42866:1678:1901135:5975:61621:6013:2001234:6094:46323:6000:30388:46015
1901564	organonitrogen compound metabolic process	249 out of 760 genes, 32.8%	1329 out of 5417 background genes, 24.5%	2.33e-05	0	B9J08_000013:B9J08_000058:B9J08_000064:B9J08_000075:B9J08_000090:B9J08_000091:B9J08_000102:B9J08_000107:B9J08_000136:B9J08_000142:B9J08_000174:B9J08_000185:B9J08_000203:B9J08_000209:B9J08_000217:B9J08_000229:B9J08_000254:B9J08_000274:B9J08_000290:B9J08_000346:B9J08_000425:B9J08_000445:B9J08_000446:B9J08_000458:B9J08_000461:B9J08_000465:B9J08_000483:B9J08_000554:B9J08_000604:B9J08_000605:B9J08_000…	32:1902660:97010:6974:6006:32889:60258:6535:2000370:45944:921:55:9072:1932:6002:6281:463:71704:55085:6567:43409:9272:1402:43103:6399:6458:19343:9097:42254:11:2000247:8615:492:1903272:30950:45984:6807:45048:1990145:6541:10731:7232:10972:6673:226:6529:43248:9082:32220:6090:6749:51229:35719:1990539:917:19265:34975:6240:46827:42167:6511:19676:71470:32995:6561:38066:42276:7023:61157:42823:42307:190293…
6407	rRNA export from nucleus	10 out of 760 genes, 1.3%	11 out of 5417 background genes, 0.2%	3.26e-05	0	B9J08_000091:B9J08_000142:B9J08_001974:B9J08_003107:B9J08_003273:B9J08_003288:B9J08_003755:B9J08_004067:B9J08_004990:B9J08_005324	463:1990145:447:70651:45903:1900153:42274:30490:2181:6412:6407:56:42255:28:461
9154	purine ribonucleotide catabolic process	13 out of 760 genes, 1.7%	18 out of 5417 background genes, 0.3%	3.89e-05	0	B9J08_000274:B9J08_000808:B9J08_001860:B9J08_001875:B9J08_002566:B9J08_003371:B9J08_003632:B9J08_003836:B9J08_004309:B9J08_004375:B9J08_004928:B9J08_005226:B9J08_005239	6006:32889:6002:6090:1990539:1678:2001234:6000:46015:6096:70072:7035:51453:42866:1901135:5975:61621:6013:6094:46323:30388
9261	ribonucleotide catabolic process	13 out of 760 genes, 1.7%	18 out of 5417 background genes, 0.3%	3.89e-05	0	B9J08_000274:B9J08_000808:B9J08_001860:B9J08_001875:B9J08_002566:B9J08_003371:B9J08_003632:B9J08_003836:B9J08_004309:B9J08_004375:B9J08_004928:B9J08_005226:B9J08_005239	6006:32889:6002:6090:1990539:1678:2001234:6000:46015:6096:70072:7035:51453:42866:1901135:5975:61621:6013:6094:46323:30388
2181	cytoplasmic translation	25 out of 760 genes, 3.3%	61 out of 5417 background genes, 1.1%	0.00022	0	B9J08_000102:B9J08_000209:B9J08_000711:B9J08_000727:B9J08_000878:B9J08_000955:B9J08_001851:B9J08_001885:B9J08_001917:B9J08_001974:B9J08_002367:B9J08_002813:B9J08_003127:B9J08_003250:B9J08_003432:B9J08_003634:B9J08_003721:B9J08_003756:B9J08_003894:B9J08_004574:B9J08_004579:B9J08_004958:B9J08_004999:B9J08_005324:B9J08_005385	97010:45944:463:42254:1990145:6351:6366:2183:34599:6879:51083:447:2182:42149:6414:70651:6452:45903:6415:27:42274:1731:6450:2181:6412:42273:6407:448:16236:6413:6449:56:54:470:28:8033:6364:461
6195	purine nucleotide catabolic process	13 out of 760 genes, 1.7%	20 out of 5417 background genes, 0.4%	0.00026	0	B9J08_000274:B9J08_000808:B9J08_001860:B9J08_001875:B9J08_002566:B9J08_003371:B9J08_003632:B9J08_003836:B9J08_004309:B9J08_004375:B9J08_004928:B9J08_005226:B9J08_005239	6006:32889:6002:6090:1990539:1678:2001234:6000:46015:6096:70072:7035:51453:42866:1901135:5975:61621:6013:6094:46323:30388
72523	purine-containing compound catabolic process	15 out of 760 genes, 2.0%	26 out of 5417 background genes, 0.5%	0.00029	0	B9J08_000274:B9J08_000808:B9J08_001860:B9J08_001875:B9J08_002566:B9J08_003371:B9J08_003632:B9J08_003836:B9J08_003867:B9J08_004309:B9J08_004375:B9J08_004928:B9J08_005078:B9J08_005226:B9J08_005239	6006:32889:6002:43103:6090:1990539:1678:2001234:9115:6000:9168:46015:6096:70072:7035:51453:43101:42866:1901135:5975:61621:6013:6094:6146:46323:30388
6090	pyruvate metabolic process	14 out of 760 genes, 1.8%	23 out of 5417 background genes, 0.4%	0.00029	0	B9J08_000274:B9J08_000808:B9J08_001860:B9J08_001875:B9J08_002231:B9J08_002566:B9J08_003371:B9J08_003632:B9J08_003836:B9J08_004309:B9J08_004375:B9J08_004928:B9J08_005226:B9J08_005239	6006:32889:6002:6090:1990539:1678:2001234:6000:19655:46015:6096:6559:70072:7035:51453:42866:6569:1901135:5975:61621:6013:6094:949:46323:30388
55085	transmembrane transport	88 out of 760 genes, 11.6%	377 out of 5417 background genes, 7.0%	0.00037	0	B9J08_000002:CDR1:B9J08_000170:B9J08_000172:B9J08_000175:B9J08_000342:MDR2:B9J08_000434:B9J08_000449:B9J08_000483:B9J08_000756:B9J08_000796:B9J08_000853:B9J08_000995:B9J08_001017:B9J08_001070:B9J08_001162:B9J08_001464:B9J08_001523:B9J08_001530:B9J08_001567:B9J08_001673:B9J08_001856:B9J08_001998:B9J08_002006:B9J08_002079:B9J08_002080:B9J08_002239:B9J08_002241:B9J08_002242:B9J08_002243:B9J08_002251…	15798:9410:6006:6862:6843:55085:6458:72530:71805:1990547:15867:97080:101:35719:1990539:1903830:42026:6812:30643:51604:30001:15848:6616:1902047:6865:1678:6879:42391:45041:9060:15677:1904679:2001234:6888:1990573:34486:30150:6915:10509:770:6457:6000:1904263:6817:6828:35435:15742:71577:46015:6797:296:15856:6839:6096:98721:15720:19740:9061:71454:1903692:30476:8272:6816:51453:15886:43161:15883:1990544:…
9166	nucleotide catabolic process	13 out of 760 genes, 1.7%	21 out of 5417 background genes, 0.4%	0.00061	0	B9J08_000274:B9J08_000808:B9J08_001860:B9J08_001875:B9J08_002566:B9J08_003371:B9J08_003632:B9J08_003836:B9J08_004309:B9J08_004375:B9J08_004928:B9J08_005226:B9J08_005239	6006:32889:6002:6090:1990539:1678:2001234:6000:46015:6096:70072:7035:51453:42866:1901135:5975:61621:6013:6094:46323:30388
42255	ribosome assembly	22 out of 760 genes, 2.9%	55 out of 5417 background genes, 1.0%	0.00205	0	B9J08_000064:B9J08_000142:B9J08_000254:B9J08_000286:B9J08_000554:B9J08_000605:B9J08_000632:B9J08_000711:B9J08_000878:B9J08_001062:B9J08_001915:B9J08_002339:B9J08_002601:B9J08_002921:B9J08_003023:B9J08_003288:B9J08_004146:B9J08_004761:B9J08_004958:B9J08_005099:B9J08_005324:B9J08_005336	1902775:463:42254:1990145:1902626:447:16070:6415:1900153:27:42274:2109:30490:2181:6412:42273:6407:462:54:470:42255:28:6364:461
1901292	nucleoside phosphate catabolic process	13 out of 760 genes, 1.7%	23 out of 5417 background genes, 0.4%	0.00262	0	B9J08_000274:B9J08_000808:B9J08_001860:B9J08_001875:B9J08_002566:B9J08_003371:B9J08_003632:B9J08_003836:B9J08_004309:B9J08_004375:B9J08_004928:B9J08_005226:B9J08_005239	6006:32889:6002:6090:1990539:1678:2001234:6000:46015:6096:70072:7035:51453:42866:1901135:5975:61621:6013:6094:46323:30388
6006	glucose metabolic process	12 out of 760 genes, 1.6%	20 out of 5417 background genes, 0.4%	0.00276	0	B9J08_000808:B9J08_001860:B9J08_001875:B9J08_002231:B9J08_002566:B9J08_002669:B9J08_003306:B9J08_003632:B9J08_003836:B9J08_004375:B9J08_005226:B9J08_005239	6006:6090:1990539:1678:2001234:6000:19655:46015:6096:6559:42866:6569:1901135:5975:61621:6013:6094:949:46323
16052	carbohydrate catabolic process	15 out of 760 genes, 2.0%	32 out of 5417 background genes, 0.6%	0.00935	0	B9J08_000274:B9J08_000808:B9J08_001860:B9J08_001875:B9J08_002477:B9J08_002566:B9J08_003371:B9J08_003397:B9J08_003632:B9J08_003836:B9J08_004309:B9J08_004375:B9J08_004928:B9J08_005226:B9J08_005239	6006:32889:6002:71704:19255:6090:1990539:1678:2001234:5978:6011:6000:5992:46015:15771:6096:70072:7035:51453:5993:42866:30003:1901135:5975:61621:51156:6013:6094:46323:19388:30388:6874
1902292	cell cycle DNA replication initiation	9 out of 760 genes, 1.2%	14 out of 5417 background genes, 0.3%	0.02516	0	B9J08_001474:B9J08_001667:B9J08_001693:B9J08_002225:B9J08_003155:B9J08_003467:B9J08_003937:B9J08_005476:B9J08_005515	6974:6261:6279:6281:6325:30174:1905775:16233:727:42276:45004:6267:6302:51301:33314:6269:6297:6303:140530:6260:731:34080:33260:35822:140529:45005:7064:6270:32508:6284:1903468:82:1902983:31048:31573:6278:6271:7534:1902981:1903460:6272:45736:6268:1902975:1905634
1902315	nuclear cell cycle DNA replication initiation	9 out of 760 genes, 1.2%	14 out of 5417 background genes, 0.3%	0.02516	0	B9J08_001474:B9J08_001667:B9J08_001693:B9J08_002225:B9J08_003155:B9J08_003467:B9J08_003937:B9J08_005476:B9J08_005515	6974:6261:6279:6281:6325:30174:1905775:16233:727:42276:45004:6267:6302:51301:33314:6269:6297:6303:140530:6260:731:34080:33260:35822:140529:45005:7064:6270:32508:6284:1903468:82:1902983:31048:31573:6278:6271:7534:1902981:1903460:6272:45736:6268:1902975:1905634
19538	protein metabolic process	171 out of 760 genes, 22.5%	926 out of 5417 background genes, 17.1%	0.0252	0	B9J08_000064:B9J08_000090:B9J08_000091:B9J08_000102:B9J08_000107:B9J08_000136:B9J08_000142:B9J08_000185:B9J08_000203:B9J08_000209:B9J08_000217:B9J08_000254:B9J08_000290:B9J08_000346:B9J08_000425:B9J08_000445:B9J08_000458:B9J08_000461:B9J08_000483:B9J08_000554:B9J08_000604:B9J08_000605:B9J08_000632:B9J08_000645:B9J08_000711:B9J08_000727:B9J08_000771:B9J08_000822:B9J08_000878:B9J08_000915:B9J08_000…	32:1902660:97010:6974:60258:2000370:45944:921:55:1932:6281:463:43409:9272:1402:6458:42254:11:2000247:492:1903272:30950:45048:1990145:10731:7232:10972:226:43248:32220:6749:51229:35719:34975:46827:6511:71470:32995:38066:42276:7023:61157:42307:1902935:6351:6914:61092:6366:42026:1903753:2183:34599:30163:51604:10526:34517:31571:715:6616:71507:70146:70301:6508:6879:45041:70145:97248:51083:1903024:720:2…
9205	purine ribonucleoside triphosphate metabolic process	14 out of 760 genes, 1.8%	31 out of 5417 background genes, 0.6%	0.03208	0	B9J08_000274:B9J08_000808:B9J08_000816:B9J08_001860:B9J08_001875:B9J08_002566:B9J08_003371:B9J08_003632:B9J08_003836:B9J08_004309:B9J08_004375:B9J08_004928:B9J08_005226:B9J08_005239	6974:6006:32889:6002:6090:1990539:6228:1678:2001234:6000:6183:46015:6096:70072:7035:6241:51453:42866:1901135:5975:61621:6013:6094:46323:30388
42254	ribosome biogenesis	66 out of 760 genes, 8.7%	294 out of 5417 background genes, 5.4%	0.04808	0	B9J08_000064:B9J08_000082:B9J08_000091:B9J08_000102:B9J08_000107:B9J08_000120:B9J08_000142:B9J08_000185:B9J08_000203:B9J08_000233:B9J08_000254:B9J08_000286:B9J08_000554:B9J08_000605:B9J08_000632:B9J08_000711:B9J08_000771:B9J08_000878:B9J08_000910:B9J08_000998:B9J08_001062:B9J08_001087:B9J08_001278:B9J08_001674:B9J08_001803:B9J08_001870:B9J08_001915:B9J08_001922:B9J08_001974:B9J08_002135:B9J08_002…	55:1902775:463:42254:1990145:1902626:280:465:1901987:6508:51083:2000640:1901195:46822:447:480:42149:467:70651:6452:16070:45903:6415:1900153:472:6913:27:42274:2000765:6450:17148:2109:30490:2181:6412:48025:494:6606:42273:6407:448:6413:31167:462:6997:50821:56:54:470:42255:28:16973:8033:6364:34063:461
9199	ribonucleoside triphosphate metabolic process	14 out of 760 genes, 1.8%	32 out of 5417 background genes, 0.6%	0.04976	0	B9J08_000274:B9J08_000808:B9J08_000816:B9J08_001860:B9J08_001875:B9J08_002566:B9J08_003371:B9J08_003632:B9J08_003836:B9J08_004309:B9J08_004375:B9J08_004928:B9J08_005226:B9J08_005239	6974:6006:32889:6002:6090:1990539:6228:1678:2001234:6000:6183:46015:6096:70072:7035:6241:51453:42866:1901135:5975:61621:6013:6094:46323:30388
Molecular function
GOID	GO_term	Cluster frequency	Background frequency	Corrected P-value	False discovery rate	Gene(s) annotated to the term	Directly Annotated GOID List
3735	structural constituent of ribosome	99 out of 760 genes, 13.0%	149 out of 5417 background genes, 2.8%	8.18e-48	0	B9J08_000064:B9J08_000090:B9J08_000091:B9J08_000107:B9J08_000136:B9J08_000142:B9J08_000185:B9J08_000203:B9J08_000209:B9J08_000217:B9J08_000254:B9J08_000346:B9J08_000461:B9J08_000554:B9J08_000604:B9J08_000605:B9J08_000632:B9J08_000649:B9J08_000711:B9J08_000727:B9J08_000728:B9J08_000734:B9J08_000771:B9J08_000878:B9J08_000955:B9J08_000998:B9J08_001081:B9J08_001128:B9J08_001278:B9J08_001607:B9J08_001…	3906:3735:19843:3676:46872:30295:70181:3697:4784:3725:31386:3677:30627:70180:3723:8097:4525:150
5198	structural molecule activity	99 out of 760 genes, 13.0%	223 out of 5417 background genes, 4.1%	5.59e-27	0	B9J08_000064:B9J08_000090:B9J08_000091:B9J08_000107:B9J08_000136:B9J08_000142:B9J08_000185:B9J08_000203:B9J08_000209:B9J08_000217:B9J08_000254:B9J08_000346:B9J08_000461:B9J08_000554:B9J08_000604:B9J08_000605:B9J08_000632:B9J08_000649:B9J08_000711:B9J08_000727:B9J08_000728:B9J08_000734:B9J08_000771:B9J08_000878:B9J08_000955:B9J08_000998:B9J08_001081:B9J08_001128:B9J08_001278:B9J08_001607:B9J08_001…	3906:3735:19843:3676:46872:30295:70181:3697:4784:3725:31386:3677:30627:70180:3723:8097:4525:150
5215	transporter activity	87 out of 760 genes, 11.4%	397 out of 5417 background genes, 7.3%	0.00244	0	B9J08_000002:B9J08_000034:CDR1:B9J08_000170:B9J08_000172:B9J08_000175:MDR2:B9J08_000434:B9J08_000435:B9J08_000444:B9J08_000677:B9J08_000739:B9J08_000756:B9J08_000796:B9J08_000853:B9J08_000995:B9J08_001017:B9J08_001070:B9J08_001162:B9J08_001351:B9J08_001464:B9J08_001523:B9J08_001530:B9J08_001567:B9J08_001581:B9J08_001856:B9J08_001889:B9J08_001998:B9J08_002006:B9J08_002079:B9J08_002080:B9J08_002239…	5365:1901691:5375:15440:102:140351:15131:15203:1901604:297:8320:15116:15606:46873:5215:5452:4129:15297:15075:35673:140318:90555:287:97079:15225:8324:15079:80139:5384:5524:5381:140346:22890:5274:140107:140359:89721:22857:20037:42626:8271:42910:8525:30943:166:15212:8553:15379:8559:8519:15244:15562:15174:3677:140326:140345:15565:16887:15210:5385:15377:5471:1901239:15232:5315:8526:1990050:15295:51082…
22857	transmembrane transporter activity	81 out of 760 genes, 10.7%	366 out of 5417 background genes, 6.8%	0.00355	0	B9J08_000002:B9J08_000034:CDR1:B9J08_000170:B9J08_000172:B9J08_000175:MDR2:B9J08_000434:B9J08_000677:B9J08_000739:B9J08_000756:B9J08_000796:B9J08_000853:B9J08_000995:B9J08_001017:B9J08_001070:B9J08_001162:B9J08_001351:B9J08_001464:B9J08_001523:B9J08_001530:B9J08_001567:B9J08_001856:B9J08_001889:B9J08_001998:B9J08_002006:B9J08_002079:B9J08_002080:B9J08_002239:B9J08_002241:B9J08_002243:B9J08_002251…	5365:1901691:5375:15440:102:15131:15203:1901604:297:8320:15116:15606:46873:5215:5452:4129:15297:15075:35673:97079:15225:8324:15079:80139:5384:5524:5381:22890:5274:140107:140359:89721:22857:20037:8271:42626:42910:30943:166:8553:15212:15379:8519:8559:15244:15562:15174:3677:15565:16887:15210:5385:15377:5471:1901239:15232:5315:15295:15205:15230:5371:5476:5388:15095:34658:15103:5310
16491	oxidoreductase activity	72 out of 760 genes, 9.5%	317 out of 5417 background genes, 5.9%	0.00452	0	B9J08_000008:B9J08_000075:B9J08_000144:B9J08_000169:B9J08_000229:B9J08_000261:B9J08_000418:B9J08_000465:B9J08_000645:B9J08_000701:B9J08_000740:B9J08_000850:B9J08_000920:B9J08_001135:B9J08_001161:B9J08_001171:B9J08_001224:B9J08_001281:B9J08_001351:B9J08_001365:B9J08_001450:B9J08_001535:B9J08_001571:B9J08_001744:B9J08_001759:B9J08_001863:B9J08_002245:B9J08_002366:B9J08_002408:B9J08_002427:B9J08_002…	3779:4152:170:51536:3735:43022:16652:3955:42284:31418:5506:51287:71949:8270:5507:47018:8198:16653:140311:4107:4506:3868:16491:16972:16730:51990:3854:3690:16620:19826:8379:97641:4129:31543:51920:32542:287:46872:4784:16709:4488:4109:3938:140824:48038:5524:16668:4128:16966:4362:20037:293:3842:50660:46592:4392:4601:3958:4329:16628:3884:51063:8131:16639:47012:166:16616:50661:47019:4748:3756:16712:1913…
Cellular component
GOID	GO_term	Cluster frequency	Background frequency	Corrected P-value	False discovery rate	Gene(s) annotated to the term	Directly Annotated GOID List
5840	ribosome	107 out of 760 genes, 14.1%	182 out of 5417 background genes, 3.4%	1.62e-44	0	B9J08_000064:B9J08_000090:B9J08_000091:B9J08_000107:B9J08_000136:B9J08_000142:B9J08_000185:B9J08_000203:B9J08_000209:B9J08_000217:B9J08_000254:B9J08_000346:B9J08_000461:B9J08_000554:B9J08_000604:B9J08_000605:B9J08_000632:B9J08_000649:B9J08_000711:B9J08_000727:B9J08_000728:B9J08_000734:B9J08_000771:B9J08_000774:B9J08_000878:B9J08_000955:B9J08_000998:B9J08_001081:B9J08_001087:B9J08_001128:B9J08_001…	5737:5763:5829:32040:5840:5739:5736:42645:101031:5762:30687:15934:71014:30688:5730:22625:5634:1990904:22626:30686:22627:15935:10494
44391	ribosomal subunit	89 out of 760 genes, 11.7%	144 out of 5417 background genes, 2.7%	4.45e-39	0	B9J08_000064:B9J08_000090:B9J08_000091:B9J08_000107:B9J08_000136:B9J08_000203:B9J08_000209:B9J08_000217:B9J08_000346:B9J08_000554:B9J08_000632:B9J08_000649:B9J08_000711:B9J08_000727:B9J08_000728:B9J08_000734:B9J08_000771:B9J08_000878:B9J08_000955:B9J08_000998:B9J08_001081:B9J08_001087:B9J08_001128:B9J08_001278:B9J08_001607:B9J08_001708:B9J08_001744:B9J08_001851:B9J08_001870:B9J08_001885:B9J08_001…	5737:5763:5829:32040:5840:5739:5736:42645:101031:5762:30687:15934:30688:5730:5634:22625:1990904:22627:15935
22626	cytosolic ribosome	60 out of 760 genes, 7.9%	81 out of 5417 background genes, 1.5%	1.41e-32	0	B9J08_000064:B9J08_000090:B9J08_000091:B9J08_000107:B9J08_000136:B9J08_000203:B9J08_000209:B9J08_000346:B9J08_000554:B9J08_000632:B9J08_000711:B9J08_000727:B9J08_000771:B9J08_000878:B9J08_000955:B9J08_000998:B9J08_001081:B9J08_001278:B9J08_001851:B9J08_001870:B9J08_001885:B9J08_001922:B9J08_001974:B9J08_002277:B9J08_002367:B9J08_002601:B9J08_002718:B9J08_002719:B9J08_002722:B9J08_002813:B9J08_002…	5737:5829:32040:5840:5736:30687:15934:30688:5730:5634:22625:1990904:22626:22627:10494:15935
22625	cytosolic large ribosomal subunit	40 out of 760 genes, 5.3%	43 out of 5417 background genes, 0.8%	5.55e-29	0	B9J08_000064:B9J08_000090:B9J08_000136:B9J08_000209:B9J08_000346:B9J08_000554:B9J08_000711:B9J08_000727:B9J08_000878:B9J08_000955:B9J08_001081:B9J08_001278:B9J08_001851:B9J08_001885:B9J08_001922:B9J08_002277:B9J08_002367:B9J08_002601:B9J08_002718:B9J08_002719:B9J08_003023:B9J08_003127:B9J08_003249:B9J08_003250:B9J08_003313:B9J08_003393:B9J08_003634:B9J08_003756:B9J08_003919:B9J08_003953:B9J08_004…	5737:5829:5840:5736:30687:15934:5730:5634:22625:1990904
15934	large ribosomal subunit	59 out of 760 genes, 7.8%	89 out of 5417 background genes, 1.6%	1.01e-27	0	B9J08_000064:B9J08_000090:B9J08_000136:B9J08_000209:B9J08_000217:B9J08_000346:B9J08_000554:B9J08_000711:B9J08_000727:B9J08_000728:B9J08_000734:B9J08_000878:B9J08_000955:B9J08_001081:B9J08_001087:B9J08_001128:B9J08_001278:B9J08_001607:B9J08_001708:B9J08_001851:B9J08_001885:B9J08_001922:B9J08_002277:B9J08_002367:B9J08_002601:B9J08_002693:B9J08_002718:B9J08_002719:B9J08_002779:B9J08_002786:B9J08_003…	5737:5829:5840:5739:5736:42645:101031:5762:30687:15934:5730:5634:22625:1990904
1990904	ribonucleoprotein complex	120 out of 760 genes, 15.8%	387 out of 5417 background genes, 7.1%	6.04e-17	0	B9J08_000064:B9J08_000090:B9J08_000091:B9J08_000107:B9J08_000120:B9J08_000136:B9J08_000142:B9J08_000185:B9J08_000203:B9J08_000209:B9J08_000217:B9J08_000233:B9J08_000286:B9J08_000333:B9J08_000346:B9J08_000554:B9J08_000605:B9J08_000632:B9J08_000649:B9J08_000711:B9J08_000727:B9J08_000728:B9J08_000734:B9J08_000771:B9J08_000774:B9J08_000878:B9J08_000910:B9J08_000955:B9J08_000998:B9J08_001081:B9J08_001…	42175:5763:5956:5655:33290:5654:32040:30692:42645:71541:101031:5762:5759:71540:30687:15934:16282:22625:46540:172:30686:71004:22627:15935:5686:5737:5829:5758:5840:5739:5783:5736:43614:34456:34388:70545:5852:71014:30688:31428:5730:5634:1990904:5850:10494:34399:30690
15935	small ribosomal subunit	30 out of 760 genes, 3.9%	55 out of 5417 background genes, 1.0%	3.17e-10	0	B9J08_000091:B9J08_000107:B9J08_000203:B9J08_000632:B9J08_000649:B9J08_000771:B9J08_000998:B9J08_001744:B9J08_001870:B9J08_001974:B9J08_002921:B9J08_002934:B9J08_002947:B9J08_002961:B9J08_003288:B9J08_003384:B9J08_003530:B9J08_003560:B9J08_003677:B9J08_003755:B9J08_003935:B9J08_003975:B9J08_004067:B9J08_004595:B9J08_004761:B9J08_004990:B9J08_005012:B9J08_005324:B9J08_005362:B9J08_005458	5763:32040:22627:15935:5737:5840:5739:30688:5730:5634
5829	cytosol	97 out of 760 genes, 12.8%	364 out of 5417 background genes, 6.7%	7.72e-09	0	B9J08_000064:B9J08_000090:B9J08_000091:B9J08_000102:B9J08_000107:B9J08_000136:B9J08_000203:B9J08_000209:B9J08_000229:B9J08_000274:B9J08_000346:B9J08_000444:B9J08_000446:B9J08_000554:B9J08_000632:B9J08_000645:B9J08_000686:B9J08_000711:B9J08_000727:CAS5:B9J08_000771:B9J08_000816:B9J08_000878:B9J08_000955:B9J08_000998:B9J08_001081:B9J08_001161:B9J08_001205:B9J08_001269:B9J08_001278:B9J08_001851:B9J0…	140453:5628:139:32040:324:31966:51286:785:329:5759:30687:15934:31261:5945:32153:22625:5971:35861:22627:15935:5737:31298:5829:5758:5840:5777:5739:5736:5794:5657:9277:30688:5933:16020:5730:5634:15:1990904:22626:10494:1904564:43596
22627	cytosolic small ribosomal subunit	17 out of 760 genes, 2.2%	23 out of 5417 background genes, 0.4%	2.62e-08	0	B9J08_000091:B9J08_000107:B9J08_000203:B9J08_000632:B9J08_000771:B9J08_000998:B9J08_001870:B9J08_001974:B9J08_002921:B9J08_002961:B9J08_003288:B9J08_003677:B9J08_004067:B9J08_004761:B9J08_004990:B9J08_005324:B9J08_005458	32040:22627:15935:5737:5840:30688:5730:5634
313	organellar ribosome	30 out of 760 genes, 3.9%	78 out of 5417 background genes, 1.4%	1.39e-05	0	B9J08_000217:B9J08_000649:B9J08_000728:B9J08_000734:B9J08_001128:B9J08_001607:B9J08_001708:B9J08_001744:B9J08_002693:B9J08_002779:B9J08_002786:B9J08_002934:B9J08_002947:B9J08_003274:B9J08_003384:B9J08_003530:B9J08_003560:B9J08_003596:B9J08_003605:B9J08_003711:B9J08_003930:B9J08_003935:B9J08_003975:B9J08_004085:B9J08_004269:B9J08_004595:B9J08_004835:B9J08_005012:B9J08_005046:B9J08_005362	5763:42645:5762:15934:15935:5840:5739:5634
5761	mitochondrial ribosome	30 out of 760 genes, 3.9%	78 out of 5417 background genes, 1.4%	1.39e-05	0	B9J08_000217:B9J08_000649:B9J08_000728:B9J08_000734:B9J08_001128:B9J08_001607:B9J08_001708:B9J08_001744:B9J08_002693:B9J08_002779:B9J08_002786:B9J08_002934:B9J08_002947:B9J08_003274:B9J08_003384:B9J08_003530:B9J08_003560:B9J08_003596:B9J08_003605:B9J08_003711:B9J08_003930:B9J08_003935:B9J08_003975:B9J08_004085:B9J08_004269:B9J08_004595:B9J08_004835:B9J08_005012:B9J08_005046:B9J08_005362	5763:42645:5762:15934:15935:5840:5739:5634
315	organellar large ribosomal subunit	18 out of 760 genes, 2.4%	44 out of 5417 background genes, 0.8%	0.00228	0	B9J08_000217:B9J08_000728:B9J08_000734:B9J08_001128:B9J08_001607:B9J08_001708:B9J08_002693:B9J08_002779:B9J08_002786:B9J08_003274:B9J08_003596:B9J08_003605:B9J08_003711:B9J08_003930:B9J08_004085:B9J08_004269:B9J08_004835:B9J08_005046	42645:5762:15934:5840:5739:5634
5762	mitochondrial large ribosomal subunit	18 out of 760 genes, 2.4%	44 out of 5417 background genes, 0.8%	0.00228	0	B9J08_000217:B9J08_000728:B9J08_000734:B9J08_001128:B9J08_001607:B9J08_001708:B9J08_002693:B9J08_002779:B9J08_002786:B9J08_003274:B9J08_003596:B9J08_003605:B9J08_003711:B9J08_003930:B9J08_004085:B9J08_004269:B9J08_004835:B9J08_005046	42645:5762:15934:5840:5739:5634
Species	Platform:	Type of genes	Criteria	Number of genes
C. auris	FungiDB	upregulated	DEG; FC>1.5	760
Biological process
ID	Name	Bgd count	Result count	Result gene list	Pct of bgd	Fold enrichment	Odds ratio	P-value	Benjamini	Bonferroni
GO:0006412	translation	251	111	B9J08_000064,B9J08_000090,B9J08_000091,B9J08_000102,B9J08_000107,B9J08_000136,B9J08_000142,B9J08_000185,B9J08_000203,B9J08_000209,B9J08_000217,B9J08_000254,B9J08_000346,B9J08_000461,B9J08_000554,B9J08_000604,B9J08_000605,B9J08_000632,B9J08_000711,B9J08_000727,B9J08_000728,B9J08_000771,B9J08_000878,B9J08_000955,B9J08_000975,B9J08_000998,B9J08_001081,B9J08_001128,B9J08_001278,B9J08_001561,B9J08_001…	44.2	3.17	5.7	1.15984e-33	1.49904e-30	2.80914e-30
GO:0043043	peptide biosynthetic process	255	112	B9J08_000064,B9J08_000090,B9J08_000091,B9J08_000102,B9J08_000107,B9J08_000136,B9J08_000142,B9J08_000185,B9J08_000203,B9J08_000209,B9J08_000217,B9J08_000254,B9J08_000346,B9J08_000461,B9J08_000554,B9J08_000604,B9J08_000605,B9J08_000632,B9J08_000711,B9J08_000727,B9J08_000728,B9J08_000771,B9J08_000878,B9J08_000955,B9J08_000975,B9J08_000998,B9J08_001081,B9J08_001128,B9J08_001278,B9J08_001561,B9J08_001…	43.9	3.15	5.63	1.23785e-33	1.49904e-30	2.99808e-30
GO:0006518	peptide metabolic process	276	113	B9J08_000064,B9J08_000090,B9J08_000091,B9J08_000102,B9J08_000107,B9J08_000136,B9J08_000142,B9J08_000185,B9J08_000203,B9J08_000209,B9J08_000217,B9J08_000254,B9J08_000346,B9J08_000461,B9J08_000554,B9J08_000604,B9J08_000605,B9J08_000632,B9J08_000711,B9J08_000727,B9J08_000728,B9J08_000771,B9J08_000878,B9J08_000955,B9J08_000975,B9J08_000998,B9J08_001081,B9J08_001128,B9J08_001278,B9J08_001561,B9J08_001…	40.9	2.94	4.97	1.62769e-30	1.31409e-27	3.94227e-27
GO:0043604	amide biosynthetic process	291	114	B9J08_000064,B9J08_000090,B9J08_000091,B9J08_000102,B9J08_000107,B9J08_000136,B9J08_000142,B9J08_000185,B9J08_000203,B9J08_000209,B9J08_000217,B9J08_000254,B9J08_000346,B9J08_000458,B9J08_000461,B9J08_000554,B9J08_000604,B9J08_000605,B9J08_000632,B9J08_000711,B9J08_000727,B9J08_000728,B9J08_000771,B9J08_000878,B9J08_000955,B9J08_000975,B9J08_000998,B9J08_001081,B9J08_001128,B9J08_001278,B9J08_001…	39.2	2.81	4.61	1.03236e-28	6.25091e-26	2.50037e-25
GO:0043603	cellular amide metabolic process	338	118	B9J08_000064,B9J08_000090,B9J08_000091,B9J08_000102,B9J08_000107,B9J08_000136,B9J08_000142,B9J08_000185,B9J08_000203,B9J08_000209,B9J08_000217,B9J08_000254,B9J08_000346,B9J08_000458,B9J08_000461,B9J08_000554,B9J08_000604,B9J08_000605,B9J08_000632,B9J08_000711,B9J08_000727,B9J08_000728,B9J08_000756,B9J08_000771,B9J08_000878,B9J08_000955,B9J08_000975,B9J08_000998,B9J08_001081,B9J08_001128,B9J08_001…	34.9	2.51	3.82	1.87417e-24	9.07848e-22	4.53924e-21
GO:1901566	organonitrogen compound biosynthetic process	672	176	B9J08_000013,B9J08_000058,B9J08_000064,B9J08_000075,B9J08_000090,B9J08_000091,B9J08_000102,B9J08_000107,B9J08_000136,B9J08_000142,B9J08_000174,B9J08_000185,B9J08_000203,B9J08_000209,B9J08_000217,B9J08_000229,B9J08_000254,B9J08_000346,B9J08_000458,B9J08_000461,B9J08_000465,B9J08_000554,B9J08_000604,B9J08_000605,B9J08_000632,B9J08_000668,B9J08_000686,B9J08_000711,B9J08_000727,B9J08_000728,B9J08_000…	26.2	1.88	2.63	2.86987e-20	1.15847e-17	6.95082e-17
GO:0009058	biosynthetic process	1196	244	B9J08_000013,B9J08_000049,B9J08_000058,B9J08_000064,B9J08_000075,B9J08_000090,B9J08_000091,B9J08_000102,B9J08_000107,B9J08_000136,B9J08_000142,B9J08_000174,B9J08_000185,B9J08_000203,B9J08_000209,B9J08_000217,B9J08_000229,B9J08_000254,B9J08_000261,B9J08_000346,B9J08_000458,B9J08_000461,B9J08_000465,B9J08_000554,B9J08_000604,B9J08_000605,B9J08_000632,B9J08_000668,B9J08_000686,B9J08_000711,B9J08_000…	20.4	1.46	1.93	3.08151e-13	1.0662e-10	7.46341e-10
GO:1901576	organic substance biosynthetic process	1172	239	B9J08_000013,B9J08_000049,B9J08_000058,B9J08_000064,B9J08_000075,B9J08_000090,B9J08_000091,B9J08_000102,B9J08_000107,B9J08_000136,B9J08_000142,B9J08_000174,B9J08_000185,B9J08_000203,B9J08_000209,B9J08_000217,B9J08_000229,B9J08_000254,B9J08_000261,B9J08_000346,B9J08_000458,B9J08_000461,B9J08_000465,B9J08_000554,B9J08_000604,B9J08_000605,B9J08_000632,B9J08_000668,B9J08_000686,B9J08_000711,B9J08_000…	20.4	1.46	1.92	6.93559e-13	2.09975e-10	1.6798e-09
GO:0009059	macromolecule biosynthetic process	739	167	B9J08_000049,B9J08_000064,B9J08_000090,B9J08_000091,B9J08_000102,B9J08_000107,B9J08_000136,B9J08_000142,B9J08_000185,B9J08_000203,B9J08_000209,B9J08_000217,B9J08_000254,B9J08_000346,B9J08_000461,B9J08_000554,B9J08_000604,B9J08_000605,B9J08_000632,B9J08_000711,B9J08_000727,B9J08_000728,B9J08_000771,B9J08_000784,B9J08_000878,B9J08_000922,B9J08_000955,B9J08_000964,B9J08_000975,B9J08_000997,B9J08_000…	22.6	1.62	2.08	1.64574e-12	4.29386e-10	3.98597e-09
GO:0034645	cellular macromolecule biosynthetic process	722	164	B9J08_000049,B9J08_000064,B9J08_000090,B9J08_000091,B9J08_000102,B9J08_000107,B9J08_000136,B9J08_000142,B9J08_000185,B9J08_000203,B9J08_000209,B9J08_000217,B9J08_000254,B9J08_000346,B9J08_000461,B9J08_000554,B9J08_000604,B9J08_000605,B9J08_000632,B9J08_000711,B9J08_000727,B9J08_000728,B9J08_000771,B9J08_000784,B9J08_000878,B9J08_000922,B9J08_000955,B9J08_000964,B9J08_000975,B9J08_000997,B9J08_000…	22.7	1.63	2.09	1.77286e-12	4.29386e-10	4.29386e-09
GO:0044249	cellular biosynthetic process	1145	231	B9J08_000013,B9J08_000049,B9J08_000058,B9J08_000064,B9J08_000075,B9J08_000090,B9J08_000091,B9J08_000102,B9J08_000107,B9J08_000136,B9J08_000142,B9J08_000174,B9J08_000185,B9J08_000203,B9J08_000209,B9J08_000217,B9J08_000229,B9J08_000254,B9J08_000261,B9J08_000346,B9J08_000458,B9J08_000461,B9J08_000465,B9J08_000554,B9J08_000604,B9J08_000605,B9J08_000632,B9J08_000668,B9J08_000686,B9J08_000711,B9J08_000…	20.2	1.45	1.87	7.86341e-12	1.73138e-09	1.90452e-08
GO:0009132	nucleoside diphosphate metabolic process	25	18	B9J08_000274,B9J08_000808,B9J08_000816,B9J08_001345,B9J08_001860,B9J08_001875,B9J08_002566,B9J08_003306,B9J08_003371,B9J08_003632,B9J08_003836,B9J08_004309,B9J08_004375,B9J08_004601,B9J08_004928,B9J08_004965,B9J08_005226,B9J08_005239,	72	5.17	16.31	5.83821e-11	1.17835e-08	1.41402e-07
GO:0044271	cellular nitrogen compound biosynthetic process	694	154	B9J08_000058,B9J08_000064,B9J08_000075,B9J08_000090,B9J08_000091,B9J08_000102,B9J08_000107,B9J08_000136,B9J08_000142,B9J08_000185,B9J08_000203,B9J08_000209,B9J08_000217,B9J08_000254,B9J08_000346,B9J08_000458,B9J08_000461,B9J08_000554,B9J08_000604,B9J08_000605,B9J08_000632,B9J08_000668,B9J08_000711,B9J08_000727,B9J08_000728,B9J08_000771,B9J08_000816,B9J08_000878,B9J08_000955,B9J08_000975,B9J08_000…	22.2	1.59	2	7.8931e-11	1.47054e-08	1.91171e-07
GO:0009185	ribonucleoside diphosphate metabolic process	23	17	B9J08_000274,B9J08_000808,B9J08_001345,B9J08_001860,B9J08_001875,B9J08_002566,B9J08_003306,B9J08_003371,B9J08_003632,B9J08_003836,B9J08_004309,B9J08_004375,B9J08_004601,B9J08_004928,B9J08_004965,B9J08_005226,B9J08_005239,	73.9	5.31	17.95	1.03494e-10	1.79045e-08	2.50663e-07
GO:0046939	nucleotide phosphorylation	24	17	B9J08_000274,B9J08_000808,B9J08_000816,B9J08_001344,B9J08_001345,B9J08_001860,B9J08_001875,B9J08_002566,B9J08_003306,B9J08_003371,B9J08_003632,B9J08_003836,B9J08_004309,B9J08_004375,B9J08_004928,B9J08_005226,B9J08_005239,	70.8	5.08	15.38	3.09276e-10	4.99377e-08	7.49066e-07
GO:0046031	ADP metabolic process	20	15	B9J08_000274,B9J08_000808,B9J08_001345,B9J08_001860,B9J08_001875,B9J08_002566,B9J08_003306,B9J08_003371,B9J08_003632,B9J08_003836,B9J08_004309,B9J08_004375,B9J08_004928,B9J08_005226,B9J08_005239,	75	5.38	18.95	9.82995e-10	1.40048e-07	2.38081e-06
GO:0006165	nucleoside diphosphate phosphorylation	20	15	B9J08_000274,B9J08_000808,B9J08_000816,B9J08_001860,B9J08_001875,B9J08_002566,B9J08_003306,B9J08_003371,B9J08_003632,B9J08_003836,B9J08_004309,B9J08_004375,B9J08_004928,B9J08_005226,B9J08_005239,	75	5.38	18.95	9.82995e-10	1.40048e-07	2.38081e-06
GO:0006757	ATP generation from ADP	18	14	B9J08_000274,B9J08_000808,B9J08_001860,B9J08_001875,B9J08_002566,B9J08_003306,B9J08_003371,B9J08_003632,B9J08_003836,B9J08_004309,B9J08_004375,B9J08_004928,B9J08_005226,B9J08_005239,	77.8	5.58	22.08	1.62991e-09	2.07771e-07	3.94764e-06
GO:0006096	glycolytic process	18	14	B9J08_000274,B9J08_000808,B9J08_001860,B9J08_001875,B9J08_002566,B9J08_003306,B9J08_003371,B9J08_003632,B9J08_003836,B9J08_004309,B9J08_004375,B9J08_004928,B9J08_005226,B9J08_005239,	77.8	5.58	22.08	1.62991e-09	2.07771e-07	3.94764e-06
GO:0009179	purine ribonucleoside diphosphate metabolic process	21	15	B9J08_000274,B9J08_000808,B9J08_001345,B9J08_001860,B9J08_001875,B9J08_002566,B9J08_003306,B9J08_003371,B9J08_003632,B9J08_003836,B9J08_004309,B9J08_004375,B9J08_004928,B9J08_005226,B9J08_005239,	71.4	5.13	15.78	3.00092e-09	3.46106e-07	7.26823e-06
GO:0009135	purine nucleoside diphosphate metabolic process	21	15	B9J08_000274,B9J08_000808,B9J08_001345,B9J08_001860,B9J08_001875,B9J08_002566,B9J08_003306,B9J08_003371,B9J08_003632,B9J08_003836,B9J08_004309,B9J08_004375,B9J08_004928,B9J08_005226,B9J08_005239,	71.4	5.13	15.78	3.00092e-09	3.46106e-07	7.26823e-06
GO:0055114	obsolete oxidation-reduction process	245	67	B9J08_000008,B9J08_000075,B9J08_000144,B9J08_000169,B9J08_000229,B9J08_000261,B9J08_000418,B9J08_000645,B9J08_000701,B9J08_000740,B9J08_000850,B9J08_000920,B9J08_001161,B9J08_001171,B9J08_001224,B9J08_001281,B9J08_001365,B9J08_001450,B9J08_001535,B9J08_001571,B9J08_001744,B9J08_001759,B9J08_001863,B9J08_002245,B9J08_002366,B9J08_002408,B9J08_002419,B9J08_002427,B9J08_002531,B9J08_002536,B9J08_002…	27.3	1.96	2.48	1.04937e-08	1.15526e-06	2.54157e-05
GO:0006407	rRNA export from nucleus	11	10	B9J08_000091,B9J08_000142,B9J08_001974,B9J08_003107,B9J08_003273,B9J08_003288,B9J08_003755,B9J08_004067,B9J08_004990,B9J08_005324,	90.9	6.53	62.73	2.4974e-08	2.52029e-06	6.0487e-05
GO:0051029	rRNA transport	11	10	B9J08_000091,B9J08_000142,B9J08_001974,B9J08_003107,B9J08_003273,B9J08_003288,B9J08_003755,B9J08_004067,B9J08_004990,B9J08_005324,	90.9	6.53	62.73	2.4974e-08	2.52029e-06	6.0487e-05
GO:0006090	pyruvate metabolic process	25	15	B9J08_000274,B9J08_000808,B9J08_001860,B9J08_001875,B9J08_002231,B9J08_002566,B9J08_003306,B9J08_003371,B9J08_003632,B9J08_003836,B9J08_004309,B9J08_004375,B9J08_004928,B9J08_005226,B9J08_005239,	60	4.31	9.46	1.04699e-07	1.01433e-05	0.000253582
GO:0002181	cytoplasmic translation	60	24	B9J08_000102,B9J08_000209,B9J08_000711,B9J08_000727,B9J08_000878,B9J08_000955,B9J08_001851,B9J08_001877,B9J08_001885,B9J08_001917,B9J08_002367,B9J08_003127,B9J08_003250,B9J08_003432,B9J08_003634,B9J08_003721,B9J08_003756,B9J08_003894,B9J08_004574,B9J08_004579,B9J08_004958,B9J08_004999,B9J08_005324,B9J08_005385,	40	2.87	4.24	4.86721e-07	4.534e-05	0.00117884
GO:0055085	transmembrane transport	381	86	B9J08_000002,B9J08_000164,B9J08_000170,B9J08_000172,B9J08_000175,B9J08_000342,B9J08_000368,B9J08_000434,B9J08_000449,B9J08_000483,B9J08_000756,B9J08_000796,B9J08_000853,B9J08_000995,B9J08_001017,B9J08_001070,B9J08_001162,B9J08_001464,B9J08_001523,B9J08_001530,B9J08_001567,B9J08_001673,B9J08_001856,B9J08_001998,B9J08_002006,B9J08_002079,B9J08_002080,B9J08_002239,B9J08_002242,B9J08_002243,B9J08_002…	22.6	1.62	1.92	1.23259e-06	0.000110568	0.00298533
GO:1901564	organonitrogen compound metabolic process	1452	255	B9J08_000013,B9J08_000058,B9J08_000064,B9J08_000075,B9J08_000090,B9J08_000091,B9J08_000102,B9J08_000107,B9J08_000136,B9J08_000142,B9J08_000174,B9J08_000185,B9J08_000203,B9J08_000209,B9J08_000217,B9J08_000229,B9J08_000254,B9J08_000274,B9J08_000290,B9J08_000346,B9J08_000445,B9J08_000446,B9J08_000458,B9J08_000461,B9J08_000465,B9J08_000554,B9J08_000604,B9J08_000605,B9J08_000632,B9J08_000668,B9J08_000…	17.6	1.26	1.52	1.3776e-06	0.000119162	0.00333654
GO:0034641	cellular nitrogen compound metabolic process	1428	251	B9J08_000058,B9J08_000064,B9J08_000075,B9J08_000082,B9J08_000090,B9J08_000091,B9J08_000102,B9J08_000107,B9J08_000120,B9J08_000136,B9J08_000142,B9J08_000185,B9J08_000203,B9J08_000209,B9J08_000217,B9J08_000233,B9J08_000238,B9J08_000254,B9J08_000274,B9J08_000333,B9J08_000346,B9J08_000425,B9J08_000446,B9J08_000447,B9J08_000458,B9J08_000461,B9J08_000554,B9J08_000604,B9J08_000605,B9J08_000632,B9J08_000…	17.6	1.26	1.52	1.66897e-06	0.000139388	0.00404225
GO:0006006	glucose metabolic process	17	11	B9J08_000808,B9J08_001860,B9J08_001875,B9J08_002566,B9J08_002669,B9J08_003306,B9J08_003632,B9J08_003836,B9J08_004375,B9J08_005226,B9J08_005239,	64.7	4.64	11.5	1.97325e-06	0.000159307	0.00477921
GO:0006414	translational elongation	23	12	B9J08_000102,B9J08_000209,B9J08_000711,B9J08_001917,B9J08_002813,B9J08_003238,B9J08_003250,B9J08_003721,B9J08_003756,B9J08_004579,B9J08_004999,B9J08_005387,	52.2	3.74	6.85	1.50309e-05	0.00117435	0.0364049
GO:0042255	ribosome assembly	48	18	B9J08_000064,B9J08_000142,B9J08_000254,B9J08_000286,B9J08_000554,B9J08_000605,B9J08_000632,B9J08_000711,B9J08_001062,B9J08_002339,B9J08_002601,B9J08_002921,B9J08_003023,B9J08_003288,B9J08_004958,B9J08_005099,B9J08_005324,B9J08_005336,	37.5	2.69	3.78	3.78345e-05	0.0028636	0.0916352
GO:0019318	hexose metabolic process	25	12	B9J08_000808,B9J08_001860,B9J08_001875,B9J08_002477,B9J08_002566,B9J08_002669,B9J08_003306,B9J08_003632,B9J08_003836,B9J08_004375,B9J08_005226,B9J08_005239,	48	3.45	5.79	4.42156e-05	0.0031506	0.10709
GO:0042254	ribosome biogenesis	292	65	B9J08_000064,B9J08_000082,B9J08_000091,B9J08_000102,B9J08_000107,B9J08_000120,B9J08_000142,B9J08_000185,B9J08_000203,B9J08_000233,B9J08_000254,B9J08_000286,B9J08_000554,B9J08_000605,B9J08_000632,B9J08_000711,B9J08_000771,B9J08_000910,B9J08_000998,B9J08_001062,B9J08_001087,B9J08_001674,B9J08_001803,B9J08_001870,B9J08_001915,B9J08_001922,B9J08_001974,B9J08_002135,B9J08_002233,B9J08_002277,B9J08_002…	22.3	1.6	1.85	4.4228e-05	0.0031506	0.10712
GO:0016052	carbohydrate catabolic process	46	17	B9J08_000274,B9J08_000808,B9J08_001860,B9J08_001875,B9J08_002477,B9J08_002566,B9J08_003306,B9J08_003371,B9J08_003397,B9J08_003632,B9J08_003836,B9J08_004309,B9J08_004375,B9J08_004380,B9J08_004928,B9J08_005226,B9J08_005239,	37	2.65	3.69	7.70619e-05	0.00533269	0.186644
GO:0005996	monosaccharide metabolic process	29	12	B9J08_000808,B9J08_001860,B9J08_001875,B9J08_002477,B9J08_002566,B9J08_002669,B9J08_003306,B9J08_003632,B9J08_003836,B9J08_004375,B9J08_005226,B9J08_005239,	41.4	2.97	4.42	0.000258514	0.0173922	0.626121
GO:0006094	gluconeogenesis	9	6	B9J08_000808,B9J08_001860,B9J08_001875,B9J08_002669,B9J08_004375,B9J08_005239,	66.7	4.79	12.46	0.000412896	0.0270279	1
GO:0022613	ribonucleoprotein complex biogenesis	357	71	B9J08_000064,B9J08_000082,B9J08_000091,B9J08_000102,B9J08_000107,B9J08_000120,B9J08_000142,B9J08_000185,B9J08_000203,B9J08_000233,B9J08_000254,B9J08_000286,B9J08_000333,B9J08_000554,B9J08_000605,B9J08_000632,B9J08_000711,B9J08_000771,B9J08_000910,B9J08_000998,B9J08_001062,B9J08_001087,B9J08_001674,B9J08_001803,B9J08_001870,B9J08_001877,B9J08_001915,B9J08_001922,B9J08_001974,B9J08_002135,B9J08_002…	19.9	1.43	1.6	0.000768646	0.0489911	1
GO:0019319	hexose biosynthetic process	10	6	B9J08_000808,B9J08_001860,B9J08_001875,B9J08_002669,B9J08_004375,B9J08_005239,	60	4.31	9.34	0.00091094	0.0541776	1
GO:0046364	monosaccharide biosynthetic process	10	6	B9J08_000808,B9J08_001860,B9J08_001875,B9J08_002669,B9J08_004375,B9J08_005239,	60	4.31	9.34	0.00091094	0.0541776	1
GO:0006082	organic acid metabolic process	347	69	B9J08_000013,B9J08_000058,B9J08_000174,B9J08_000229,B9J08_000274,B9J08_000458,B9J08_000465,B9J08_000682,B9J08_000686,B9J08_000740,B9J08_000766,B9J08_000776,B9J08_000808,B9J08_000975,B9J08_001169,B9J08_001224,B9J08_001389,B9J08_001447,B9J08_001464,B9J08_001467,B9J08_001759,B9J08_001860,B9J08_001875,B9J08_001889,B9J08_001999,B9J08_002078,B9J08_002113,B9J08_002231,B9J08_002453,B9J08_002519,B9J08_002…	19.9	1.43	1.6	0.000917794	0.0541776	1
GO:0016051	carbohydrate biosynthetic process	37	13	B9J08_000049,B9J08_000808,B9J08_000964,B9J08_000997,B9J08_001020,B9J08_001860,B9J08_001875,B9J08_001989,B9J08_002477,B9J08_002669,B9J08_002762,B9J08_004375,B9J08_005239,	35.1	2.52	3.39	0.000939496	0.0541776	1
GO:0019752	carboxylic acid metabolic process	330	66	B9J08_000013,B9J08_000058,B9J08_000174,B9J08_000229,B9J08_000274,B9J08_000458,B9J08_000465,B9J08_000682,B9J08_000686,B9J08_000740,B9J08_000766,B9J08_000776,B9J08_000808,B9J08_000975,B9J08_001169,B9J08_001224,B9J08_001447,B9J08_001467,B9J08_001759,B9J08_001860,B9J08_001875,B9J08_001889,B9J08_001999,B9J08_002078,B9J08_002113,B9J08_002231,B9J08_002453,B9J08_002519,B9J08_002536,B9J08_002566,B9J08_002…	20	1.44	1.61	0.00101338	0.0570792	1
GO:0044281	small molecule metabolic process	567	104	B9J08_000013,B9J08_000058,B9J08_000073,B9J08_000075,B9J08_000174,B9J08_000229,B9J08_000238,B9J08_000261,B9J08_000274,B9J08_000446,B9J08_000458,B9J08_000465,B9J08_000668,B9J08_000682,B9J08_000686,B9J08_000740,B9J08_000766,B9J08_000776,B9J08_000808,B9J08_000816,B9J08_000920,B9J08_000944,B9J08_000975,B9J08_001169,B9J08_001205,B9J08_001206,B9J08_001224,B9J08_001281,B9J08_001345,B9J08_001389,B9J08_001…	18.3	1.32	1.46	0.00104327	0.0574272	1
GO:0042273	ribosomal large subunit biogenesis	91	24	B9J08_000064,B9J08_000233,B9J08_000286,B9J08_000554,B9J08_000711,B9J08_000910,B9J08_001062,B9J08_001087,B9J08_001915,B9J08_002277,B9J08_002339,B9J08_002601,B9J08_003023,B9J08_003031,B9J08_003124,B9J08_003127,B9J08_003962,B9J08_004574,B9J08_004958,B9J08_005099,B9J08_005153,B9J08_005188,B9J08_005253,B9J08_005336,	26.4	1.89	2.26	0.00112933	0.060783	1
GO:0009259	ribonucleotide metabolic process	92	24	B9J08_000075,B9J08_000274,B9J08_000808,B9J08_000816,B9J08_001345,B9J08_001389,B9J08_001860,B9J08_001875,B9J08_002078,B9J08_002566,B9J08_002742,B9J08_002855,B9J08_003306,B9J08_003371,B9J08_003632,B9J08_003836,B9J08_003860,B9J08_004309,B9J08_004375,B9J08_004601,B9J08_004928,B9J08_004965,B9J08_005226,B9J08_005239,	26.1	1.87	2.23	0.00133226	0.0701465	1
GO:0097064	ncRNA export from nucleus	26	10	B9J08_000091,B9J08_000142,B9J08_001974,B9J08_003107,B9J08_003273,B9J08_003288,B9J08_003755,B9J08_004067,B9J08_004990,B9J08_005324,	38.5	2.76	3.91	0.00165945	0.0841114	1
GO:0044283	small molecule biosynthetic process	252	52	B9J08_000013,B9J08_000058,B9J08_000174,B9J08_000229,B9J08_000261,B9J08_000458,B9J08_000465,B9J08_000668,B9J08_000686,B9J08_000740,B9J08_000776,B9J08_000808,B9J08_000920,B9J08_001205,B9J08_001224,B9J08_001281,B9J08_001389,B9J08_001447,B9J08_001759,B9J08_001860,B9J08_001875,B9J08_002231,B9J08_002453,B9J08_002519,B9J08_002536,B9J08_002669,B9J08_002762,B9J08_002944,B9J08_002995,B9J08_003099,B9J08_003…	20.6	1.48	1.66	0.00171078	0.0841114	1
GO:0005975	carbohydrate metabolic process	148	34	B9J08_000049,B9J08_000054,B9J08_000229,B9J08_000274,B9J08_000808,B9J08_000918,B9J08_000958,B9J08_000964,B9J08_000997,B9J08_001020,B9J08_001860,B9J08_001875,B9J08_001989,B9J08_002477,B9J08_002512,B9J08_002566,B9J08_002669,B9J08_002762,B9J08_003211,B9J08_003251,B9J08_003291,B9J08_003306,B9J08_003371,B9J08_003397,B9J08_003632,B9J08_003836,B9J08_003837,B9J08_003838,B9J08_004309,B9J08_004375,B9J08_004…	23	1.65	1.89	0.00172719	0.0841114	1
GO:0000028	ribosomal small subunit assembly	11	6	B9J08_000254,B9J08_000605,B9J08_000632,B9J08_002921,B9J08_003288,B9J08_005324,	54.5	3.92	7.47	0.00176924	0.0841114	1
GO:0043436	oxoacid metabolic process	343	67	B9J08_000013,B9J08_000058,B9J08_000174,B9J08_000229,B9J08_000274,B9J08_000458,B9J08_000465,B9J08_000682,B9J08_000686,B9J08_000740,B9J08_000766,B9J08_000776,B9J08_000808,B9J08_000975,B9J08_001169,B9J08_001224,B9J08_001447,B9J08_001464,B9J08_001467,B9J08_001759,B9J08_001860,B9J08_001875,B9J08_001889,B9J08_001999,B9J08_002078,B9J08_002113,B9J08_002231,B9J08_002453,B9J08_002519,B9J08_002536,B9J08_002…	19.5	1.4	1.56	0.00177113	0.0841114	1
GO:0006270	DNA replication initiation	35	12	B9J08_001105,B9J08_001587,B9J08_001667,B9J08_001693,B9J08_002897,B9J08_003155,B9J08_003467,B9J08_003896,B9J08_003937,B9J08_004578,B9J08_005476,B9J08_005515,	34.3	2.46	3.26	0.00187204	0.0871937	1
GO:0030490	maturation of SSU-rRNA	100	25	B9J08_000107,B9J08_000120,B9J08_000203,B9J08_000605,B9J08_000632,B9J08_000771,B9J08_000998,B9J08_001674,B9J08_001870,B9J08_002135,B9J08_002615,B9J08_002921,B9J08_002961,B9J08_003031,B9J08_003089,B9J08_003248,B9J08_003273,B9J08_003288,B9J08_003677,B9J08_004014,B9J08_004502,B9J08_004574,B9J08_004826,B9J08_004956,B9J08_005324,	25	1.79	2.1	0.0020398	0.0932152	1
GO:0000027	ribosomal large subunit assembly	31	11	B9J08_000064,B9J08_000286,B9J08_000554,B9J08_000711,B9J08_001062,B9J08_002339,B9J08_002601,B9J08_003023,B9J08_004958,B9J08_005099,B9J08_005336,	35.5	2.55	3.44	0.00210356	0.0943486	1
GO:0044267	cellular protein metabolic process	954	161	B9J08_000064,B9J08_000090,B9J08_000091,B9J08_000102,B9J08_000107,B9J08_000136,B9J08_000142,B9J08_000185,B9J08_000203,B9J08_000209,B9J08_000217,B9J08_000254,B9J08_000290,B9J08_000346,B9J08_000458,B9J08_000461,B9J08_000554,B9J08_000604,B9J08_000605,B9J08_000632,B9J08_000703,B9J08_000711,B9J08_000727,B9J08_000728,B9J08_000771,B9J08_000822,B9J08_000878,B9J08_000915,B9J08_000955,B9J08_000975,B9J08_000…	16.9	1.21	1.34	0.00224286	0.0987672	1
GO:0008152	metabolic process	2823	426	B9J08_000008,B9J08_000013,B9J08_000049,B9J08_000054,B9J08_000058,B9J08_000064,B9J08_000073,B9J08_000075,B9J08_000082,B9J08_000090,B9J08_000091,B9J08_000102,B9J08_000107,B9J08_000120,B9J08_000136,B9J08_000142,B9J08_000144,B9J08_000169,B9J08_000174,B9J08_000185,B9J08_000203,B9J08_000209,B9J08_000217,B9J08_000229,B9J08_000233,B9J08_000238,B9J08_000254,B9J08_000261,B9J08_000274,B9J08_000290,B9J08_000…	15.1	1.08	1.28	0.00258814	0.106937	1
GO:0000462	maturation of SSU-rRNA from tricistronic rRNA transcript (SSU-rRNA, 5.8S rRNA, LSU-rRNA)	91	23	B9J08_000107,B9J08_000120,B9J08_000203,B9J08_000605,B9J08_000771,B9J08_000998,B9J08_001674,B9J08_001870,B9J08_002135,B9J08_002615,B9J08_002921,B9J08_002961,B9J08_003031,B9J08_003089,B9J08_003248,B9J08_003273,B9J08_003677,B9J08_004014,B9J08_004502,B9J08_004574,B9J08_004826,B9J08_004956,B9J08_005324,	25.3	1.81	2.13	0.00260987	0.106937	1
GO:1902222	erythrose 4-phosphate/phosphoenolpyruvate family amino acid catabolic process	3	3	B9J08_002231,B9J08_004930,B9J08_005516,	100	7.18	inf	0.00269329	0.106937	1
GO:0006002	fructose 6-phosphate metabolic process	3	3	B9J08_002566,B9J08_004309,B9J08_004928,	100	7.18	inf	0.00269329	0.106937	1
GO:0006559	L-phenylalanine catabolic process	3	3	B9J08_002231,B9J08_004930,B9J08_005516,	100	7.18	inf	0.00269329	0.106937	1
GO:0000461	endonucleolytic cleavage to generate mature 3'-end of SSU-rRNA from (SSU-rRNA, 5.8S rRNA, LSU-rRNA)	3	3	B9J08_000120,B9J08_000998,B9J08_005324,	100	7.18	inf	0.00269329	0.106937	1
GO:0019693	ribose phosphate metabolic process	97	24	B9J08_000075,B9J08_000274,B9J08_000808,B9J08_000816,B9J08_001345,B9J08_001389,B9J08_001860,B9J08_001875,B9J08_002078,B9J08_002566,B9J08_002742,B9J08_002855,B9J08_003306,B9J08_003371,B9J08_003632,B9J08_003836,B9J08_003860,B9J08_004309,B9J08_004375,B9J08_004601,B9J08_004928,B9J08_004965,B9J08_005226,B9J08_005239,	24.7	1.78	2.07	0.0028835	0.112642	1
GO:0042274	ribosomal small subunit biogenesis	115	27	B9J08_000091,B9J08_000107,B9J08_000120,B9J08_000203,B9J08_000254,B9J08_000605,B9J08_000632,B9J08_000771,B9J08_000998,B9J08_001674,B9J08_001870,B9J08_002135,B9J08_002615,B9J08_002921,B9J08_002961,B9J08_003031,B9J08_003089,B9J08_003248,B9J08_003273,B9J08_003288,B9J08_003677,B9J08_004014,B9J08_004502,B9J08_004574,B9J08_004826,B9J08_004956,B9J08_005324,	23.5	1.69	1.93	0.00362187	0.139241	1
GO:0046034	ATP metabolic process	57	16	B9J08_000274,B9J08_000808,B9J08_001860,B9J08_001875,B9J08_002231,B9J08_002566,B9J08_002855,B9J08_003306,B9J08_003371,B9J08_003632,B9J08_003836,B9J08_004309,B9J08_004375,B9J08_004928,B9J08_005226,B9J08_005239,	28.1	2.01	2.45	0.0037526	0.142013	1
GO:0019344	cysteine biosynthetic process	9	5	B9J08_000058,B9J08_000174,B9J08_001224,B9J08_002995,B9J08_005307,	55.6	3.99	7.77	0.00400851	0.142774	1
GO:1902975	mitotic DNA replication initiation	9	5	B9J08_001667,B9J08_001693,B9J08_003467,B9J08_005476,B9J08_005515,	55.6	3.99	7.77	0.00400851	0.142774	1
GO:0000103	sulfate assimilation	9	5	B9J08_001224,B9J08_002531,B9J08_002995,B9J08_003552,B9J08_005307,	55.6	3.99	7.77	0.00400851	0.142774	1
GO:0006279	premeiotic DNA replication	9	5	B9J08_000784,B9J08_001693,B9J08_003467,B9J08_003592,B9J08_005515,	55.6	3.99	7.77	0.00400851	0.142774	1
GO:0009081	branched-chain amino acid metabolic process	17	7	B9J08_000013,B9J08_000229,B9J08_002453,B9J08_003105,B9J08_003440,B9J08_004155,B9J08_004930,	41.2	2.96	4.36	0.00538948	0.189179	1
GO:0032787	monocarboxylic acid metabolic process	131	29	B9J08_000229,B9J08_000274,B9J08_000458,B9J08_000682,B9J08_000776,B9J08_000808,B9J08_001759,B9J08_001860,B9J08_001875,B9J08_001889,B9J08_002231,B9J08_002536,B9J08_002566,B9J08_002688,B9J08_002780,B9J08_002891,B9J08_003231,B9J08_003306,B9J08_003371,B9J08_003632,B9J08_003737,B9J08_003836,B9J08_004309,B9J08_004375,B9J08_004507,B9J08_004590,B9J08_004928,B9J08_005226,B9J08_005239,	22.1	1.59	1.79	0.00642581	0.222333	1
GO:0010467	gene expression	958	158	B9J08_000064,B9J08_000082,B9J08_000090,B9J08_000091,B9J08_000102,B9J08_000107,B9J08_000120,B9J08_000136,B9J08_000142,B9J08_000185,B9J08_000203,B9J08_000209,B9J08_000217,B9J08_000233,B9J08_000254,B9J08_000333,B9J08_000346,B9J08_000445,B9J08_000461,B9J08_000554,B9J08_000604,B9J08_000605,B9J08_000632,B9J08_000711,B9J08_000727,B9J08_000728,B9J08_000771,B9J08_000774,B9J08_000878,B9J08_000910,B9J08_000…	16.5	1.18	1.29	0.00659528	0.224983	1
GO:0019538	protein metabolic process	1033	169	B9J08_000064,B9J08_000090,B9J08_000091,B9J08_000102,B9J08_000107,B9J08_000136,B9J08_000142,B9J08_000185,B9J08_000203,B9J08_000209,B9J08_000217,B9J08_000254,B9J08_000290,B9J08_000346,B9J08_000445,B9J08_000458,B9J08_000461,B9J08_000554,B9J08_000604,B9J08_000605,B9J08_000632,B9J08_000703,B9J08_000711,B9J08_000727,B9J08_000728,B9J08_000771,B9J08_000822,B9J08_000878,B9J08_000915,B9J08_000955,B9J08_000…	16.4	1.17	1.28	0.00676232	0.227477	1
GO:0009218	pyrimidine ribonucleotide metabolic process	10	5	B9J08_000816,B9J08_002078,B9J08_002742,B9J08_004601,B9J08_004965,	50	3.59	6.22	0.00710608	0.228497	1
GO:1902292	cell cycle DNA replication initiation	10	5	B9J08_001667,B9J08_001693,B9J08_003467,B9J08_005476,B9J08_005515,	50	3.59	6.22	0.00710608	0.228497	1
GO:1902315	nuclear cell cycle DNA replication initiation	10	5	B9J08_001667,B9J08_001693,B9J08_003467,B9J08_005476,B9J08_005515,	50	3.59	6.22	0.00710608	0.228497	1
GO:0072528	pyrimidine-containing compound biosynthetic process	22	8	B9J08_000668,B9J08_000816,B9J08_001205,B9J08_002078,B9J08_002742,B9J08_003099,B9J08_004601,B9J08_004965,	36.4	2.61	3.56	0.00717002	0.228497	1
GO:0009150	purine ribonucleotide metabolic process	82	20	B9J08_000075,B9J08_000274,B9J08_000808,B9J08_000816,B9J08_001345,B9J08_001389,B9J08_001860,B9J08_001875,B9J08_002566,B9J08_002855,B9J08_003306,B9J08_003371,B9J08_003632,B9J08_003836,B9J08_003860,B9J08_004309,B9J08_004375,B9J08_004928,B9J08_005226,B9J08_005239,	24.4	1.75	2.02	0.00740588	0.232948	1
GO:0098739	import across plasma membrane	18	7	B9J08_000002,B9J08_000172,B9J08_000756,B9J08_001567,B9J08_002080,B9J08_002901,B9J08_002974,	38.9	2.79	3.96	0.00777795	0.241515	1
GO:0006163	purine nucleotide metabolic process	83	20	B9J08_000075,B9J08_000274,B9J08_000808,B9J08_000816,B9J08_001345,B9J08_001389,B9J08_001860,B9J08_001875,B9J08_002566,B9J08_002855,B9J08_003306,B9J08_003371,B9J08_003632,B9J08_003836,B9J08_003860,B9J08_004309,B9J08_004375,B9J08_004928,B9J08_005226,B9J08_005239,	24.1	1.73	1.99	0.00852283	0.261295	1
GO:0006520	cellular amino acid metabolic process	193	39	B9J08_000013,B9J08_000058,B9J08_000174,B9J08_000229,B9J08_000465,B9J08_000686,B9J08_000740,B9J08_000766,B9J08_000975,B9J08_001169,B9J08_001224,B9J08_001447,B9J08_001467,B9J08_001999,B9J08_002078,B9J08_002113,B9J08_002231,B9J08_002453,B9J08_002519,B9J08_002944,B9J08_002995,B9J08_003046,B9J08_003105,B9J08_003217,B9J08_003330,B9J08_003339,B9J08_003440,B9J08_003783,B9J08_003882,B9J08_004016,B9J08_004…	20.2	1.45	1.6	0.00897502	0.262663	1
GO:0006261	DNA-dependent DNA replication	100	23	B9J08_000784,B9J08_000922,B9J08_001105,B9J08_001220,B9J08_001469,B9J08_001474,B9J08_001587,B9J08_001667,B9J08_001693,B9J08_002225,B9J08_002845,B9J08_002897,B9J08_002929,B9J08_003155,B9J08_003338,B9J08_003467,B9J08_003592,B9J08_003896,B9J08_003937,B9J08_004578,B9J08_005258,B9J08_005476,B9J08_005515,	23	1.65	1.88	0.0090286	0.262663	1
GO:0006551	leucine metabolic process	7	4	B9J08_000229,B9J08_002453,B9J08_004155,B9J08_004930,	57.1	4.1	8.28	0.00921204	0.262663	1
GO:2001245	regulation of phosphatidylcholine biosynthetic process	4	3	B9J08_000444,B9J08_000635,B9J08_002442,	75	5.38	18.61	0.00965196	0.262663	1
GO:0002182	cytoplasmic translational elongation	4	3	B9J08_001917,B9J08_003721,B9J08_004579,	75	5.38	18.61	0.00965196	0.262663	1
GO:0006269	DNA replication, synthesis of RNA primer	4	3	B9J08_001474,B9J08_002225,B9J08_005515,	75	5.38	18.61	0.00965196	0.262663	1
GO:0150172	regulation of phosphatidylcholine metabolic process	4	3	B9J08_000444,B9J08_000635,B9J08_002442,	75	5.38	18.61	0.00965196	0.262663	1
GO:0046323	glucose import	4	3	B9J08_002566,B9J08_003836,B9J08_005226,	75	5.38	18.61	0.00965196	0.262663	1
GO:0070814	hydrogen sulfide biosynthetic process	4	3	B9J08_001224,B9J08_002995,B9J08_005307,	75	5.38	18.61	0.00965196	0.262663	1
GO:0070813	hydrogen sulfide metabolic process	4	3	B9J08_001224,B9J08_002995,B9J08_005307,	75	5.38	18.61	0.00965196	0.262663	1
GO:0006450	regulation of translational fidelity	19	7	B9J08_000102,B9J08_000203,B9J08_003216,B9J08_003634,B9J08_003677,B9J08_003894,B9J08_004990,	36.8	2.64	3.63	0.010865	0.292388	1
GO:0000041	transition metal ion transport	33	10	B9J08_000002,B9J08_000170,B9J08_000418,B9J08_000434,B9J08_001450,B9J08_001464,B9J08_001856,B9J08_002280,B9J08_003002,B9J08_003341,	30.3	2.18	2.71	0.0116309	0.30773	1
GO:0006415	translational termination	15	6	B9J08_002532,B9J08_002601,B9J08_002813,B9J08_003216,B9J08_005585,B9J08_005586,	40	2.87	4.15	0.0116892	0.30773	1
GO:0009117	nucleotide metabolic process	131	28	B9J08_000075,B9J08_000238,B9J08_000274,B9J08_000808,B9J08_000816,B9J08_000944,B9J08_001345,B9J08_001389,B9J08_001860,B9J08_001875,B9J08_002078,B9J08_002566,B9J08_002742,B9J08_002855,B9J08_003306,B9J08_003371,B9J08_003632,B9J08_003682,B9J08_003836,B9J08_003860,B9J08_004309,B9J08_004375,B9J08_004601,B9J08_004928,B9J08_004965,B9J08_005078,B9J08_005226,B9J08_005239,	21.4	1.53	1.71	0.011921	0.31046	1
GO:0006807	nitrogen compound metabolic process	2217	336	B9J08_000013,B9J08_000058,B9J08_000064,B9J08_000075,B9J08_000082,B9J08_000090,B9J08_000091,B9J08_000102,B9J08_000107,B9J08_000120,B9J08_000136,B9J08_000142,B9J08_000174,B9J08_000185,B9J08_000203,B9J08_000209,B9J08_000217,B9J08_000229,B9J08_000233,B9J08_000238,B9J08_000254,B9J08_000274,B9J08_000290,B9J08_000333,B9J08_000346,B9J08_000411,B9J08_000425,B9J08_000445,B9J08_000446,B9J08_000447,B9J08_000…	15.2	1.09	1.21	0.0122049	0.314471	1
GO:0006091	generation of precursor metabolites and energy	114	25	B9J08_000274,B9J08_000420,B9J08_000434,B9J08_000808,B9J08_000997,B9J08_001206,B9J08_001860,B9J08_001863,B9J08_001875,B9J08_001989,B9J08_002231,B9J08_002477,B9J08_002566,B9J08_002900,B9J08_003291,B9J08_003306,B9J08_003371,B9J08_003418,B9J08_003632,B9J08_003836,B9J08_004309,B9J08_004375,B9J08_004928,B9J08_005226,B9J08_005239,	21.9	1.57	1.76	0.0123403	0.314613	1
GO:1901605	alpha-amino acid metabolic process	132	28	B9J08_000058,B9J08_000174,B9J08_000229,B9J08_000686,B9J08_000740,B9J08_001169,B9J08_001224,B9J08_001447,B9J08_001467,B9J08_002078,B9J08_002231,B9J08_002453,B9J08_002519,B9J08_002995,B9J08_003105,B9J08_003217,B9J08_003339,B9J08_003440,B9J08_003783,B9J08_004016,B9J08_004124,B9J08_004155,B9J08_004317,B9J08_004798,B9J08_004930,B9J08_005061,B9J08_005307,B9J08_005516,	21.2	1.52	1.69	0.0131976	0.332964	1
GO:0015849	organic acid transport	54	14	B9J08_000034,B9J08_000449,B9J08_001530,B9J08_001567,B9J08_001673,B9J08_002006,B9J08_002102,B9J08_002280,B9J08_002901,B9J08_002974,B9J08_004591,B9J08_004592,B9J08_005239,B9J08_005526,	25.9	1.86	2.19	0.0136128	0.339899	1
GO:0006066	alcohol metabolic process	76	18	B9J08_000073,B9J08_000261,B9J08_000446,B9J08_000668,B9J08_000920,B9J08_001205,B9J08_001206,B9J08_001389,B9J08_002231,B9J08_002762,B9J08_002807,B9J08_003099,B9J08_003408,B9J08_003737,B9J08_004380,B9J08_004709,B9J08_004930,B9J08_004943,	23.7	1.7	1.94	0.014608	0.347752	1
GO:0048478	replication fork protection	8	4	B9J08_001220,B9J08_001469,B9J08_002929,B9J08_003467,	50	3.59	6.21	0.0164131	0.347752	1
GO:0051095	regulation of helicase activity	8	4	B9J08_003467,B9J08_005188,B9J08_005385,B9J08_005476,	50	3.59	6.21	0.0164131	0.347752	1
GO:0016310	phosphorylation	152	31	B9J08_000274,B9J08_000290,B9J08_000458,B9J08_000808,B9J08_000816,B9J08_000822,B9J08_001344,B9J08_001345,B9J08_001389,B9J08_001824,B9J08_001860,B9J08_001875,B9J08_002053,B9J08_002445,B9J08_002566,B9J08_002792,B9J08_002977,B9J08_003306,B9J08_003371,B9J08_003632,B9J08_003836,B9J08_004028,B9J08_004309,B9J08_004375,B9J08_004785,B9J08_004928,B9J08_005003,B9J08_005226,B9J08_005239,B9J08_005249,B9J08_005…	20.4	1.46	1.61	0.0164263	0.347752	1
GO:0006271	DNA strand elongation involved in DNA replication	25	8	B9J08_001105,B9J08_001587,B9J08_001693,B9J08_002845,B9J08_003338,B9J08_003467,B9J08_005258,B9J08_005476,	32	2.3	2.93	0.0165777	0.347752	1
GO:0009082	branched-chain amino acid biosynthetic process	12	5	B9J08_000013,B9J08_000229,B9J08_002453,B9J08_003105,B9J08_003440,	41.7	2.99	4.44	0.0175737	0.347752	1
GO:0006753	nucleoside phosphate metabolic process	135	28	B9J08_000075,B9J08_000238,B9J08_000274,B9J08_000808,B9J08_000816,B9J08_000944,B9J08_001345,B9J08_001389,B9J08_001860,B9J08_001875,B9J08_002078,B9J08_002566,B9J08_002742,B9J08_002855,B9J08_003306,B9J08_003371,B9J08_003632,B9J08_003682,B9J08_003836,B9J08_003860,B9J08_004309,B9J08_004375,B9J08_004601,B9J08_004928,B9J08_004965,B9J08_005078,B9J08_005226,B9J08_005239,	20.7	1.49	1.64	0.0177005	0.347752	1
GO:0000096	sulfur amino acid metabolic process	35	10	B9J08_000058,B9J08_000174,B9J08_001224,B9J08_001467,B9J08_002995,B9J08_003217,B9J08_003339,B9J08_004930,B9J08_005199,B9J08_005307,	28.6	2.05	2.49	0.0178196	0.347752	1
GO:0006865	amino acid transport	35	10	B9J08_000449,B9J08_001530,B9J08_001567,B9J08_001673,B9J08_002006,B9J08_002102,B9J08_002280,B9J08_002901,B9J08_005239,B9J08_005526,	28.6	2.05	2.49	0.0178196	0.347752	1
GO:1901607	alpha-amino acid biosynthetic process	89	20	B9J08_000058,B9J08_000174,B9J08_000229,B9J08_000686,B9J08_000740,B9J08_001224,B9J08_001447,B9J08_002453,B9J08_002519,B9J08_002995,B9J08_003105,B9J08_003217,B9J08_003339,B9J08_003440,B9J08_003783,B9J08_004016,B9J08_004124,B9J08_004317,B9J08_004798,B9J08_005307,	22.5	1.61	1.82	0.0183911	0.347752	1
GO:0006364	rRNA processing	208	40	B9J08_000082,B9J08_000102,B9J08_000107,B9J08_000120,B9J08_000203,B9J08_000233,B9J08_000605,B9J08_000632,B9J08_000771,B9J08_000910,B9J08_000998,B9J08_001674,B9J08_001803,B9J08_001870,B9J08_001915,B9J08_002135,B9J08_002277,B9J08_002339,B9J08_002615,B9J08_002719,B9J08_002746,B9J08_002921,B9J08_002961,B9J08_003023,B9J08_003031,B9J08_003089,B9J08_003124,B9J08_003127,B9J08_003248,B9J08_003273,B9J08_003…	19.2	1.38	1.5	0.0184839	0.347752	1
GO:0006260	DNA replication	112	24	B9J08_000784,B9J08_000922,B9J08_001105,B9J08_001220,B9J08_001469,B9J08_001474,B9J08_001587,B9J08_001667,B9J08_001693,B9J08_002225,B9J08_002845,B9J08_002897,B9J08_002929,B9J08_003155,B9J08_003338,B9J08_003467,B9J08_003592,B9J08_003896,B9J08_003937,B9J08_004578,B9J08_004601,B9J08_005258,B9J08_005476,B9J08_005515,	21.4	1.54	1.71	0.0184892	0.347752	1
GO:0071704	organic substance metabolic process	2549	380	B9J08_000013,B9J08_000049,B9J08_000054,B9J08_000058,B9J08_000064,B9J08_000073,B9J08_000075,B9J08_000082,B9J08_000090,B9J08_000091,B9J08_000102,B9J08_000107,B9J08_000120,B9J08_000136,B9J08_000142,B9J08_000174,B9J08_000185,B9J08_000203,B9J08_000209,B9J08_000217,B9J08_000229,B9J08_000233,B9J08_000238,B9J08_000254,B9J08_000261,B9J08_000274,B9J08_000290,B9J08_000333,B9J08_000346,B9J08_000425,B9J08_000…	14.9	1.07	1.2	0.0192026	0.347752	1
GO:0000949	aromatic amino acid family catabolic process to alcohol via Ehrlich pathway	2	2	B9J08_002231,B9J08_004930,	100	7.18	inf	0.0193834	0.347752	1
GO:0006007	glucose catabolic process	2	2	B9J08_001875,B9J08_003632,	100	7.18	inf	0.0193834	0.347752	1
GO:0090344	negative regulation of cell aging	2	2	B9J08_000645,B9J08_003364,	100	7.18	inf	0.0193834	0.347752	1
GO:0006044	N-acetylglucosamine metabolic process	2	2	B9J08_003837,B9J08_003838,	100	7.18	inf	0.0193834	0.347752	1
GO:0006240	dCDP biosynthetic process	2	2	B9J08_004601,B9J08_004965,	100	7.18	inf	0.0193834	0.347752	1
GO:1905463	negative regulation of DNA duplex unwinding	2	2	B9J08_003467,B9J08_005476,	100	7.18	inf	0.0193834	0.347752	1
GO:0046704	CDP metabolic process	2	2	B9J08_004601,B9J08_004965,	100	7.18	inf	0.0193834	0.347752	1
GO:0000770	peptide pheromone export	2	2	B9J08_002388,B9J08_002389,	100	7.18	inf	0.0193834	0.347752	1
GO:0061621	canonical glycolysis	2	2	B9J08_001875,B9J08_003632,	100	7.18	inf	0.0193834	0.347752	1
GO:2001246	negative regulation of phosphatidylcholine biosynthetic process	2	2	B9J08_000444,B9J08_000635,	100	7.18	inf	0.0193834	0.347752	1
GO:0061718	glucose catabolic process to pyruvate	2	2	B9J08_001875,B9J08_003632,	100	7.18	inf	0.0193834	0.347752	1
GO:0150174	negative regulation of phosphatidylcholine metabolic process	2	2	B9J08_000444,B9J08_000635,	100	7.18	inf	0.0193834	0.347752	1
GO:0006572	tyrosine catabolic process	2	2	B9J08_004155,B9J08_005516,	100	7.18	inf	0.0193834	0.347752	1
GO:0046039	GTP metabolic process	2	2	B9J08_000816,B9J08_001345,	100	7.18	inf	0.0193834	0.347752	1
GO:0010817	regulation of hormone levels	2	2	B9J08_002388,B9J08_002389,	100	7.18	inf	0.0193834	0.347752	1
GO:1905775	negative regulation of DNA helicase activity	2	2	B9J08_003467,B9J08_005476,	100	7.18	inf	0.0193834	0.347752	1
GO:0009193	pyrimidine ribonucleoside diphosphate metabolic process	2	2	B9J08_004601,B9J08_004965,	100	7.18	inf	0.0193834	0.347752	1
GO:0006011	UDP-glucose metabolic process	2	2	B9J08_001989,B9J08_002477,	100	7.18	inf	0.0193834	0.347752	1
GO:0061620	glycolytic process through glucose-6-phosphate	2	2	B9J08_001875,B9J08_003632,	100	7.18	inf	0.0193834	0.347752	1
GO:1905774	regulation of DNA helicase activity	2	2	B9J08_003467,B9J08_005476,	100	7.18	inf	0.0193834	0.347752	1
GO:0046062	dCDP metabolic process	2	2	B9J08_004601,B9J08_004965,	100	7.18	inf	0.0193834	0.347752	1
GO:0015855	pyrimidine nucleobase transport	2	2	B9J08_000756,B9J08_002435,	100	7.18	inf	0.0193834	0.347752	1
GO:0009914	hormone transport	2	2	B9J08_002388,B9J08_002389,	100	7.18	inf	0.0193834	0.347752	1
GO:1905462	regulation of DNA duplex unwinding	2	2	B9J08_003467,B9J08_005476,	100	7.18	inf	0.0193834	0.347752	1
GO:0061615	glycolytic process through fructose-6-phosphate	2	2	B9J08_001875,B9J08_003632,	100	7.18	inf	0.0193834	0.347752	1
GO:0009070	serine family amino acid biosynthetic process	21	7	B9J08_000058,B9J08_000174,B9J08_001224,B9J08_002519,B9J08_002995,B9J08_003217,B9J08_005307,	33.3	2.39	3.11	0.0195372	0.347935	1
GO:0071940	fungal-type cell wall assembly	26	8	B9J08_000614,B9J08_000822,B9J08_000958,B9J08_000964,B9J08_001034,B9J08_001269,B9J08_002053,B9J08_005403,	30.8	2.21	2.77	0.0211072	0.354097	1
GO:0070726	cell wall assembly	26	8	B9J08_000614,B9J08_000822,B9J08_000958,B9J08_000964,B9J08_001034,B9J08_001269,B9J08_002053,B9J08_005403,	30.8	2.21	2.77	0.0211072	0.354097	1
GO:0072527	pyrimidine-containing compound metabolic process	26	8	B9J08_000668,B9J08_000816,B9J08_001205,B9J08_002078,B9J08_002742,B9J08_003099,B9J08_004601,B9J08_004965,	30.8	2.21	2.77	0.0211072	0.354097	1
GO:0016053	organic acid biosynthetic process	167	33	B9J08_000013,B9J08_000058,B9J08_000174,B9J08_000229,B9J08_000458,B9J08_000465,B9J08_000686,B9J08_000740,B9J08_000776,B9J08_001224,B9J08_001447,B9J08_001759,B9J08_002453,B9J08_002519,B9J08_002536,B9J08_002944,B9J08_002995,B9J08_003105,B9J08_003217,B9J08_003339,B9J08_003440,B9J08_003632,B9J08_003737,B9J08_003783,B9J08_003882,B9J08_004016,B9J08_004124,B9J08_004317,B9J08_004507,B9J08_004590,B9J08_004…	19.8	1.42	1.55	0.0212278	0.354097	1
GO:0022413	reproductive process in single-celled organism	96	21	B9J08_000444,B9J08_000458,B9J08_000614,B9J08_000958,B9J08_000964,B9J08_001034,B9J08_001102,B9J08_001269,B9J08_002053,B9J08_002069,B9J08_002536,B9J08_002814,B9J08_002929,B9J08_002977,B9J08_002984,B9J08_004028,B9J08_004578,B9J08_005003,B9J08_005403,B9J08_005405,B9J08_005515,	21.9	1.57	1.75	0.0213295	0.354097	1
GO:0009083	branched-chain amino acid catabolic process	5	3	B9J08_002453,B9J08_004155,B9J08_004930,	60	4.31	9.31	0.0216377	0.354097	1
GO:0009405	obsolete pathogenesis	5	3	B9J08_001531,B9J08_002582,B9J08_004892,	60	4.31	9.31	0.0216377	0.354097	1
GO:0090230	regulation of centromere complex assembly	5	3	B9J08_000651,B9J08_001693,B9J08_001972,	60	4.31	9.31	0.0216377	0.354097	1
GO:0019320	hexose catabolic process	5	3	B9J08_001875,B9J08_002477,B9J08_003632,	60	4.31	9.31	0.0216377	0.354097	1
GO:1903097	regulation of CENP-A containing nucleosome assembly	5	3	B9J08_000651,B9J08_001693,B9J08_001972,	60	4.31	9.31	0.0216377	0.354097	1
GO:0006013	mannose metabolic process	5	3	B9J08_002566,B9J08_003836,B9J08_005226,	60	4.31	9.31	0.0216377	0.354097	1
GO:0015740	C4-dicarboxylate transport	5	3	B9J08_000034,B9J08_001530,B9J08_005239,	60	4.31	9.31	0.0216377	0.354097	1
GO:0006826	iron ion transport	17	6	B9J08_000002,B9J08_000170,B9J08_000418,B9J08_000434,B9J08_001450,B9J08_003002,	35.3	2.53	3.39	0.02263	0.367852	1
GO:0140694	non-membrane-bounded organelle assembly	97	21	B9J08_000064,B9J08_000142,B9J08_000254,B9J08_000286,B9J08_000554,B9J08_000605,B9J08_000632,B9J08_000711,B9J08_001062,B9J08_002339,B9J08_002601,B9J08_002855,B9J08_002921,B9J08_003023,B9J08_003288,B9J08_004958,B9J08_005099,B9J08_005188,B9J08_005249,B9J08_005324,B9J08_005336,	21.6	1.55	1.73	0.0237924	0.384168	1
GO:0006534	cysteine metabolic process	13	5	B9J08_000058,B9J08_000174,B9J08_001224,B9J08_002995,B9J08_005307,	38.5	2.76	3.88	0.0253525	0.403177	1
GO:0006811	ion transport	219	41	B9J08_000002,B9J08_000008,B9J08_000034,B9J08_000170,B9J08_000175,B9J08_000418,B9J08_000434,B9J08_000435,B9J08_000677,B9J08_000701,B9J08_000995,B9J08_001162,B9J08_001450,B9J08_001464,B9J08_001530,B9J08_001567,B9J08_001581,B9J08_001856,B9J08_001889,B9J08_002080,B9J08_002280,B9J08_002630,B9J08_002715,B9J08_002795,B9J08_002855,B9J08_002901,B9J08_002974,B9J08_003002,B9J08_003341,B9J08_004038,B9J08_004…	18.7	1.34	1.45	0.0261279	0.403177	1
GO:0015851	nucleobase transport	9	4	B9J08_000756,B9J08_002435,B9J08_003017,B9J08_004513,	44.4	3.19	4.97	0.0263368	0.403177	1
GO:0009310	amine catabolic process	9	4	B9J08_002231,B9J08_002774,B9J08_004507,B9J08_004930,	44.4	3.19	4.97	0.0263368	0.403177	1
GO:1905039	carboxylic acid transmembrane transport	27	8	B9J08_001530,B9J08_001567,B9J08_002006,B9J08_002901,B9J08_002974,B9J08_004591,B9J08_004592,B9J08_005239,	29.6	2.13	2.62	0.0264477	0.403177	1
GO:1902969	mitotic DNA replication	27	8	B9J08_001105,B9J08_001667,B9J08_001693,B9J08_002845,B9J08_003467,B9J08_004578,B9J08_005476,B9J08_005515,	29.6	2.13	2.62	0.0264477	0.403177	1
GO:0098657	import into cell	27	8	B9J08_000002,B9J08_000172,B9J08_000418,B9J08_000756,B9J08_001567,B9J08_002080,B9J08_002901,B9J08_002974,	29.6	2.13	2.62	0.0264477	0.403177	1
GO:1903825	organic acid transmembrane transport	27	8	B9J08_001530,B9J08_001567,B9J08_002006,B9J08_002901,B9J08_002974,B9J08_004591,B9J08_004592,B9J08_005239,	29.6	2.13	2.62	0.0264477	0.403177	1
GO:0008652	cellular amino acid biosynthetic process	98	21	B9J08_000058,B9J08_000174,B9J08_000229,B9J08_000686,B9J08_000740,B9J08_001224,B9J08_001447,B9J08_002453,B9J08_002519,B9J08_002944,B9J08_002995,B9J08_003105,B9J08_003217,B9J08_003339,B9J08_003440,B9J08_003783,B9J08_004016,B9J08_004124,B9J08_004317,B9J08_004798,B9J08_005307,	21.4	1.54	1.71	0.0264679	0.403177	1
GO:0044238	primary metabolic process	2377	354	B9J08_000013,B9J08_000049,B9J08_000054,B9J08_000058,B9J08_000064,B9J08_000075,B9J08_000082,B9J08_000090,B9J08_000091,B9J08_000102,B9J08_000107,B9J08_000120,B9J08_000136,B9J08_000142,B9J08_000174,B9J08_000185,B9J08_000203,B9J08_000209,B9J08_000217,B9J08_000229,B9J08_000233,B9J08_000238,B9J08_000254,B9J08_000261,B9J08_000274,B9J08_000290,B9J08_000333,B9J08_000346,B9J08_000425,B9J08_000444,B9J08_000…	14.9	1.07	1.18	0.0295353	0.44709	1
GO:0000076	DNA replication checkpoint signaling	18	6	B9J08_001220,B9J08_001469,B9J08_001693,B9J08_002929,B9J08_003937,B9J08_004578,	33.3	2.39	3.11	0.0300561	0.449357	1
GO:0097035	regulation of membrane lipid distribution	18	6	B9J08_000220,B9J08_000435,B9J08_002442,B9J08_003373,B9J08_004344,B9J08_004785,	33.3	2.39	3.11	0.0300561	0.449357	1
GO:0000478	endonucleolytic cleavage involved in rRNA processing	54	13	B9J08_000120,B9J08_000998,B9J08_001674,B9J08_002135,B9J08_002615,B9J08_003127,B9J08_003273,B9J08_004014,B9J08_004502,B9J08_004574,B9J08_004826,B9J08_005253,B9J08_005324,	24.1	1.73	1.98	0.030892	0.456222	1
GO:0000479	endonucleolytic cleavage of tricistronic rRNA transcript (SSU-rRNA, 5.8S rRNA, LSU-rRNA)	54	13	B9J08_000120,B9J08_000998,B9J08_001674,B9J08_002135,B9J08_002615,B9J08_003127,B9J08_003273,B9J08_004014,B9J08_004502,B9J08_004574,B9J08_004826,B9J08_005253,B9J08_005324,	24.1	1.73	1.98	0.030892	0.456222	1
GO:0055086	nucleobase-containing small molecule metabolic process	166	32	B9J08_000075,B9J08_000238,B9J08_000274,B9J08_000808,B9J08_000816,B9J08_000944,B9J08_001345,B9J08_001389,B9J08_001860,B9J08_001875,B9J08_001989,B9J08_002078,B9J08_002477,B9J08_002512,B9J08_002566,B9J08_002742,B9J08_002855,B9J08_003306,B9J08_003371,B9J08_003632,B9J08_003682,B9J08_003836,B9J08_003860,B9J08_004076,B9J08_004309,B9J08_004375,B9J08_004601,B9J08_004928,B9J08_004965,B9J08_005078,B9J08_005…	19.3	1.38	1.5	0.0318547	0.467588	1
GO:0044042	glucan metabolic process	28	8	B9J08_000049,B9J08_000964,B9J08_000997,B9J08_001020,B9J08_001989,B9J08_002477,B9J08_003251,B9J08_003291,	28.6	2.05	2.49	0.0326595	0.470841	1
GO:0022616	DNA strand elongation	28	8	B9J08_001105,B9J08_001587,B9J08_001693,B9J08_002845,B9J08_003338,B9J08_003467,B9J08_005258,B9J08_005476,	28.6	2.05	2.49	0.0326595	0.470841	1
GO:0006073	cellular glucan metabolic process	28	8	B9J08_000049,B9J08_000964,B9J08_000997,B9J08_001020,B9J08_001989,B9J08_002477,B9J08_003251,B9J08_003291,	28.6	2.05	2.49	0.0326595	0.470841	1
GO:0051099	positive regulation of binding	14	5	B9J08_001102,B9J08_002792,B9J08_002929,B9J08_004578,B9J08_004627,	35.7	2.56	3.45	0.0350308	0.502039	1
GO:0044272	sulfur compound biosynthetic process	61	14	B9J08_000058,B9J08_000174,B9J08_000458,B9J08_000668,B9J08_001205,B9J08_001224,B9J08_001467,B9J08_001605,B9J08_002995,B9J08_003099,B9J08_003217,B9J08_003339,B9J08_004930,B9J08_005307,	23	1.65	1.86	0.0375627	0.522623	1
GO:0015749	monosaccharide transmembrane transport	6	3	B9J08_002566,B9J08_003836,B9J08_005226,	50	3.59	6.2	0.0388407	0.522623	1
GO:0034219	carbohydrate transmembrane transport	6	3	B9J08_002566,B9J08_003836,B9J08_005226,	50	3.59	6.2	0.0388407	0.522623	1
GO:0008645	hexose transmembrane transport	6	3	B9J08_002566,B9J08_003836,B9J08_005226,	50	3.59	6.2	0.0388407	0.522623	1
GO:1904659	glucose transmembrane transport	6	3	B9J08_002566,B9J08_003836,B9J08_005226,	50	3.59	6.2	0.0388407	0.522623	1
GO:0006772	thiamine metabolic process	6	3	B9J08_000668,B9J08_001205,B9J08_003099,	50	3.59	6.2	0.0388407	0.522623	1
GO:0042724	thiamine-containing compound biosynthetic process	6	3	B9J08_000668,B9J08_001205,B9J08_003099,	50	3.59	6.2	0.0388407	0.522623	1
GO:0005978	glycogen biosynthetic process	6	3	B9J08_000997,B9J08_001989,B9J08_002477,	50	3.59	6.2	0.0388407	0.522623	1
GO:1900151	regulation of nuclear-transcribed mRNA catabolic process, deadenylation-dependent decay	6	3	B9J08_000774,B9J08_003288,B9J08_004627,	50	3.59	6.2	0.0388407	0.522623	1
GO:0009133	nucleoside diphosphate biosynthetic process	6	3	B9J08_001345,B9J08_004601,B9J08_004965,	50	3.59	6.2	0.0388407	0.522623	1
GO:0042723	thiamine-containing compound metabolic process	6	3	B9J08_000668,B9J08_001205,B9J08_003099,	50	3.59	6.2	0.0388407	0.522623	1
GO:0009074	aromatic amino acid family catabolic process	10	4	B9J08_002231,B9J08_004155,B9J08_004930,B9J08_005516,	40	2.87	4.14	0.0391573	0.523973	1
GO:0072521	purine-containing compound metabolic process	102	21	B9J08_000075,B9J08_000274,B9J08_000808,B9J08_000816,B9J08_001345,B9J08_001389,B9J08_001860,B9J08_001875,B9J08_002566,B9J08_002855,B9J08_003306,B9J08_003371,B9J08_003632,B9J08_003836,B9J08_003860,B9J08_004309,B9J08_004375,B9J08_004928,B9J08_005078,B9J08_005226,B9J08_005239,	20.6	1.48	1.62	0.0395032	0.525696	1
GO:0042244	spore wall assembly	24	7	B9J08_000614,B9J08_000958,B9J08_000964,B9J08_001034,B9J08_001269,B9J08_002053,B9J08_005403,	29.2	2.09	2.56	0.040114	0.528022	1
GO:0030476	ascospore wall assembly	24	7	B9J08_000614,B9J08_000958,B9J08_000964,B9J08_001034,B9J08_001269,B9J08_002053,B9J08_005403,	29.2	2.09	2.56	0.040114	0.528022	1
GO:0090502	RNA phosphodiester bond hydrolysis, endonucleolytic	56	13	B9J08_000120,B9J08_000998,B9J08_001674,B9J08_002135,B9J08_002615,B9J08_003127,B9J08_003273,B9J08_004014,B9J08_004502,B9J08_004574,B9J08_004826,B9J08_005253,B9J08_005324,	23.2	1.67	1.89	0.0405828	0.530454	1
GO:0046165	alcohol biosynthetic process	45	11	B9J08_000261,B9J08_000920,B9J08_001205,B9J08_001389,B9J08_002231,B9J08_002762,B9J08_003099,B9J08_003737,B9J08_004709,B9J08_004930,B9J08_004943,	24.4	1.75	2.02	0.0407368	0.530454	1
GO:0022618	ribonucleoprotein complex assembly	121	24	B9J08_000064,B9J08_000254,B9J08_000286,B9J08_000333,B9J08_000554,B9J08_000605,B9J08_000632,B9J08_000711,B9J08_001062,B9J08_001877,B9J08_001915,B9J08_002339,B9J08_002601,B9J08_002921,B9J08_003023,B9J08_003288,B9J08_003432,B9J08_003894,B9J08_004918,B9J08_004958,B9J08_005099,B9J08_005324,B9J08_005336,B9J08_005385,	19.8	1.42	1.55	0.043265	0.539213	1
GO:1901615	organic hydroxy compound metabolic process	103	21	B9J08_000058,B9J08_000073,B9J08_000261,B9J08_000446,B9J08_000668,B9J08_000682,B9J08_000920,B9J08_001205,B9J08_001206,B9J08_001389,B9J08_002231,B9J08_002762,B9J08_002780,B9J08_002807,B9J08_003099,B9J08_003408,B9J08_003737,B9J08_004380,B9J08_004709,B9J08_004930,B9J08_004943,	20.4	1.46	1.6	0.0433952	0.539213	1
GO:0016072	rRNA metabolic process	221	40	B9J08_000082,B9J08_000102,B9J08_000107,B9J08_000120,B9J08_000203,B9J08_000233,B9J08_000605,B9J08_000632,B9J08_000771,B9J08_000910,B9J08_000998,B9J08_001674,B9J08_001803,B9J08_001870,B9J08_001915,B9J08_002135,B9J08_002277,B9J08_002339,B9J08_002615,B9J08_002719,B9J08_002746,B9J08_002921,B9J08_002961,B9J08_003023,B9J08_003031,B9J08_003089,B9J08_003124,B9J08_003127,B9J08_003248,B9J08_003273,B9J08_003…	18.1	1.3	1.39	0.0449367	0.539213	1
GO:0032505	reproduction of a single-celled organism	134	26	B9J08_000444,B9J08_000458,B9J08_000614,B9J08_000822,B9J08_000958,B9J08_000964,B9J08_001034,B9J08_001102,B9J08_001269,B9J08_001356,B9J08_002053,B9J08_002069,B9J08_002536,B9J08_002814,B9J08_002929,B9J08_002977,B9J08_002984,B9J08_004028,B9J08_004578,B9J08_004947,B9J08_005003,B9J08_005205,B9J08_005249,B9J08_005403,B9J08_005405,B9J08_005515,	19.4	1.39	1.51	0.0463052	0.539213	1
GO:0006221	pyrimidine nucleotide biosynthetic process	15	5	B9J08_000816,B9J08_002078,B9J08_002742,B9J08_004601,B9J08_004965,	33.3	2.39	3.11	0.0467016	0.539213	1
GO:0006220	pyrimidine nucleotide metabolic process	15	5	B9J08_000816,B9J08_002078,B9J08_002742,B9J08_004601,B9J08_004965,	33.3	2.39	3.11	0.0467016	0.539213	1
GO:0051101	regulation of DNA binding	15	5	B9J08_002929,B9J08_002977,B9J08_003216,B9J08_004237,B9J08_004578,	33.3	2.39	3.11	0.0467016	0.539213	1
GO:0044282	small molecule catabolic process	98	20	B9J08_000682,B9J08_000776,B9J08_001875,B9J08_001889,B9J08_002078,B9J08_002231,B9J08_002453,B9J08_002457,B9J08_002477,B9J08_002688,B9J08_002780,B9J08_002891,B9J08_003105,B9J08_003231,B9J08_003632,B9J08_004155,B9J08_004317,B9J08_004380,B9J08_004930,B9J08_005516,	20.4	1.46	1.6	0.0474823	0.539213	1
GO:0044264	cellular polysaccharide metabolic process	30	8	B9J08_000049,B9J08_000964,B9J08_000997,B9J08_001020,B9J08_001989,B9J08_002477,B9J08_003251,B9J08_003291,	26.7	1.91	2.26	0.0478993	0.539213	1
GO:0045005	DNA-dependent DNA replication maintenance of fidelity	30	8	B9J08_000922,B9J08_001220,B9J08_001469,B9J08_001667,B9J08_001693,B9J08_002929,B9J08_003467,B9J08_003896,	26.7	1.91	2.26	0.0478993	0.539213	1
GO:0051098	regulation of binding	30	8	B9J08_001102,B9J08_002792,B9J08_002929,B9J08_002977,B9J08_003216,B9J08_004237,B9J08_004578,B9J08_004627,	26.7	1.91	2.26	0.0478993	0.539213	1
GO:0006555	methionine metabolic process	25	7	B9J08_000174,B9J08_001467,B9J08_002995,B9J08_003217,B9J08_003339,B9J08_004930,B9J08_005307,	28	2.01	2.42	0.049267	0.539213	1
GO:0033692	cellular polysaccharide biosynthetic process	20	6	B9J08_000049,B9J08_000964,B9J08_000997,B9J08_001020,B9J08_001989,B9J08_002477,	30	2.15	2.66	0.0492683	0.539213	1
GO:0009250	glucan biosynthetic process	20	6	B9J08_000049,B9J08_000964,B9J08_000997,B9J08_001020,B9J08_001989,B9J08_002477,	30	2.15	2.66	0.0492683	0.539213	1
Molecular function
ID	Name	Bgd count	Result count	Result gene list	Pct of bgd	Fold enrichment	Odds ratio	P-value	Benjamini	Bonferroni
GO:0003735	structural constituent of ribosome	152	99	B9J08_000064,B9J08_000090,B9J08_000091,B9J08_000107,B9J08_000136,B9J08_000142,B9J08_000185,B9J08_000203,B9J08_000209,B9J08_000217,B9J08_000254,B9J08_000346,B9J08_000461,B9J08_000554,B9J08_000604,B9J08_000605,B9J08_000632,B9J08_000649,B9J08_000711,B9J08_000727,B9J08_000728,B9J08_000734,B9J08_000771,B9J08_000878,B9J08_000955,B9J08_000998,B9J08_001081,B9J08_001128,B9J08_001278,B9J08_001607,B9J08_001…	65.1	4.68	13.43	7.46051e-50	6.22206e-47	6.22206e-47
GO:0005198	structural molecule activity	215	99	B9J08_000064,B9J08_000090,B9J08_000091,B9J08_000107,B9J08_000136,B9J08_000142,B9J08_000185,B9J08_000203,B9J08_000209,B9J08_000217,B9J08_000254,B9J08_000346,B9J08_000461,B9J08_000554,B9J08_000604,B9J08_000605,B9J08_000632,B9J08_000649,B9J08_000711,B9J08_000727,B9J08_000728,B9J08_000734,B9J08_000771,B9J08_000878,B9J08_000955,B9J08_000998,B9J08_001081,B9J08_001128,B9J08_001278,B9J08_001607,B9J08_001…	46	3.31	6.04	9.45979e-32	3.94473e-29	7.88946e-29
GO:0022857	transmembrane transporter activity	357	81	B9J08_000002,B9J08_000034,B9J08_000164,B9J08_000170,B9J08_000172,B9J08_000175,B9J08_000342,B9J08_000368,B9J08_000434,B9J08_000435,B9J08_000677,B9J08_000739,B9J08_000756,B9J08_000796,B9J08_000853,B9J08_000995,B9J08_001017,B9J08_001070,B9J08_001162,B9J08_001464,B9J08_001523,B9J08_001530,B9J08_001567,B9J08_001581,B9J08_001856,B9J08_001889,B9J08_002006,B9J08_002079,B9J08_002080,B9J08_002239,B9J08_002…	22.7	1.63	1.93	2.10304e-06	0.000584645	0.00175393
GO:0005215	transporter activity	381	84	B9J08_000002,B9J08_000034,B9J08_000164,B9J08_000170,B9J08_000172,B9J08_000175,B9J08_000342,B9J08_000368,B9J08_000434,B9J08_000435,B9J08_000444,B9J08_000677,B9J08_000739,B9J08_000756,B9J08_000796,B9J08_000853,B9J08_000995,B9J08_001017,B9J08_001070,B9J08_001162,B9J08_001464,B9J08_001523,B9J08_001530,B9J08_001567,B9J08_001581,B9J08_001856,B9J08_001889,B9J08_002006,B9J08_002079,B9J08_002080,B9J08_002…	22	1.58	1.86	4.58998e-06	0.000957012	0.00382805
GO:0016491	oxidoreductase activity	360	75	B9J08_000008,B9J08_000075,B9J08_000144,B9J08_000169,B9J08_000229,B9J08_000261,B9J08_000418,B9J08_000465,B9J08_000645,B9J08_000701,B9J08_000740,B9J08_000850,B9J08_000854,B9J08_000920,B9J08_001135,B9J08_001161,B9J08_001171,B9J08_001224,B9J08_001281,B9J08_001365,B9J08_001450,B9J08_001535,B9J08_001571,B9J08_001744,B9J08_001759,B9J08_001863,B9J08_002245,B9J08_002360,B9J08_002366,B9J08_002408,B9J08_002…	20.8	1.5	1.71	0.000119548	0.0199406	0.0997029
GO:0003723	RNA binding	411	83	B9J08_000107,B9J08_000203,B9J08_000233,B9J08_000346,B9J08_000554,B9J08_000605,B9J08_000651,B9J08_000711,B9J08_000727,B9J08_000774,B9J08_000910,B9J08_000955,B9J08_000975,B9J08_001062,B9J08_001087,B9J08_001105,B9J08_001278,B9J08_001420,B9J08_001561,B9J08_001607,B9J08_001686,B9J08_001708,B9J08_001803,B9J08_001851,B9J08_001870,B9J08_001877,B9J08_001917,B9J08_001922,B9J08_001974,B9J08_002062,B9J08_002…	20.2	1.45	1.65	0.000157489	0.021891	0.131346
GO:0003674	molecular function	3881	568	B9J08_000002,B9J08_000008,B9J08_000013,B9J08_000034,B9J08_000035,B9J08_000054,B9J08_000058,B9J08_000060,B9J08_000064,B9J08_000075,B9J08_000082,B9J08_000090,B9J08_000091,B9J08_000102,B9J08_000107,B9J08_000120,B9J08_000136,B9J08_000142,B9J08_000144,B9J08_000164,B9J08_000169,B9J08_000170,B9J08_000172,B9J08_000174,B9J08_000175,B9J08_000185,B9J08_000203,B9J08_000206,B9J08_000209,B9J08_000217,B9J08_000…	14.6	1.05	1.46	0.00100122	0.119288	0.835015
GO:0019843	rRNA binding	48	15	B9J08_000203,B9J08_000233,B9J08_000554,B9J08_000605,B9J08_000711,B9J08_001062,B9J08_001686,B9J08_001870,B9J08_002367,B9J08_003031,B9J08_003582,B9J08_004990,B9J08_005099,B9J08_005253,B9J08_005362,	31.3	2.24	2.85	0.00155341	0.161943	1
GO:0019202	amino acid kinase activity	3	3	B9J08_001447,B9J08_003217,B9J08_004124,	100	7.18	inf	0.00269329	0.249578	1
GO:0015291	secondary active transmembrane transporter activity	42	13	B9J08_000434,B9J08_000677,B9J08_000756,B9J08_000995,B9J08_001464,B9J08_001567,B9J08_001889,B9J08_002715,B9J08_002902,B9J08_002974,B9J08_004038,B9J08_004591,B9J08_004944,	31	2.22	2.81	0.00345837	0.288428	1
GO:0016868	intramolecular transferase activity, phosphotransferases	6	4	B9J08_002477,B9J08_002512,B9J08_003371,B9J08_004375,	66.7	4.79	12.43	0.00443465	0.336227	1
GO:0017116	single-stranded DNA helicase activity	10	5	B9J08_001105,B9J08_003467,B9J08_005258,B9J08_005376,B9J08_005476,	50	3.59	6.22	0.00710608	0.361546	1
GO:0036094	small molecule binding	808	135	B9J08_000075,B9J08_000082,B9J08_000102,B9J08_000144,B9J08_000164,B9J08_000169,B9J08_000174,B9J08_000175,B9J08_000229,B9J08_000261,B9J08_000290,B9J08_000435,B9J08_000458,B9J08_000483,B9J08_000554,B9J08_000651,B9J08_000668,B9J08_000686,B9J08_000740,B9J08_000766,B9J08_000774,B9J08_000816,B9J08_000822,B9J08_000854,B9J08_000910,B9J08_000944,B9J08_000975,B9J08_001062,B9J08_001102,B9J08_001105,B9J08_001…	16.7	1.2	1.3	0.00798099	0.361546	1
GO:0016667	oxidoreductase activity, acting on a sulfur group of donors	27	9	B9J08_000169,B9J08_001224,B9J08_001365,B9J08_002360,B9J08_003261,B9J08_003339,B9J08_003552,B9J08_003819,B9J08_005307,	33.3	2.39	3.12	0.00842349	0.361546	1
GO:0008509	anion transmembrane transporter activity	67	17	B9J08_000034,B9J08_000342,B9J08_000434,B9J08_000677,B9J08_000995,B9J08_001464,B9J08_001530,B9J08_001567,B9J08_002280,B9J08_002715,B9J08_002901,B9J08_002902,B9J08_002974,B9J08_004038,B9J08_004591,B9J08_004592,B9J08_004735,	25.4	1.82	2.13	0.00868077	0.361546	1
GO:0048029	monosaccharide binding	7	4	B9J08_002566,B9J08_003216,B9J08_003836,B9J08_005226,	57.1	4.1	8.28	0.00921204	0.361546	1
GO:0016653	oxidoreductase activity, acting on NAD(P)H, heme protein as acceptor	7	4	B9J08_001863,B9J08_003329,B9J08_004497,B9J08_004709,	57.1	4.1	8.28	0.00921204	0.361546	1
GO:0016774	phosphotransferase activity, carboxyl group as acceptor	4	3	B9J08_001860,B9J08_003217,B9J08_004124,	75	5.38	18.61	0.00965196	0.361546	1
GO:0016597	amino acid binding	4	3	B9J08_002078,B9J08_003217,B9J08_004798,	75	5.38	18.61	0.00965196	0.361546	1
GO:0005536	glucose binding	4	3	B9J08_002566,B9J08_003836,B9J08_005226,	75	5.38	18.61	0.00965196	0.361546	1
GO:0004396	hexokinase activity	4	3	B9J08_002566,B9J08_003836,B9J08_005226,	75	5.38	18.61	0.00965196	0.361546	1
GO:0015075	ion transmembrane transporter activity	176	36	B9J08_000034,B9J08_000170,B9J08_000175,B9J08_000342,B9J08_000434,B9J08_000435,B9J08_000677,B9J08_000756,B9J08_000995,B9J08_001162,B9J08_001464,B9J08_001530,B9J08_001567,B9J08_001581,B9J08_001856,B9J08_001889,B9J08_002080,B9J08_002280,B9J08_002630,B9J08_002715,B9J08_002795,B9J08_002831,B9J08_002855,B9J08_002901,B9J08_002902,B9J08_002974,B9J08_003002,B9J08_003341,B9J08_004038,B9J08_004344,B9J08_004…	20.5	1.47	1.62	0.0097404	0.361546	1
GO:0010181	FMN binding	19	7	B9J08_000854,B9J08_001224,B9J08_001535,B9J08_002408,B9J08_003329,B9J08_004709,B9J08_004840,	36.8	2.64	3.63	0.010865	0.361546	1
GO:1901363	heterocyclic compound binding	1488	233	B9J08_000002,B9J08_000075,B9J08_000082,B9J08_000102,B9J08_000107,B9J08_000144,B9J08_000164,B9J08_000169,B9J08_000174,B9J08_000175,B9J08_000203,B9J08_000229,B9J08_000233,B9J08_000261,B9J08_000270,B9J08_000274,B9J08_000290,B9J08_000346,B9J08_000435,B9J08_000447,B9J08_000458,B9J08_000467,B9J08_000483,B9J08_000554,B9J08_000605,B9J08_000651,B9J08_000668,B9J08_000686,B9J08_000711,B9J08_000727,B9J08_000…	15.7	1.12	1.23	0.0116407	0.361546	1
GO:0050660	flavin adenine dinucleotide binding	38	11	B9J08_000261,B9J08_001281,B9J08_001365,B9J08_002691,B9J08_002780,B9J08_003329,B9J08_003819,B9J08_004709,B9J08_004986,B9J08_005061,B9J08_005171,	28.9	2.08	2.54	0.0119523	0.361546	1
GO:0016705	oxidoreductase activity, acting on paired donors, with incorporation or reduction of molecular oxygen	43	12	B9J08_000261,B9J08_001135,B9J08_001281,B9J08_002419,B9J08_002536,B9J08_002691,B9J08_003216,B9J08_003737,B9J08_004152,B9J08_004986,B9J08_005171,B9J08_005548,	27.9	2	2.42	0.0119886	0.361546	1
GO:1901265	nucleoside phosphate binding	746	124	B9J08_000075,B9J08_000082,B9J08_000102,B9J08_000144,B9J08_000164,B9J08_000169,B9J08_000175,B9J08_000229,B9J08_000261,B9J08_000290,B9J08_000435,B9J08_000458,B9J08_000483,B9J08_000554,B9J08_000651,B9J08_000668,B9J08_000686,B9J08_000740,B9J08_000774,B9J08_000816,B9J08_000822,B9J08_000854,B9J08_000910,B9J08_000944,B9J08_000975,B9J08_001062,B9J08_001102,B9J08_001105,B9J08_001160,B9J08_001205,B9J08_001…	16.6	1.19	1.29	0.013153	0.361546	1
GO:0000166	nucleotide binding	746	124	B9J08_000075,B9J08_000082,B9J08_000102,B9J08_000144,B9J08_000164,B9J08_000169,B9J08_000175,B9J08_000229,B9J08_000261,B9J08_000290,B9J08_000435,B9J08_000458,B9J08_000483,B9J08_000554,B9J08_000651,B9J08_000668,B9J08_000686,B9J08_000740,B9J08_000774,B9J08_000816,B9J08_000822,B9J08_000854,B9J08_000910,B9J08_000944,B9J08_000975,B9J08_001062,B9J08_001102,B9J08_001105,B9J08_001160,B9J08_001205,B9J08_001…	16.6	1.19	1.29	0.013153	0.361546	1
GO:0097159	organic cyclic compound binding	1496	233	B9J08_000002,B9J08_000075,B9J08_000082,B9J08_000102,B9J08_000107,B9J08_000144,B9J08_000164,B9J08_000169,B9J08_000174,B9J08_000175,B9J08_000203,B9J08_000229,B9J08_000233,B9J08_000261,B9J08_000270,B9J08_000274,B9J08_000290,B9J08_000346,B9J08_000435,B9J08_000447,B9J08_000458,B9J08_000467,B9J08_000483,B9J08_000554,B9J08_000605,B9J08_000651,B9J08_000668,B9J08_000686,B9J08_000711,B9J08_000727,B9J08_000…	15.6	1.12	1.22	0.0151388	0.361546	1
GO:0043177	organic acid binding	8	4	B9J08_002078,B9J08_003216,B9J08_003217,B9J08_004798,	50	3.59	6.21	0.0164131	0.361546	1
GO:0015294	solute:cation symporter activity	12	5	B9J08_000677,B9J08_000756,B9J08_001464,B9J08_002902,B9J08_002974,	41.7	2.99	4.44	0.0175737	0.361546	1
GO:0015293	symporter activity	12	5	B9J08_000677,B9J08_000756,B9J08_001464,B9J08_002902,B9J08_002974,	41.7	2.99	4.44	0.0175737	0.361546	1
GO:0043168	anion binding	714	118	B9J08_000082,B9J08_000102,B9J08_000164,B9J08_000169,B9J08_000174,B9J08_000175,B9J08_000261,B9J08_000290,B9J08_000435,B9J08_000458,B9J08_000483,B9J08_000651,B9J08_000668,B9J08_000686,B9J08_000766,B9J08_000816,B9J08_000822,B9J08_000854,B9J08_000910,B9J08_000975,B9J08_001062,B9J08_001102,B9J08_001105,B9J08_001160,B9J08_001181,B9J08_001205,B9J08_001224,B9J08_001281,B9J08_001344,B9J08_001345,B9J08_001…	16.5	1.19	1.27	0.0185171	0.361546	1
GO:0051018	protein kinase A binding	2	2	B9J08_000774,B9J08_001974,	100	7.18	inf	0.0193834	0.361546	1
GO:0004619	phosphoglycerate mutase activity	2	2	B9J08_003371,B9J08_004375,	100	7.18	inf	0.0193834	0.361546	1
GO:0016002	sulfite reductase activity	2	2	B9J08_001224,B9J08_003552,	100	7.18	inf	0.0193834	0.361546	1
GO:0004783	sulfite reductase (NADPH) activity	2	2	B9J08_001224,B9J08_003552,	100	7.18	inf	0.0193834	0.361546	1
GO:0051063	CDP reductase activity	2	2	B9J08_004601,B9J08_004965,	100	7.18	inf	0.0193834	0.361546	1
GO:0034236	protein kinase A catalytic subunit binding	2	2	B9J08_000774,B9J08_001974,	100	7.18	inf	0.0193834	0.361546	1
GO:0003843	1,3-beta-D-glucan synthase activity	2	2	B9J08_000964,B9J08_001020,	100	7.18	inf	0.0193834	0.361546	1
GO:0003958	NADPH-hemoprotein reductase activity	2	2	B9J08_003329,B9J08_004709,	100	7.18	inf	0.0193834	0.361546	1
GO:0003872	6-phosphofructokinase activity	2	2	B9J08_004309,B9J08_004928,	100	7.18	inf	0.0193834	0.361546	1
GO:0016743	carboxyl- or carbamoyltransferase activity	2	2	B9J08_002078,B9J08_004798,	100	7.18	inf	0.0193834	0.361546	1
GO:1990593	nascent polypeptide-associated complex binding	2	2	B9J08_002233,B9J08_004989,	100	7.18	inf	0.0193834	0.361546	1
GO:0034318	alcohol O-acyltransferase activity	5	3	B9J08_000776,B9J08_001206,B9J08_003408,	60	4.31	9.31	0.0216377	0.361546	1
GO:1901618	organic hydroxy compound transmembrane transporter activity	5	3	B9J08_000172,B9J08_000677,B9J08_003981,	60	4.31	9.31	0.0216377	0.361546	1
GO:0008525	phosphatidylcholine transporter activity	5	3	B9J08_000435,B9J08_000444,B9J08_004344,	60	4.31	9.31	0.0216377	0.361546	1
GO:0005506	iron ion binding	47	12	B9J08_001224,B9J08_001759,B9J08_002536,B9J08_002691,B9J08_002960,B9J08_003099,B9J08_003216,B9J08_003329,B9J08_003737,B9J08_004709,B9J08_004986,B9J08_005548,	25.5	1.83	2.14	0.0242139	0.361546	1
GO:0019200	carbohydrate kinase activity	13	5	B9J08_002566,B9J08_003836,B9J08_004309,B9J08_004928,B9J08_005226,	38.5	2.76	3.88	0.0253525	0.361546	1
GO:0015205	nucleobase transmembrane transporter activity	9	4	B9J08_000756,B9J08_002435,B9J08_003017,B9J08_004513,	44.4	3.19	4.97	0.0263368	0.361546	1
GO:0030554	adenyl nucleotide binding	497	84	B9J08_000102,B9J08_000164,B9J08_000169,B9J08_000175,B9J08_000290,B9J08_000435,B9J08_000458,B9J08_000483,B9J08_000651,B9J08_000668,B9J08_000686,B9J08_000816,B9J08_000822,B9J08_000975,B9J08_001062,B9J08_001105,B9J08_001160,B9J08_001205,B9J08_001344,B9J08_001345,B9J08_001389,B9J08_001447,B9J08_001467,B9J08_001581,B9J08_001824,B9J08_001859,B9J08_001860,B9J08_001910,B9J08_001972,B9J08_001999,B9J08_002…	16.9	1.21	1.29	0.0273737	0.361546	1
GO:0016860	intramolecular oxidoreductase activity	18	6	B9J08_000808,B9J08_001365,B9J08_001875,B9J08_003261,B9J08_003837,B9J08_004943,	33.3	2.39	3.11	0.0300561	0.361546	1
GO:0008514	organic anion transmembrane transporter activity	49	12	B9J08_000034,B9J08_000342,B9J08_000434,B9J08_001530,B9J08_001567,B9J08_002280,B9J08_002901,B9J08_002974,B9J08_004038,B9J08_004591,B9J08_004592,B9J08_004735,	24.5	1.76	2.02	0.0329635	0.361546	1
GO:0090079	translation regulator activity, nucleic acid binding	60	14	B9J08_001087,B9J08_001561,B9J08_001877,B9J08_001917,B9J08_002813,B9J08_003238,B9J08_003432,B9J08_003433,B9J08_003894,B9J08_004356,B9J08_004579,B9J08_005387,B9J08_005585,B9J08_005586,	23.3	1.67	1.9	0.0329979	0.361546	1
GO:0005524	ATP binding	489	82	B9J08_000102,B9J08_000164,B9J08_000169,B9J08_000175,B9J08_000290,B9J08_000435,B9J08_000458,B9J08_000483,B9J08_000651,B9J08_000668,B9J08_000686,B9J08_000816,B9J08_000822,B9J08_000975,B9J08_001062,B9J08_001105,B9J08_001160,B9J08_001205,B9J08_001344,B9J08_001345,B9J08_001389,B9J08_001447,B9J08_001467,B9J08_001581,B9J08_001824,B9J08_001860,B9J08_001910,B9J08_001972,B9J08_001999,B9J08_002053,B9J08_002…	16.8	1.2	1.28	0.0345984	0.361546	1
GO:0016853	isomerase activity	66	15	B9J08_000411,B9J08_000808,B9J08_000944,B9J08_001365,B9J08_001875,B9J08_002360,B9J08_002477,B9J08_002512,B9J08_002762,B9J08_003261,B9J08_003371,B9J08_003440,B9J08_003837,B9J08_004375,B9J08_004943,	22.7	1.63	1.84	0.0347204	0.361546	1
GO:0003746	translation elongation factor activity	14	5	B9J08_001917,B9J08_002813,B9J08_003238,B9J08_004579,B9J08_005387,	35.7	2.56	3.45	0.0350308	0.361546	1
GO:0000774	adenyl-nucleotide exchange factor activity	6	3	B9J08_001859,B9J08_001910,B9J08_005000,	50	3.59	6.2	0.0388407	0.361546	1
GO:0060590	ATPase regulator activity	6	3	B9J08_001859,B9J08_001910,B9J08_005000,	50	3.59	6.2	0.0388407	0.361546	1
GO:0070181	small ribosomal subunit rRNA binding	6	3	B9J08_000605,B9J08_001870,B9J08_004990,	50	3.59	6.2	0.0388407	0.361546	1
GO:0016668	oxidoreductase activity, acting on a sulfur group of donors, NAD(P) as acceptor	6	3	B9J08_001224,B9J08_003552,B9J08_003819,	50	3.59	6.2	0.0388407	0.361546	1
GO:0019901	protein kinase binding	19	6	B9J08_000263,B9J08_000774,B9J08_001974,B9J08_002932,B9J08_003589,B9J08_005458,	31.6	2.27	2.87	0.0389135	0.361546	1
GO:0019900	kinase binding	19	6	B9J08_000263,B9J08_000774,B9J08_001974,B9J08_002932,B9J08_003589,B9J08_005458,	31.6	2.27	2.87	0.0389135	0.361546	1
GO:0045182	translation regulator activity	67	15	B9J08_001087,B9J08_001561,B9J08_001877,B9J08_001917,B9J08_002813,B9J08_003238,B9J08_003432,B9J08_003433,B9J08_003894,B9J08_004143,B9J08_004356,B9J08_004579,B9J08_005387,B9J08_005585,B9J08_005586,	22.4	1.61	1.8	0.0392164	0.361546	1
GO:0022853	active ion transmembrane transporter activity	73	16	B9J08_000175,B9J08_000434,B9J08_000435,B9J08_000677,B9J08_000756,B9J08_000995,B9J08_001464,B9J08_001567,B9J08_001581,B9J08_001889,B9J08_002715,B9J08_002855,B9J08_002902,B9J08_002974,B9J08_004344,B9J08_004591,	21.9	1.57	1.75	0.0405228	0.361546	1
GO:0032559	adenyl ribonucleotide binding	493	82	B9J08_000102,B9J08_000164,B9J08_000169,B9J08_000175,B9J08_000290,B9J08_000435,B9J08_000458,B9J08_000483,B9J08_000651,B9J08_000668,B9J08_000686,B9J08_000816,B9J08_000822,B9J08_000975,B9J08_001062,B9J08_001105,B9J08_001160,B9J08_001205,B9J08_001344,B9J08_001345,B9J08_001389,B9J08_001447,B9J08_001467,B9J08_001581,B9J08_001824,B9J08_001860,B9J08_001910,B9J08_001972,B9J08_001999,B9J08_002053,B9J08_002…	16.6	1.19	1.27	0.0411474	0.361546	1
GO:0097367	carbohydrate derivative binding	608	99	B9J08_000082,B9J08_000102,B9J08_000164,B9J08_000169,B9J08_000175,B9J08_000290,B9J08_000435,B9J08_000458,B9J08_000483,B9J08_000651,B9J08_000668,B9J08_000686,B9J08_000816,B9J08_000822,B9J08_000854,B9J08_000910,B9J08_000975,B9J08_001062,B9J08_001102,B9J08_001105,B9J08_001160,B9J08_001205,B9J08_001224,B9J08_001344,B9J08_001345,B9J08_001389,B9J08_001447,B9J08_001467,B9J08_001535,B9J08_001561,B9J08_001…	16.3	1.17	1.24	0.0434772	0.361546	1
GO:0008135	translation factor activity, RNA binding	57	13	B9J08_001561,B9J08_001877,B9J08_001917,B9J08_002813,B9J08_003238,B9J08_003432,B9J08_003433,B9J08_003894,B9J08_004356,B9J08_004579,B9J08_005387,B9J08_005585,B9J08_005586,	22.8	1.64	1.84	0.0461562	0.361546	1
GO:0016301	kinase activity	190	35	B9J08_000290,B9J08_000458,B9J08_000668,B9J08_000816,B9J08_000822,B9J08_001160,B9J08_001205,B9J08_001344,B9J08_001345,B9J08_001389,B9J08_001447,B9J08_001824,B9J08_001860,B9J08_002053,B9J08_002445,B9J08_002566,B9J08_002669,B9J08_002792,B9J08_002977,B9J08_002995,B9J08_003217,B9J08_003632,B9J08_003836,B9J08_003937,B9J08_004028,B9J08_004124,B9J08_004309,B9J08_004380,B9J08_004601,B9J08_004785,B9J08_004…	18.4	1.32	1.42	0.0466599	0.361546	1
GO:0015103	inorganic anion transmembrane transporter activity	15	5	B9J08_000034,B9J08_000677,B9J08_000995,B9J08_002715,B9J08_002902,	33.3	2.39	3.11	0.0467016	0.361546	1
GO:0034061	DNA polymerase activity	15	5	B9J08_001667,B9J08_001693,B9J08_003155,B9J08_004896,B9J08_005515,	33.3	2.39	3.11	0.0467016	0.361546	1
GO:0016763	pentosyltransferase activity	15	5	B9J08_003099,B9J08_003783,B9J08_003860,B9J08_004076,B9J08_004809,	33.3	2.39	3.11	0.0467016	0.361546	1
GO:0030246	carbohydrate binding	20	6	B9J08_002566,B9J08_003211,B9J08_003216,B9J08_003397,B9J08_003836,B9J08_005226,	30	2.15	2.66	0.0492683	0.361546	1
Cellular component
ID	Name	Bgd count	Result count	Result gene list	Pct of bgd	Fold enrichment	Odds ratio	P-value	Benjamini	Bonferroni
GO:0005840	ribosome	183	109	B9J08_000064,B9J08_000090,B9J08_000091,B9J08_000107,B9J08_000136,B9J08_000142,B9J08_000185,B9J08_000203,B9J08_000209,B9J08_000217,B9J08_000233,B9J08_000254,B9J08_000346,B9J08_000461,B9J08_000554,B9J08_000604,B9J08_000605,B9J08_000632,B9J08_000649,B9J08_000711,B9J08_000727,B9J08_000728,B9J08_000734,B9J08_000771,B9J08_000774,B9J08_000878,B9J08_000955,B9J08_000998,B9J08_001081,B9J08_001087,B9J08_001…	59.6	4.28	10.73	2.72452e-49	1.14975e-46	1.14975e-46
GO:0044391	ribosomal subunit	146	91	B9J08_000064,B9J08_000090,B9J08_000091,B9J08_000107,B9J08_000136,B9J08_000203,B9J08_000209,B9J08_000217,B9J08_000346,B9J08_000554,B9J08_000632,B9J08_000649,B9J08_000711,B9J08_000727,B9J08_000728,B9J08_000734,B9J08_000771,B9J08_000878,B9J08_000955,B9J08_000998,B9J08_001081,B9J08_001087,B9J08_001128,B9J08_001278,B9J08_001607,B9J08_001708,B9J08_001744,B9J08_001851,B9J08_001870,B9J08_001885,B9J08_001…	62.3	4.47	11.72	2.30386e-43	4.86114e-41	9.72228e-41
GO:0022626	cytosolic ribosome	73	61	B9J08_000064,B9J08_000090,B9J08_000091,B9J08_000107,B9J08_000136,B9J08_000203,B9J08_000209,B9J08_000346,B9J08_000554,B9J08_000632,B9J08_000711,B9J08_000727,B9J08_000771,B9J08_000878,B9J08_000955,B9J08_000998,B9J08_001081,B9J08_001278,B9J08_001851,B9J08_001870,B9J08_001885,B9J08_001922,B9J08_001974,B9J08_002277,B9J08_002367,B9J08_002601,B9J08_002718,B9J08_002719,B9J08_002813,B9J08_002921,B9J08_002…	83.6	6	34.54	1.81436e-41	2.5522e-39	7.65661e-39
GO:0022625	cytosolic large ribosomal subunit	44	41	B9J08_000064,B9J08_000090,B9J08_000136,B9J08_000209,B9J08_000346,B9J08_000554,B9J08_000711,B9J08_000727,B9J08_000878,B9J08_000955,B9J08_001081,B9J08_001278,B9J08_001851,B9J08_001885,B9J08_001922,B9J08_002277,B9J08_002367,B9J08_002601,B9J08_002718,B9J08_002719,B9J08_003023,B9J08_003127,B9J08_003249,B9J08_003250,B9J08_003313,B9J08_003393,B9J08_003634,B9J08_003756,B9J08_003919,B9J08_003953,B9J08_004…	93.2	6.69	90.03	2.31847e-32	2.44598e-30	9.78393e-30
GO:0015934	large ribosomal subunit	91	60	B9J08_000064,B9J08_000090,B9J08_000136,B9J08_000209,B9J08_000217,B9J08_000346,B9J08_000554,B9J08_000711,B9J08_000727,B9J08_000728,B9J08_000734,B9J08_000878,B9J08_000955,B9J08_001081,B9J08_001087,B9J08_001128,B9J08_001278,B9J08_001607,B9J08_001708,B9J08_001851,B9J08_001885,B9J08_001922,B9J08_002277,B9J08_002367,B9J08_002601,B9J08_002693,B9J08_002718,B9J08_002719,B9J08_002779,B9J08_002786,B9J08_003…	65.9	4.73	13.07	1.1628e-30	9.81402e-29	4.90701e-28
GO:1990904	ribonucleoprotein complex	406	124	B9J08_000064,B9J08_000090,B9J08_000091,B9J08_000102,B9J08_000107,B9J08_000120,B9J08_000136,B9J08_000185,B9J08_000203,B9J08_000209,B9J08_000217,B9J08_000233,B9J08_000286,B9J08_000333,B9J08_000346,B9J08_000554,B9J08_000605,B9J08_000632,B9J08_000645,B9J08_000649,B9J08_000711,B9J08_000727,B9J08_000728,B9J08_000734,B9J08_000771,B9J08_000774,B9J08_000878,B9J08_000910,B9J08_000955,B9J08_000998,B9J08_001…	30.5	2.19	3.12	6.87265e-20	4.83376e-18	2.90026e-17
GO:0015935	small ribosomal subunit	55	31	B9J08_000091,B9J08_000107,B9J08_000203,B9J08_000632,B9J08_000649,B9J08_000771,B9J08_000998,B9J08_001744,B9J08_001870,B9J08_001974,B9J08_002921,B9J08_002934,B9J08_002947,B9J08_002961,B9J08_003288,B9J08_003384,B9J08_003530,B9J08_003560,B9J08_003677,B9J08_003755,B9J08_003935,B9J08_003975,B9J08_004067,B9J08_004595,B9J08_004761,B9J08_004956,B9J08_004990,B9J08_005012,B9J08_005324,B9J08_005362,B9J08_005…	56.4	4.05	8.33	1.39079e-13	8.38449e-12	5.86914e-11
GO:0022627	cytosolic small ribosomal subunit	24	18	B9J08_000091,B9J08_000107,B9J08_000203,B9J08_000632,B9J08_000771,B9J08_000998,B9J08_001870,B9J08_001974,B9J08_002921,B9J08_002961,B9J08_003288,B9J08_003677,B9J08_004067,B9J08_004761,B9J08_004956,B9J08_004990,B9J08_005324,B9J08_005458,	75	5.38	19.03	1.87608e-11	9.89633e-10	7.91707e-09
GO:0005829	cytosol	372	97	B9J08_000064,B9J08_000090,B9J08_000091,B9J08_000102,B9J08_000107,B9J08_000136,B9J08_000203,B9J08_000209,B9J08_000229,B9J08_000274,B9J08_000346,B9J08_000444,B9J08_000446,B9J08_000554,B9J08_000632,B9J08_000645,B9J08_000686,B9J08_000711,B9J08_000727,B9J08_000740,B9J08_000765,B9J08_000771,B9J08_000816,B9J08_000878,B9J08_000955,B9J08_000998,B9J08_001081,B9J08_001161,B9J08_001205,B9J08_001269,B9J08_001…	26.1	1.87	2.39	6.55685e-11	3.07444e-09	2.76699e-08
GO:0005761	mitochondrial ribosome	78	30	B9J08_000217,B9J08_000649,B9J08_000728,B9J08_000734,B9J08_001128,B9J08_001607,B9J08_001708,B9J08_001744,B9J08_002693,B9J08_002779,B9J08_002786,B9J08_002934,B9J08_002947,B9J08_003274,B9J08_003384,B9J08_003530,B9J08_003560,B9J08_003596,B9J08_003605,B9J08_003711,B9J08_003930,B9J08_003935,B9J08_003975,B9J08_004085,B9J08_004269,B9J08_004595,B9J08_004835,B9J08_005012,B9J08_005046,B9J08_005362,	38.5	2.76	4	5.13997e-08	1.97188e-06	2.16907e-05
GO:0000313	organellar ribosome	78	30	B9J08_000217,B9J08_000649,B9J08_000728,B9J08_000734,B9J08_001128,B9J08_001607,B9J08_001708,B9J08_001744,B9J08_002693,B9J08_002779,B9J08_002786,B9J08_002934,B9J08_002947,B9J08_003274,B9J08_003384,B9J08_003530,B9J08_003560,B9J08_003596,B9J08_003605,B9J08_003711,B9J08_003930,B9J08_003935,B9J08_003975,B9J08_004085,B9J08_004269,B9J08_004595,B9J08_004835,B9J08_005012,B9J08_005046,B9J08_005362,	38.5	2.76	4	5.13997e-08	1.97188e-06	2.16907e-05
GO:0005576	extracellular region	79	28	B9J08_000049,B9J08_000082,B9J08_000434,B9J08_000722,B9J08_000740,B9J08_000816,B9J08_000918,B9J08_001161,B9J08_001686,B9J08_001917,B9J08_002582,B9J08_002688,B9J08_003127,B9J08_003251,B9J08_003273,B9J08_003364,B9J08_003397,B9J08_003437,B9J08_003582,B9J08_003589,B9J08_004067,B9J08_004172,B9J08_004173,B9J08_004175,B9J08_004176,B9J08_004177,B9J08_004579,B9J08_004956,	35.4	2.54	3.5	1.03998e-06	3.65725e-05	0.00043887
GO:0043228	non-membrane-bounded organelle	986	182	B9J08_000064,B9J08_000090,B9J08_000091,B9J08_000102,B9J08_000107,B9J08_000120,B9J08_000136,B9J08_000142,B9J08_000185,B9J08_000203,B9J08_000209,B9J08_000217,B9J08_000233,B9J08_000254,B9J08_000261,B9J08_000286,B9J08_000290,B9J08_000346,B9J08_000458,B9J08_000461,B9J08_000554,B9J08_000604,B9J08_000605,B9J08_000632,B9J08_000649,B9J08_000651,B9J08_000711,B9J08_000727,B9J08_000728,B9J08_000734,B9J08_000…	18.5	1.32	1.55	4.3725e-06	0.0001318	0.00184519
GO:0043232	intracellular non-membrane-bounded organelle	986	182	B9J08_000064,B9J08_000090,B9J08_000091,B9J08_000102,B9J08_000107,B9J08_000120,B9J08_000136,B9J08_000142,B9J08_000185,B9J08_000203,B9J08_000209,B9J08_000217,B9J08_000233,B9J08_000254,B9J08_000261,B9J08_000286,B9J08_000290,B9J08_000346,B9J08_000458,B9J08_000461,B9J08_000554,B9J08_000604,B9J08_000605,B9J08_000632,B9J08_000649,B9J08_000651,B9J08_000711,B9J08_000727,B9J08_000728,B9J08_000734,B9J08_000…	18.5	1.32	1.55	4.3725e-06	0.0001318	0.00184519
GO:0000315	organellar large ribosomal subunit	44	18	B9J08_000217,B9J08_000728,B9J08_000734,B9J08_001128,B9J08_001607,B9J08_001708,B9J08_002693,B9J08_002779,B9J08_002786,B9J08_003274,B9J08_003596,B9J08_003605,B9J08_003711,B9J08_003930,B9J08_004085,B9J08_004269,B9J08_004835,B9J08_005046,	40.9	2.94	4.37	9.20658e-06	0.000242824	0.00388518
GO:0005762	mitochondrial large ribosomal subunit	44	18	B9J08_000217,B9J08_000728,B9J08_000734,B9J08_001128,B9J08_001607,B9J08_001708,B9J08_002693,B9J08_002779,B9J08_002786,B9J08_003274,B9J08_003596,B9J08_003605,B9J08_003711,B9J08_003930,B9J08_004085,B9J08_004269,B9J08_004835,B9J08_005046,	40.9	2.94	4.37	9.20658e-06	0.000242824	0.00388518
GO:0005759	mitochondrial matrix	175	45	B9J08_000217,B9J08_000425,B9J08_000445,B9J08_000649,B9J08_000728,B9J08_000734,B9J08_001062,B9J08_001128,B9J08_001345,B9J08_001561,B9J08_001607,B9J08_001708,B9J08_001744,B9J08_002453,B9J08_002691,B9J08_002693,B9J08_002779,B9J08_002780,B9J08_002786,B9J08_002934,B9J08_002947,B9J08_003274,B9J08_003330,B9J08_003384,B9J08_003440,B9J08_003530,B9J08_003560,B9J08_003596,B9J08_003605,B9J08_003711,B9J08_003…	25.7	1.85	2.22	1.81335e-05	0.000450136	0.00765232
GO:0005658	alpha DNA polymerase:primase complex	4	4	B9J08_001474,B9J08_002225,B9J08_003155,B9J08_005515,	100	7.18	inf	0.000373732	0.00795637	0.157715
GO:0000314	organellar small ribosomal subunit	30	12	B9J08_000649,B9J08_001744,B9J08_002934,B9J08_002947,B9J08_003384,B9J08_003530,B9J08_003560,B9J08_003935,B9J08_003975,B9J08_004595,B9J08_005012,B9J08_005362,	40	2.87	4.18	0.000377079	0.00795637	0.159127
GO:0005763	mitochondrial small ribosomal subunit	30	12	B9J08_000649,B9J08_001744,B9J08_002934,B9J08_002947,B9J08_003384,B9J08_003530,B9J08_003560,B9J08_003935,B9J08_003975,B9J08_004595,B9J08_005012,B9J08_005362,	40	2.87	4.18	0.000377079	0.00795637	0.159127
GO:0005886	plasma membrane	224	48	B9J08_000002,B9J08_000164,B9J08_000170,B9J08_000172,B9J08_000220,B9J08_000435,B9J08_000614,B9J08_000677,B9J08_000756,B9J08_000918,B9J08_000958,B9J08_000964,B9J08_000995,B9J08_001020,B9J08_001102,B9J08_001162,B9J08_001450,B9J08_001464,B9J08_001530,B9J08_001567,B9J08_001856,B9J08_002069,B9J08_002080,B9J08_002102,B9J08_002280,B9J08_002389,B9J08_002435,B9J08_002582,B9J08_002715,B9J08_002795,B9J08_002…	21.4	1.54	1.74	0.00111039	0.0223135	0.468583
GO:0030684	preribosome	125	29	B9J08_000120,B9J08_000185,B9J08_000203,B9J08_000233,B9J08_000286,B9J08_000554,B9J08_000605,B9J08_000771,B9J08_000910,B9J08_001087,B9J08_001674,B9J08_001803,B9J08_001915,B9J08_001974,B9J08_002135,B9J08_002277,B9J08_002321,B9J08_002339,B9J08_002615,B9J08_002746,B9J08_003031,B9J08_003124,B9J08_003127,B9J08_004014,B9J08_004502,B9J08_004826,B9J08_004990,B9J08_005003,B9J08_005253,	23.2	1.67	1.91	0.00315584	0.0605348	1
GO:0005657	replication fork	53	15	B9J08_001105,B9J08_001220,B9J08_001469,B9J08_001474,B9J08_001587,B9J08_001693,B9J08_002225,B9J08_002929,B9J08_003155,B9J08_003338,B9J08_003467,B9J08_003896,B9J08_004578,B9J08_005476,B9J08_005515,	28.3	2.03	2.47	0.00454402	0.083373	1
GO:0042575	DNA polymerase complex	13	6	B9J08_001474,B9J08_001667,B9J08_001693,B9J08_002225,B9J08_003155,B9J08_005515,	46.2	3.31	5.34	0.0051277	0.0901621	1
GO:0043596	nuclear replication fork	40	12	B9J08_001105,B9J08_001220,B9J08_001469,B9J08_001474,B9J08_001587,B9J08_002225,B9J08_002929,B9J08_003155,B9J08_003467,B9J08_003896,B9J08_005476,B9J08_005515,	30	2.15	2.68	0.00647579	0.109311	1
GO:0005739	mitochondrion	601	103	B9J08_000034,B9J08_000073,B9J08_000217,B9J08_000274,B9J08_000342,B9J08_000425,B9J08_000434,B9J08_000445,B9J08_000635,B9J08_000649,B9J08_000728,B9J08_000734,B9J08_000739,B9J08_000808,B9J08_000816,B9J08_000850,B9J08_000944,B9J08_000951,B9J08_000992,B9J08_001062,B9J08_001128,B9J08_001281,B9J08_001345,B9J08_001351,B9J08_001561,B9J08_001607,B9J08_001708,B9J08_001744,B9J08_001860,B9J08_001863,B9J08_001…	17.1	1.23	1.33	0.010122	0.164288	1
GO:0098798	mitochondrial protein-containing complex	166	34	B9J08_000217,B9J08_000649,B9J08_000728,B9J08_000734,B9J08_000739,B9J08_001128,B9J08_001607,B9J08_001708,B9J08_001744,B9J08_002693,B9J08_002779,B9J08_002786,B9J08_002934,B9J08_002947,B9J08_003274,B9J08_003384,B9J08_003530,B9J08_003560,B9J08_003596,B9J08_003605,B9J08_003711,B9J08_003930,B9J08_003935,B9J08_003975,B9J08_004085,B9J08_004269,B9J08_004595,B9J08_004835,B9J08_005012,B9J08_005023,B9J08_005…	20.5	1.47	1.62	0.0115735	0.17816	1
GO:0030687	preribosome, large subunit precursor	48	13	B9J08_000233,B9J08_000286,B9J08_000554,B9J08_000910,B9J08_001087,B9J08_001915,B9J08_002277,B9J08_002321,B9J08_002339,B9J08_003031,B9J08_003124,B9J08_003127,B9J08_005253,	27.1	1.94	2.32	0.011821	0.17816	1
GO:0031224	intrinsic component of membrane	1070	171	B9J08_000002,B9J08_000008,B9J08_000034,B9J08_000072,B9J08_000073,B9J08_000164,B9J08_000170,B9J08_000172,B9J08_000175,B9J08_000211,B9J08_000220,B9J08_000261,B9J08_000342,B9J08_000368,B9J08_000418,B9J08_000434,B9J08_000435,B9J08_000449,B9J08_000614,B9J08_000645,B9J08_000652,B9J08_000677,B9J08_000700,B9J08_000701,B9J08_000739,B9J08_000756,B9J08_000796,B9J08_000853,B9J08_000918,B9J08_000919,B9J08_000…	16	1.15	1.24	0.0164928	0.239999	1
GO:0032040	small-subunit processome	45	12	B9J08_000185,B9J08_000203,B9J08_000605,B9J08_000771,B9J08_001674,B9J08_001803,B9J08_002135,B9J08_002746,B9J08_004014,B9J08_004502,B9J08_004826,B9J08_004990,	26.7	1.91	2.27	0.0173016	0.242491	1
GO:0005971	ribonucleoside-diphosphate reductase complex	2	2	B9J08_004601,B9J08_004965,	100	7.18	inf	0.0193834	0.242491	1
GO:0009337	sulfite reductase complex (NADPH)	2	2	B9J08_001224,B9J08_003552,	100	7.18	inf	0.0193834	0.242491	1
GO:0005945	6-phosphofructokinase complex	2	2	B9J08_004309,B9J08_004928,	100	7.18	inf	0.0193834	0.242491	1
GO:0031298	replication fork protection complex	21	7	B9J08_001105,B9J08_001220,B9J08_001469,B9J08_001587,B9J08_002929,B9J08_003467,B9J08_005476,	33.3	2.39	3.11	0.0195372	0.242491	1
GO:0031428	box C/D RNP complex	5	3	B9J08_001674,B9J08_001803,B9J08_002746,	60	4.31	9.31	0.0216377	0.246786	1
GO:0042555	MCM complex	5	3	B9J08_001105,B9J08_003467,B9J08_005476,	60	4.31	9.31	0.0216377	0.246786	1
GO:0031166	integral component of vacuolar membrane	5	3	B9J08_000175,B9J08_002006,B9J08_002902,	60	4.31	9.31	0.0216377	0.246786	1
GO:0016021	integral component of membrane	1053	167	B9J08_000002,B9J08_000008,B9J08_000034,B9J08_000072,B9J08_000073,B9J08_000164,B9J08_000170,B9J08_000172,B9J08_000175,B9J08_000211,B9J08_000220,B9J08_000261,B9J08_000342,B9J08_000368,B9J08_000418,B9J08_000434,B9J08_000435,B9J08_000449,B9J08_000645,B9J08_000652,B9J08_000677,B9J08_000700,B9J08_000701,B9J08_000739,B9J08_000756,B9J08_000796,B9J08_000853,B9J08_000919,B9J08_000964,B9J08_000995,B9J08_001…	15.9	1.14	1.22	0.0236857	0.263036	1
GO:0043601	nuclear replisome	10	4	B9J08_001474,B9J08_002225,B9J08_003155,B9J08_005515,	40	2.87	4.14	0.0391573	0.423702	1
GO:0010494	cytoplasmic stress granule	80	17	B9J08_000102,B9J08_000458,B9J08_000774,B9J08_000822,B9J08_001035,B9J08_001224,B9J08_001467,B9J08_001824,B9J08_001917,B9J08_001989,B9J08_002691,B9J08_002813,B9J08_003432,B9J08_004485,B9J08_005188,B9J08_005324,B9J08_005385,	21.3	1.53	1.68	0.0461982	0.487391	1
KEGG
ID	Name	Bgd count	Result count	Result gene list	Pct of bgd	Fold enrichment	Odds ratio	P-value	Benjamini	Bonferroni
ec00361__PK__KEGG	Chlorocyclohexane and chlorobenzene degradation	34	12	B9J08_001281,B9J08_001292,B9J08_002408,B9J08_002419,B9J08_002427,B9J08_002977,B9J08_003216,B9J08_003737,B9J08_003844,B9J08_003867,B9J08_003953,B9J08_004548,	35.3	2.21	2.96	0.00434363	0.634171	0.634171
ec00920__PK__KEGG	Sulfur metabolism	38	12	B9J08_000174,B9J08_000238,B9J08_001224,B9J08_001561,B9J08_001571,B9J08_002427,B9J08_002995,B9J08_003238,B9J08_003552,B9J08_003894,B9J08_004579,B9J08_005307,	31.6	1.98	2.5	0.0117673	0.859011	1
ec00904__PK__KEGG	Diterpenoid biosynthesis	50	14	B9J08_000446,B9J08_000776,B9J08_001206,B9J08_001281,B9J08_001292,B9J08_002419,B9J08_002427,B9J08_002977,B9J08_003216,B9J08_003408,B9J08_003737,B9J08_003844,B9J08_003867,B9J08_005453,	28	1.75	2.1	0.0203925	0.992434	1
ec00260__PK__KEGG	Glycine, serine and threonine metabolism	82	20	B9J08_000144,B9J08_000174,B9J08_000445,B9J08_001036,B9J08_001171,B9J08_001447,B9J08_002519,B9J08_002774,B9J08_003046,B9J08_003105,B9J08_003217,B9J08_003371,B9J08_003819,B9J08_004331,B9J08_004375,B9J08_004525,B9J08_004774,B9J08_004941,B9J08_005061,B9J08_005453,	24.4	1.53	1.75	0.0284489	0.999989	1
ec00010__PK__KEGG	Glycolysis / Gluconeogenesis	121	27	B9J08_000274,B9J08_000808,B9J08_001171,B9J08_001860,B9J08_001875,B9J08_002053,B9J08_002231,B9J08_002445,B9J08_002477,B9J08_002512,B9J08_002566,B9J08_002669,B9J08_002977,B9J08_003306,B9J08_003371,B9J08_003632,B9J08_003819,B9J08_003836,B9J08_004309,B9J08_004331,B9J08_004375,B9J08_004525,B9J08_004928,B9J08_005003,B9J08_005177,B9J08_005226,B9J08_005239,	22.3	1.4	1.57	0.0362182	0.999989	1
ec00710__PK__KEGG	Carbon fixation in photosynthetic organisms	31	9	B9J08_000075,B9J08_000175,B9J08_000766,B9J08_001860,B9J08_001875,B9J08_002669,B9J08_003306,B9J08_005177,B9J08_005239,	29	1.82	2.19	0.0470441	0.999989	1
Species	Platform:	Type of genes	Criteria	Number of genes
C. auris	Candida Genome Database	downregulated	DEG; FC<-1.5	426
Biological process
GOID	GO_term	Cluster frequency	Background frequency	Corrected P-value	False discovery rate	Gene(s) annotated to the term	Directly Annotated GOID List
44242	cellular lipid catabolic process	11 out of 426 genes, 2.6%	30 out of 5417 background genes, 0.6%	0.00711	0	B9J08_000949:B9J08_001740:B9J08_001741:B9J08_001956:B9J08_002361:B9J08_002847:B9J08_003466:B9J08_003486:B9J08_003628:B9J08_004259:B9J08_005379	19752:6629:34727:6654:9062:90266:34496:6635:30397:6099:6631:36151:6624:425:6914:30149:6108:19433:6735:6650:46461:9395:16236:6660:30437:46513
966	RNA 5'-end processing	14 out of 426 genes, 3.3%	48 out of 5417 background genes, 0.9%	0.00921	0	B9J08_000257:B9J08_000537:B9J08_000673:B9J08_000979:B9J08_001133:B9J08_001139:B9J08_002000:B9J08_002211:B9J08_002981:B9J08_003906:B9J08_004311:B9J08_004414:B9J08_004491:B9J08_005116	42254:98507:6397:6396:1900182:6364:97745:2181:480:9452:294:34965:45944:32968:42255:7005:1682:42274:472:447:8033:43248:56:462:6370
472	endonucleolytic cleavage to generate mature 5'-end of SSU-rRNA from (SSU-rRNA, 5.8S rRNA, LSU-rRNA)	11 out of 426 genes, 2.6%	31 out of 5417 background genes, 0.6%	0.01026	0	B9J08_000257:B9J08_000537:B9J08_000673:B9J08_001133:B9J08_001139:B9J08_002000:B9J08_002211:B9J08_002981:B9J08_003906:B9J08_004311:B9J08_005116	42254:6396:6364:480:42255:42274:472:447:43248:56:462
460	maturation of 5.8S rRNA	19 out of 426 genes, 4.5%	82 out of 5417 background genes, 1.5%	0.0108	0	B9J08_000188:B9J08_000257:B9J08_000475:B9J08_000537:B9J08_000673:B9J08_001133:B9J08_001139:B9J08_001610:B9J08_002000:B9J08_002211:B9J08_002808:B9J08_002981:B9J08_003035:B9J08_003206:B9J08_003906:B9J08_004311:B9J08_004625:B9J08_005015:B9J08_005116	71035:6396:470:1902626:34475:42255:27:70507:973:466:71028:42274:34476:463:30490:71039:447:32956:462:42254:6364:480:467:71051:42256:70476:42273:390:472:56:43248:54
466	maturation of 5.8S rRNA from tricistronic rRNA transcript (SSU-rRNA, 5.8S rRNA, LSU-rRNA)	19 out of 426 genes, 4.5%	82 out of 5417 background genes, 1.5%	0.0108	0	B9J08_000188:B9J08_000257:B9J08_000475:B9J08_000537:B9J08_000673:B9J08_001133:B9J08_001139:B9J08_001610:B9J08_002000:B9J08_002211:B9J08_002808:B9J08_002981:B9J08_003035:B9J08_003206:B9J08_003906:B9J08_004311:B9J08_004625:B9J08_005015:B9J08_005116	71035:6396:470:1902626:34475:42255:27:70507:973:466:71028:42274:34476:463:30490:71039:447:32956:462:42254:6364:480:71051:467:42256:70476:42273:390:472:43248:56:54
9062	fatty acid catabolic process	7 out of 426 genes, 1.6%	13 out of 5417 background genes, 0.2%	0.01647	0	B9J08_000949:B9J08_001740:B9J08_001741:B9J08_001956:B9J08_002847:B9J08_003466:B9J08_003628	19752:6635:6099:6631:6735:9062:6108:30437
16042	lipid catabolic process	12 out of 426 genes, 2.8%	39 out of 5417 background genes, 0.7%	0.02168	0	B9J08_000949:B9J08_001740:B9J08_001741:B9J08_001956:B9J08_002361:B9J08_002847:B9J08_003466:B9J08_003486:B9J08_003628:B9J08_004111:B9J08_004259:B9J08_005379	19752:34727:90266:6635:30397:6099:6631:36151:6914:6650:6735:46461:9395:16042:6629:6654:9062:34496:6624:425:30149:6108:19433:16236:6660:46513:30437
967	rRNA 5'-end processing	11 out of 426 genes, 2.6%	34 out of 5417 background genes, 0.6%	0.02791	0	B9J08_000257:B9J08_000537:B9J08_000673:B9J08_001133:B9J08_001139:B9J08_002000:B9J08_002211:B9J08_002981:B9J08_003906:B9J08_004311:B9J08_005116	6396:42255:42274:447:462:42254:6364:480:472:43248:56
72329	monocarboxylic acid catabolic process	8 out of 426 genes, 1.9%	19 out of 5417 background genes, 0.4%	0.03921	0.006	B9J08_000949:B9J08_001740:B9J08_001741:B9J08_001956:B9J08_002350:B9J08_002847:B9J08_003466:B9J08_003628	19752:6635:6099:6631:6735:34599:46177:9062:61688:6098:6108:9051:30437
16054	organic acid catabolic process	13 out of 426 genes, 3.1%	48 out of 5417 background genes, 0.9%	0.04529	0.0073	B9J08_000484:B9J08_000863:B9J08_000949:B9J08_001740:B9J08_001741:B9J08_001956:B9J08_002350:B9J08_002737:B9J08_002847:B9J08_003452:B9J08_003466:B9J08_003628:B9J08_004292	19752:6536:90368:6635:10121:9249:6099:6631:9450:6525:6735:34599:46177:9062:9448:61688:6540:6098:19547:6546:19464:6730:6108:9051:30437
46395	carboxylic acid catabolic process	13 out of 426 genes, 3.1%	48 out of 5417 background genes, 0.9%	0.04529	0.0067	B9J08_000484:B9J08_000863:B9J08_000949:B9J08_001740:B9J08_001741:B9J08_001956:B9J08_002350:B9J08_002737:B9J08_002847:B9J08_003452:B9J08_003466:B9J08_003628:B9J08_004292	19752:6536:90368:6635:10121:9249:6099:6631:9450:6525:6735:34599:46177:9062:9448:61688:6540:6098:19547:6546:19464:6730:6108:9051:30437
480	endonucleolytic cleavage in 5'-ETS of tricistronic rRNA transcript (SSU-rRNA, 5.8S rRNA, LSU-rRNA)	10 out of 426 genes, 2.3%	30 out of 5417 background genes, 0.6%	0.04784	0.0062	B9J08_000257:B9J08_000673:B9J08_001133:B9J08_001139:B9J08_002000:B9J08_002211:B9J08_002981:B9J08_003906:B9J08_004311:B9J08_005116	6396:42274:447:462:42254:6364:480:472:56
Molecular function
GOID	GO_term	Cluster frequency	Background frequency	Corrected P-value	False discovery rate	Gene(s) annotated to the term	Directly Annotated GOID List
30527	structural constituent of chromatin	7 out of 426 genes, 1.6%	10 out of 5417 background genes, 0.2%	0.00044	0	B9J08_000855:B9J08_002072:B9J08_002073:B9J08_003368:B9J08_003369:B9J08_005144:B9J08_005145	46982:3677:140463:8823:30527
4553	hydrolase activity, hydrolyzing O-glycosyl compounds	11 out of 426 genes, 2.6%	39 out of 5417 background genes, 0.7%	0.03565	0.07	B9J08_001324:B9J08_001383:B9J08_001529:B9J08_001985:B9J08_002109:B9J08_002188:B9J08_002596:B9J08_002761:B9J08_004410:B9J08_004477:B9J08_004534	3824:52861:16798:8496:42973:30247:4571:8843:4575:30246:4553:4559:4573:4564:16757
Cellular component
GOID	GO_term	Cluster frequency	Background frequency	Corrected P-value	False discovery rate	Gene(s) annotated to the term	Directly Annotated GOID List
786	nucleosome	7 out of 426 genes, 1.6%	9 out of 5417 background genes, 0.2%	0.0001	0	B9J08_000855:B9J08_002072:B9J08_002073:B9J08_003368:B9J08_003369:B9J08_005144:B9J08_005145	31298:786:33553:43505:5721:31934:99115:5634:140602:35861:785:792
5686	U2 snRNP	7 out of 426 genes, 1.6%	15 out of 5417 background genes, 0.3%	0.01274	0.02	B9J08_000770:B9J08_000968:B9J08_002222:B9J08_002800:B9J08_003547:B9J08_005142:B9J08_005327	5684:71014:5681:70274:5634:974:46540:5682:71004:5685:5686
Species	Platform:	Type of genes	Criteria	Number of genes
C. auris	FungiDB	downregulated	DEG; FC<-1.5	426
Biological process
ID	Name	Bgd count	Result count	Result gene list	Pct of bgd	Fold enrichment	Odds ratio	P-value	Benjamini	Bonferroni
GO:0034471	ncRNA 5'-end processing	35	12	B9J08_000257,B9J08_000537,B9J08_000673,B9J08_001133,B9J08_001139,B9J08_002000,B9J08_002211,B9J08_002981,B9J08_003906,B9J08_004311,B9J08_004491,B9J08_005116,	34.3	4.73	6.89	3.13011e-06	0.0021684	0.00607868
GO:0000966	RNA 5'-end processing	36	12	B9J08_000257,B9J08_000537,B9J08_000673,B9J08_001133,B9J08_001139,B9J08_002000,B9J08_002211,B9J08_002981,B9J08_003906,B9J08_004311,B9J08_004491,B9J08_005116,	33.3	4.6	6.6	4.39338e-06	0.0021684	0.00853194
GO:0000472	endonucleolytic cleavage to generate mature 5'-end of SSU-rRNA from (SSU-rRNA, 5.8S rRNA, LSU-rRNA)	31	11	B9J08_000257,B9J08_000537,B9J08_000673,B9J08_001133,B9J08_001139,B9J08_002000,B9J08_002211,B9J08_002981,B9J08_003906,B9J08_004311,B9J08_005116,	35.5	4.9	7.25	5.55606e-06	0.0021684	0.0107899
GO:0000460	maturation of 5.8S rRNA	84	19	B9J08_000188,B9J08_000257,B9J08_000475,B9J08_000537,B9J08_000673,B9J08_001133,B9J08_001139,B9J08_001610,B9J08_002000,B9J08_002211,B9J08_002808,B9J08_002981,B9J08_003035,B9J08_003206,B9J08_003906,B9J08_004311,B9J08_004625,B9J08_005015,B9J08_005116,	22.6	3.12	3.91	5.5829e-06	0.0021684	0.010842
GO:0000466	maturation of 5.8S rRNA from tricistronic rRNA transcript (SSU-rRNA, 5.8S rRNA, LSU-rRNA)	84	19	B9J08_000188,B9J08_000257,B9J08_000475,B9J08_000537,B9J08_000673,B9J08_001133,B9J08_001139,B9J08_001610,B9J08_002000,B9J08_002211,B9J08_002808,B9J08_002981,B9J08_003035,B9J08_003206,B9J08_003906,B9J08_004311,B9J08_004625,B9J08_005015,B9J08_005116,	22.6	3.12	3.91	5.5829e-06	0.0021684	0.010842
GO:0006364	rRNA processing	208	33	B9J08_000061,B9J08_000188,B9J08_000214,B9J08_000257,B9J08_000475,B9J08_000537,B9J08_000673,B9J08_000754,B9J08_000883,B9J08_001133,B9J08_001139,B9J08_001560,B9J08_001610,B9J08_002000,B9J08_002081,B9J08_002211,B9J08_002808,B9J08_002981,B9J08_003035,B9J08_003206,B9J08_003602,B9J08_003821,B9J08_003906,B9J08_004119,B9J08_004153,B9J08_004311,B9J08_004414,B9J08_004625,B9J08_005015,B9J08_005069,B9J08_005…	15.9	2.19	2.57	1.10104e-05	0.00308698	0.0213822
GO:0000967	rRNA 5'-end processing	33	11	B9J08_000257,B9J08_000537,B9J08_000673,B9J08_001133,B9J08_001139,B9J08_002000,B9J08_002211,B9J08_002981,B9J08_003906,B9J08_004311,B9J08_005116,	33.3	4.6	6.58	1.11271e-05	0.00308698	0.0216089
GO:0000480	endonucleolytic cleavage in 5'-ETS of tricistronic rRNA transcript (SSU-rRNA, 5.8S rRNA, LSU-rRNA)	30	10	B9J08_000257,B9J08_000673,B9J08_001133,B9J08_001139,B9J08_002000,B9J08_002211,B9J08_002981,B9J08_003906,B9J08_004311,B9J08_005116,	33.3	4.6	6.57	2.82307e-05	0.006853	0.054824
GO:0016072	rRNA metabolic process	221	33	B9J08_000061,B9J08_000188,B9J08_000214,B9J08_000257,B9J08_000475,B9J08_000537,B9J08_000673,B9J08_000754,B9J08_000883,B9J08_001133,B9J08_001139,B9J08_001560,B9J08_001610,B9J08_002000,B9J08_002081,B9J08_002211,B9J08_002808,B9J08_002981,B9J08_003035,B9J08_003206,B9J08_003602,B9J08_003821,B9J08_003906,B9J08_004119,B9J08_004153,B9J08_004311,B9J08_004414,B9J08_004625,B9J08_005015,B9J08_005069,B9J08_005…	14.9	2.06	2.38	3.99782e-05	0.00845626	0.0776377
GO:0000447	endonucleolytic cleavage in ITS1 to separate SSU-rRNA from 5.8S rRNA and LSU-rRNA from tricistronic rRNA transcript (SSU-rRNA, 5.8S rRNA, LSU-rRNA)	44	12	B9J08_000257,B9J08_000537,B9J08_000673,B9J08_001133,B9J08_001139,B9J08_002000,B9J08_002211,B9J08_002808,B9J08_002981,B9J08_003906,B9J08_004311,B9J08_005116,	27.3	3.77	4.94	4.35441e-05	0.00845626	0.0845626
GO:0000462	maturation of SSU-rRNA from tricistronic rRNA transcript (SSU-rRNA, 5.8S rRNA, LSU-rRNA)	91	18	B9J08_000061,B9J08_000188,B9J08_000214,B9J08_000257,B9J08_000537,B9J08_000673,B9J08_001133,B9J08_001139,B9J08_002000,B9J08_002211,B9J08_002808,B9J08_002981,B9J08_003821,B9J08_003906,B9J08_004153,B9J08_004311,B9J08_005116,B9J08_005126,	19.8	2.73	3.28	6.79208e-05	0.0113793	0.131902
GO:0006396	RNA processing	436	53	B9J08_000061,B9J08_000083,B9J08_000188,B9J08_000214,B9J08_000257,B9J08_000475,B9J08_000537,B9J08_000673,B9J08_000754,B9J08_000770,B9J08_000883,B9J08_000968,B9J08_000979,B9J08_001026,B9J08_001133,B9J08_001139,B9J08_001560,B9J08_001598,B9J08_001610,B9J08_001912,B9J08_002000,B9J08_002081,B9J08_002211,B9J08_002310,B9J08_002800,B9J08_002808,B9J08_002883,B9J08_002981,B9J08_003035,B9J08_003196,B9J08_003…	12.2	1.68	1.92	7.60583e-05	0.0113793	0.147705
GO:0030490	maturation of SSU-rRNA	100	19	B9J08_000061,B9J08_000188,B9J08_000214,B9J08_000257,B9J08_000537,B9J08_000673,B9J08_001133,B9J08_001139,B9J08_001560,B9J08_002000,B9J08_002211,B9J08_002808,B9J08_002981,B9J08_003821,B9J08_003906,B9J08_004153,B9J08_004311,B9J08_005116,B9J08_005126,	19	2.62	3.12	7.61743e-05	0.0113793	0.147931
GO:0034470	ncRNA processing	311	41	B9J08_000061,B9J08_000188,B9J08_000214,B9J08_000257,B9J08_000475,B9J08_000537,B9J08_000673,B9J08_000754,B9J08_000883,B9J08_001133,B9J08_001139,B9J08_001560,B9J08_001598,B9J08_001610,B9J08_001912,B9J08_002000,B9J08_002081,B9J08_002211,B9J08_002310,B9J08_002808,B9J08_002981,B9J08_003035,B9J08_003196,B9J08_003206,B9J08_003293,B9J08_003327,B9J08_003602,B9J08_003821,B9J08_003906,B9J08_004119,B9J08_004…	13.2	1.82	2.07	9.08402e-05	0.012273	0.176412
GO:0044242	cellular lipid catabolic process	34	10	B9J08_001740,B9J08_001741,B9J08_001956,B9J08_002361,B9J08_002847,B9J08_003466,B9J08_003486,B9J08_003628,B9J08_004259,B9J08_005379,	29.4	4.06	5.47	9.47964e-05	0.012273	0.184095
GO:0006334	nucleosome assembly	17	7	B9J08_000855,B9J08_002072,B9J08_002073,B9J08_003368,B9J08_003369,B9J08_005144,B9J08_005145,	41.2	5.68	9.13	0.000101356	0.0123021	0.196834
GO:0042274	ribosomal small subunit biogenesis	115	20	B9J08_000061,B9J08_000188,B9J08_000214,B9J08_000257,B9J08_000537,B9J08_000673,B9J08_001133,B9J08_001139,B9J08_001560,B9J08_002000,B9J08_002081,B9J08_002211,B9J08_002808,B9J08_002981,B9J08_003821,B9J08_003906,B9J08_004153,B9J08_004311,B9J08_005116,B9J08_005126,	17.4	2.4	2.8	0.000178702	0.020414	0.347039
GO:0006635	fatty acid beta-oxidation	9	5	B9J08_001740,B9J08_001741,B9J08_002847,B9J08_003466,B9J08_003628,	55.6	7.67	16.23	0.000191355	0.020645	0.371611
GO:0016042	lipid catabolic process	44	11	B9J08_001740,B9J08_001741,B9J08_001956,B9J08_002361,B9J08_002847,B9J08_003466,B9J08_003486,B9J08_003628,B9J08_004111,B9J08_004259,B9J08_005379,	25	3.45	4.38	0.000213566	0.0218287	0.414745
GO:0000478	endonucleolytic cleavage involved in rRNA processing	54	12	B9J08_000257,B9J08_000537,B9J08_000673,B9J08_001133,B9J08_001139,B9J08_002000,B9J08_002211,B9J08_002808,B9J08_002981,B9J08_003906,B9J08_004311,B9J08_005116,	22.2	3.07	3.76	0.000365619	0.0332747	0.710033
GO:0000479	endonucleolytic cleavage of tricistronic rRNA transcript (SSU-rRNA, 5.8S rRNA, LSU-rRNA)	54	12	B9J08_000257,B9J08_000537,B9J08_000673,B9J08_001133,B9J08_001139,B9J08_002000,B9J08_002211,B9J08_002808,B9J08_002981,B9J08_003906,B9J08_004311,B9J08_005116,	22.2	3.07	3.76	0.000365619	0.0332747	0.710033
GO:0033540	fatty acid beta-oxidation using acyl-CoA oxidase	3	3	B9J08_001740,B9J08_001741,B9J08_003628,	100	13.81	inf	0.000376953	0.0332747	0.732043
GO:0042254	ribosome biogenesis	292	37	B9J08_000061,B9J08_000111,B9J08_000118,B9J08_000188,B9J08_000214,B9J08_000257,B9J08_000475,B9J08_000537,B9J08_000673,B9J08_000754,B9J08_000883,B9J08_001133,B9J08_001139,B9J08_001560,B9J08_001610,B9J08_002000,B9J08_002081,B9J08_002211,B9J08_002602,B9J08_002808,B9J08_002981,B9J08_003035,B9J08_003206,B9J08_003602,B9J08_003821,B9J08_003906,B9J08_004119,B9J08_004153,B9J08_004311,B9J08_004414,B9J08_004…	12.7	1.75	1.96	0.000455808	0.038486	0.885179
GO:0090502	RNA phosphodiester bond hydrolysis, endonucleolytic	56	12	B9J08_000257,B9J08_000537,B9J08_000673,B9J08_001133,B9J08_001139,B9J08_002000,B9J08_002211,B9J08_002808,B9J08_002981,B9J08_003906,B9J08_004311,B9J08_005116,	21.4	2.96	3.58	0.000521651	0.0422102	1
GO:0019395	fatty acid oxidation	11	5	B9J08_001740,B9J08_001741,B9J08_002847,B9J08_003466,B9J08_003628,	45.5	6.28	10.82	0.000621166	0.0463963	1
GO:0034440	lipid oxidation	11	5	B9J08_001740,B9J08_001741,B9J08_002847,B9J08_003466,B9J08_003628,	45.5	6.28	10.82	0.000621166	0.0463963	1
GO:0000469	cleavage involved in rRNA processing	75	14	B9J08_000257,B9J08_000537,B9J08_000673,B9J08_001133,B9J08_001139,B9J08_001610,B9J08_002000,B9J08_002211,B9J08_002808,B9J08_002981,B9J08_003906,B9J08_004311,B9J08_005116,B9J08_005126,	18.7	2.58	3.02	0.000807349	0.0576906	1
GO:0034660	ncRNA metabolic process	367	43	B9J08_000061,B9J08_000188,B9J08_000214,B9J08_000257,B9J08_000475,B9J08_000537,B9J08_000673,B9J08_000754,B9J08_000862,B9J08_000883,B9J08_001122,B9J08_001133,B9J08_001139,B9J08_001560,B9J08_001598,B9J08_001610,B9J08_001912,B9J08_002000,B9J08_002081,B9J08_002211,B9J08_002310,B9J08_002808,B9J08_002981,B9J08_003035,B9J08_003196,B9J08_003206,B9J08_003293,B9J08_003327,B9J08_003602,B9J08_003821,B9J08_003…	11.7	1.62	1.8	0.00085638	0.0576906	1
GO:0009062	fatty acid catabolic process	17	6	B9J08_001740,B9J08_001741,B9J08_001956,B9J08_002847,B9J08_003466,B9J08_003628,	35.3	4.87	7.09	0.000861496	0.0576906	1
GO:0034293	sexual sporulation	77	14	B9J08_000928,B9J08_001956,B9J08_002073,B9J08_002142,B9J08_002635,B9J08_002876,B9J08_003060,B9J08_003368,B9J08_003732,B9J08_003824,B9J08_004240,B9J08_004841,B9J08_005344,B9J08_005380,	18.2	2.51	2.93	0.00105932	0.0663615	1
GO:0043935	sexual sporulation resulting in formation of a cellular spore	77	14	B9J08_000928,B9J08_001956,B9J08_002073,B9J08_002142,B9J08_002635,B9J08_002876,B9J08_003060,B9J08_003368,B9J08_003732,B9J08_003824,B9J08_004240,B9J08_004841,B9J08_005344,B9J08_005380,	18.2	2.51	2.93	0.00105932	0.0663615	1
GO:0046395	carboxylic acid catabolic process	71	13	B9J08_000484,B9J08_000863,B9J08_001740,B9J08_001741,B9J08_001956,B9J08_002350,B9J08_002737,B9J08_002847,B9J08_003452,B9J08_003466,B9J08_003628,B9J08_004264,B9J08_004292,	18.3	2.53	2.94	0.00148493	0.0901167	1
GO:0030435	sporulation resulting in formation of a cellular spore	89	15	B9J08_000928,B9J08_001956,B9J08_002073,B9J08_002142,B9J08_002635,B9J08_002876,B9J08_003060,B9J08_003368,B9J08_003732,B9J08_003824,B9J08_003879,B9J08_004240,B9J08_004841,B9J08_005344,B9J08_005380,	16.9	2.33	2.67	0.00159073	0.0936119	1
GO:0022613	ribonucleoprotein complex biogenesis	357	41	B9J08_000061,B9J08_000083,B9J08_000111,B9J08_000118,B9J08_000188,B9J08_000214,B9J08_000257,B9J08_000475,B9J08_000537,B9J08_000673,B9J08_000754,B9J08_000883,B9J08_000968,B9J08_001133,B9J08_001139,B9J08_001560,B9J08_001610,B9J08_002000,B9J08_002081,B9J08_002211,B9J08_002602,B9J08_002808,B9J08_002981,B9J08_003035,B9J08_003206,B9J08_003602,B9J08_003821,B9J08_003906,B9J08_004119,B9J08_004153,B9J08_004…	11.5	1.59	1.75	0.00168278	0.0941267	1
GO:0016054	organic acid catabolic process	72	13	B9J08_000484,B9J08_000863,B9J08_001740,B9J08_001741,B9J08_001956,B9J08_002350,B9J08_002737,B9J08_002847,B9J08_003452,B9J08_003466,B9J08_003628,B9J08_004264,B9J08_004292,	18.1	2.49	2.89	0.00169641	0.0941267	1
GO:0048646	anatomical structure formation involved in morphogenesis	90	15	B9J08_000928,B9J08_001956,B9J08_002073,B9J08_002142,B9J08_002635,B9J08_002876,B9J08_003060,B9J08_003368,B9J08_003732,B9J08_003824,B9J08_003879,B9J08_004240,B9J08_004841,B9J08_005344,B9J08_005380,	16.7	2.3	2.63	0.00178622	0.0963564	1
GO:0072329	monocarboxylic acid catabolic process	33	8	B9J08_001740,B9J08_001741,B9J08_001956,B9J08_002350,B9J08_002847,B9J08_003466,B9J08_003628,B9J08_004264,	24.2	3.35	4.17	0.00194431	0.10205	1
GO:0009448	gamma-aminobutyric acid metabolic process	5	3	B9J08_000863,B9J08_002737,B9J08_003452,	60	8.28	19.37	0.00337496	0.156052	1
GO:0009450	gamma-aminobutyric acid catabolic process	5	3	B9J08_000863,B9J08_002737,B9J08_003452,	60	8.28	19.37	0.00337496	0.156052	1
GO:0031936	obsolete negative regulation of chromatin silencing	5	3	B9J08_000855,B9J08_000862,B9J08_003798,	60	8.28	19.37	0.00337496	0.156052	1
GO:0036278	positive regulation of transcription from RNA polymerase II promoter in response to nitrogen starvation	5	3	B9J08_002524,B9J08_002840,B9J08_004355,	60	8.28	19.37	0.00337496	0.156052	1
GO:0051409	response to nitrosative stress	5	3	B9J08_001182,B9J08_002657,B9J08_002840,	60	8.28	19.37	0.00337496	0.156052	1
GO:0044282	small molecule catabolic process	98	15	B9J08_000484,B9J08_000863,B9J08_001383,B9J08_001740,B9J08_001741,B9J08_001956,B9J08_002350,B9J08_002737,B9J08_002847,B9J08_003452,B9J08_003466,B9J08_003568,B9J08_003628,B9J08_004264,B9J08_004292,	15.3	2.11	2.38	0.00419265	0.189352	1
GO:0051354	negative regulation of oxidoreductase activity	2	2	B9J08_003611,B9J08_004644,	100	13.81	inf	0.0052326	0.211702	1
GO:0034090	maintenance of meiotic sister chromatid cohesion	2	2	B9J08_003381,B9J08_003424,	100	13.81	inf	0.0052326	0.211702	1
GO:0061394	regulation of transcription from RNA polymerase II promoter in response to arsenic-containing substance	2	2	B9J08_002840,B9J08_003372,	100	13.81	inf	0.0052326	0.211702	1
GO:0000316	sulfite transport	2	2	B9J08_003703,B9J08_004533,	100	13.81	inf	0.0052326	0.211702	1
GO:0061395	positive regulation of transcription from RNA polymerase II promoter in response to arsenic-containing substance	2	2	B9J08_002840,B9J08_003372,	100	13.81	inf	0.0052326	0.211702	1
GO:0043934	sporulation	104	15	B9J08_000928,B9J08_001956,B9J08_002073,B9J08_002142,B9J08_002635,B9J08_002876,B9J08_003060,B9J08_003368,B9J08_003732,B9J08_003824,B9J08_003879,B9J08_004240,B9J08_004841,B9J08_005344,B9J08_005380,	14.4	1.99	2.21	0.00736187	0.29177	1
GO:0000463	maturation of LSU-rRNA from tricistronic rRNA transcript (SSU-rRNA, 5.8S rRNA, LSU-rRNA)	41	8	B9J08_000188,B9J08_000475,B9J08_000883,B9J08_003035,B9J08_003206,B9J08_004625,B9J08_005015,B9J08_005373,	19.5	2.69	3.16	0.00804995	0.31266	1
GO:0009653	anatomical structure morphogenesis	106	15	B9J08_000928,B9J08_001956,B9J08_002073,B9J08_002142,B9J08_002635,B9J08_002876,B9J08_003060,B9J08_003368,B9J08_003732,B9J08_003824,B9J08_003879,B9J08_004240,B9J08_004841,B9J08_005344,B9J08_005380,	14.2	1.95	2.16	0.00876689	0.33383	1
GO:0090646	mitochondrial tRNA processing	7	3	B9J08_001598,B9J08_003327,B9J08_004491,	42.9	5.92	9.68	0.0105848	0.394512	1
GO:0000470	maturation of LSU-rRNA	43	8	B9J08_000188,B9J08_000475,B9J08_000883,B9J08_003035,B9J08_003206,B9J08_004625,B9J08_005015,B9J08_005373,	18.6	2.57	2.97	0.0107668	0.394512	1
GO:0030258	lipid modification	20	5	B9J08_001740,B9J08_001741,B9J08_002847,B9J08_003466,B9J08_003628,	25	3.45	4.32	0.0121174	0.422259	1
GO:0090501	RNA phosphodiester bond hydrolysis	100	14	B9J08_000257,B9J08_000537,B9J08_000673,B9J08_001133,B9J08_001139,B9J08_001610,B9J08_002000,B9J08_002211,B9J08_002808,B9J08_002981,B9J08_003906,B9J08_004311,B9J08_005116,B9J08_005126,	14	1.93	2.13	0.0122148	0.422259	1
GO:0042273	ribosomal large subunit biogenesis	91	13	B9J08_000111,B9J08_000118,B9J08_000188,B9J08_000475,B9J08_000883,B9J08_003035,B9J08_003206,B9J08_003602,B9J08_004625,B9J08_005015,B9J08_005069,B9J08_005120,B9J08_005373,	14.3	1.97	2.18	0.0131722	0.422259	1
GO:0031454	regulation of extent of heterochromatin assembly	3	2	B9J08_002072,B9J08_003368,	66.7	9.2	25.76	0.0149439	0.422259	1
GO:0061402	positive regulation of transcription from RNA polymerase II promoter in response to acidic pH	3	2	B9J08_002840,B9J08_003227,	66.7	9.2	25.76	0.0149439	0.422259	1
GO:0070899	mitochondrial tRNA wobble uridine modification	3	2	B9J08_001598,B9J08_003327,	66.7	9.2	25.76	0.0149439	0.422259	1
GO:0051220	cytoplasmic sequestering of protein	3	2	B9J08_000542,B9J08_004676,	66.7	9.2	25.76	0.0149439	0.422259	1
GO:0070458	cellular detoxification of nitrogen compound	3	2	B9J08_002171,B9J08_002657,	66.7	9.2	25.76	0.0149439	0.422259	1
GO:0071468	cellular response to acidic pH	3	2	B9J08_002840,B9J08_003227,	66.7	9.2	25.76	0.0149439	0.422259	1
GO:0051410	detoxification of nitrogen compound	3	2	B9J08_002171,B9J08_002657,	66.7	9.2	25.76	0.0149439	0.422259	1
GO:0071500	cellular response to nitrosative stress	3	2	B9J08_002657,B9J08_002840,	66.7	9.2	25.76	0.0149439	0.422259	1
GO:1902575	protein localization to cell division site involved in cytokinesis, actomyosin contractile ring assembly	3	2	B9J08_002838,B9J08_004935,	66.7	9.2	25.76	0.0149439	0.422259	1
GO:1903476	protein localization to cell division site involved in mitotic actomyosin contractile ring assembly	3	2	B9J08_002838,B9J08_004935,	66.7	9.2	25.76	0.0149439	0.422259	1
GO:0010923	negative regulation of phosphatase activity	3	2	B9J08_001921,B9J08_003066,	66.7	9.2	25.76	0.0149439	0.422259	1
GO:0032515	negative regulation of phosphoprotein phosphatase activity	3	2	B9J08_001921,B9J08_003066,	66.7	9.2	25.76	0.0149439	0.422259	1
GO:0000920	septum digestion after cytokinesis	14	4	B9J08_002008,B9J08_002109,B9J08_002761,B9J08_003611,	28.6	3.94	5.17	0.0151243	0.422259	1
GO:0055085	transmembrane transport	381	39	B9J08_000032,B9J08_000928,B9J08_000938,B9J08_000972,B9J08_000982,B9J08_001015,B9J08_001183,B9J08_001362,B9J08_001487,B9J08_001526,B9J08_001527,B9J08_001528,B9J08_001737,B9J08_001899,B9J08_002168,B9J08_002237,B9J08_002480,B9J08_002646,B9J08_002659,B9J08_002660,B9J08_002666,B9J08_002965,B9J08_003703,B9J08_004040,B9J08_004099,B9J08_004113,B9J08_004160,B9J08_004204,B9J08_004243,B9J08_004264,B9J08_004…	10.2	1.41	1.52	0.0152205	0.422259	1
GO:0048468	cell development	86	12	B9J08_000928,B9J08_001956,B9J08_002142,B9J08_002635,B9J08_002876,B9J08_003060,B9J08_003732,B9J08_003824,B9J08_003879,B9J08_004240,B9J08_004841,B9J08_005380,	14	1.93	2.12	0.0200778	0.513396	1
GO:0000398	mRNA splicing, via spliceosome	86	12	B9J08_000083,B9J08_000188,B9J08_000770,B9J08_000968,B9J08_001026,B9J08_002800,B9J08_002883,B9J08_003547,B9J08_003803,B9J08_004631,B9J08_004813,B9J08_005142,	14	1.93	2.12	0.0200778	0.513396	1
GO:0000377	RNA splicing, via transesterification reactions with bulged adenosine as nucleophile	87	12	B9J08_000083,B9J08_000188,B9J08_000770,B9J08_000968,B9J08_001026,B9J08_002800,B9J08_002883,B9J08_003547,B9J08_003803,B9J08_004631,B9J08_004813,B9J08_005142,	13.8	1.9	2.09	0.021829	0.513396	1
GO:0071322	cellular response to carbohydrate stimulus	9	3	B9J08_001391,B9J08_002635,B9J08_004167,	33.3	4.6	6.45	0.0227831	0.513396	1
GO:0030437	ascospore formation	68	10	B9J08_000928,B9J08_001956,B9J08_002142,B9J08_002635,B9J08_002876,B9J08_003060,B9J08_003732,B9J08_004240,B9J08_004841,B9J08_005380,	14.7	2.03	2.24	0.0232647	0.513396	1
GO:0072697	protein localization to cell cortex	16	4	B9J08_002838,B9J08_003828,B9J08_004935,B9J08_005380,	25	3.45	4.31	0.0245158	0.513396	1
GO:0044703	multi-organism reproductive process	131	16	B9J08_000228,B9J08_000928,B9J08_001956,B9J08_002073,B9J08_002109,B9J08_002142,B9J08_002635,B9J08_002876,B9J08_003060,B9J08_003368,B9J08_003732,B9J08_003824,B9J08_004240,B9J08_004841,B9J08_005344,B9J08_005380,	12.2	1.69	1.82	0.0260814	0.513396	1
GO:0019953	sexual reproduction	131	16	B9J08_000228,B9J08_000928,B9J08_001956,B9J08_002073,B9J08_002109,B9J08_002142,B9J08_002635,B9J08_002876,B9J08_003060,B9J08_003368,B9J08_003732,B9J08_003824,B9J08_004240,B9J08_004841,B9J08_005344,B9J08_005380,	12.2	1.69	1.82	0.0260814	0.513396	1
GO:0051341	regulation of oxidoreductase activity	4	2	B9J08_003611,B9J08_004644,	50	6.9	12.88	0.0284612	0.513396	1
GO:0071469	cellular response to alkaline pH	4	2	B9J08_002840,B9J08_003060,	50	6.9	12.88	0.0284612	0.513396	1
GO:0018216	peptidyl-arginine methylation	4	2	B9J08_001451,B9J08_002973,	50	6.9	12.88	0.0284612	0.513396	1
GO:0035305	negative regulation of dephosphorylation	4	2	B9J08_001921,B9J08_003066,	50	6.9	12.88	0.0284612	0.513396	1
GO:0018195	peptidyl-arginine modification	4	2	B9J08_001451,B9J08_002973,	50	6.9	12.88	0.0284612	0.513396	1
GO:0035308	negative regulation of protein dephosphorylation	4	2	B9J08_001921,B9J08_003066,	50	6.9	12.88	0.0284612	0.513396	1
GO:0036212	contractile ring maintenance	4	2	B9J08_002838,B9J08_003879,	50	6.9	12.88	0.0284612	0.513396	1
GO:0031566	actomyosin contractile ring maintenance	4	2	B9J08_002838,B9J08_003879,	50	6.9	12.88	0.0284612	0.513396	1
GO:0071243	cellular response to arsenic-containing substance	4	2	B9J08_002840,B9J08_003372,	50	6.9	12.88	0.0284612	0.513396	1
GO:0010446	response to alkaline pH	4	2	B9J08_002840,B9J08_003060,	50	6.9	12.88	0.0284612	0.513396	1
GO:0046513	ceramide biosynthetic process	4	2	B9J08_004239,B9J08_004259,	50	6.9	12.88	0.0284612	0.513396	1
GO:0034086	maintenance of sister chromatid cohesion	4	2	B9J08_003381,B9J08_003424,	50	6.9	12.88	0.0284612	0.513396	1
GO:1902406	mitotic actomyosin contractile ring maintenance	4	2	B9J08_002838,B9J08_003879,	50	6.9	12.88	0.0284612	0.513396	1
GO:0031505	fungal-type cell wall organization	81	11	B9J08_000398,B9J08_001298,B9J08_001734,B9J08_002109,B9J08_002149,B9J08_002560,B9J08_003575,B9J08_003879,B9J08_004410,B9J08_004786,B9J08_004841,	13.6	1.87	2.05	0.0304488	0.513396	1
GO:0009743	response to carbohydrate	10	3	B9J08_001391,B9J08_002635,B9J08_004167,	30	4.14	5.53	0.0308331	0.513396	1
GO:0071467	cellular response to pH	10	3	B9J08_002840,B9J08_003060,B9J08_003227,	30	4.14	5.53	0.0308331	0.513396	1
GO:0031167	rRNA methylation	10	3	B9J08_000754,B9J08_002808,B9J08_005069,	30	4.14	5.53	0.0308331	0.513396	1
GO:0009313	oligosaccharide catabolic process	10	3	B9J08_001383,B9J08_002635,B9J08_004534,	30	4.14	5.53	0.0308331	0.513396	1
GO:0008643	carbohydrate transport	10	3	B9J08_000938,B9J08_000972,B9J08_004797,	30	4.14	5.53	0.0308331	0.513396	1
GO:0010563	negative regulation of phosphorus metabolic process	25	5	B9J08_001391,B9J08_001921,B9J08_002261,B9J08_003066,B9J08_005272,	20	2.76	3.23	0.0308529	0.513396	1
GO:0045936	negative regulation of phosphate metabolic process	25	5	B9J08_001391,B9J08_001921,B9J08_002261,B9J08_003066,B9J08_005272,	20	2.76	3.23	0.0308529	0.513396	1
GO:0000375	RNA splicing, via transesterification reactions	92	12	B9J08_000083,B9J08_000188,B9J08_000770,B9J08_000968,B9J08_001026,B9J08_002800,B9J08_002883,B9J08_003547,B9J08_003803,B9J08_004631,B9J08_004813,B9J08_005142,	13	1.8	1.95	0.0323193	0.513396	1
GO:0016070	RNA metabolic process	739	66	B9J08_000061,B9J08_000083,B9J08_000188,B9J08_000214,B9J08_000257,B9J08_000475,B9J08_000537,B9J08_000673,B9J08_000721,B9J08_000754,B9J08_000770,B9J08_000862,B9J08_000883,B9J08_000902,B9J08_000968,B9J08_000979,B9J08_001026,B9J08_001122,B9J08_001133,B9J08_001139,B9J08_001560,B9J08_001598,B9J08_001610,B9J08_001912,B9J08_002000,B9J08_002073,B9J08_002081,B9J08_002169,B9J08_002211,B9J08_002230,B9J08_002…	8.9	1.23	1.32	0.034495	0.513396	1
GO:0030154	cell differentiation	125	15	B9J08_000928,B9J08_001956,B9J08_002073,B9J08_002142,B9J08_002635,B9J08_002876,B9J08_003060,B9J08_003368,B9J08_003732,B9J08_003824,B9J08_003879,B9J08_004240,B9J08_004841,B9J08_005344,B9J08_005380,	12	1.66	1.78	0.0351682	0.513396	1
GO:0045229	external encapsulating structure organization	83	11	B9J08_000398,B9J08_001298,B9J08_001734,B9J08_002109,B9J08_002149,B9J08_002560,B9J08_003575,B9J08_003879,B9J08_004410,B9J08_004786,B9J08_004841,	13.3	1.83	1.99	0.0356594	0.513396	1
GO:0071555	cell wall organization	83	11	B9J08_000398,B9J08_001298,B9J08_001734,B9J08_002109,B9J08_002149,B9J08_002560,B9J08_003575,B9J08_003879,B9J08_004410,B9J08_004786,B9J08_004841,	13.3	1.83	1.99	0.0356594	0.513396	1
GO:0043414	macromolecule methylation	73	10	B9J08_000193,B9J08_000393,B9J08_000754,B9J08_001451,B9J08_002073,B9J08_002808,B9J08_002936,B9J08_002973,B9J08_004323,B9J08_005069,	13.7	1.89	2.06	0.0361486	0.513396	1
GO:0009311	oligosaccharide metabolic process	18	4	B9J08_001324,B9J08_001383,B9J08_002635,B9J08_004534,	22.2	3.07	3.69	0.0367722	0.513396	1
GO:0010565	regulation of cellular ketone metabolic process	18	4	B9J08_001367,B9J08_004292,B9J08_005272,B9J08_005344,	22.2	3.07	3.69	0.0367722	0.513396	1
GO:0000054	ribosomal subunit export from nucleus	44	7	B9J08_000061,B9J08_000475,B9J08_000883,B9J08_002000,B9J08_002602,B9J08_002808,B9J08_005120,	15.9	2.2	2.45	0.0368457	0.513396	1
GO:0033750	ribosome localization	44	7	B9J08_000061,B9J08_000475,B9J08_000883,B9J08_002000,B9J08_002602,B9J08_002808,B9J08_005120,	15.9	2.2	2.45	0.0368457	0.513396	1
GO:0005975	carbohydrate metabolic process	148	17	B9J08_000050,B9J08_001324,B9J08_001383,B9J08_001529,B9J08_001985,B9J08_002169,B9J08_002188,B9J08_002350,B9J08_002596,B9J08_002635,B9J08_002761,B9J08_003466,B9J08_003568,B9J08_004410,B9J08_004477,B9J08_004534,B9J08_004841,	11.5	1.59	1.7	0.0375869	0.513396	1
GO:0032259	methylation	95	12	B9J08_000193,B9J08_000393,B9J08_000754,B9J08_001451,B9J08_001543,B9J08_002073,B9J08_002808,B9J08_002936,B9J08_002973,B9J08_004323,B9J08_005018,B9J08_005069,	12.6	1.74	1.88	0.0401263	0.513396	1
GO:1901893	positive regulation of cell septum assembly	11	3	B9J08_002838,B9J08_003060,B9J08_003424,	27.3	3.77	4.84	0.0401716	0.513396	1
GO:0010973	positive regulation of division septum assembly	11	3	B9J08_002838,B9J08_003060,B9J08_003424,	27.3	3.77	4.84	0.0401716	0.513396	1
GO:0006740	NADPH regeneration	11	3	B9J08_001633,B9J08_002350,B9J08_004804,	27.3	3.77	4.84	0.0401716	0.513396	1
GO:0032954	regulation of cytokinetic process	27	5	B9J08_001734,B9J08_002838,B9J08_003060,B9J08_003424,B9J08_004935,	18.5	2.56	2.94	0.0416669	0.513396	1
GO:0008380	RNA splicing	107	13	B9J08_000083,B9J08_000188,B9J08_000770,B9J08_000968,B9J08_001026,B9J08_002310,B9J08_002800,B9J08_002883,B9J08_003547,B9J08_003803,B9J08_004631,B9J08_004813,B9J08_005142,	12.1	1.68	1.8	0.0439711	0.513396	1
GO:0003006	developmental process involved in reproduction	118	14	B9J08_000928,B9J08_001956,B9J08_002073,B9J08_002142,B9J08_002635,B9J08_002876,B9J08_003060,B9J08_003368,B9J08_003732,B9J08_003824,B9J08_004240,B9J08_004841,B9J08_005344,B9J08_005380,	11.9	1.64	1.75	0.0445006	0.513396	1
GO:0048869	cellular developmental process	129	15	B9J08_000928,B9J08_001956,B9J08_002073,B9J08_002142,B9J08_002635,B9J08_002876,B9J08_003060,B9J08_003368,B9J08_003732,B9J08_003824,B9J08_003879,B9J08_004240,B9J08_004841,B9J08_005344,B9J08_005380,	11.6	1.61	1.72	0.0446808	0.513396	1
GO:0043954	cellular component maintenance	5	2	B9J08_002838,B9J08_003879,	40	5.52	8.58	0.0451854	0.513396	1
GO:0000395	mRNA 5'-splice site recognition	5	2	B9J08_000083,B9J08_004813,	40	5.52	8.58	0.0451854	0.513396	1
GO:1900864	mitochondrial RNA modification	5	2	B9J08_001598,B9J08_003327,	40	5.52	8.58	0.0451854	0.513396	1
GO:0089718	amino acid import across plasma membrane	5	2	B9J08_001362,B9J08_005564,	40	5.52	8.58	0.0451854	0.513396	1
GO:0001080	nitrogen catabolite activation of transcription from RNA polymerase II promoter	5	2	B9J08_002524,B9J08_004355,	40	5.52	8.58	0.0451854	0.513396	1
GO:0009249	protein lipoylation	5	2	B9J08_000484,B9J08_004802,	40	5.52	8.58	0.0451854	0.513396	1
GO:0070900	mitochondrial tRNA modification	5	2	B9J08_001598,B9J08_003327,	40	5.52	8.58	0.0451854	0.513396	1
GO:0051177	meiotic sister chromatid cohesion	5	2	B9J08_003381,B9J08_003424,	40	5.52	8.58	0.0451854	0.513396	1
GO:0090294	nitrogen catabolite activation of transcription	5	2	B9J08_002524,B9J08_004355,	40	5.52	8.58	0.0451854	0.513396	1
GO:0000212	meiotic spindle organization	5	2	B9J08_002876,B9J08_003424,	40	5.52	8.58	0.0451854	0.513396	1
GO:0016052	carbohydrate catabolic process	46	7	B9J08_001383,B9J08_002188,B9J08_002350,B9J08_002635,B9J08_002761,B9J08_003568,B9J08_004534,	15.2	2.1	2.33	0.0455206	0.513396	1
GO:0055114	obsolete oxidation-reduction process	245	25	B9J08_000581,B9J08_001182,B9J08_001550,B9J08_001633,B9J08_001740,B9J08_001741,B9J08_001930,B9J08_002350,B9J08_002499,B9J08_002657,B9J08_002668,B9J08_002689,B9J08_002737,B9J08_003088,B9J08_003167,B9J08_003466,B9J08_003510,B9J08_003568,B9J08_003628,B9J08_003702,B9J08_003709,B9J08_004341,B9J08_004559,B9J08_004656,B9J08_004804,	10.2	1.41	1.49	0.048614	0.513396	1
Molecular function
ID	Name	Bgd count	Result count	Result gene list	Pct of bgd	Fold enrichment	Odds ratio	P-value	Benjamini	Bonferroni
GO:0003995	acyl-CoA dehydrogenase activity	4	4	B9J08_001740,B9J08_001741,B9J08_003628,B9J08_004656,	100	13.81	inf	2.70807e-05	0.0151652	0.0151652
GO:0004553	hydrolase activity, hydrolyzing O-glycosyl compounds	40	11	B9J08_001324,B9J08_001383,B9J08_001529,B9J08_001985,B9J08_002109,B9J08_002188,B9J08_002596,B9J08_002761,B9J08_004410,B9J08_004477,B9J08_004534,	27.5	3.8	4.99	8.37591e-05	0.0189785	0.0469051
GO:0003700	DNA-binding transcription factor activity	155	25	B9J08_000062,B9J08_000684,B9J08_000862,B9J08_000902,B9J08_001285,B9J08_001367,B9J08_001787,B9J08_002169,B9J08_002170,B9J08_002230,B9J08_002238,B9J08_002423,B9J08_002524,B9J08_002834,B9J08_002840,B9J08_003060,B9J08_003227,B9J08_003229,B9J08_003372,B9J08_003712,B9J08_003772,B9J08_003798,B9J08_004167,B9J08_004355,B9J08_005344,	16.1	2.23	2.58	0.000101671	0.0189785	0.0569356
GO:0000981	DNA-binding transcription factor activity, RNA polymerase II-specific	122	21	B9J08_000684,B9J08_000862,B9J08_000902,B9J08_001285,B9J08_001367,B9J08_001787,B9J08_002169,B9J08_002170,B9J08_002230,B9J08_002238,B9J08_002423,B9J08_002524,B9J08_002840,B9J08_003060,B9J08_003227,B9J08_003229,B9J08_003372,B9J08_003712,B9J08_003772,B9J08_003798,B9J08_004167,	17.2	2.38	2.77	0.000143576	0.0201007	0.0804027
GO:0003997	acyl-CoA oxidase activity	3	3	B9J08_001740,B9J08_001741,B9J08_003628,	100	13.81	inf	0.000376953	0.0422187	0.211094
GO:0019212	phosphatase inhibitor activity	7	4	B9J08_001921,B9J08_003066,B9J08_003611,B9J08_005018,	57.1	7.89	17.27	0.000794358	0.0670218	0.44484
GO:0016798	hydrolase activity, acting on glycosyl bonds	51	11	B9J08_001324,B9J08_001383,B9J08_001529,B9J08_001985,B9J08_002109,B9J08_002188,B9J08_002596,B9J08_002761,B9J08_004410,B9J08_004477,B9J08_004534,	21.6	2.98	3.61	0.000837772	0.0670218	0.469152
GO:0004865	protein serine/threonine phosphatase inhibitor activity	4	3	B9J08_001921,B9J08_003066,B9J08_003611,	75	10.35	38.75	0.00142657	0.0998599	0.798879
GO:0004857	enzyme inhibitor activity	33	8	B9J08_000741,B9J08_001391,B9J08_001921,B9J08_003066,B9J08_003206,B9J08_003611,B9J08_004292,B9J08_005018,	24.2	3.35	4.17	0.00194431	0.120979	1
GO:0000976	transcription cis-regulatory region binding	66	12	B9J08_000062,B9J08_000684,B9J08_000862,B9J08_002230,B9J08_002840,B9J08_003229,B9J08_003372,B9J08_003798,B9J08_003990,B9J08_004167,B9J08_004355,B9J08_005119,	18.2	2.51	2.91	0.00238269	0.122094	1
GO:0001067	transcription regulatory region nucleic acid binding	68	12	B9J08_000062,B9J08_000684,B9J08_000862,B9J08_002230,B9J08_002840,B9J08_003229,B9J08_003372,B9J08_003798,B9J08_003990,B9J08_004167,B9J08_004355,B9J08_005119,	17.6	2.44	2.81	0.00309138	0.122094	1
GO:0005199	structural constituent of cell wall	5	3	B9J08_002560,B9J08_003910,B9J08_004786,	60	8.28	19.37	0.00337496	0.122094	1
GO:0046983	protein dimerization activity	52	10	B9J08_000862,B9J08_002072,B9J08_002073,B9J08_002230,B9J08_003368,B9J08_003369,B9J08_004169,B9J08_005144,B9J08_005145,B9J08_005275,	19.2	2.65	3.11	0.00354252	0.122094	1
GO:0070001	aspartic-type peptidase activity	16	5	B9J08_000398,B9J08_000982,B9J08_002149,B9J08_003911,B9J08_005287,	31.3	4.31	5.89	0.00433956	0.122094	1
GO:0004190	aspartic-type endopeptidase activity	16	5	B9J08_000398,B9J08_000982,B9J08_002149,B9J08_003911,B9J08_005287,	31.3	4.31	5.89	0.00433956	0.122094	1
GO:0000987	cis-regulatory region sequence-specific DNA binding	54	10	B9J08_000062,B9J08_000862,B9J08_002230,B9J08_002840,B9J08_003229,B9J08_003372,B9J08_003798,B9J08_004167,B9J08_004355,B9J08_005119,	18.5	2.56	2.97	0.00470852	0.122094	1
GO:0016298	lipase activity	38	8	B9J08_000017,B9J08_001116,B9J08_002361,B9J08_002560,B9J08_003486,B9J08_004111,B9J08_004259,B9J08_005379,	21.1	2.91	3.47	0.00498253	0.122094	1
GO:0050660	flavin adenine dinucleotide binding	38	8	B9J08_000581,B9J08_001182,B9J08_001598,B9J08_001740,B9J08_001741,B9J08_003628,B9J08_003709,B9J08_004656,	21.1	2.91	3.47	0.00498253	0.122094	1
GO:0034386	4-aminobutyrate:2-oxoglutarate transaminase activity	2	2	B9J08_000863,B9J08_003452,	100	13.81	inf	0.0052326	0.122094	1
GO:0004029	aldehyde dehydrogenase (NAD+) activity	2	2	B9J08_003088,B9J08_003167,	100	13.81	inf	0.0052326	0.122094	1
GO:0051019	mitogen-activated protein kinase binding	2	2	B9J08_002876,B9J08_003229,	100	13.81	inf	0.0052326	0.122094	1
GO:0004030	aldehyde dehydrogenase [NAD(P)+] activity	2	2	B9J08_003088,B9J08_003167,	100	13.81	inf	0.0052326	0.122094	1
GO:0003867	4-aminobutyrate transaminase activity	2	2	B9J08_000863,B9J08_003452,	100	13.81	inf	0.0052326	0.122094	1
GO:0004616	phosphogluconate dehydrogenase (decarboxylating) activity	2	2	B9J08_002350,B9J08_004804,	100	13.81	inf	0.0052326	0.122094	1
GO:0016634	oxidoreductase activity, acting on the CH-CH group of donors, oxygen as acceptor	6	3	B9J08_001740,B9J08_001741,B9J08_003628,	50	6.9	12.91	0.00638889	0.13251	1
GO:0016813	hydrolase activity, acting on carbon-nitrogen (but not peptide) bonds, in linear amidines	6	3	B9J08_002577,B9J08_004292,B9J08_004531,	50	6.9	12.91	0.00638889	0.13251	1
GO:0004864	protein phosphatase inhibitor activity	6	3	B9J08_001921,B9J08_003066,B9J08_003611,	50	6.9	12.91	0.00638889	0.13251	1
GO:0140110	transcription regulator activity	206	25	B9J08_000062,B9J08_000684,B9J08_000862,B9J08_000902,B9J08_001285,B9J08_001367,B9J08_001787,B9J08_002169,B9J08_002170,B9J08_002230,B9J08_002238,B9J08_002423,B9J08_002524,B9J08_002834,B9J08_002840,B9J08_003060,B9J08_003227,B9J08_003229,B9J08_003372,B9J08_003712,B9J08_003772,B9J08_003798,B9J08_004167,B9J08_004355,B9J08_005344,	12.1	1.68	1.83	0.00678354	0.135671	1
GO:0004806	triglyceride lipase activity	20	5	B9J08_000017,B9J08_001116,B9J08_002361,B9J08_004111,B9J08_005379,	25	3.45	4.32	0.0121174	0.233992	1
GO:0046982	protein heterodimerization activity	28	6	B9J08_002072,B9J08_002073,B9J08_003368,B9J08_003369,B9J08_005144,B9J08_005145,	21.4	2.96	3.54	0.0133114	0.248479	1
GO:0004633	phosphopantothenoylcysteine decarboxylase activity	3	2	B9J08_001921,B9J08_005018,	66.7	9.2	25.76	0.0149439	0.269954	1
GO:0017022	myosin binding	8	3	B9J08_001971,B9J08_002838,B9J08_004935,	37.5	5.18	7.74	0.0160367	0.280642	1
GO:0016491	oxidoreductase activity	360	37	B9J08_000322,B9J08_000370,B9J08_000484,B9J08_000581,B9J08_001182,B9J08_001325,B9J08_001550,B9J08_001633,B9J08_001688,B9J08_001733,B9J08_001740,B9J08_001741,B9J08_001930,B9J08_001956,B9J08_002026,B9J08_002350,B9J08_002361,B9J08_002499,B9J08_002657,B9J08_002668,B9J08_002689,B9J08_002737,B9J08_002830,B9J08_002838,B9J08_002847,B9J08_003088,B9J08_003167,B9J08_003466,B9J08_003510,B9J08_003568,B9J08_003…	10.3	1.42	1.52	0.0168719	0.286311	1
GO:0000978	RNA polymerase II cis-regulatory region sequence-specific DNA binding	38	7	B9J08_000062,B9J08_000862,B9J08_002230,B9J08_003229,B9J08_003372,B9J08_004167,B9J08_004355,	18.4	2.54	2.93	0.017575	0.288869	1
GO:0000977	RNA polymerase II transcription regulatory region sequence-specific DNA binding	47	8	B9J08_000062,B9J08_000684,B9J08_000862,B9J08_002230,B9J08_003229,B9J08_003372,B9J08_004167,B9J08_004355,	17	2.35	2.67	0.0181498	0.288869	1
GO:0016627	oxidoreductase activity, acting on the CH-CH group of donors	30	6	B9J08_001740,B9J08_001741,B9J08_001956,B9J08_002689,B9J08_003628,B9J08_004656,	20	2.76	3.24	0.0185701	0.288869	1
GO:0019208	phosphatase regulator activity	23	5	B9J08_001921,B9J08_002466,B9J08_003066,B9J08_003611,B9J08_005018,	21.7	3	3.6	0.021997	0.316907	1
GO:0003676	nucleic acid binding	882	78	B9J08_000061,B9J08_000062,B9J08_000083,B9J08_000152,B9J08_000188,B9J08_000193,B9J08_000214,B9J08_000257,B9J08_000475,B9J08_000537,B9J08_000684,B9J08_000754,B9J08_000770,B9J08_000825,B9J08_000855,B9J08_000862,B9J08_000883,B9J08_000902,B9J08_001026,B9J08_001122,B9J08_001133,B9J08_001336,B9J08_001610,B9J08_001766,B9J08_001912,B9J08_002000,B9J08_002072,B9J08_002073,B9J08_002081,B9J08_002169,B9J08_002…	8.8	1.22	1.31	0.0268018	0.316907	1
GO:0003677	DNA binding	422	41	B9J08_000061,B9J08_000062,B9J08_000152,B9J08_000684,B9J08_000825,B9J08_000855,B9J08_000862,B9J08_000902,B9J08_001610,B9J08_002072,B9J08_002073,B9J08_002081,B9J08_002169,B9J08_002230,B9J08_002423,B9J08_002524,B9J08_002834,B9J08_002840,B9J08_002875,B9J08_003042,B9J08_003227,B9J08_003229,B9J08_003368,B9J08_003369,B9J08_003372,B9J08_003424,B9J08_003428,B9J08_003712,B9J08_003798,B9J08_003803,B9J08_003…	9.7	1.34	1.43	0.0287332	0.316907	1
GO:0001228	DNA-binding transcription activator activity, RNA polymerase II-specific	33	6	B9J08_002230,B9J08_002423,B9J08_002524,B9J08_003229,B9J08_003372,B9J08_004167,	18.2	2.51	2.88	0.0288686	0.316907	1
GO:0001216	DNA-binding transcription activator activity	33	6	B9J08_002230,B9J08_002423,B9J08_002524,B9J08_003229,B9J08_003372,B9J08_004167,	18.2	2.51	2.88	0.0288686	0.316907	1
GO:0071949	FAD binding	17	4	B9J08_001182,B9J08_001740,B9J08_001741,B9J08_003628,	23.5	3.25	3.98	0.030278	0.316907	1
GO:1990837	sequence-specific double-stranded DNA binding	102	13	B9J08_000062,B9J08_000684,B9J08_000862,B9J08_002230,B9J08_002840,B9J08_003229,B9J08_003372,B9J08_003424,B9J08_003798,B9J08_003990,B9J08_004167,B9J08_004355,B9J08_005119,	12.7	1.76	1.91	0.0313901	0.316907	1
GO:0022857	transmembrane transporter activity	357	35	B9J08_000032,B9J08_000928,B9J08_000938,B9J08_000982,B9J08_001015,B9J08_001183,B9J08_001362,B9J08_001487,B9J08_001526,B9J08_001527,B9J08_001528,B9J08_001737,B9J08_001899,B9J08_002168,B9J08_002237,B9J08_002480,B9J08_002646,B9J08_002659,B9J08_002660,B9J08_002965,B9J08_003703,B9J08_004040,B9J08_004099,B9J08_004113,B9J08_004204,B9J08_004243,B9J08_004264,B9J08_004533,B9J08_004662,B9J08_004797,B9J08_004…	9.8	1.35	1.44	0.0372219	0.316907	1
GO:0043565	sequence-specific DNA binding	159	18	B9J08_000062,B9J08_000684,B9J08_000862,B9J08_002081,B9J08_002230,B9J08_002423,B9J08_002524,B9J08_002840,B9J08_003227,B9J08_003229,B9J08_003372,B9J08_003424,B9J08_003798,B9J08_003990,B9J08_004167,B9J08_004355,B9J08_005119,B9J08_005344,	11.3	1.56	1.67	0.037385	0.316907	1
GO:0004860	protein kinase inhibitor activity	11	3	B9J08_000741,B9J08_001391,B9J08_003206,	27.3	3.77	4.84	0.0401716	0.316907	1
GO:0019210	kinase inhibitor activity	11	3	B9J08_000741,B9J08_001391,B9J08_003206,	27.3	3.77	4.84	0.0401716	0.316907	1
GO:0051010	microtubule plus-end binding	11	3	B9J08_000811,B9J08_003824,B9J08_003828,	27.3	3.77	4.84	0.0401716	0.316907	1
GO:0008757	S-adenosylmethionine-dependent methyltransferase activity	75	10	B9J08_000193,B9J08_000754,B9J08_001451,B9J08_001543,B9J08_002537,B9J08_002808,B9J08_002936,B9J08_002973,B9J08_004323,B9J08_005069,	13.3	1.84	2	0.0424734	0.316907	1
GO:0016741	transferase activity, transferring one-carbon groups	107	13	B9J08_000193,B9J08_000393,B9J08_000754,B9J08_001451,B9J08_001543,B9J08_002537,B9J08_002771,B9J08_002808,B9J08_002936,B9J08_002973,B9J08_004323,B9J08_005018,B9J08_005069,	12.1	1.68	1.8	0.0439711	0.316907	1
GO:0019901	protein kinase binding	19	4	B9J08_000029,B9J08_002876,B9J08_003229,B9J08_004227,	21.1	2.91	3.44	0.0440053	0.316907	1
GO:0019900	kinase binding	19	4	B9J08_000029,B9J08_002876,B9J08_003229,B9J08_004227,	21.1	2.91	3.44	0.0440053	0.316907	1
GO:0004559	alpha-mannosidase activity	5	2	B9J08_001383,B9J08_002188,	40	5.52	8.58	0.0451854	0.316907	1
GO:0019237	centromeric DNA binding	5	2	B9J08_002230,B9J08_003424,	40	5.52	8.58	0.0451854	0.316907	1
GO:0015923	mannosidase activity	5	2	B9J08_001383,B9J08_002188,	40	5.52	8.58	0.0451854	0.316907	1
GO:0032036	myosin heavy chain binding	5	2	B9J08_002838,B9J08_004935,	40	5.52	8.58	0.0451854	0.316907	1
GO:0032038	myosin II heavy chain binding	5	2	B9J08_002838,B9J08_004935,	40	5.52	8.58	0.0451854	0.316907	1
Cellular component
ID	Name	Bgd count	Result count	Result gene list	Pct of bgd	Fold enrichment	Odds ratio	P-value	Benjamini	Bonferroni
GO:0000786	nucleosome	9	7	B9J08_000855,B9J08_002072,B9J08_002073,B9J08_003368,B9J08_003369,B9J08_005144,B9J08_005145,	77.8	10.74	45.74	3.12701e-07	0.00012039	0.00012039
GO:0044815	DNA packaging complex	11	7	B9J08_000855,B9J08_002072,B9J08_002073,B9J08_003368,B9J08_003369,B9J08_005144,B9J08_005145,	63.6	8.79	22.86	2.52185e-06	0.000485456	0.000970912
GO:0005730	nucleolus	222	34	B9J08_000061,B9J08_000062,B9J08_000214,B9J08_000257,B9J08_000475,B9J08_000537,B9J08_000673,B9J08_000754,B9J08_000883,B9J08_001026,B9J08_001133,B9J08_001139,B9J08_001872,B9J08_002000,B9J08_002081,B9J08_002211,B9J08_002253,B9J08_002808,B9J08_002981,B9J08_003196,B9J08_003206,B9J08_003821,B9J08_003906,B9J08_003990,B9J08_004169,B9J08_004311,B9J08_004414,B9J08_004625,B9J08_005015,B9J08_005069,B9J08_005…	15.3	2.11	2.46	1.7562e-05	0.00225379	0.00676138
GO:0005686	U2 snRNP	15	7	B9J08_000770,B9J08_000968,B9J08_002222,B9J08_002800,B9J08_003547,B9J08_005142,B9J08_005327,	46.7	6.44	11.42	3.80912e-05	0.00366628	0.0146651
GO:0044428	obsolete nuclear part	192	29	B9J08_000061,B9J08_000062,B9J08_000214,B9J08_000257,B9J08_000475,B9J08_000537,B9J08_000673,B9J08_000754,B9J08_000883,B9J08_001026,B9J08_001133,B9J08_001139,B9J08_001872,B9J08_002000,B9J08_002211,B9J08_002253,B9J08_002808,B9J08_002981,B9J08_003196,B9J08_003821,B9J08_003990,B9J08_004311,B9J08_004625,B9J08_005015,B9J08_005069,B9J08_005116,B9J08_005120,B9J08_005126,B9J08_005373,	15.1	2.09	2.4	9.6921e-05	0.00746292	0.0373146
GO:0030684	preribosome	125	21	B9J08_000061,B9J08_000111,B9J08_000214,B9J08_000257,B9J08_000475,B9J08_000673,B9J08_001133,B9J08_001139,B9J08_002000,B9J08_002081,B9J08_002211,B9J08_002602,B9J08_002981,B9J08_003035,B9J08_003206,B9J08_003821,B9J08_003906,B9J08_004311,B9J08_004625,B9J08_005069,B9J08_005126,	16.8	2.32	2.69	0.000204687	0.0131341	0.0788046
GO:0005618	cell wall	45	11	B9J08_000050,B9J08_002109,B9J08_002560,B9J08_002596,B9J08_002761,B9J08_003910,B9J08_004112,B9J08_004383,B9J08_004410,B9J08_004498,B9J08_004786,	24.4	3.37	4.25	0.000264681	0.0145575	0.101902
GO:0030312	external encapsulating structure	46	11	B9J08_000050,B9J08_002109,B9J08_002560,B9J08_002596,B9J08_002761,B9J08_003910,B9J08_004112,B9J08_004383,B9J08_004410,B9J08_004498,B9J08_004786,	23.9	3.3	4.13	0.00032575	0.0156767	0.125414
GO:0030686	90S preribosome	38	9	B9J08_000061,B9J08_000257,B9J08_001139,B9J08_002000,B9J08_002081,B9J08_003906,B9J08_004311,B9J08_005069,B9J08_005126,	23.7	3.27	4.06	0.00122464	0.0523876	0.471488
GO:0097525	spliceosomal snRNP complex	47	10	B9J08_000083,B9J08_000770,B9J08_000968,B9J08_001026,B9J08_002222,B9J08_002800,B9J08_002883,B9J08_003547,B9J08_005142,B9J08_005327,	21.3	2.94	3.54	0.00160348	0.0561218	0.61734
GO:0030532	small nuclear ribonucleoprotein complex	47	10	B9J08_000083,B9J08_000770,B9J08_000968,B9J08_001026,B9J08_002222,B9J08_002800,B9J08_002883,B9J08_003547,B9J08_005142,B9J08_005327,	21.3	2.94	3.54	0.00160348	0.0561218	0.61734
GO:0120114	Sm-like protein family complex	49	10	B9J08_000083,B9J08_000770,B9J08_000968,B9J08_001026,B9J08_002222,B9J08_002800,B9J08_002883,B9J08_003547,B9J08_005142,B9J08_005327,	20.4	2.82	3.35	0.002235	0.0717062	0.860475
GO:0032040	small-subunit processome	45	9	B9J08_000214,B9J08_000257,B9J08_000673,B9J08_001133,B9J08_002081,B9J08_002211,B9J08_002981,B9J08_003821,B9J08_003906,	20	2.76	3.26	0.00424343	0.118503	1
GO:0005681	spliceosomal complex	71	12	B9J08_000083,B9J08_000188,B9J08_000770,B9J08_001026,B9J08_002222,B9J08_002800,B9J08_002883,B9J08_003547,B9J08_003803,B9J08_004631,B9J08_004813,B9J08_005327,	16.9	2.33	2.66	0.00446574	0.118503	1
GO:0000939	inner kinetochore	2	2	B9J08_003381,B9J08_003757,	100	13.81	inf	0.0052326	0.118503	1
GO:0070274	RES complex	2	2	B9J08_004631,B9J08_005142,	100	13.81	inf	0.0052326	0.118503	1
GO:0031511	Mis6-Sim4 complex	2	2	B9J08_003381,B9J08_003757,	100	13.81	inf	0.0052326	0.118503	1
GO:0031907	microbody lumen	11	4	B9J08_000581,B9J08_001740,B9J08_001956,B9J08_003466,	36.4	5.02	7.39	0.00593037	0.120168	1
GO:0005782	peroxisomal matrix	11	4	B9J08_000581,B9J08_001740,B9J08_001956,B9J08_003466,	36.4	5.02	7.39	0.00593037	0.120168	1
GO:0000142	cellular bud neck contractile ring	12	4	B9J08_000228,B9J08_002838,B9J08_004383,B9J08_004935,	33.3	4.6	6.47	0.0083945	0.154234	1
[truncated: 71 more rows]

## Sheet: Sheet4
Sheet 4	ISA treated WT vs. ISA treated non-WT
[truncated: 633 more rows]

[truncated: 1 more sheets: Sheet5]
