# Supplementary material for: Isolate Specific Transcriptome Changes Exerted by Isavuconazole Treatment in Candida auris
Source: Springer Nature journal article supplement (doi:10.1007/s11046-024-00919-1), 2024-12-27
Supplement: MOESM2 [file 11046_2024_919_MOESM2_ESM.xlsx]

## Sheet: Munka1
Table S2	RT-qPCR data of selected genes
The supplementary material contains:
RT-qPCR data of the selected genes
Correlation data between the RT-qPCR (ΔΔCP) and RNAseq (log2FC) data
Sequences of the used primer pairs
Candida auris Gene ID	Candida albicans Gene name	RT-qPCR (ΔΔCP)								RNAseq (log2FC)				Feature
		non-WT+ISA vs. untreated non-WT		WT+ISA vs. untreated WT		untreated WT vs. untreated non-WT		WT+ISA vs. non-WT+ISA		non-WT+ISA vs. untreated non-WT	WT+ISA vs. untreated WT	untreated WT vs. untreated non-WT	WT+ISA vs. non-WT+ISA
		Mean	SD	Mean	SD	Mean	SD	Mean	SD
B9J08_000486	ACT1	0.16	0.02	0.02	0.015	0.025	0.02	0.14	0.015	0.0314875	0.102271	0.00883772	0.0796213	Actin
B9J08_002834	EFG1	-0.68	0.1	-0.2	0.24	-1.5	0.3	-1	0.1	-0.297542	-0.17189	-0.599819	-0.474168	bHLH transcription factor
B9J08_000367	ERG25	3.155	0.2	1.825	0.23	0.46	0.03	-0.87	0.4	2.19223	1.72777	0.289491	-0.174969	Putative C-4 methyl sterol oxidase
B9J08_000175	PMC1	0.73	0.311127	0.9	0.0707107	0.61	0.353553	0.78	0.0282843	0.657809	0.622783	0.734067	0.69904	Vacuolar calcium P-type ATPase
B9J08_001458/ SCF1		-0.985	0.388909	-0.28	0.0282843	-2.58	0.59397	-1.875	0.954594	-0.0915593	-0.0945405	-1.75094	-1.75392	Surface Colonization Factor
B9J08_000654	SVF1	0.24	0.141421	1.065	0.148492	0.12	0.0848528	0.945	0.374767	0.167592	0.622934	0.0951501	0.550492	Ceramide binding
B9J08_000270/ UPC2	UPC2	1.165	0.0777817	0.745	0.205061	0.85	0.155563	0.43	0.282843	0.72944	0.657168	0.642282	0.570011	Zn2-Cys6 transcript factor; regulator of ergosterol biosynthetic genes
B9J08_003981/ MDR1	MDR1	1.33	0.777817	1.685	0.53033	3.59	0.240416	3.945	0.00707107	0.975747	1.78266	2.4117	3.21861	Plasma membrane MDR/MFS multidrug efflux pump
B9J08_000164/ CDR1	CDR1	0.375	0.869741	0.385	0.954594	2.21	0.155563	2.22	0.0707107	0.0741052	0.394478	1.13684	1.45721	Multidrug transporter of ABC superfamily
B9J08_001484	POT1	0.405	0.0777817	-0.215	0.190919	-0.275	0.162635	-0.895	0.431335	0.520926	0.17112	-0.56126	-0.911066	Putative peroxisomal 3-oxoacyl CoA thiolase
Pearson's correlation coefficient (RNAseq vs. RT-qPCR):
non-WT+ISA vs. untreated non-WT				0.9284
WT+ISA vs. untreated WT				0.9167
untreated WT vs. untreated non-WT				0.955
WT+ISA vs. non-WT+ISA				0.9603
Figure represents mean ± SD calculated from three biological replicates.
Primer pairs used in the study
ACT1
5´-CTTGTTCCCAGGTATTGC-3´ and 5´-CTCGTCGTATTCTTGCTTG-3´
EFG1
5´-GCT GCC TCC GAC TAC TC -3´ and 5´-CAT TCC CGC CTA GAG AG -3´
ERG25
5´-CTC TTT CTC GGC TCC TTT C -3´ and 5´-ATA ACG GTG GTG TTG CTT G -3´
PMC1
5´-GTC GTC GCC GTT ACT G -3´ and 5´-AGT CGC CGT TTG AAG AG -3´
SCF1
5´-GTG AGA GTG AGG TCG GAA CG -3´ and 5´-CAG CTT CTC CTT CTG GCT CC -3´
SVF1
5´-GGA CGG CAC AAC TTA CC -3´ and 5´-TGG GGC TTC ATA CCT TG -3´
UPC2
5´-GAC ACC GCC ACC TAA CCT ATC -3´ and 5´-CCC AAA CTG CTC AAA TCA CC-3´
MDR1
5´-CGACCAAGACCAACCACATTC-3´ and 5´-CGTATCCGAACACAAAAAGCG-3´
CDR1
5´-TTGGAGATGGGTGCTTAC-3´ and 5´-GCTGAAGGTTGATGGATG-3´
POT1
5´-CCCTTCCTCCAAACAGTC-3´ and 5´-AATACCAGCAGCCAAACAG-3´
